# Supplementary material for: Quantitative analysis of 1300-nm three-photon calcium imaging in the mouse brain
Source: eLife. 2020 Jan 30;9:e53205. doi: 10.7554/eLife.53205 (PMC7028383; doi:10.7554/eLife.53205)
Supplement: Figure 1—figure supplement 1—source data 1. [file elife-53205-fig1-figsupp1-data1.xlsx]

## Sheet: Mouse 1
2P Depth (um)	920-nm Power Transmission	3P Depth (um)	1320-nm Power Transmission
600	0.0308305	600	0.11511
590	0.0364902	590	0.13763
580	0.0350751	580	0.142922
570	0.0390581	570	0.148247
560	0.0449441	560	0.150794
550	0.0499617	550	0.166438
540	0.0481365	540	0.166055
530	0.0481067	530	0.168496
520	0.054011	520	0.180845
510	0.0545218	510	0.176975
500	0.0643414	500	0.198419
500	0.0626555	500	0.200756
490	0.06079	490	0.196422
480	0.0686604	480	0.210389
470	0.0720763	470	0.212889
460	0.081427	460	0.219469
450	0.0823165	450	0.225849
440	0.0822612	440	0.234448
430	0.0907902	430	0.243833
420	0.0895693	420	0.247986
410	0.110363	410	0.272563
410	0.113604	410	0.249424
410	0.0988806	410	0.267801
400	0.112468	400	0.250092
400	0.0994413	400	0.270842
390	0.119255	390	0.261435
390	0.109363	390	0.277868
380	0.150453	380	0.289263
380	0.132566	380	0.317159
370	0.146328	370	0.281203
370	0.128823	370	0.305811
360	0.175604	360	0.299881
360	0.138665	360	0.350401
350	0.19415	350	0.321189
350	0.155446	350	0.369442
340	0.197614	340	0.322604
340	0.157524	340	0.365207
330	0.197714	330	0.320052
330	0.165215	330	0.38491
320	0.204236	320	0.323688
320	0.16998	320	0.372019
310	0.226638	310	0.337742
310	0.191809	310	0.388047
310	0.20863	310	0.404823
300	0.224525	300	0.408183
290	0.286002	290	0.501451
280	0.275593	280	0.472181
270	0.289756	270	0.488721
260	0.305701	260	0.48215
250	0.323355	250	0.522537
240	0.33353	240	0.501361
230	0.342251	230	0.520069
220	0.384991	220	0.54939
210	0.405387	210	0.560839
210	0.439721	210	0.594961
200	0.462198	200	0.604734
190	0.468275	190	0.630366
180	0.497884	180	0.654608
170	0.519055	170	0.694428
160	0.501895	160	0.657961
150	0.555946	150	0.713271
140	0.573083	140	0.743884
130	0.56855	130	0.749231
120	0.61306	120	0.731585
110	0.674874	110	0.793835
100	0.630858	100	0.732663
100	0.643403	100	0.726759
90	0.742552	90	0.80437
80	0.752097	80	0.813047
70	0.760247	70	0.850114
60	0.794724	60	0.851566
50	0.829015	50	0.857949
40	0.853172	40	0.850595
30	0.914144	30	0.919302
20	1	20	0.929565
10	0.977573	10	0.920777
		0	0.946276
		0	1

## Sheet: Mouse 2
2P Depth (um)	920-nm Power Transmission	3P Depth (um)	1320-nm Power Transmission
860	0.0477176	860	0.00254431
840	0.0505684	840	0.00279558
820	0.0552679	820	0.00301621
800	0.057614	800	0.00346366
780	0.063237	780	0.00403896
760	0.0715739	760	0.00514431
740	0.0720815	740	0.0054598
740	0.080756	740	0.00611257
730	0.0912941	730	0.00703683
730	0.0889951	730	0.00661192
720	0.0899197	720	0.00607135
710	0.103953	710	0.00991461
710	0.0992741	710	0.00865834
700	0.0968386	700	0.00813805
690	0.114989	690	0.0109291
690	0.114902	690	0.0101497
680	0.10723	680	0.00961821
670	0.112701	670	0.0133021
670	0.112121	670	0.0125854
660	0.112092	660	0.0109873
650	0.127952	650	0.0143441
650	0.125375	650	0.0131023
640	0.115981	640	0.0127217
630	0.131041	630	0.0160661
630	0.129399	630	0.0152205
620	0.129573	620	0.0152054
620	0.135569	620	0.0146722
600	0.147494	600	0.0166864
580	0.154351	580	0.0184698
560	0.165921	560	0.0221756
540	0.181366	540	0.0242462
520	0.190042	520	0.0287649
520	0.202829	520	0.0313904
500	0.238353	500	0.0408877
480	0.228895	480	0.0447682
460	0.26691	460	0.0533006
440	0.278699	440	0.0695622
420	0.290902	420	0.0716133
420	0.289718	420	0.073619
400	0.307338	400	0.0811146
380	0.306778	380	0.0905935
360	0.339452	360	0.105661
340	0.369456	340	0.128925
320	0.362114	320	0.127555
320	0.368812	320	0.141064
300	0.466194	300	0.194455
280	0.417893	280	0.201899
260	0.454512	260	0.223266
240	0.49263	240	0.276251
220	0.526507	220	0.310924
200	0.559222	200	0.33637
200	0.557003	200	0.306369
180	0.576735	180	0.302588
160	0.534304	160	0.324676
140	0.542166	140	0.353662
120	0.702966	120	0.447474
100	0.786526	100	0.536821
80	0.810177	80	0.587022
60	0.763152	60	0.515864
40	0.792417	40	0.671692
40	0.843536	40	0.639039
20	0.855811	20	0.853201
0	1	0	1

## Sheet: Mouse 3
2P Depth (um)	920-nm Power Transmission	3P Depth (um)	1320-nm Power Transmission
540	0.173622	540	0.0231893
520	0.206489	520	0.0278027
500	0.201176	500	0.0308463
480	0.215418	480	0.0384109
460	0.22723	460	0.0438774
440	0.222332	440	0.0490011
440	0.303561	440	0.052564
420	0.302519	420	0.054664
400	0.341999	400	0.0666387
380	0.369547	380	0.0820352
380	0.369253	380	0.110813
360	0.381876	360	0.131398
340	0.384967	340	0.146358
320	0.376604	320	0.157359
300	0.401847	300	0.189431
300	0.461791	300	0.193342
280	0.478278	280	0.202198
260	0.498257	260	0.216547
240	0.508778	240	0.235953
220	0.529292	220	0.252423
200	0.548305	200	0.278724
200	0.596708	200	0.297442
180	0.627445	180	0.350239
160	0.633333	160	0.34691
140	0.65116	140	0.356314
120	0.682137	120	0.403844
100	0.749125	100	0.47262
100	0.823225	100	0.510404
80	0.835135	80	0.612831
60	0.915089	60	0.646786
40	0.938569	40	0.827102
20	1	20	1
