# Supplementary material for: Quantitative analysis of 1300-nm three-photon calcium imaging in the mouse brain
Source: eLife. 2020 Jan 30;9:e53205. doi: 10.7554/eLife.53205 (PMC7028383; doi:10.7554/eLife.53205)
Supplement: Figure 1—source data 3. [file elife-53205-fig1-data3.csv]

3P Neuron Depth (um)	3PE Pulse Energy at the Brain Surface (nJ)	2P Neuron Depth (um)	2PE Pulse Energy at the Brain Surface (nJ)
225.2675325	4.078174383	199.2743169	0.669355393
225.2675325	3.765006006	199.2743169	0.706937284
223.3649351	3.70427311	197.5912568	0.688768955
229.0727273	3.851150395	202.6404372	0.722465343
230.9753247	3.975568624	204.3234973	0.731172947
232.8779221	4.232735279	206.0065574	0.709012728
232.8779221	4.627046389	206.0065574	0.716812776
232.8779221	4.707648389	206.0065574	0.739486123
232.8779221	4.990627389	206.0065574	0.820032298
232.8779221	5.101520065	206.0065574	0.827848275
232.8779221	5.066977055	206.0065574	0.825820662
404.5290323	9.086866575	356.2810811	1.954510679
404.5290323	10.86424509	356.2810811	2.165013506
402.6387097	8.558822382	354.6162162	1.865537879
402.6387097	9.284704747	354.6162162	1.828492326
400.7483871	7.542565179	352.9513514	1.549841189
398.8580645	10.89173597	351.2864865	2.371055502
398.8580645	8.262645033	351.2864865	1.806613444
398.8580645	9.374340872	351.2864865	1.923031983
396.9677419	9.483717834	349.6216216	1.958406335
396.9677419	9.72742958	349.6216216	2.179976479
396.9677419	9.009090784	349.6216216	1.819658802
395.0774194	9.699690979	347.9567568	1.982348868
395.0774194	9.91532927	347.9567568	2.040788311
393.1870968	9.873829803	346.2918919	2.03405296
393.1870968	9.567802138	346.2918919	1.939737003
391.2967742	9.601600796	344.627027	1.966399262
396.4006452	10.16711643	349.1221622	1.870177565
396.4006452	10.3741076	349.1221622	1.940633005
394.5103226	9.225480533	347.4572973	1.664820814
392.62	9.042964823	345.7924324	1.653419727
390.7296774	9.358407039	344.1275676	1.741911676
388.8393548	10.70006345	342.4627027	2.078161843
388.8393548	10.25748257	342.4627027	2.215638449
390.7296774	8.931835231	344.1275676	1.815053211
392.62	9.804059745	345.7924324	2.020037133
394.5103226	10.0106841	347.4572973	2.039055296
349.2746032	7.236068655	340.1588235	1.689687546
349.2746032	7.363476779	340.1588235	1.631038892
350.8248677	7.749715519	341.6686275	1.791891951
347.7243386	7.72080168	338.6490196	1.854590894
346.1740741	7.03154545	337.1392157	1.403163001
344.6238095	6.758579271	335.6294118	1.578745617
344.6238095	5.680825785	335.6294118	1.157690415
346.1740741	6.486588445	337.1392157	1.415853845
347.7243386	6.848937948	338.6490196	1.567298439
343.073545	6.507783929	334.1196078	1.416084911
246.337037	5.246670849	239.9078431	1.064404609
246.337037	5.379027577	239.9078431	1.096764657
244.7867725	5.269620077	238.3980392	1.128915912
237.810582	3.856260941	231.6039216	0.851700059
239.3608466	3.712931154	233.1137255	0.778502519
240.9111111	3.692916985	234.6235294	0.826016405
242.4613757	3.645824511	236.1333333	0.825171691
244.0116402	3.760961526	237.6431373	0.804393506
249.2825397	3.974156017	242.7764706	0.833964844
247.7322751	3.865551833	241.2666667	0.790909299
247.7322751	4.379697459	241.2666667	1.010473992
253.1582011	4.102766347	246.5509804	0.970684379
254.7084656	4.334020029	248.0607843	0.913258305
595.2710448	12.42395562	635.2266667	6.841892117
539.2949254	11.72939546	575.4933333	4.74966461
539.2949254	12.1498796	575.4933333	5.135802943
539.2949254	13.0964483	575.4933333	6.18489464
539.2949254	14.06914639	575.4933333	6.644300839
539.2949254	14.13387153	575.4933333	6.42352513
512.7062687	10.01291863	547.12	4.944677196
512.7062687	11.61947539	547.12	6.306077685
512.7062687	10.35716736	547.12	5.392591921
512.7062687	11.26710116	547.12	5.889483148
512.7062687	10.5494665	547.12	5.454290181
512.7062687	12.29277977	547.12	6.789515626
512.7062687	12.04488828	547.12	6.935929462
543.1432836	10.58982274	579.6	5.813205853
543.1432836	10.1068732	579.6	5.380841849
543.1432836	10.31333957	579.6	5.568009719
561.6853731	11.848046	599.3866667	4.856613348
561.6853731	12.98891729	599.3866667	5.982880558
561.6853731	14.75948029	599.3866667	7.306168616
561.6853731	12.27331124	599.3866667	5.402766222
561.6853731	11.66158072	599.3866667	4.446041875
447.9838806	8.15554806	478.0533333	2.902923023
447.9838806	9.06946769	478.0533333	3.022135717
447.9838806	7.799922598	478.0533333	2.617365527
447.9838806	9.76004822	478.0533333	3.380263369
447.9838806	8.163674198	478.0533333	2.901027126
447.9838806	10.07133732	478.0533333	3.693843833
375.9146269	5.227058918	401.1466667	1.112617436
375.9146269	5.022523259	401.1466667	0.941803132
375.9146269	5.246835876	401.1466667	1.155307578
375.9146269	5.270366551	401.1466667	1.172422493
375.9146269	6.147277741	401.1466667	1.582714219
495.8827027	13.25430144	535.7488889	5.826978187
522.1735135	10.71719713	564.1533333	4.397640901
522.1735135	10.22207378	564.1533333	3.799390765
522.1735135	9.95573517	564.1533333	3.564342087
522.1735135	9.403922945	564.1533333	3.085691937
543.8713514	10.95579537	587.5955556	5.235797224
543.8713514	11.3272415	587.5955556	5.62015023
543.8713514	10.84491325	587.5955556	5.167238121
601.8378378	14.48553127	650.2222222	9.539124498
601.8378378	14.10655633	650.2222222	9.434897747
601.8378378	15.1665481	650.2222222	11.61594243
605.1637838	17.94839354	653.8155556	11.16252515
609.7567568	14.05690605	658.7777778	7.288367157
623.3772973	17.69844951	673.4933333	9.908141672
623.3772973	18.23525451	673.4933333	9.749823451
623.3772973	15.11559378	673.4933333	6.98216256
623.3772973	17.38118014	673.4933333	9.063138698
623.3772973	15.38143552	673.4933333	7.42681456
648.7178378	17.44221203	700.8711111	9.135674322
648.7178378	19.7592705	700.8711111	10.5273645
596.7697297	15.80627558	644.7466667	6.497237153
596.7697297	15.72031974	644.7466667	6.1635972
542.7627027	12.38095912	586.3977778	6.785613902
542.7627027	12.00550971	586.3977778	6.276491421
463.5735135	9.861303957	500.8422222	4.265632101
463.5735135	9.528466592	500.8422222	3.936926008
463.5735135	9.676400833	500.8422222	4.045590758
463.5735135	9.652550858	500.8422222	3.975742425
463.5735135	9.980359719	500.8422222	4.272601601
463.5735135	7.948181041	500.8422222	3.513540288
548.7810811	11.10160096	592.9	3.797483238
519.4810811	10.71354993	561.2444444	4.246290949
519.4810811	10.88614101	561.2444444	4.116533899
519.4810811	9.399377957	561.2444444	2.900736021
519.4810811	10.69223993	561.2444444	3.892196023
393.4118919	5.106887043	425.04	1.261885702
393.4118919	5.153251122	425.04	1.296537411
393.4118919	5.390592938	425.04	1.42182133
393.4118919	4.553498622	425.04	0.989920533
378.3659459	4.411144806	408.7844444	1.05529363
378.3659459	4.154018147	408.7844444	0.935913619
378.3659459	3.795154435	408.7844444	0.747615848
378.3659459	3.933162471	408.7844444	0.824887455
367.1210811	3.311824283	396.6355556	0.544461545
367.1210811	3.295432494	396.6355556	0.542655115
367.1210811	3.5151489	396.6355556	0.612023988
367.1210811	3.391916088	396.6355556	0.5771068
432.0562162	6.758424105	466.7911111	2.892059226
432.0562162	7.027157526	466.7911111	2.741637975
432.0562162	6.469644873	466.7911111	2.562698572
