# Supplementary material for: Quantitative analysis of 1300-nm three-photon calcium imaging in the mouse brain
Source: eLife. 2020 Jan 30;9:e53205. doi: 10.7554/eLife.53205 (PMC7028383; doi:10.7554/eLife.53205)
Supplement: Figure 2—figure supplement 1—source data 1. [file elife-53205-fig2-figsupp1-data1.csv]

Depth (um)	Labeling Density
730	0.013422304
720	0.011159687
710	0.028992177
700	0.014879583
690	0.007861635
690	0.007248044
680	0.007248044
670	0.028225188
660	0.01783249
650	0.022817917
640	0.020171805
640	0.022204326
630	0.025272281
620	0.017372296
610	0.014994631
600	0.018906274
590	0.015531523
1060	0.020900445
1050	0.020938794
1040	0.0205553
1030	0.024351894
1020	0.020900445
1010	0.030909649
1010	0.029797515
1000	0.021168891
990	0.019251419
980	0.019404817
970	0.010354349
970	0.012655315
960	0.029529069
950	0.022549471
940	0.015838319
930	0.009970854
920	0.015148029
910	0.012962111
910	0.020286854
900	0.023239761
890	0.014419389
880	0.012616966
870	0.01303881
870	0.015608222
860	0.01848443
850	0.008820371
840	0.020478601
830	0.021360638
820	0.007094646
820	0.00065194
810	0.00345145
800	0.011313085
790	0.020171805
780	0.03221353
770	0.015378125
770	0.012655315
760	0.008820371
750	0.019328118
740	0.007976684
730	0.01303881
720	0.032712072
710	0.017640742
710	0.014917932
700	0.009855806
690	0.008283479
680	0.024083448
670	0.024045099
670	0.018369382
660	0.022089277
650	0.024735389
640	0.030564504
630	0.013844148
620	0.022127627
620	0.015301427
610	0.018791226
600	0.016682006
590	0.025042184
580	0.032328578
570	0.019059672
570	0.018599478
560	0.013959196
550	0.023661605
540	0.029068876
530	0.022971315
520	0.029912563
510	0.022012579
500	0.022511121
490	0.034974689
480	0.023201411
470	0.015186378
470	0.020900445
460	0.020631999
450	0.019251419
440	0.014802884
430	0.021168891
420	0.025655775
410	0.01438104
400	0.023738303
390	0.029337322
380	0.019136371
370	0.038196042
370	0.029145574
360	0.024428593
350	0.03010431
340	0.01852278
330	0.021552385
320	0.024543642
310	0.021974229
300	0.018446081
290	0.018561129
280	0.022664519
270	0.02327811
270	0.023201411
260	0.019213069
250	0.019021322
240	0.012655315
230	0.016643657
220	0.016950453
210	0.024275196
200	0.015608222
190	0.018254333
180	0.017947538
170	0.018292683
170	0.017870839
160	0.014611137
150	0.016988802
140	0.01641356
130	0.016106765
120	0.020171805
110	0.016145114
100	0.018714527
90	0.013652401
80	0.01165823
70	0.012271821
60	0.013422304
70	0.014112594
60	0.023508207
50	0.014649486
40	0.025617426
30	0.035473232
20	0.034629544
10	0.058406197
0	0.090121184
