# Supplementary material for: Quantitative analysis of 1300-nm three-photon calcium imaging in the mouse brain
Source: eLife. 2020 Jan 30;9:e53205. doi: 10.7554/eLife.53205 (PMC7028383; doi:10.7554/eLife.53205)
Supplement: Figure 2—source data 1. [file elife-53205-fig2-data1.csv]

Depth (um)	3PM SBR Mean	3PM SBR SD	2PM SBR Mean	2PM SBR SD
0	110.8982615	4.193853494	85.758701	24.24481559
10	101.8072058	22.61907635	79.51380779	16.97509233
20	83.49911785	24.65947241	57.93089009	8.132317732
30	89.14182281	25.82463661	64.51491777	7.088946289
40	70.18466302	20.13164814	52.77307538	6.069284438
50	78.58142308	13.59519209	55.26220025	5.068251645
60	162.6186325	35.8319637	115.2538215	12.89128913
60	102.4996574	14.86628858	69.77643522	7.448220643
70	94.56805775	43.55019147	68.63965172	6.447341346
70	77.81017446	21.9805148	63.89241052	5.772151169
80	78.82992768	23.04059523	58.40076517	5.776042829
90	85.72779839	18.23276766	53.19272915	5.113516362
100	107.231536	28.16124792	75.97763278	8.70454287
110	97.55642733	20.27205601	74.71074238	7.178760228
120	90.33278812	24.1163239	69.93447247	7.535491237
130	83.18784831	21.51272936	60.66562497	6.554231815
140	124.3934299	28.381176	78.37969435	9.553114235
150	83.28001276	8.174992956	77.92161042	7.519329763
160	90.05311289	21.91149426	70.24151771	7.174727997
170	100.7801567	19.42274572	75.28096859	6.909412533
170	83.73468655	21.40797023	56.5506043	5.618702524
180	86.921035	24.64004256	82.20704955	7.016700955
190	87.44751778	14.82476395	84.54132004	8.727045898
200	92.85654159	11.35117473	75.87088117	7.460308951
210	85.16314448	22.22379472	69.48163312	8.478892059
220	84.25109324	16.49897276	62.54208529	5.646973863
230	73.54585052	16.36311928	54.49704277	5.778091464
240	72.02247541	15.14299751	58.92080681	5.846825849
250	62.81565277	11.08652301	55.8509088	5.872694164
260	66.5872232	11.65573849	54.00558775	5.919987913
270	106.6047102	25.49534714	70.96282893	7.384918284
270	62.5869681	26.09102441	54.66335544	5.156185294
280	111.484717	23.88108766	55.25147585	5.960091664
290	104.3211297	22.7301136	48.20556296	4.807222984
300	97.14789602	11.7111078	38.53724292	4.054354157
310	81.4523639	21.08230191	38.77262008	4.017988636
320	76.68740416	12.90039908	27.57416202	3.062825678
330	88.58299257	17.21667463	44.04169153	3.896180067
340	91.78168476	26.01443558	51.57171846	3.274646349
350	97.85266331	11.01877227	38.42338288	4.255384898
360	73.36448834	11.90871286	36.76379128	3.305847106
370	101.0271421	17.12718653	51.26013587	6.221863351
370	85.95837563	11.22153228	28.44901313	3.718189282
380	97.9749645	7.085620734	39.42751033	3.152160922
390	107.8817887	17.44726261	32.86550557	3.260827145
400	105.1518724	18.90951526	36.97477428	3.390665438
410	102.3111099	18.00162241	35.6722261	2.68025011
420	86.94435129	10.5898468	28.73182066	2.293440539
430	95.20180795	16.44891213	28.41849316	2.74870956
440	91.3426951	10.82769459	31.33104116	2.568125235
450	82.07610269	13.09391506	22.29638054	2.363326784
460	80.9119371	12.41761074	25.21257378	2.38279854
470	84.58164032	9.043138816	23.59885739	2.044838429
470	78.41432422	10.3632879	22.59628054	2.171004536
480	95.07655165	9.738068473	27.91829413	2.520451976
490	92.04998201	13.77449523	28.72493505	2.682942704
500	79.41534402	15.26907727	11.8049152	1.88847033
510	94.4956962	13.96010614	15.20152066	1.683668712
520	97.07647922	14.86051423	14.06813589	1.792681758
530	83.19431375	34.71267108	14.57199021	1.508045671
540	86.71173878	14.66052959	10.21938117	1.589351986
550	79.33803298	14.64390475	11.73953664	1.488512883
560	67.41032537	10.61737142	10.21748462	1.242988083
570	73.52480103	11.33171997	9.890363283	1.189812814
570	80.6037823	14.78726222	11.20214517	1.216444916
580	72.9620666	16.1875382	10.77016352	1.187652402
590	95.49367351	22.4984744	13.33062568	0.986413114
590	74.23546235	11.23689245	9.353912858	1.193143844
600	91.69270701	12.38861067	9.182464838	1.089771349
600	66.84313679	15.79410543	11.05037198	0.872513612
610	85.07039414	21.08451465	10.31323726	1.071474355
610	59.82571563	11.97475952	7.796368096	0.904322905
620	81.16101375	15.51434811	8.06229883	0.952877138
620	85.04367466	21.58441567	7.806223388	0.886503335
620	52.86496438	15.6919906	6.028327449	0.825079017
630	74.38523147	9.766222378	5.693732328	0.861963512
630	75.63773211	15.44630372	5.345131824	0.726098491
640	80.45934545	17.76169131	7.880476872	0.836700761
640	70.85494294	9.860184862	7.655397765	0.88721796
640	70.39509628	14.62106063	4.458766932	0.79516141
650	86.7208729	16.46847154	7.578004175	0.833679861
650	64.80787318	11.25542702	5.191076349	0.707723642
660	117.7000858	10.25739473	11.59083462	0.920543707
660	65.27580822	18.77421424	5.53156611	0.746310968
670	84.23947923	7.821510592	9.101092528	0.910223599
670	104.1321037	9.059338513	8.836455617	0.885280189
670	82.38503186	10.78379812	7.840659638	0.803358126
680	53.78720483	8.283686528	3.827999933	0.472558469
680	78.33172854	17.29285811	6.952270196	0.674918072
690	66.60451082	18.21023407	3.457941361	0.442985287
690	53.96316331	19.15933093	1.882754942	0.439819043
690	56.80569434	13.50775305	2.274753479	0.460986599
700	66.1062233	11.18448643	3.747533307	0.455859422
700	47.4138035	15.65477291	2.015010051	0.450003853
710	75.3753589	13.74376978	2.156757718	0.503014831
710	65.35529115	8.736119186	2.363491709	0.449655776
710	53.67564306	8.840010025	2.851702594	0.453383231
720	56.0254957	6.531905011	1.693112595	0.459585901
720	69.85239247	16.01539687	1.3120074	0.470784911
730	48.77496621	10.51931528	1.601680857	0.443991419
730	46.4450377	7.179476556	1.508600265	0.45972805
740	41.32210559	12.0835028	1.407971083	0.440373327
750	39.1240612	8.44918596	0.813781337	0.440509
760	32.52689989	7.000246268	0.637757563	0.457861124
770	56.34173716	12.3286467	0.821059505	0.473513849
770	32.87010219	7.680646142	0.906857319	0.468570297
780	46.64280159	7.706269812	0.303882995	0.472513991
790	32.68089607	6.52970869
800	21.37646781	4.453846333
810	14.74314995	5.366710629
820	14.67840685	8.123960698
820	8.830964793	5.850278447
830	22.5383409	5.057621692
840	16.24937195	4.545178709
850	11.85179891	4.061216981
860	12.25777362	3.891978221
870	20.84252973	5.057585958
870	6.749350007	2.68189142
880	21.47422257	5.885400191
890	19.67310904	4.816902709
900	16.75402472	4.949273692
910	26.97124575	5.249333324
910	13.35776921	3.223698463
920	26.47868552	3.5893427
930	21.12586529	3.750741357
940	17.39266343	3.522046068
950	13.51156993	3.080779009
960	11.91188183	2.237295561
970	14.52947081	2.818385769
970	11.85041278	1.90272775
980	15.26339996	2.348999155
990	14.5129986	2.421204319
1000	11.82361097	2.668439271
1010	6.780360995	2.648100769
1010	6.485667782	1.852235953
1020	6.897075222	2.150636283
1030	6.267084774	1.783281704
1040	3.998549254	1.486967706
1050	4.848973915	1.693774403
1060	5.214057559	1.631630176
