# Supplementary material for: Quantitative analysis of 1300-nm three-photon calcium imaging in the mouse brain
Source: eLife. 2020 Jan 30;9:e53205. doi: 10.7554/eLife.53205 (PMC7028383; doi:10.7554/eLife.53205)
Supplement: Figure 2—source data 2. [file elife-53205-fig2-data2.csv]

Depth (um)	3PM SBR Mean	3PM SBR SD	2PM SBR Mean	2PM SBR SD
445	167	24.4	15.8	2.75
545	219	37.5	5.86	1.12
645	148	22.1	1.16	0.21
745	55	17.8	0.25	0.24
