# Supplementary material for: Quantitative analysis of 1300-nm three-photon calcium imaging in the mouse brain
Source: eLife. 2020 Jan 30;9:e53205. doi: 10.7554/eLife.53205 (PMC7028383; doi:10.7554/eLife.53205)
Supplement: Figure 2—source data 3. [file elife-53205-fig2-data3.csv]

Time(s)	Trace 1	Trace 2	Trace 3	Trace 4	Trace 5	Trace 6	Trace 7	Trace 8	Trace 9	Trace 10	Trace 11	Trace 12	Trace 13	Trace 14	Trace 15	Trace 16	Trace 17	Trace 18	Trace 19	Trace 20	Trace 21	Trace 22	Trace 23	Trace 24	Trace 25	Trace 26	Trace 27	Trace 28	Trace 29	Trace 30	Trace 31	Trace 32	Trace 33	Trace 34	Trace 35	Trace 36	Trace 37	Trace 38	Trace 39	Trace 40	Trace 41	Trace 42	Trace 43	Trace 44	Trace 45	Trace 46	Trace 47	Trace 48	Trace 49
0	-0.27759	-0.29342	-0.091237	-0.27462	-0.24319	-0.27371	0.20726	-0.16229	-0.039051	-0.197	-0.29528	-0.24632	-0.035245	-0.21651	-0.22629	-0.13821	-0.28186	-0.19755	-0.14342	-0.32165	-0.27399	1.2394	-0.10928	-0.2133	-0.072378	-0.098458	-0.16146	0.060991	-0.38112	0.69389	0.39328	-0.16609	0.58802	0.14612	0.254	-0.28936	0.70253	-0.112	-0.2216	-0.11146	-0.10456	-0.22447	-0.23948	-0.14536	0.12384	0.31516	0.21062	0.081861	0.30967
0.072150072	-0.034684	-0.076567	0.1679	0.0074131	-0.015074	-0.059556	0.61849	0.17731	0.31178	0.127	-0.033003	0.055688	0.27121	0.011805	0.032191	0.14745	-0.017411	0.056863	0.10367	-0.08167	-0.044727	1.8764	0.15185	0.0087411	0.21123	0.16535	0.084224	0.43935	-0.1812	1.2108	0.9078	0.1005	1.1361	0.55937	0.66111	-0.049258	1.2232	0.17342	0.023969	0.16368	0.20943	0.067715	0.070157	0.13729	0.46733	0.85006	0.63473	0.4192	0.68779
0.144300144	0.0051366	-0.068681	0.16264	0.049433	0.005392	-0.039892	0.72034	0.26096	0.38941	0.25609	0.028574	0.21078	0.30027	0.06108	0.074608	0.16648	0.0237	0.087959	0.11585	-0.05539	-0.017303	1.9139	0.16971	0.014567	0.2218	0.20333	0.10149	0.5148	-0.15047	1.0717	0.88397	0.16032	1.2255	0.6605	0.69185	-0.01022	1.2924	0.21254	0.05046	0.16899	0.28952	0.10817	0.19485	0.15052	0.52616	1.0079	0.70209	0.50111	0.72198
0.216450216	0.0065185	-0.06905	0.1664	0.0056041	-0.015943	-0.030939	0.82034	0.27478	0.43074	0.3119	0.026218	0.3861	0.30376	0.087805	0.085493	0.15211	0.026222	0.072899	0.10256	-0.069968	-0.031471	1.8588	0.14283	-0.0046287	0.18111	0.21361	0.095215	0.48031	-0.13086	1.0308	0.79059	0.13629	1.1581	0.65266	0.63845	0.021859	1.2964	0.22555	0.014192	0.13899	0.29082	0.12338	0.22589	0.12379	0.55194	1.0654	0.67795	0.5468	0.71356
0.288600289	0.011733	-0.046587	0.18423	-0.0020261	-0.030355	-0.0058703	0.89986	0.31582	0.49637	0.31635	0.03888	0.59744	0.32022	0.10063	0.088325	0.15416	0.039518	0.066935	0.099094	-0.059534	-0.058561	1.8298	0.12685	-0.018595	0.14799	0.22192	0.088884	0.41061	-0.11978	1.1029	0.73698	0.12838	1.0067	0.61346	0.60115	0.10806	1.2237	0.21709	0.006709	0.14425	0.2435	0.15622	0.22527	0.11631	0.56186	1.1974	0.62359	0.51908	0.71579
0.360750361	0.026919	-0.016928	0.15242	-0.0032005	-0.027381	0.030533	0.9618	0.37575	0.57994	0.31123	0.052263	0.7196	0.28722	0.10628	0.096185	0.14479	0.037584	0.060167	0.086313	-0.060553	-0.067828	1.7654	0.11859	-0.037936	0.15455	0.21039	0.077986	0.37831	-0.097187	1.2107	0.70966	0.11802	0.92267	0.59456	0.59151	0.26847	1.1143	0.18319	0.023656	0.15829	0.22345	0.18874	0.2321	0.12944	0.56543	1.32	0.59505	0.48313	0.72031
0.432900433	0.026223	0.0015249	0.13682	0.0068187	-0.0038043	0.03908	0.96687	0.39153	0.63545	0.28892	0.0723	0.7636	0.24934	0.091294	0.10872	0.1429	0.025144	0.047618	0.056983	-0.086321	-0.070639	1.5817	0.1141	-0.038167	0.18469	0.21725	0.066306	0.36418	-0.077042	1.2125	0.72957	0.10349	0.97169	0.57604	0.59586	0.4168	1.076	0.18047	0.032614	0.17012	0.245	0.20031	0.23173	0.12171	0.6068	1.2933	0.60052	0.48224	0.69804
0.505050505	-0.0089923	0.0029724	0.16004	0.025296	0.0018966	0.027317	0.88756	0.36296	0.64479	0.2831	0.091185	0.7919	0.23679	0.071468	0.08266	0.11351	0.012133	0.035812	0.057846	-0.08092	-0.079892	1.4264	0.1451	-0.013922	0.22024	0.29218	0.077863	0.30949	-0.07547	1.1488	0.82106	0.076367	1.0396	0.53425	0.57787	0.47292	1.0799	0.22635	0.040098	0.15555	0.23022	0.18897	0.22746	0.12875	0.61467	1.2168	0.57936	0.50979	0.71704
0.577200577	-0.023664	-0.020054	0.16583	0.028447	0.017204	0.020849	0.81581	0.3476	0.62946	0.29361	0.10271	0.79186	0.22913	0.070109	0.05671	0.086162	-0.012319	0.024891	0.10857	-0.062663	-0.080597	1.35	0.19463	0.01249	0.2393	0.42107	0.11242	0.25331	-0.059216	1.0788	0.8601	0.083086	1.0545	0.46051	0.54422	0.46806	1.0569	0.27389	0.042473	0.13389	0.23404	0.18913	0.24143	0.15861	0.55179	1.251	0.55628	0.49378	0.71447
0.649350649	-0.034444	-0.042361	0.14695	0.01098	0.030747	0.009265	0.821	0.34151	0.58681	0.28522	0.093013	0.79476	0.20741	0.058068	0.050042	0.068547	-0.03747	0.036432	0.14315	-0.084398	-0.068649	1.3646	0.22573	0.031687	0.24605	0.61427	0.15172	0.25674	-0.062242	1.0499	0.79318	0.10006	1.0465	0.41904	0.50649	0.48383	1.0138	0.29828	0.062022	0.11624	0.26127	0.20412	0.26787	0.21709	0.44973	1.2699	0.54856	0.43959	0.64086
0.721500722	-0.051663	-0.048478	0.17068	-0.016483	0.02448	0.0081349	0.80511	0.34049	0.58424	0.26325	0.054869	0.83782	0.20385	0.035793	0.026136	0.072115	-0.026982	0.051127	0.14689	-0.11451	-0.067802	1.3641	0.22624	0.054944	0.26345	0.84045	0.17684	0.32881	-0.086924	1.0215	0.77736	0.12108	1.0108	0.39549	0.48539	0.50233	1.0557	0.30314	0.10653	0.10533	0.23599	0.18022	0.2657	0.32343	0.40958	1.1829	0.53872	0.38914	0.5786
0.793650794	-0.052073	-0.031748	0.19926	-0.0022612	0.032272	0.02297	0.75514	0.30201	0.62483	0.22755	0.035228	0.82108	0.2164	0.028013	0.0279	0.088356	-0.0024616	0.050046	0.13733	-0.10829	-0.072165	1.3084	0.22869	0.080211	0.27773	1.0075	0.1843	0.39807	-0.10833	0.96967	0.7935	0.12751	0.99138	0.36667	0.46336	0.47541	1.2041	0.27735	0.13152	0.096518	0.23318	0.1599	0.22593	0.40711	0.45843	1.0677	0.51039	0.38631	0.58141
0.865800866	-0.0018066	-0.025345	0.15725	0.03255	0.019081	0.01179	0.71762	0.25643	0.62935	0.19356	0.044841	0.76946	0.22005	0.022472	0.0606	0.075475	-0.0047048	0.03223	0.14625	-0.095727	-0.066146	1.2764	0.28653	0.07424	0.28067	1.1558	0.2143	0.48431	-0.12311	0.97258	0.77605	0.12285	0.96618	0.34347	0.45842	0.44477	1.338	0.22852	0.10741	0.10755	0.22276	0.17346	0.19615	0.43484	0.48079	0.99564	0.48942	0.39747	0.53101
0.937950938	0.047709	-0.0438	0.11612	0.046699	-0.0027145	-0.0011457	0.694	0.26496	0.58358	0.19154	0.057088	0.74411	0.23203	0.023576	0.07783	0.069706	-0.013387	0.041482	0.17494	-0.087009	-0.04081	1.2403	0.43949	0.079438	0.27688	1.2038	0.25045	0.60288	-0.12596	0.99628	0.73667	0.15646	0.95443	0.31847	0.46662	0.41558	1.3795	0.20381	0.072961	0.1179	0.15139	0.1894	0.2164	0.49684	0.42918	1.0008	0.49467	0.41806	0.48298
1.01010101	0.074447	-0.037258	0.083182	0.050443	-0.00023364	0.030142	0.66761	0.28197	0.56268	0.19731	0.063275	0.74375	0.24442	0.048364	0.074827	0.07906	-0.017069	0.071631	0.20699	-0.063732	-0.012565	1.1921	0.66131	0.091668	0.27288	1.1276	0.25111	0.67479	-0.13443	0.95218	0.7253	0.21083	0.97118	0.31758	0.45837	0.38864	1.4014	0.21313	0.055709	0.088148	0.1206	0.16075	0.22856	0.54874	0.44296	0.98002	0.52007	0.46265	0.5114
1.082251082	0.105	-0.0098004	0.043009	0.056032	0.0169	0.072473	0.65722	0.24722	0.5977	0.21128	0.054421	0.72534	0.2391	0.082311	0.075963	0.080554	-0.0029599	0.092974	0.22017	-0.031181	-0.027759	1.1303	0.77841	0.09179	0.27758	1.0682	0.24816	0.71402	-0.13194	0.8972	0.72461	0.24889	1.0742	0.33598	0.49682	0.38203	1.4256	0.21585	0.05854	0.055129	0.11772	0.1221	0.26287	0.55836	0.51794	0.87619	0.54345	0.45222	0.54561
1.154401154	0.10841	-0.00071338	0.046188	0.050053	0.023561	0.064804	0.70798	0.23055	0.6252	0.22929	0.047054	0.7045	0.24613	0.10083	0.083414	0.049968	0.040738	0.10525	0.19589	-0.023129	-0.048074	1.111	0.78437	0.09272	0.28785	1.0619	0.27087	0.78941	-0.10652	0.89605	0.68197	0.25734	1.2154	0.32574	0.5451	0.40943	1.3919	0.19834	0.089869	0.046849	0.096407	0.12993	0.31592	0.56454	0.52681	0.81602	0.54787	0.42773	0.48931
1.226551227	0.11124	0.023995	0.08871	0.058425	0.021131	0.035439	0.76586	0.23758	0.60776	0.22688	0.049135	0.70494	0.25022	0.076165	0.097131	0.027731	0.052131	0.097384	0.16503	-0.036227	-0.05002	1.07	0.76135	0.10325	0.30931	1.0653	0.29572	0.85348	-0.10244	0.94187	0.63461	0.24925	1.2853	0.31416	0.56696	0.49156	1.333	0.18259	0.092059	0.033058	0.12855	0.12377	0.38328	0.59405	0.51081	0.86166	0.53477	0.38426	0.39565
1.298701299	0.11321	0.068415	0.15018	0.080429	0.036429	0.029629	0.77921	0.23173	0.5559	0.21889	0.057606	0.66515	0.24455	0.030149	0.083246	0.029398	0.044548	0.080733	0.15058	-0.040623	-0.038012	0.9751	0.73266	0.081322	0.32919	1.0433	0.29573	0.93052	-0.10988	1.0237	0.61758	0.25882	1.2965	0.31262	0.5957	0.56821	1.2968	0.21013	0.042834	0.029659	0.14226	0.079362	0.39978	0.64326	0.52027	0.87666	0.50228	0.35252	0.36791
1.370851371	0.13505	0.079006	0.16714	0.096408	0.044565	0.051707	0.7607	0.22591	0.53335	0.23612	0.046301	0.60319	0.24804	0.02111	0.050948	0.035475	0.026788	0.061745	0.14552	-0.034812	-0.0085546	0.90207	0.68988	0.040691	0.33689	1	0.25083	0.92464	-0.10377	1.0859	0.63641	0.29684	1.2868	0.28247	0.61237	0.58091	1.3125	0.27264	0.018284	0.015333	0.077764	0.060503	0.37608	0.65336	0.52039	0.88937	0.49593	0.33384	0.37347
1.443001443	0.1338	0.059108	0.13664	0.085154	0.029427	0.04041	0.74173	0.2262	0.55728	0.22667	0.024583	0.55749	0.24683	0.036988	0.049355	0.04218	0.0035276	0.049535	0.14674	-0.033853	0.010576	0.8588	0.64843	0.026138	0.33117	0.94952	0.21002	0.85968	-0.1091	1.066	0.65236	0.34763	1.2468	0.25368	0.61728	0.57067	1.3922	0.29171	0.014581	-0.0099476	0.062026	0.065089	0.38686	0.6114	0.51037	1.0123	0.49807	0.30443	0.33728
1.515151515	0.12665	0.040265	0.11663	0.090265	0.018094	-0.00075327	0.71365	0.23684	0.51348	0.18489	0.021183	0.52142	0.23812	0.050052	0.06521	0.047908	0.005914	0.043878	0.1636	-0.019946	0.021539	0.83482	0.641	0.046215	0.31862	0.93897	0.18868	0.83441	-0.093065	0.99008	0.63914	0.38429	1.1821	0.2718	0.64059	0.62223	1.4923	0.29171	0.035521	-0.00079052	0.10627	0.063278	0.41405	0.58472	0.52608	1.1765	0.42517	0.2767	0.28884
1.587301587	0.12716	0.030241	0.099546	0.095295	0.025485	-0.013845	0.68227	0.25828	0.44908	0.14314	0.028743	0.48981	0.23579	0.074649	0.057037	0.053867	0.001011	0.046882	0.16435	-0.0040788	0.025085	0.85356	0.65225	0.084536	0.3137	0.90135	0.1587	0.84118	-0.081892	0.92689	0.59991	0.38791	1.0801	0.27897	0.66482	0.79499	1.5831	0.30891	0.056074	0.015808	0.11336	0.030554	0.39071	0.56106	0.54293	1.2112	0.38302	0.2443	0.29148
1.659451659	0.13995	0.026998	0.096357	0.084112	0.05717	-0.021769	0.65457	0.24854	0.43122	0.092672	0.025545	0.46772	0.2266	0.090262	0.03974	0.07225	-0.0069295	0.04168	0.1755	-0.021537	0.030042	0.89256	0.6587	0.1099	0.32916	0.87129	0.16592	0.81464	-0.080486	0.89183	0.57903	0.37508	0.99046	0.27145	0.64909	1.0044	1.6563	0.32318	0.078356	-0.0099265	0.12464	0.021119	0.31546	0.49238	0.53248	1.1279	0.39594	0.23719	0.31043
1.731601732	0.1385	0.035679	0.093679	0.054182	0.054044	-0.052689	0.62809	0.24256	0.44049	0.086701	0.02786	0.43298	0.21338	0.069156	0.030428	0.097107	0.007061	0.025736	0.16379	-0.032172	0.035762	0.93018	0.66991	0.11382	0.36452	0.92453	0.22494	0.80491	-0.064399	0.87415	0.60433	0.38302	0.96883	0.2665	0.60999	1.133	1.6717	0.30604	0.11161	-0.0196	0.13986	0.039186	0.28881	0.46475	0.49792	1.1002	0.41039	0.24545	0.26503
1.803751804	0.12116	0.056689	0.082348	0.059644	0.027972	-0.047787	0.57101	0.23653	0.45719	0.11225	0.031806	0.40586	0.21276	0.05107	0.031176	0.13064	0.012989	0.06499	0.14446	-0.019904	0.03549	0.96567	0.70506	0.11759	0.37928	0.95465	0.27283	0.80865	-0.021053	0.84786	0.60844	0.40761	0.95226	0.2565	0.59214	1.1805	1.6257	0.27915	0.10943	0.0039088	0.14116	0.0068724	0.34965	0.51062	0.4477	1.0756	0.42084	0.28157	0.2417
1.875901876	0.13097	0.035818	0.04299	0.070019	0.044732	-0.0035515	0.52936	0.23226	0.42932	0.097112	0.035509	0.40244	0.21048	0.047184	0.051377	0.14901	0.016289	0.1003	0.14521	-0.021179	0.044313	0.95758	0.73316	0.11549	0.37722	0.98231	0.27648	0.74701	0.0061699	0.79578	0.53412	0.41428	0.90506	0.24427	0.57421	1.1919	1.6351	0.27205	0.078938	0.054492	0.10858	-0.0052785	0.41006	0.55955	0.419	0.96147	0.42234	0.29731	0.23698
1.948051948	0.14869	0.026566	4.76E-05	0.057343	0.044524	0.0069387	0.53499	0.21575	0.37192	0.09348	0.044125	0.39601	0.21349	0.04932	0.069186	0.14325	0.043952	0.10258	0.15984	-0.02071	0.067076	0.91286	0.70384	0.14498	0.37362	0.97721	0.23668	0.66702	0.0052562	0.76421	0.46536	0.4006	0.8523	0.23771	0.54461	1.1624	1.6665	0.238	0.052283	0.12381	0.07974	0.029704	0.3479	0.58607	0.40466	0.87561	0.41449	0.25881	0.20698
2.02020202	0.12624	0.034675	-0.0052433	0.052652	0.042721	0.0064124	0.56509	0.1874	0.34232	0.13592	0.060101	0.36648	0.19969	0.048637	0.064191	0.19417	0.078943	0.11616	0.18009	0.015985	0.065662	0.9008	0.66243	0.18345	0.3602	0.91983	0.19553	0.6136	-0.00057373	0.76164	0.4789	0.38415	0.76672	0.20963	0.50949	1.1137	1.6076	0.21538	0.053339	0.17211	0.092272	0.045232	0.27335	0.59569	0.4073	0.89939	0.4316	0.22047	0.17104
2.092352092	0.072785	0.040252	-0.0071945	0.070354	0.10272	0.049963	0.54039	0.16747	0.34263	0.13904	0.06576	0.32709	0.17233	0.062586	0.059304	0.40074	0.08769	0.1164	0.14193	0.024777	0.071947	0.89403	0.63167	0.20471	0.35643	0.87446	0.17542	0.56798	0.012215	0.7241	0.52269	0.37774	0.73578	0.16743	0.47197	1.1632	1.4977	0.18926	0.077913	0.19419	0.11263	0.012305	0.29627	0.61108	0.39974	0.88675	0.44296	0.2507	0.19277
2.164502165	0.051313	0.035287	-0.020857	0.065151	0.13647	0.057822	0.494	0.17017	0.32322	0.12567	0.062249	0.3058	0.14186	0.093738	0.057273	0.7202	0.084453	0.1134	0.1012	0.012729	0.062316	0.80612	0.57801	0.19996	0.37139	0.86335	0.16786	0.5319	0.026483	0.65502	0.48285	0.38658	0.72645	0.15656	0.42605	1.3588	1.4467	0.17097	0.084068	0.19712	0.098453	0.0036454	0.36752	0.61404	0.38958	0.80203	0.44737	0.25961	0.23816
2.236652237	0.052993	0.029571	-0.01918	0.050566	0.12589	0.018685	0.49622	0.17208	0.29373	0.10517	0.055128	0.286	0.11755	0.10342	0.060737	0.98555	0.0626	0.10022	0.083711	0.032925	0.03496	0.7017	0.50658	0.17604	0.41023	0.84886	0.16968	0.50991	0.01521	0.65642	0.40121	0.39757	0.68058	0.1495	0.37701	1.567	1.4287	0.14702	0.067596	0.1743	0.081953	0.02151	0.36453	0.59681	0.36333	0.74778	0.43373	0.18733	0.23107
2.308802309	0.09061	0.026056	-0.0072444	0.073077	0.10834	0.0045982	0.495	0.16406	0.27412	0.088113	0.043789	0.24219	0.13122	0.086244	0.073542	1.0927	0.050962	0.0791	0.10681	0.053564	0.032194	0.62371	0.45055	0.1636	0.45225	0.80484	0.1741	0.48711	0.00042894	0.6758	0.3646	0.40327	0.62072	0.12339	0.34481	1.667	1.3733	0.10228	0.084166	0.13437	0.065892	0.041322	0.33889	0.56653	0.30225	0.76516	0.3557	0.11946	0.19631
2.380952381	0.18926	0.025147	0.033721	0.098147	0.073278	0.025122	0.47157	0.13839	0.2633	0.071498	0.033518	0.20445	0.16281	0.072353	0.065858	1.1288	0.10157	0.055965	0.14339	0.065723	0.040481	0.58098	0.42701	0.14199	0.46262	0.78287	0.15764	0.45618	0.026381	0.65499	0.37432	0.40314	0.53847	0.098358	0.31705	1.6801	1.2766	0.073764	0.07091	0.10995	0.081754	0.030124	0.36827	0.584	0.26759	0.74354	0.26074	0.1223	0.20747
2.453102453	0.25664	0.041282	0.030975	0.068608	0.015473	0.010937	0.43742	0.12015	0.28913	0.052839	0.015528	0.20124	0.17316	0.078333	0.041987	1.1754	0.17919	0.037227	0.1239	0.070338	0.052072	0.59088	0.44536	0.10783	0.46199	0.69129	0.10345	0.43554	0.063778	0.60432	0.37921	0.37832	0.47775	0.090925	0.29201	1.6817	1.1944	0.092711	0.028667	0.11924	0.12593	-0.009798	0.34712	0.64208	0.25571	0.6526	0.23424	0.14168	0.23143
2.525252525	0.28036	0.04645	0.01008	0.032068	0.014092	-0.019424	0.40375	0.10169	0.33443	0.023532	-0.0011639	0.1825	0.19102	0.085234	0.029938	1.1843	0.21607	0.0010693	0.090103	0.038036	0.060528	0.59555	0.48793	0.08892	0.45543	0.60133	0.065524	0.45084	0.079721	0.55221	0.3753	0.3404	0.42739	0.093533	0.26652	1.6844	1.1237	0.13139	0.028008	0.12799	0.14519	-0.021039	0.30075	0.66373	0.25625	0.59452	0.21893	0.12274	0.24674
2.597402597	0.32573	0.040324	0.0033029	0.0096237	0.029514	-0.0074998	0.39687	0.06859	0.35488	0.028946	-0.021718	0.17781	0.23128	0.07666	0.044315	1.1763	0.20621	-0.015542	0.061719	0.0032159	0.050968	0.57287	0.53276	0.081792	0.43583	0.58036	0.067992	0.51177	0.080387	0.53559	0.39745	0.31246	0.40021	0.091138	0.23359	1.6249	1.059	0.12373	0.025122	0.10701	0.14898	0.004648	0.2916	0.66756	0.23675	0.61244	0.18823	0.12939	0.24354
2.66955267	0.37042	0.03709	0.016048	0.012924	0.0085859	0.0090849	0.39753	0.071878	0.35807	0.063384	-0.024189	0.19777	0.23694	0.055829	0.035535	1.132	0.22892	0.038935	0.049963	-0.0067926	0.029835	0.56124	0.57116	0.065144	0.4419	0.55923	0.094359	0.54045	0.090678	0.53641	0.4386	0.32037	0.3676	0.08611	0.20526	1.5521	0.9735	0.07312	0.01336	0.10527	0.12055	-0.0017054	0.30072	0.66894	0.22915	0.64609	0.19283	0.17919	0.26615
2.741702742	0.36068	0.029549	0.0243	0.026647	-0.028649	0.0081955	0.37833	0.091252	0.34119	0.075427	-0.0022163	0.20028	0.20447	0.044544	0.0099993	1.0778	0.44987	0.062731	0.038499	-0.014497	-0.002167	0.57308	0.59202	0.044842	0.44937	0.53655	0.10742	0.51789	0.095246	0.53856	0.46292	0.33639	0.33402	0.087804	0.18113	1.4977	0.91729	0.039984	0.022139	0.12939	0.080807	-0.022381	0.32788	0.65786	0.23575	0.61803	0.21015	0.15185	0.32913
2.813852814	0.35288	-0.019932	0.0075281	0.023074	-0.050063	-0.0071036	0.36907	0.11388	0.31006	0.067462	0.0037088	0.18162	0.16469	0.052047	0.014225	1.0633	0.89136	0.063531	0.020927	-0.01089	-0.026573	0.56376	0.5616	0.0070576	0.42743	0.52689	0.10151	0.49472	0.089343	0.55071	0.45208	0.34523	0.31423	0.083667	0.18367	1.4124	0.89853	0.057331	0.02014	0.1202	0.044723	-0.010308	0.37027	0.63342	0.22279	0.56007	0.27943	0.10359	0.3573
2.886002886	0.36324	-0.024874	-0.002595	0.0071159	-0.03574	-0.032674	0.35971	0.1284	0.28321	0.070325	0.0063485	0.16626	0.13701	0.057056	0.031594	1.0045	1.2106	0.066994	0.025995	0.023376	-0.013048	0.53212	0.47219	-0.017291	0.39466	0.53905	0.10604	0.48281	0.10719	0.56646	0.42249	0.34141	0.28504	0.062454	0.20201	1.3005	0.88804	0.060185	0.036909	0.096467	0.0079704	0.033408	0.37894	0.59999	0.20122	0.55134	0.45664	0.12711	0.34675
2.958152958	0.36194	0.014875	-0.005359	-0.00079677	0.0045609	-0.048232	0.33848	0.11504	0.31288	0.08136	0.018487	0.14307	0.11209	0.063122	0.032145	0.93278	1.2636	0.054021	0.037526	0.053191	0.0022464	0.50606	0.39961	-0.037732	0.37297	0.52569	0.09087	0.48349	0.1251	0.55133	0.40025	0.33276	0.27127	0.047843	0.21393	1.236	0.86562	0.042044	0.075882	0.10878	0.0068565	0.044498	0.39247	0.58622	0.20319	0.48644	0.59486	0.18256	0.327
3.03030303	0.33126	0.022732	0.010268	-0.0083468	0.01149	-0.018047	0.31086	0.1141	0.3854	0.11005	-0.011317	0.10783	0.12043	0.065785	0.02366	0.90352	1.1943	0.043909	0.04208	0.076184	0.015343	0.48311	0.37189	-0.058462	0.38603	0.46711	0.076758	0.4518	0.13747	0.53742	0.38784	0.28917	0.2502	0.047467	0.20266	1.2178	0.81747	0.027898	0.10852	0.10672	0.045239	0.037982	0.39821	0.57338	0.2053	0.41426	0.61785	0.19502	0.3014
3.102453102	0.29566	0.030232	0.028096	-0.0081791	0.016838	0.026843	0.27588	0.11074	0.44644	0.12144	-0.039375	0.0842	0.14236	0.068122	0.013677	0.90031	1.1025	0.05265	0.051555	0.060981	0.0075443	0.49662	0.36144	-0.063048	0.4138	0.40806	0.088831	0.46296	0.13854	0.52372	0.38679	0.25393	0.24302	0.051695	0.18158	1.1661	0.81024	0.017878	0.10711	0.055383	0.081452	0.051249	0.36135	0.51819	0.16641	0.38146	0.65129	0.17846	0.27669
3.174603175	0.27406	0.056151	0.044676	0.014761	0.033517	0.050421	0.27791	0.10119	0.4572	0.13045	-0.036203	0.099065	0.16271	0.052876	0.018472	0.872	1.0764	0.054043	0.05912	0.040104	-0.0038337	0.52737	0.36611	-0.042722	0.42126	0.38467	0.10371	0.51162	0.12229	0.50517	0.36301	0.25404	0.26066	0.035987	0.16698	1.0631	0.79403	0.0036254	0.10016	0.020336	0.072281	0.053899	0.31092	0.46376	0.1203	0.37706	0.65203	0.17298	0.27237
3.246753247	0.27265	0.055469	0.029689	0.035319	0.037126	0.036345	0.28639	0.08902	0.40498	0.12514	-0.018798	0.13243	0.15506	0.052942	0.037136	0.84136	1.0628	0.022837	0.063895	0.031226	-0.0085208	0.53789	0.37054	-0.028837	0.4265	0.42976	0.12664	0.51357	0.10918	0.52939	0.33092	0.24681	0.29732	0.013479	0.17811	0.98979	0.7369	-0.0077635	0.11295	0.011596	0.030313	0.043703	0.23974	0.47747	0.068643	0.35181	0.57466	0.17671	0.29401
3.318903319	0.2941	0.02779	0.0083505	0.013345	0.049591	0.021547	0.27212	0.10263	0.36588	0.089014	-0.00016294	0.1226	0.12361	0.064277	0.036668	0.82862	1.0296	0.0032771	0.069559	0.024305	-0.016181	0.50526	0.34327	-0.027144	0.43034	0.4846	0.16361	0.46927	0.10395	0.54191	0.31943	0.20486	0.2897	0.0098592	0.21947	0.93177	0.67134	-0.02526	0.11317	-0.0074625	0.015408	0.069029	0.17134	0.48395	0.020718	0.34377	0.49482	0.15832	0.26403
3.391053391	0.28632	0.014063	0.018501	-0.025595	0.054638	0.0036124	0.26086	0.13377	0.35879	0.084863	0.019974	0.11742	0.088365	0.077989	0.030587	0.78117	0.99048	-0.0062133	0.092833	0.021325	-0.024362	0.45363	0.33307	-0.028934	0.41291	0.48233	0.18489	0.42792	0.10797	0.50057	0.31282	0.17396	0.25375	0.014056	0.27563	0.84559	0.62618	-0.018059	0.12319	-0.028913	0.055414	0.11849	0.18365	0.4615	0.0086673	0.36626	0.50127	0.13716	0.20386
3.463203463	0.26541	0.023326	0.055457	-0.042389	0.11085	-0.0098577	0.26846	0.13209	0.34648	0.081999	0.030593	0.1559	0.054576	0.094218	0.033473	0.73386	0.93354	-0.032746	0.081572	0.035823	-0.043407	0.44927	0.34889	-0.025151	0.38703	0.47177	0.18882	0.44573	0.1236	0.483	0.31364	0.16713	0.22634	0.0060275	0.3143	0.79247	0.60047	0.012316	0.1525	-0.024429	0.088684	0.12973	0.23918	0.4509	0.04191	0.41433	0.55293	0.14786	0.2044
3.535353535	0.24412	0.023895	0.086261	-0.0077287	0.25318	0.0012245	0.26241	0.11282	0.3493	0.087037	0.036209	0.176	0.03817	0.088806	0.043558	0.74109	0.88727	-0.023711	0.066339	0.049475	-0.056	0.4545	0.3783	0.0042143	0.3665	0.45252	0.16937	0.49659	0.10661	0.47962	0.31664	0.16571	0.20715	-0.010567	0.32745	0.76516	0.56075	0.048324	0.19097	-0.016694	0.069251	0.11918	0.27133	0.44474	0.069371	0.44465	0.58943	0.15256	0.23413
3.607503608	0.22368	0.031814	0.09199	0.031969	0.37879	0.0030665	0.25734	0.11456	0.33713	0.095692	0.043393	0.15951	0.040788	0.087752	0.049253	0.74387	0.84763	0.0098777	0.062538	0.069718	-0.022296	0.47963	0.39965	0.054589	0.35282	0.4027	0.13841	0.52929	0.088748	0.47866	0.3014	0.17098	0.18474	0.0016021	0.30091	0.7285	0.50511	0.073939	0.18719	-0.020741	0.030811	0.10091	0.24871	0.4602	0.044736	0.50842	0.57292	0.11774	0.26692
3.67965368	0.20365	0.029121	0.12286	0.057604	0.4228	-0.013432	0.26396	0.11907	0.31654	0.098439	0.058448	0.14861	0.053726	0.095228	0.05351	0.79654	0.82331	0.068473	0.064822	0.083991	0.013022	0.51404	0.3965	0.080532	0.34662	0.33663	0.11021	0.54075	0.076299	0.50228	0.27249	0.19398	0.18407	0.014099	0.25169	0.68437	0.49411	0.060391	0.16505	-0.021714	0.014658	0.080968	0.18749	0.48199	0.012843	0.63129	0.51792	0.073183	0.28726
3.751803752	0.19562	0.0077382	0.16055	0.074105	0.44675	-0.0069155	0.29558	0.10492	0.27488	0.083476	0.071471	0.14968	0.042403	0.089453	0.042511	0.92758	0.79104	0.091887	0.059008	0.051913	0.048122	0.46936	0.38658	0.062683	0.35348	0.31374	0.093292	0.53159	0.048609	0.50653	0.24328	0.20975	0.18022	0.027618	0.2159	0.6307	0.50591	0.031022	0.14656	-0.034183	0.003088	0.078275	0.16026	0.49584	0.0032311	0.68753	0.49622	0.051183	0.28879
3.823953824	0.17778	0.032205	0.19662	0.052638	0.41284	0.0092575	0.33018	0.091425	0.22322	0.085741	0.091262	0.16473	0.015373	0.094015	0.024459	0.96944	0.75464	0.073351	0.034142	0.029668	0.071339	0.40496	0.38817	0.028833	0.35898	0.32212	0.10568	0.50527	0.025373	0.49971	0.25995	0.20868	0.15403	0.035912	0.20041	0.56601	0.52418	0.0039279	0.12819	-0.057138	-0.052537	0.096019	0.15348	0.44608	-0.017258	0.6161	0.5015	0.088376	0.31279
3.896103896	0.16108	0.05442	0.20689	0.0057255	0.37748	0.023374	0.33713	0.085518	0.2006	0.11165	0.082846	0.159	0.0041366	0.10999	0.020218	0.92704	0.69212	0.076471	0.027799	0.032076	0.049622	0.39962	0.42268	-0.022623	0.35024	0.31023	0.11697	0.4628	0.0033975	0.48744	0.28331	0.20727	0.13933	0.054998	0.18922	0.49679	0.55945	0.011047	0.10433	-0.010726	-0.088896	0.096954	0.14523	0.40756	-0.048434	0.53815	0.46375	0.13919	0.29272
3.968253968	0.13334	0.041294	0.18167	-0.027461	0.37086	0.027998	0.32343	0.1048	0.2049	0.10228	0.059481	0.1398	0.027414	0.11992	0.047514	0.88008	0.6036	0.090077	0.048593	0.030698	0.018108	0.42255	0.475	-0.055613	0.35299	0.27093	0.11364	0.43954	-0.011857	0.46186	0.30007	0.19947	0.10687	0.083148	0.17679	0.46169	0.59557	0.0088187	0.062687	0.087257	-0.076327	0.048053	0.14015	0.40795	-0.082756	0.53858	0.40726	0.15935	0.25077
4.04040404	0.11265	0.033519	0.17165	-0.018358	0.35896	-0.001413	0.30422	0.11235	0.19991	0.090572	0.070149	0.11781	0.012135	0.11171	0.075388	0.84794	0.56805	0.09539	0.057159	0.039906	0.023827	0.44443	0.51211	-0.070004	0.34242	0.26428	0.10811	0.4422	-0.022266	0.48814	0.30265	0.19645	0.077755	0.1071	0.15109	0.45633	0.62785	-0.027397	0.043023	0.14182	-0.062869	-0.0014849	0.1668	0.39668	-0.087735	0.56672	0.38865	0.14445	0.27563
4.112554113	0.12238	0.046385	0.16237	-0.0066244	0.38478	-0.014613	0.27353	0.098633	0.20005	0.091293	0.088093	0.1107	-0.022231	0.094683	0.065762	0.79828	0.5414	0.085446	0.057593	0.041035	0.050271	0.44531	0.51111	-0.05735	0.31797	0.321	0.13718	0.43794	-0.034015	0.57339	0.25225	0.19726	0.058575	0.1086	0.14001	0.43398	0.6435	-0.042412	0.056409	0.15892	-0.049668	-0.01277	0.14306	0.39578	-0.07045	0.54457	0.34038	0.096773	0.28329
4.184704185	0.15761	0.08925	0.16044	-0.036736	0.37477	-0.01157	0.26036	0.075814	0.22912	0.090335	0.090412	0.11733	-0.019271	0.085627	0.040393	0.74365	0.51237	0.07106	0.078234	0.02074	0.053849	0.43648	0.47446	-0.04047	0.29269	0.38802	0.19195	0.42636	-0.046838	0.6734	0.19787	0.19871	0.029182	0.1087	0.15363	0.41942	0.63927	-0.046005	0.055395	0.15009	-0.0045684	-0.028845	0.08339	0.37912	-0.091469	0.55872	0.27786	0.070771	0.27776
4.256854257	0.21601	0.13779	0.22605	-0.0351	0.31769	-0.0070887	0.267	0.074437	0.24138	0.0691	0.078455	0.1179	-0.0048751	0.10638	0.02326	0.72891	0.49113	0.071556	0.063858	0.041718	0.041737	0.42175	0.43321	-0.047922	0.26788	0.43817	0.23798	0.4019	-0.022561	0.71529	0.21104	0.20623	0.027972	0.1113	0.16346	0.41854	0.62446	-0.039834	0.049363	0.12011	0.020681	-0.040878	0.085547	0.37074	-0.1478	0.57776	0.26622	0.10683	0.26585
4.329004329	0.26519	0.14708	0.37603	-0.0046209	0.26237	-0.012775	0.24786	0.069549	0.23598	0.048996	0.061675	0.087099	0.004868	0.13956	0.017726	0.73455	0.48056	0.11184	0.080285	0.079512	0.019815	0.36867	0.37462	-0.058468	0.28122	0.46207	0.27732	0.37003	0.025398	0.67227	0.24201	0.24953	0.036686	0.092067	0.18326	0.37199	0.58987	-0.023546	0.044282	0.092481	-0.024024	-0.038711	0.091217	0.36147	-0.15867	0.56455	0.33079	0.22588	0.2093
4.401154401	0.28354	0.12575	0.49683	0.029283	0.23334	0.0057702	0.23139	0.062271	0.20683	0.058528	0.062763	0.034361	0.029097	0.14162	0.0099502	0.72689	0.45907	0.13999	0.1113	0.070607	0.0070753	0.29711	0.31272	-0.044403	0.30751	0.47795	0.31763	0.37606	0.065106	0.63735	0.2457	0.33068	0.020765	0.084928	0.25728	0.31624	0.51992	-0.020669	0.02739	0.088183	-0.03937	-0.037581	0.077072	0.34997	-0.14	0.5308	0.37478	0.31718	0.16353
4.473304473	0.26826	0.11837	0.52619	0.047383	0.22051	0.013306	0.23534	0.080592	0.20554	0.060537	0.076559	0.02515	0.057281	0.10715	-0.0024041	0.69517	0.42154	0.10993	0.12331	0.029776	0.029688	0.2577	0.28505	-0.014619	0.31762	0.48834	0.31531	0.43128	0.083793	0.64464	0.22711	0.40754	0.021317	0.10898	0.40098	0.32293	0.44405	-0.015415	0.0056859	0.09728	-0.0047366	-0.07044	0.056056	0.38081	-0.1454	0.49343	0.38187	0.27759	0.17093
4.545454545	0.2376	0.11947	0.52444	0.052456	0.21769	-0.0040699	0.22948	0.10309	0.20886	0.035429	0.080248	0.042245	0.072233	0.074553	-0.0055705	0.66082	0.40446	0.071429	0.14194	0.012303	0.056543	0.28162	0.30308	0.011228	0.32411	0.43981	0.26928	0.50703	0.094374	0.64334	0.20564	0.42573	0.033903	0.1126	0.50093	0.3251	0.42342	0.0063806	-0.0084413	0.11319	0.052667	-0.12169	0.072469	0.43145	-0.16019	0.4404	0.36483	0.22999	0.21112
4.617604618	0.20623	0.12512	0.52871	0.02756	0.29663	-0.032643	0.21073	0.097355	0.17825	0.014027	0.07718	0.054316	0.067519	0.049375	-0.012879	0.6482	0.38597	0.073351	0.12099	0.014504	0.057688	0.30228	0.3085	0.033489	0.31929	0.38514	0.20794	0.52988	0.105	0.60942	0.21664	0.3792	0.0067733	0.099261	0.50663	0.29782	0.42196	0.019869	-0.02456	0.11054	0.065562	-0.11377	0.12849	0.48855	-0.16249	0.40383	0.34908	0.25081	0.23634
4.68975469	0.18298	0.1236	0.47118	0.01226	0.47646	-0.02546	0.19544	0.079738	0.15782	0.027993	0.060057	0.079261	0.09256	0.04341	-0.021102	0.66987	0.35045	0.13127	0.12063	-0.0047597	0.041386	0.29499	0.28935	0.055497	0.28525	0.37553	0.18302	0.53093	0.11119	0.57721	0.243	0.317	0.023075	0.13369	0.49919	0.26415	0.4038	0.0084072	-0.025443	0.095231	0.061243	-0.073626	0.12631	0.49702	-0.13726	0.39994	0.34564	0.29782	0.21516
4.761904762	0.17775	0.10611	0.35658	0.01687	0.70856	0.022337	0.21151	0.074425	0.15586	0.042941	0.062336	0.095502	0.11825	0.063516	0.0019969	0.71919	0.33258	0.16146	0.14466	-0.031331	0.02993	0.26783	0.23939	0.07401	0.26091	0.41862	0.22179	0.56918	0.075225	0.549	0.26572	0.28604	0.045317	0.24528	0.53389	0.24245	0.39301	-0.022957	-0.030924	0.095439	0.069877	-0.031518	0.065826	0.50951	-0.11876	0.39928	0.36297	0.29547	0.17818
4.834054834	0.20184	0.082493	0.29279	0.020817	0.86714	0.032187	0.23847	0.080858	0.1761	0.063637	0.076257	0.090629	0.11042	0.063406	0.011179	0.77271	0.30349	0.13259	0.12831	-0.024944	0.051663	0.25821	0.17348	0.084916	0.2502	0.5116	0.33138	0.58599	0.044637	0.5185	0.27385	0.27346	0.038227	0.34187	0.56279	0.23168	0.39446	-0.021297	-0.046667	0.061065	0.072261	-0.037644	0.039369	0.52978	-0.12389	0.40097	0.36213	0.23908	0.1341
4.906204906	0.24275	0.091971	0.27357	0.021129	0.9072	0.019199	0.25656	0.058806	0.18835	0.086836	0.066172	0.088683	0.098632	0.026225	-0.0051969	0.78478	0.29198	0.098889	0.090671	-0.027473	0.04962	0.28957	0.13084	0.088467	0.23029	0.5919	0.43238	0.55826	0.029518	0.49185	0.25697	0.25149	-0.00061816	0.35799	0.56724	0.20674	0.38472	0.0054282	-0.05723	0.025389	0.050492	-0.077172	0.064422	0.46896	-0.13877	0.38011	0.29536	0.23003	0.10851
4.978354978	0.29251	0.10642	0.24098	0.042125	0.89303	0.056302	0.30054	0.057822	0.16669	0.066516	0.058238	0.088569	0.090043	0.0018294	-0.016268	0.78261	0.32396	0.081628	0.10325	-0.052363	0.027732	0.2799	0.10081	0.094542	0.23356	0.59552	0.44906	0.51264	0.028145	0.48003	0.21687	0.23209	-0.028499	0.36172	0.57057	0.1702	0.35929	0.014328	-0.057437	0.022335	0.04389	-0.067567	0.10642	0.38513	-0.13626	0.3476	0.23818	0.21138	0.12223
5.050505051	0.34895	0.09613	0.18227	0.041649	0.8983	0.15206	0.32898	0.095233	0.12531	0.040901	0.054008	0.075092	0.072778	-0.013981	-0.020248	0.76096	0.32748	0.07453	0.13386	-0.061053	0.027762	0.26401	0.097575	0.11918	0.25624	0.54102	0.41209	0.45858	-0.016129	0.49117	0.18016	0.20696	-0.02728	0.38588	0.57123	0.16451	0.33078	-0.019465	-0.047828	0.039289	0.059754	-0.052564	0.099989	0.4231	-0.11372	0.36089	0.23194	0.19609	0.14278
5.122655123	0.35388	0.036507	0.17256	0.03229	0.92084	0.28405	0.32206	0.094213	0.11088	0.054286	0.03794	0.059492	0.048767	-0.033443	-0.027887	0.71582	0.29351	0.077536	0.13225	-0.051708	0.025944	0.27141	0.11488	0.17269	0.2732	0.47605	0.37267	0.40922	-0.049805	0.49659	0.19794	0.19847	-0.027545	0.39816	0.55487	0.17778	0.31715	-0.043966	-0.02858	0.044226	0.047933	-0.06643	0.080147	0.53172	-0.095185	0.42826	0.24235	0.17413	0.1298
5.194805195	0.31429	-0.0028258	0.16298	0.054386	0.93051	0.35714	0.29678	0.068657	0.11632	0.084218	0.046707	0.047673	0.029785	-0.038552	-0.036399	0.67279	0.23135	0.065627	0.10418	-0.032826	-0.0013072	0.30545	0.13873	0.21406	0.30046	0.43057	0.33323	0.39312	-0.085099	0.4687	0.2373	0.19995	-0.0070209	0.38126	0.54148	0.15841	0.29299	-0.032808	-0.032565	0.044228	0.011759	-0.070469	0.042226	0.57067	-0.085005	0.38639	0.24787	0.14829	0.11507
5.266955267	0.24988	0.0095587	0.12823	0.046932	0.91271	0.41174	0.27514	0.067091	0.15452	0.096242	0.071543	0.057181	0.042509	-0.041054	-0.027032	0.63953	0.20613	0.054215	0.076083	0.012425	-0.016282	0.35031	0.14012	0.22912	0.3483	0.38979	0.27727	0.37013	-0.087011	0.44576	0.24101	0.20086	0.0070361	0.35958	0.52827	0.13716	0.25746	-0.010947	-0.05538	0.034922	0.023146	-0.048542	-0.0050225	0.54463	-0.098131	0.28865	0.25498	0.11689	0.11833
5.339105339	0.21613	-0.0070647	0.13431	0.023912	0.87678	0.41692	0.25859	0.071726	0.2005	0.095745	0.063416	0.088725	0.070455	-0.04617	0.0033864	0.63176	0.21844	0.076805	0.060803	0.051817	-0.0043347	0.43095	0.13065	0.24971	0.38029	0.33515	0.23486	0.36112	-0.081207	0.45868	0.21155	0.2048	0.012496	0.3462	0.52007	0.14092	0.23834	0.00091728	-0.063626	0.0038792	0.03712	-0.036249	-0.046923	0.53801	-0.12233	0.26154	0.2828	0.09219	0.13698
5.411255411	0.24089	-0.04281	0.15311	-0.008056	0.85104	0.35872	0.24924	0.055609	0.17822	0.10144	0.06119	0.11796	0.095742	-0.055543	0.02509	0.63535	0.1987	0.080107	0.056386	0.063295	0.00836	0.55946	0.13944	0.26565	0.39666	0.29573	0.21823	0.36631	-0.096597	0.4663	0.17477	0.2047	0.013353	0.30594	0.52714	0.14715	0.23631	0.0074569	-0.063473	-0.01797	0.011655	-0.072659	-0.077055	0.53214	-0.10366	0.2961	0.32936	0.12536	0.12538
5.483405483	0.24645	-0.0453	0.16231	-0.021763	0.80557	0.30671	0.22329	0.037205	0.14202	0.084692	0.09727	0.14299	0.099693	-0.071365	0.022713	0.60756	0.18268	0.051231	0.052498	0.04197	0.015831	0.65554	0.14376	0.25974	0.40953	0.2578	0.21348	0.35903	-0.099324	0.45237	0.17163	0.19109	0.010016	0.25404	0.50292	0.14052	0.20958	0.056811	-0.079592	-0.026483	-0.027183	-0.10517	-0.069591	0.49596	-0.027515	0.30597	0.31209	0.17531	0.13946
5.555555556	0.19005	-0.031672	0.13517	-0.028623	0.76082	0.30002	0.19938	0.040477	0.12431	0.073843	0.10528	0.1559	0.069242	-0.080025	0.0068429	0.55993	0.22836	0.055034	0.064082	0.016306	0.0088296	0.69913	0.13552	0.23325	0.40489	0.20493	0.17309	0.33302	-0.072584	0.41992	0.18855	0.1836	0.0057369	0.22997	0.44418	0.12845	0.17093	0.11607	-0.097973	-0.052043	-0.037271	-0.053677	-0.019062	0.49539	0.044341	0.22496	0.24781	0.16817	0.21612
5.627705628	0.16521	-0.0087522	0.099166	-0.043918	0.80086	0.34398	0.20024	0.04954	0.12517	0.068409	0.089648	0.1348	0.058638	-0.066	-0.0016133	0.50918	0.25925	0.058429	0.093515	0.010143	0.0041155	0.70512	0.10492	0.20305	0.36281	0.14963	0.1008	0.3148	-0.015469	0.41466	0.201	0.18566	0.037019	0.23777	0.41937	0.15915	0.1541	0.1335	-0.08322	-0.063982	-0.009815	0.022859	-0.018665	0.50892	0.058932	0.17861	0.26434	0.16246	0.19379
5.6998557	0.22262	0.024519	0.12631	-0.025748	0.83252	0.36985	0.17949	0.03246	0.11979	0.048408	0.10547	0.10731	0.07166	-0.041915	0.0096657	0.49147	0.254	0.056122	0.15967	0.029955	-0.0010525	0.64825	0.05826	0.1778	0.31869	0.13017	0.059994	0.28166	0.053645	0.40053	0.20577	0.1628	0.14691	0.24663	0.41003	0.32152	0.18991	0.12823	-0.0617	-0.041386	0.014553	0.061425	-0.0081691	0.52533	0.08027	0.23568	0.3074	0.16756	0.087693
5.772005772	0.24662	0.0038804	0.14273	0.0054482	0.83261	0.37087	0.16926	0.0098673	0.11707	0.042817	0.13474	0.086178	0.073325	-0.036192	0.009001	0.4717	0.24078	0.045271	0.19668	0.057085	-0.00043652	0.57043	0.015421	0.15118	0.3149	0.14189	0.04283	0.23931	0.1769	0.36568	0.20914	0.13594	0.27426	0.24514	0.37161	0.57815	0.21281	0.12375	-0.058625	-0.019425	0.023877	0.098496	0.050503	0.51198	0.12125	0.28043	0.2829	0.16121	0.042456
5.844155844	0.20038	-0.038617	0.14461	0.010429	0.82766	0.37345	0.17263	0.013479	0.11873	0.041158	0.11965	0.089044	0.070286	-0.020552	0.0039471	0.42678	0.21146	0.022516	0.14048	0.063753	-0.0062238	0.52514	-0.021904	0.12694	0.33237	0.14301	0.034931	0.20099	0.31723	0.36901	0.23786	0.12948	0.3743	0.24124	0.32056	0.75078	0.19443	0.14246	-0.059673	-0.00017954	0.022991	0.1681	0.061893	0.47497	0.15461	0.26144	0.25052	0.18074	0.067972
5.916305916	0.14971	-0.029122	0.13721	0.016768	0.84576	0.35506	0.18325	0.049766	0.11447	0.041014	0.098813	0.1069	0.080016	0.0057019	-0.0014986	0.39903	0.15113	0.027915	0.087619	0.055257	0.0036848	0.49961	-0.047182	0.11268	0.33641	0.14058	0.041833	0.20602	0.38999	0.37785	0.26658	0.13755	0.4119	0.24806	0.28712	0.79828	0.17668	0.14466	-0.075155	0.0045731	0.034709	0.19921	0.030473	0.43389	0.20166	0.25805	0.26187	0.23189	0.11148
5.988455988	0.14756	-0.02076	0.13629	0.014131	0.89388	0.31397	0.19026	0.071805	0.11762	0.05323	0.081706	0.099246	0.10869	0.02233	-0.0056884	0.366	0.13934	0.025522	0.07537	0.046091	0.033688	0.49474	-0.069043	0.098299	0.32626	0.14627	0.042587	0.2432	0.38162	0.38362	0.27988	0.15297	0.39249	0.23526	0.24291	0.78823	0.17819	0.12684	-0.096966	0.026007	0.024415	0.18543	0.036481	0.43061	0.217	0.27466	0.28936	0.27243	0.14053
6.060606061	0.17394	-0.012507	0.15899	-0.016654	0.92209	0.2999	0.19005	0.043055	0.13729	0.060229	0.062875	0.064013	0.13091	0.031855	0.0039163	0.35976	0.18132	-0.010152	0.07875	0.052116	0.043665	0.47094	-0.06359	0.080667	0.30288	0.12465	0.027216	0.23737	0.36346	0.37861	0.26931	0.14575	0.4026	0.19201	0.20822	0.78557	0.19217	0.12428	-0.11715	0.059822	0.0041222	0.18836	0.047584	0.42494	0.19712	0.32397	0.26018	0.31778	0.11019
6.132756133	0.18081	0.017194	0.19192	-0.028	0.91019	0.31099	0.17593	0.020926	0.13076	0.057772	0.042319	0.057033	0.14927	0.048857	0.033857	0.36888	0.2027	-0.036293	0.1022	0.063139	0.042623	0.43067	-0.00646	0.062522	0.29389	0.077861	0.011534	0.2062	0.37212	0.36241	0.294	0.15414	0.39499	0.16969	0.2024	0.85653	0.17523	0.11899	-0.11031	0.098943	-0.0047248	0.19089	0.038876	0.37027	0.18629	0.36176	0.23345	0.36714	0.039569
6.204906205	0.17482	0.02422	0.19033	-0.040496	0.85768	0.28235	0.15326	0.023647	0.1059	0.07474	0.036486	0.051002	0.13711	0.061924	0.061531	0.36137	0.19538	-0.022052	0.096436	0.060839	0.047828	0.43234	0.070437	0.055934	0.31035	0.034517	-0.019722	0.19617	0.36479	0.329	0.32756	0.15043	0.36668	0.16621	0.22541	1.0949	0.13478	0.11669	-0.072598	0.16458	-0.001327	0.16636	0.07272	0.31499	0.23677	0.33629	0.24244	0.39828	0.012833
6.277056277	0.18062	0.030799	0.21127	-0.075916	0.81825	0.22762	0.13788	0.023196	0.10298	0.09501	0.028439	0.021606	0.10749	0.074026	0.058132	0.36758	0.1873	-0.0010703	0.059125	0.054539	0.033908	0.46102	0.1359	0.051056	0.32869	0.0075521	-0.04797	0.20988	0.34772	0.30922	0.33209	0.11639	0.3705	0.16517	0.30835	1.4158	0.13628	0.15336	-0.048356	0.23716	0.0049774	0.1348	0.084932	0.30865	0.28639	0.30883	0.24961	0.40849	0.071922
6.349206349	0.19743	0.03729	0.21919	-0.11	0.79564	0.21862	0.12778	0.014034	0.10809	0.093418	0.014516	0.040299	0.099806	0.075518	0.038357	0.34787	0.16079	0.0073832	0.032488	0.055438	0.0018694	0.48831	0.17425	0.057196	0.32344	-0.0051554	-0.06163	0.21489	0.32896	0.31318	0.32137	0.092245	0.39064	0.14637	0.45333	1.6568	0.15285	0.21196	-0.055933	0.28522	-0.0053602	0.13542	0.10405	0.33997	0.32971	0.30162	0.23773	0.3693	0.13943
6.421356421	0.1648	0.036346	0.18261	-0.095193	0.75608	0.19057	0.11783	0.021582	0.11084	0.095229	0.037553	0.069017	0.10078	0.073545	0.02106	0.30593	0.1009	0.0074919	0.02348	0.069079	-0.010894	0.52007	0.19049	0.10743	0.30584	-0.0019438	-0.064014	0.19267	0.30834	0.33614	0.30562	0.069378	0.41507	0.13881	0.55192	1.7798	0.14641	0.21648	-0.061013	0.29512	-0.014867	0.19072	0.18368	0.37655	0.36385	0.28901	0.24111	0.32501	0.092636
6.493506494	0.1318	0.031604	0.1449	-0.063239	0.73284	0.14338	0.10189	0.035678	0.11415	0.10165	0.054646	0.054546	0.099666	0.076562	0.023637	0.27497	0.064092	0.0057522	0.008401	0.054845	-0.013929	0.54743	0.25124	0.18104	0.28034	0.017959	-0.047085	0.16148	0.2872	0.36069	0.28741	0.058239	0.46659	0.1388	0.58852	1.892	0.13168	0.19566	-0.031285	0.29559	-0.0062031	0.20809	0.26237	0.39025	0.36312	0.25344	0.23709	0.30535	0.011317
6.565656566	0.11872	0.021972	0.15557	-0.043206	0.70287	0.11988	0.10103	0.035898	0.12619	0.092401	0.046796	0.012011	0.09443	0.066709	0.034178	0.25182	0.07973	-0.020068	0.012095	0.028577	-0.0052985	0.53632	0.34017	0.19775	0.25955	0.022092	-0.029147	0.14353	0.23906	0.35172	0.25877	0.06401	0.52773	0.11129	0.59602	1.9489	0.12605	0.19801	-0.004832	0.30642	-0.039102	0.1696	0.25356	0.39494	0.36424	0.2053	0.20103	0.2895	0.0015759
6.637806638	0.097917	-0.007905	0.17523	-0.035587	0.64672	0.092397	0.099183	0.05068	0.13401	0.097731	0.038362	0.010125	0.10596	0.054238	0.018875	0.23963	0.10669	-0.037837	0.025508	0.019371	0.018776	0.48428	0.37356	0.16164	0.23489	0.014842	-0.012781	0.15448	0.19533	0.35953	0.2415	0.080849	0.52535	0.083113	0.59066	1.8584	0.12258	0.2059	-0.0028485	0.31031	-0.067352	0.15104	0.22989	0.3646	0.37782	0.18983	0.17105	0.26077	0.037622
6.70995671	0.095827	-0.0053928	0.15369	-0.013382	0.62517	0.058573	0.11632	0.06228	0.11126	0.10475	0.039498	0.026772	0.12407	0.044274	0.0080395	0.23273	0.10179	0.0046769	0.036075	-0.01078	0.027762	0.44356	0.3528	0.13448	0.21652	0.019201	0.00088243	0.17414	0.16463	0.36973	0.24208	0.088294	0.44397	0.075432	0.56697	1.7208	0.10373	0.20803	-0.023199	0.33481	-0.068888	0.1449	0.24473	0.32732	0.37994	0.22332	0.15526	0.24805	0.081493
6.782106782	0.10474	0.021859	0.10847	0.015545	0.615	0.040709	0.14625	0.055979	0.085364	0.096159	0.017941	0.0070059	0.13742	0.037906	0.0033532	0.24514	0.10357	0.049341	0.024758	-0.03479	0.024894	0.41204	0.3071	0.1332	0.22173	0.029652	0.0050994	0.19336	0.1455	0.35323	0.24075	0.075846	0.39551	0.092543	0.5529	1.6361	0.075967	0.21309	-0.045954	0.38134	-0.0062333	0.16162	0.23499	0.32724	0.37021	0.25957	0.12691	0.22333	0.10991
6.854256854	0.14305	0.044088	0.073412	-0.00065647	0.58504	0.053544	0.15042	0.035079	0.087567	0.084056	-0.017698	-0.0045429	0.13314	0.048028	0.0027242	0.27041	0.14697	0.039415	0.016813	-0.034761	0.01736	0.34632	0.2509	0.15311	0.24785	0.029001	-0.00051429	0.19369	0.13395	0.30124	0.22739	0.072903	0.41286	0.096645	0.55293	1.6013	0.073952	0.23981	-0.056255	0.40877	0.06321	0.15531	0.20936	0.30698	0.38466	0.24811	0.098505	0.15468	0.11408
6.926406926	0.17365	0.10492	0.040791	-0.051486	0.54708	0.080069	0.18271	0.026365	0.099544	0.052366	-0.022374	-0.0076025	0.11391	0.059091	-0.012995	0.29431	0.20138	0.026563	0.040281	-0.042172	0.01872	0.27067	0.1814	0.16158	0.24736	0.032696	0.0056023	0.17934	0.1424	0.25134	0.23878	0.059265	0.41343	0.062065	0.51888	1.5101	0.084367	0.26958	-0.05308	0.38358	0.025409	0.10925	0.20934	0.29742	0.43502	0.17458	0.091908	0.073437	0.1211
6.998556999	0.18024	0.1647	0.00073039	-0.069887	0.52599	0.08047	0.26747	0.026372	0.10023	0.044944	-0.0020073	-0.019961	0.10582	0.050581	-0.047636	0.31887	0.23784	0.033861	0.057193	-0.034111	0.034495	0.23861	0.14119	0.16093	0.21484	0.038667	0.014269	0.18429	0.22934	0.22683	0.25419	0.035701	0.36404	0.041472	0.48142	1.4007	0.070239	0.27384	-0.034696	0.31414	-0.045536	0.084564	0.24389	0.30354	0.45105	0.1246	0.11584	0.022899	0.11755
7.070707071	0.17182	0.17139	-0.0059455	-0.054802	0.50268	0.092833	0.31285	0.011153	0.096375	0.064771	-0.0010083	-0.011108	0.10328	0.040014	-0.042075	0.34001	0.32827	0.035614	0.048084	-0.022178	0.051798	0.25692	0.16457	0.19338	0.20952	0.030776	0.011398	0.21661	0.51778	0.21661	0.22555	0.0089853	0.29027	0.034493	0.47834	1.3712	0.058875	0.24201	-0.011664	0.24823	-0.049125	0.091358	0.28376	0.27073	0.42159	0.11896	0.14798	0.054385	0.10949
7.142857143	0.16458	0.16492	0.0058342	-0.035485	0.48845	0.14586	0.28872	0.0066493	0.098505	0.094694	-0.016641	-0.013244	0.1161	0.047144	-0.024534	0.36249	0.52802	0.0425	0.02788	-0.042399	0.057541	0.28839	0.21432	0.22805	0.2242	0.028571	0.006073	0.23945	0.98436	0.20103	0.20469	0.0062172	0.23005	0.034487	0.47484	1.3442	0.059466	0.20247	-0.0036207	0.21915	-0.01726	0.09489	0.27398	0.26492	0.40274	0.16125	0.1135	0.13495	0.1294
7.215007215	0.15575	0.17726	0.0042554	-0.042088	0.43282	0.17688	0.29375	0.02924	0.095548	0.10001	-0.02698	-0.025882	0.1259	0.052427	-0.032018	0.38783	0.68151	0.032271	0.0098866	-0.052359	0.049648	0.29717	0.23849	0.27021	0.24347	0.038222	0.018866	0.26083	1.2887	0.22365	0.21143	0.015983	0.18794	0.035716	0.45901	1.2313	0.062562	0.19631	0.010897	0.24333	0.00197	0.075277	0.2659	0.27396	0.41409	0.23052	0.068334	0.17541	0.13439
7.287157287	0.13369	0.16502	0.011181	-0.045188	0.34503	0.14826	0.38496	0.063498	0.086371	0.09768	-0.023538	-0.029798	0.11987	0.043828	-0.027389	0.4112	0.69203	0.030504	0.0168	-0.012867	0.03402	0.30941	0.27316	0.27619	0.28299	0.060073	0.024582	0.27279	1.3839	0.23881	0.23529	0.020049	0.21373	0.021205	0.4174	1.1262	0.075358	0.22963	0.021793	0.27682	-0.028045	0.060796	0.28056	0.24103	0.42712	0.25794	0.086039	0.15917	0.085571
7.359307359	0.11923	0.15025	0.026402	-0.047751	0.29534	0.095982	0.47284	0.11023	0.084888	0.099645	-0.024972	-0.023148	0.12291	0.055715	-0.007598	0.41433	0.65649	0.039445	0.013246	0.030148	0.014763	0.32886	0.30952	0.22592	0.29937	0.075374	0.02841	0.24222	1.4064	0.19097	0.27334	0.019643	0.32109	0.013412	0.36525	1.0736	0.15352	0.29688	0.025143	0.2909	-0.037625	0.049395	0.28125	0.23947	0.41326	0.24263	0.10843	0.17756	0.041657
7.431457431	0.10956	0.15129	0.027332	-0.056565	0.28856	0.08757	0.49845	0.19086	0.087517	0.090093	-0.028886	0.0076758	0.13363	0.078555	0.0048539	0.3765	0.63342	0.0063662	-0.0098801	0.028821	-0.025441	0.32369	0.31444	0.21531	0.26709	0.0772	0.041842	0.21379	1.4308	0.14558	0.31188	0.010571	0.38877	0.023277	0.34206	1.013	0.30332	0.40327	0.011617	0.32456	-0.02964	0.037339	0.26268	0.28963	0.40623	0.26933	0.12767	0.2061	0.061056
7.503607504	0.1061	0.17553	0.020423	-0.065422	0.27759	0.10366	0.54541	0.23474	0.086312	0.076449	-0.022925	0.027044	0.14283	0.073578	-0.0011669	0.31709	0.58933	-0.025517	0.012556	-0.00416	-0.033777	0.29326	0.2965	0.22865	0.227	0.073651	0.054834	0.20722	1.4365	0.14709	0.38197	0.013529	0.39509	0.022163	0.31909	0.93661	0.40726	0.49751	-0.0016308	0.38334	-0.045996	0.03266	0.23407	0.35184	0.43449	0.28134	0.11695	0.17765	0.11861
7.575757576	0.12059	0.20982	-0.0018563	-0.051256	0.23701	0.097296	0.71535	0.25894	0.10672	0.057338	-0.02567	0.026732	0.14349	0.060422	0.0085073	0.2794	0.54057	-0.018088	0.034194	-0.032687	0.0070063	0.23826	0.25611	0.23353	0.18903	0.072885	0.062482	0.22475	1.4131	0.16337	0.4624	0.030566	0.41544	0.012444	0.28001	0.87318	0.44594	0.4961	-0.0056064	0.42394	-0.02821	0.006363	0.21745	0.36238	0.45158	0.26646	0.091293	0.17203	0.13312
7.647907648	0.1168	0.20794	-0.020889	-0.039671	0.24542	0.08673	0.91996	0.26813	0.1325	0.046083	-0.022125	0.028358	0.13639	0.05452	0.0072972	0.28805	0.50117	0.001519	0.050308	-0.019647	0.068384	0.19179	0.20708	0.26938	0.18217	0.068252	0.044373	0.25535	1.3332	0.18817	0.50905	0.046121	0.47517	0.0069569	0.2529	0.85001	0.4459	0.44114	0.0095326	0.42617	0.032096	0.00030755	0.25735	0.3398	0.45273	0.27332	0.081011	0.15538	0.12855
7.72005772	0.087859	0.16384	-0.019762	-0.053185	0.25609	0.074596	1.0703	0.26342	0.17421	0.096237	-0.010551	0.025802	0.13083	0.055028	-0.01534	0.2712	0.49103	0.026552	0.083686	-0.0054635	0.091476	0.18885	0.18245	0.28732	0.17871	0.071492	0.023504	0.22631	1.2238	0.22506	0.50832	0.051441	0.55166	0.0061756	0.24681	0.85183	0.41351	0.41637	0.031059	0.41998	0.080873	0.020614	0.23683	0.30357	0.44397	0.31875	0.087308	0.11448	0.11226
7.792207792	0.075162	0.13328	-0.01413	-0.058003	0.24583	0.054538	1.1363	0.24978	0.2322	0.2351	-0.020086	0.026813	0.13346	0.071049	-0.0088008	0.23488	0.44718	0.038746	0.10681	-0.0049359	0.063664	0.18667	0.16181	0.28633	0.14289	0.074335	0.027644	0.19244	1.1728	0.25054	0.48647	0.051869	0.64456	0.0029205	0.2279	0.83174	0.38591	0.39827	0.031963	0.38659	0.10808	0.03837	0.17103	0.26886	0.43125	0.31811	0.070893	0.10052	0.04064
7.864357864	0.083217	0.14069	-0.032041	-0.058788	0.22705	0.029602	1.1639	0.25535	0.30706	0.43119	-0.016751	0.041729	0.14307	0.10195	0.0014335	0.22347	0.40544	0.043314	0.09225	0.00067808	0.032073	0.17977	0.11689	0.29318	0.09849	0.079772	0.04063	0.19727	1.126	0.24885	0.4694	0.058902	0.65628	-0.00054078	0.20838	0.75926	0.34475	0.36629	0.0074893	0.30883	0.13543	0.054999	0.17414	0.24823	0.43137	0.30644	0.030109	0.13734	0.006315
7.936507937	0.094885	0.12158	-0.043343	-0.049062	0.19059	0.037457	1.1217	0.2583	0.34587	0.61359	0.0023887	0.042748	0.15897	0.1179	0.015984	0.21174	0.39017	0.057322	0.048699	-0.001623	0.026595	0.20892	0.078632	0.32275	0.078557	0.074546	0.042342	0.18906	1.0604	0.22068	0.44587	0.068947	0.58896	-0.0069854	0.20816	0.67239	0.33238	0.37572	-0.015441	0.26858	0.18761	0.082369	0.2305	0.21904	0.44143	0.33122	0.056862	0.20005	0.039949
8.008658009	0.11303	0.099533	-0.0062294	-0.048471	0.18704	0.064295	1.023	0.23129	0.31572	0.74731	0.0042862	0.022499	0.16288	0.11087	0.032554	0.17826	0.34333	0.083088	0.03619	0.0066438	0.019448	0.27002	0.066628	0.34489	0.083607	0.07773	0.030446	0.17042	1.0262	0.20663	0.42512	0.047948	0.51783	-0.018474	0.18835	0.64607	0.33118	0.44949	-0.020389	0.26677	0.25346	0.12793	0.19671	0.17812	0.42824	0.3299	0.10274	0.20631	0.063582
8.080808081	0.12917	0.10727	0.0051373	-0.066312	0.21042	0.05425	0.97589	0.1896	0.31085	0.8578	-0.0099179	0.0069309	0.16876	0.11073	0.028663	0.14187	0.2751	0.096843	0.047739	-0.0031368	-0.011185	0.30836	0.066011	0.36755	0.097958	0.089813	0.014423	0.17806	1.1075	0.23313	0.41552	0.01242	0.45356	-0.0091994	0.15306	0.6071	0.31497	0.52744	-0.012587	0.2535	0.27131	0.13262	0.13422	0.18285	0.41153	0.31252	0.085437	0.15778	0.092145
8.152958153	0.12784	0.11756	-0.012268	-0.054845	0.22798	0.052375	1.002	0.15285	0.34225	0.92418	-0.026831	0.023452	0.18259	0.12275	0.011048	0.13312	0.23075	0.064137	0.0359	-0.012091	-0.041383	0.30757	0.056708	0.4127	0.096784	0.090134	-0.0022074	0.18098	1.1941	0.27257	0.41535	-0.013325	0.42618	0.042831	0.1457	0.54681	0.30793	0.58923	0.00078848	0.2379	0.22365	0.10589	0.15614	0.22519	0.3793	0.3401	0.036074	0.15485	0.09634
8.225108225	0.1026	0.11377	-0.023406	-0.046085	0.21718	0.062173	0.9779	0.14421	0.34537	0.93672	-0.025578	0.03964	0.21432	0.14083	0.00056578	0.13186	0.22096	0.045348	0.03446	-0.013573	-0.027766	0.30627	0.055952	0.46482	0.091574	0.058852	-0.011123	0.1864	1.2148	0.32715	0.42712	-0.014006	0.37873	0.080116	0.186	0.50956	0.32919	0.59295	-0.0066162	0.24558	0.16374	0.056661	0.21254	0.25354	0.32682	0.36442	0.049157	0.15542	0.070037
8.297258297	0.098713	0.11375	-0.020328	-0.054109	0.21307	0.085448	0.87658	0.13973	0.33385	0.93609	-0.028287	0.02288	0.32306	0.14806	-0.014353	0.12438	0.21419	0.066004	0.056923	-0.00028088	-0.0056049	0.35116	0.071638	0.54336	0.11424	0.018256	-0.011286	0.14608	1.237	0.35336	0.42317	0.0073721	0.3419	0.094411	0.27438	0.49116	0.34882	0.57665	-0.013551	0.24442	0.14225	-0.0010361	0.21332	0.27096	0.28211	0.30457	0.080767	0.10648	0.025343
8.369408369	0.10567	0.1118	-0.020698	-0.052458	0.24377	0.11112	0.77742	0.10624	0.30074	0.86814	-0.037922	0.0021621	0.44338	0.13292	-0.017968	0.10973	0.29034	0.060612	0.058031	0.022594	0.014842	0.40697	0.094482	0.62053	0.14393	0.0053391	-0.026201	0.11141	1.2722	0.3252	0.4119	0.018436	0.34103	0.099312	0.38268	0.54053	0.34329	0.5326	-0.024503	0.23023	0.16648	-0.020606	0.21194	0.27378	0.24077	0.2202	0.056679	0.10214	-0.0055584
8.441558442	0.092061	0.11485	-0.020558	-0.050994	0.24193	0.092493	0.7639	0.10185	0.28882	0.81225	-0.029925	0.010266	0.51788	0.11112	-0.011945	0.092034	0.49868	0.03375	0.035322	0.035768	0.012696	0.38686	0.10144	0.67157	0.14349	-0.020288	-0.064207	0.13772	1.2547	0.27758	0.39251	0.015593	0.35001	0.085483	0.52303	0.67648	0.30496	0.49409	-0.016633	0.21534	0.17887	-0.010986	0.26981	0.2778	0.19879	0.19489	0.031201	0.099467	-0.010462
8.513708514	0.079832	0.12009	-0.0045406	-0.062785	0.2342	0.037215	0.8049	0.12348	0.29741	0.76398	-0.01052	0.030728	0.53931	0.092154	-0.0083004	0.069632	0.65113	0.0078677	0.03003	0.03862	0.0035366	0.33444	0.093373	0.69971	0.12399	-0.04232	-0.087118	0.18671	1.0937	0.25719	0.33299	0.012687	0.33209	0.05657	0.69844	0.82994	0.25961	0.48057	-0.0057704	0.19175	0.14	-0.021916	0.36007	0.27988	0.20394	0.1968	0.04759	0.081576	0.019538
8.585858586	0.07772	0.12361	0.019615	-0.058696	0.26508	0.0072437	0.78614	0.12397	0.29825	0.74278	-0.0044097	0.028398	0.54819	0.088154	-8.52E-05	0.057512	0.70021	0.045505	0.037744	0.034377	0.016148	0.31344	0.072871	0.70892	0.10821	-0.035267	-0.086898	0.23174	0.97683	0.28655	0.30936	0.0088452	0.27975	0.045665	0.82485	0.91917	0.23025	0.46139	-0.0089005	0.17201	0.16388	-0.045436	0.36243	0.28705	0.21657	0.13999	0.057759	0.077522	0.053812
8.658008658	0.081104	0.10922	0.048228	-0.024425	0.27654	0.013751	0.71087	0.091065	0.30383	0.74142	-0.013961	0.02784	0.5951	0.097787	-0.0032826	0.064092	0.70781	0.082521	0.019837	0.010158	0.020747	0.32831	0.063032	0.66983	0.1006	-0.045784	-0.081265	0.252	1.0059	0.32376	0.32487	0.014234	0.2689	0.051893	0.86808	0.92407	0.21636	0.43621	-0.01243	0.15356	0.20122	-0.037354	0.33775	0.29533	0.17895	0.082638	0.065183	0.08172	0.043693
8.73015873	0.072786	0.077017	0.067312	0.016072	0.28255	0.0081815	0.64225	0.06182	0.30116	0.75694	-0.014301	0.024383	0.64543	0.10469	-0.0092922	0.079193	0.72116	0.061903	0.038321	-0.00067729	0.0035612	0.36191	0.093156	0.57803	0.10104	-0.064325	-0.087591	0.26224	1.0418	0.31525	0.32573	0.014116	0.29417	0.048692	0.87076	0.89651	0.21934	0.38636	-0.014477	0.15521	0.16546	-0.015312	0.38221	0.27668	0.14692	0.021374	0.033082	0.071425	-0.017791
8.802308802	0.050746	0.032152	0.063659	0.037804	0.2925	-0.0047707	0.63296	0.072052	0.29698	0.75238	-0.028548	0.018096	0.68053	0.099204	-0.0043271	0.081709	0.68895	0.043338	0.096562	-0.007	-0.012489	0.35646	0.13834	0.49191	0.12059	-0.046302	-0.083942	0.24243	0.92854	0.32289	0.30848	0.0037767	0.3245	0.027436	0.85966	0.86771	0.21029	0.34131	-0.013504	0.15456	0.11623	-0.012762	0.44016	0.2312	0.097829	-0.038195	0.019482	0.056321	-0.04616
8.874458874	0.04649	0.0089511	0.046854	0.029406	0.26806	-0.02576	0.67435	0.097062	0.29534	0.72465	-0.035232	0.037926	0.70599	0.07571	0.016545	0.084149	0.59543	0.060513	0.13321	-0.011111	0.017076	0.30207	0.1549	0.4598	0.1568	-0.030462	-0.070939	0.24452	0.83985	0.36027	0.28871	-0.011823	0.32934	0.023109	0.83801	0.83038	0.17407	0.30863	-0.029804	0.12349	0.1017	-0.037072	0.42549	0.20992	0.05619	-0.06525	0.04941	0.06496	0.013862
8.946608947	0.067707	0.012275	0.042142	0.037058	0.26069	-0.029617	0.72069	0.095005	0.29313	0.69485	-0.028433	0.096214	0.75023	0.074171	0.034136	0.074941	0.54527	0.097386	0.14296	0.023012	0.050479	0.24073	0.15314	0.47234	0.18176	-0.026009	-0.058348	0.28769	0.92286	0.36139	0.24352	-0.0023373	0.30648	0.019723	0.77341	0.79853	0.13219	0.27743	-0.064637	0.089272	0.081028	-0.064589	0.36541	0.18969	0.066506	-0.058269	0.072756	0.057566	0.028377
9.018759019	0.083767	0.042101	0.048009	0.078331	0.28377	-0.013353	0.70786	0.06501	0.28603	0.67243	-0.020752	0.19065	0.75009	0.066925	0.033836	0.061935	0.56695	0.12602	0.13289	0.043174	0.062595	0.21941	0.16184	0.48511	0.18312	-0.024043	-0.055906	0.33282	0.94489	0.34152	0.22335	0.011946	0.25944	0.0064083	0.69242	0.76667	0.10848	0.24558	-0.079914	0.075395	0.062401	-0.091498	0.37973	0.14098	0.09467	-0.029385	0.057678	0.022981	-0.019764
9.090909091	0.0923	0.092777	0.059403	0.10507	0.29339	-0.0042467	0.64213	0.049	0.27894	0.64738	-0.011362	0.30161	0.68532	0.039252	0.031246	0.04201	0.56001	0.11937	0.10649	0.039469	0.085919	0.21811	0.17725	0.47229	0.16079	-0.016387	-0.055471	0.39294	0.87976	0.35383	0.21728	0.010939	0.21591	0.0050415	0.64243	0.71026	0.10381	0.24627	-0.09064	0.052835	0.071417	-0.098358	0.41393	0.12794	0.048728	-0.022824	0.041207	-0.0030766	0.00024306
9.163059163	0.13196	0.1116	0.056258	0.057024	0.27984	-0.0017803	0.5815	0.058021	0.26363	0.6086	-0.01281	0.38734	0.62702	0.017454	0.029929	0.028943	0.51498	0.10626	0.091851	0.03134	0.09175	0.2113	0.18885	0.47364	0.12899	-0.0046885	-0.03978	0.41679	0.7983	0.43463	0.20578	-0.0063181	0.24313	0.035178	0.60599	0.63913	0.10336	0.2387	-0.10571	0.020462	0.10573	-0.075451	0.35797	0.13984	-0.016319	-0.040365	0.029652	-0.0037757	0.030523
9.235209235	0.15319	0.096122	0.041527	-0.0042388	0.27633	-0.0047302	0.56416	0.077073	0.23723	0.57198	-0.025704	0.45436	0.62278	0.014136	0.014078	0.030658	0.44946	0.098413	0.094603	0.033912	0.0716	0.16854	0.17543	0.50373	0.096598	-0.0014819	-0.023965	0.45952	0.77554	0.50709	0.17225	-0.019135	0.30671	0.10095	0.57914	0.57464	0.10115	0.19931	-0.12536	0.0093642	0.10455	-0.061643	0.2707	0.16288	-0.040948	-0.042084	0.010627	-0.0069771	0.034749
9.307359307	0.13989	0.070455	0.026416	-0.029504	0.27476	-0.017303	0.53364	0.099647	0.20653	0.57182	-0.037216	0.52238	0.59872	0.026501	0.0019424	0.036587	0.39115	0.066145	0.078201	0.066136	0.041329	0.144	0.14209	0.52265	0.070563	0.013981	-0.016599	0.47018	0.80375	0.53721	0.16297	-0.016108	0.31724	0.15535	0.54394	0.52398	0.075201	0.16966	-0.12339	0.0087347	0.12356	-0.065717	0.23497	0.21216	-0.048987	-0.039135	0.02395	-0.047211	0.073393
9.37950938	0.10687	0.04081	0.0080531	-0.036686	0.2629	-0.012988	0.50031	0.11819	0.20559	0.57087	-0.049201	0.62198	0.53366	0.036375	-0.0035063	0.058761	0.40054	0.043998	0.073387	0.082907	0.024733	0.13438	0.097785	0.49743	0.063461	0.060616	-0.016902	0.41902	0.78358	0.56012	0.17249	-0.017885	0.30048	0.15851	0.49982	0.47801	0.047833	0.15089	-0.087274	-0.0029328	0.154	-0.02432	0.22037	0.26524	-0.061435	-0.064394	0.043298	-0.063999	0.067619
9.451659452	0.078487	0.0243	0.0021604	-0.036991	0.23395	-0.00055019	0.52673	0.12176	0.2086	0.54181	-0.052835	0.6163	0.52168	0.031486	0.0029593	0.10396	0.42156	0.035765	0.06962	0.07966	0.020694	0.10997	0.050073	0.46637	0.077796	0.059384	-0.018718	0.40116	0.7304	0.55355	0.14781	-0.033019	0.27537	0.13157	0.46478	0.44526	0.047964	0.13892	-0.059944	0.0071114	0.1428	-0.041037	0.19497	0.31152	-0.076826	-0.1026	0.075727	-0.065302	0.045238
9.523809524	0.071395	0.032791	0.012364	-0.016166	0.20601	-0.00053148	0.58191	0.12198	0.20346	0.52389	-0.032007	0.5807	0.52105	0.014576	0.010407	0.13742	0.41516	0.031935	0.045326	0.074685	0.011094	0.075754	0.019967	0.45567	0.092652	0.055115	0.018851	0.43987	0.6614	0.53293	0.10285	-0.018017	0.24537	0.09651	0.44113	0.42114	0.056554	0.10973	-0.073046	0.039647	0.1218	-0.10822	0.15236	0.34669	-0.089977	-0.11496	0.10173	-0.048146	0.032771
9.595959596	0.083214	0.038863	0.007039	0.016178	0.173	0.017059	0.59337	0.11747	0.19787	0.50499	-0.011019	0.53802	0.51169	0.00019819	0.011179	0.11789	0.39945	0.016804	0.014181	0.080343	0.013668	0.040511	0.018541	0.43412	0.11424	0.098324	0.072513	0.42977	0.65245	0.4929	0.081783	0.022443	0.22398	0.067108	0.38664	0.40367	0.041867	0.085278	-0.087186	0.059696	0.15036	-0.1118	0.15509	0.36441	-0.092455	-0.13128	0.097329	-0.010774	0.043352
9.668109668	0.07503	0.012691	-0.032616	0.033051	0.1426	0.037242	0.57233	0.10659	0.1708	0.46777	0.0034999	0.50637	0.50918	0.017214	0.0074385	0.12335	0.35939	0.011988	0.0081959	0.097173	-0.0099933	0.006598	0.0252	0.38072	0.12321	0.12885	0.11006	0.39628	0.59626	0.4771	0.10518	0.036512	0.22167	0.064977	0.32796	0.3799	0.0081212	0.12546	-0.10519	0.041917	0.185	-0.07682	0.23721	0.35804	-0.0767	-0.14061	0.10556	-0.012119	0.068074
9.74025974	0.06299	-0.024465	-0.068055	0.0030763	0.14187	0.038816	0.57358	0.10347	0.1597	0.45226	0.023345	0.47285	0.47598	0.02324	0.0051943	0.17072	0.2884	0.0099555	0.00708	0.10711	-0.048682	-0.019765	0.0030184	0.31641	0.11849	0.14912	0.13377	0.37072	0.5632	0.47288	0.12794	0.027554	0.19186	0.10193	0.3055	0.33846	-0.013285	0.15495	-0.13757	0.038269	0.17764	-0.048417	0.27495	0.33813	-0.091959	-0.16251	0.10229	-0.017257	0.078223
9.812409812	0.099986	-0.013774	-0.078548	-0.015242	0.14081	0.08211	0.59453	0.093749	0.16669	0.46489	0.057419	0.44104	0.41195	-0.0093778	0.015511	0.19257	0.22708	0.0047047	-0.0034392	0.10598	0.015148	-0.046806	-0.035227	0.27407	0.13568	0.16334	0.16123	0.35072	0.64921	0.47041	0.097025	0.01617	0.13902	0.13369	0.29821	0.31018	-0.01091	0.13653	-0.14	0.097582	0.14619	-0.043514	0.17557	0.33743	-0.11494	-0.14315	0.052458	0.002776	0.085804
9.884559885	0.13629	0.0097896	-0.088729	0.027541	0.12177	0.14295	0.61212	0.06794	0.17933	0.48533	0.097915	0.48903	0.3763	-0.025639	0.011018	0.18454	0.19971	-0.016569	-0.0074634	0.11457	0.20636	-0.064909	-0.053777	0.24427	0.15479	0.17269	0.16991	0.3509	0.80465	0.44644	0.057209	0.0079444	0.10937	0.13339	0.27586	0.28895	-0.0079394	0.098003	-0.12168	0.15721	0.11602	-0.068458	0.077521	0.3256	-0.10356	-0.10336	0.009151	0.021978	0.045993
9.956709957	0.14832	0.0012841	-0.094459	0.062765	0.1223	0.14504	0.60502	0.060311	0.16921	0.47619	0.082626	0.56349	0.392	-0.033267	-0.006165	0.16525	0.18112	-0.018388	0.022944	0.11435	0.35899	-0.068128	-0.055649	0.19968	0.13987	0.15446	0.1488	0.32936	0.93659	0.41833	0.059662	0.022011	0.10772	0.13947	0.25721	0.25453	-0.018447	0.070625	-0.11771	0.18985	0.12318	-0.088759	0.069962	0.30614	-0.09471	-0.093727	0.0060116	0.017955	0.01248
10.02886003	0.16125	-0.014911	-0.10847	0.040677	0.10987	0.10936	0.56152	0.045662	0.15746	0.45835	0.030105	0.61626	0.42366	-0.014501	0.0035796	0.1383	0.16059	0.0089094	0.065093	0.096686	0.42844	-0.067344	-0.049929	0.14935	0.13001	0.11579	0.11318	0.32265	0.98596	0.45025	0.076953	0.027487	0.090459	0.13514	0.24065	0.23237	-0.01863	0.067666	-0.10763	0.19815	0.16571	-0.055799	0.11292	0.32301	-0.11335	-0.12307	0.030744	-0.037096	0.012333
10.1010101	0.14413	-0.027351	-0.11316	-0.0057266	0.10163	0.077662	0.53579	0.036497	0.14664	0.45918	0.01129	0.62848	0.42293	0.020195	0.0097148	0.099395	0.13851	-0.0090078	0.067545	0.084415	0.5382	-0.056817	-0.029949	0.10056	0.16713	0.11959	0.10058	0.34316	1.0014	0.4709	0.074053	0.026698	0.052807	0.11728	0.20777	0.20202	-0.017555	0.055528	-0.099762	0.20307	0.18836	-0.06526	0.14728	0.33047	-0.11942	-0.11964	0.084494	-0.062206	0.024596
10.17316017	0.1054	-0.011288	-0.11419	-0.022164	0.11363	0.071054	0.53061	0.025149	0.13054	0.46268	0.027036	0.62019	0.39242	0.017743	0.010912	0.096244	0.16269	-0.014056	0.045294	0.085256	0.66361	-0.051609	-0.018908	0.039683	0.21504	0.14477	0.12269	0.36371	1.0676	0.44784	0.046745	0.025614	0.039993	0.10568	0.15676	0.17399	-0.022689	0.018571	-0.10147	0.22522	0.12114	-0.11987	0.11006	0.29206	-0.13562	-0.082871	0.13197	-0.059722	0.027851
10.24531025	0.10817	0.014232	-0.11222	0.016318	0.12157	0.092676	0.5184	0.026733	0.13726	0.43402	0.049523	0.58827	0.36274	0.01732	0.014688	0.12559	0.20948	0.013367	0.018509	0.061703	0.70457	-0.050611	-0.0068632	0.0041218	0.27175	0.12915	0.13643	0.3566	1.1268	0.43181	0.053313	0.02297	0.049449	0.096186	0.12839	0.18031	-0.019687	0.0046434	-0.08766	0.25131	0.06313	-0.10757	0.077481	0.22572	-0.16493	-0.079822	0.15311	-0.085489	0.043472
10.31746032	0.14615	0.036449	-0.095937	0.045824	0.11496	0.11945	0.48756	0.055824	0.14086	0.38658	0.067504	0.54067	0.32476	0.041506	0.024618	0.16058	0.19548	-0.0046874	-0.0067641	0.010378	0.7072	-0.02525	-0.0076193	-0.0135	0.33804	0.0994	0.114	0.34075	1.1652	0.41531	0.08533	0.015107	0.056798	0.085222	0.13234	0.21517	0.00092605	0.026334	-0.076302	0.26194	0.075464	-0.062029	0.059458	0.18509	-0.16201	-0.061025	0.14682	-0.12225	0.080198
10.38961039	0.19273	0.041118	-0.082243	0.039916	0.097183	0.14276	0.46128	0.065761	0.12907	0.34666	0.065688	0.49754	0.29058	0.058634	0.042351	0.22468	0.15636	-0.027987	-0.010899	-0.0046172	0.70742	0.019478	-0.014393	-0.027251	0.36959	0.085619	0.067398	0.32448	1.183	0.38865	0.1159	0.015806	0.087309	0.064105	0.1406	0.22461	0.04245	0.052212	-0.090811	0.23641	0.11378	-0.033798	0.076023	0.20037	-0.14719	-0.030224	0.13965	-0.12041	0.087332
10.46176046	0.28112	-0.007034	-0.057684	0.044599	0.086273	0.12878	0.46228	0.072284	0.11852	0.3582	0.067172	0.49608	0.27724	0.053345	0.045683	0.27529	0.15907	-0.022294	0.00727	0.012925	0.71296	0.036342	0.001552	-0.048894	0.36407	0.061402	0.032594	0.30675	1.1909	0.36364	0.12451	0.022351	0.15092	0.047673	0.11577	0.20361	0.064683	0.059163	-0.10756	0.19485	0.086375	-0.004731	0.063748	0.23367	-0.16971	-0.038842	0.12641	-0.12083	0.092351
10.53391053	0.3539	-0.051062	-0.04224	0.068142	0.073678	0.10425	0.44856	0.086202	0.11952	0.37468	0.06654	0.49695	0.29579	0.037945	0.030538	0.28403	0.18094	-0.0010045	0.016793	0.036154	0.69045	0.04198	0.02448	-0.053688	0.37633	0.041848	0.0039819	0.29412	1.2278	0.36727	0.13355	0.015974	0.22688	0.036051	0.09704	0.17527	0.071836	0.049321	-0.10348	0.15013	0.04589	0.0058986	0.032559	0.24551	-0.19912	-0.053637	0.11489	-0.14203	0.085034
10.60606061	0.37442	-0.058211	-0.034029	0.056699	0.064662	0.067464	0.39983	0.081235	0.14015	0.34104	0.064921	0.45553	0.30581	0.024584	0.033959	0.25354	0.18661	0.0026567	0.015812	0.070054	0.62425	0.043512	0.035172	-0.040152	0.39416	0.03004	-0.021039	0.29766	1.2614	0.35604	0.18711	0.01758	0.26731	0.023905	0.10115	0.16785	0.063841	0.016113	-0.093799	0.11533	0.094713	-0.056751	0.068116	0.24424	-0.18531	-0.030873	0.067379	-0.15474	0.066687
10.67821068	0.39634	-0.033144	-0.018848	0.018321	0.060116	0.035482	0.39033	0.097252	0.15037	0.29325	0.066945	0.42557	0.26463	0.022024	0.041637	0.26991	0.19101	-0.0070133	0.019018	0.087619	0.56989	0.047704	0.019208	-0.013819	0.38196	0.049002	-0.029249	0.29543	1.2337	0.30041	0.23298	0.024358	0.26266	0.01832	0.10471	0.18417	0.047142	-0.010595	-0.079376	0.11052	0.17795	-0.12139	0.1115	0.23165	-0.18079	0.022323	0.021488	-0.14648	0.059756
10.75036075	0.40459	0.0077717	0.0048006	0.010225	0.061947	0.033907	0.42552	0.15214	0.12329	0.25954	0.044752	0.39326	0.24281	0.034715	0.03552	0.37433	0.19741	-0.0028956	0.0078223	0.060843	0.55109	0.053603	0.012763	-0.00032346	0.35327	0.064102	-0.032581	0.28236	1.2436	0.24965	0.21548	0.020006	0.28281	0.016878	0.097216	0.23284	0.05249	-0.0047334	-0.072693	0.1189	0.21806	-0.13036	0.084786	0.22011	-0.18283	0.02685	-0.0021507	-0.15973	0.086604
10.82251082	0.37254	0.042905	0.019399	0.040395	0.082115	0.03617	0.43533	0.19717	0.074775	0.23581	0.043767	0.37012	0.26293	0.033403	0.0074467	0.4731	0.16621	-0.0056125	-0.014191	0.01025	0.54841	0.061958	0.018064	-0.023048	0.34278	0.053871	-0.034719	0.28767	1.2634	0.24831	0.19411	0.020451	0.37188	0.0056641	0.092981	0.28894	0.058575	0.023174	-0.05852	0.14238	0.21206	-0.10608	0.047333	0.19012	-0.18952	-0.017183	-0.0071387	-0.16735	0.1229
10.89466089	0.33617	0.07953	-0.0020608	0.076633	0.097197	0.047759	0.39219	0.18203	0.059158	0.20864	0.067359	0.36528	0.26853	0.015247	-0.0059207	0.50679	0.11348	-0.014009	-0.031302	-0.0093799	0.55091	0.06979	0.0094521	-0.05697	0.36241	0.050624	-0.031932	0.31808	1.2187	0.27402	0.19162	0.023131	0.49179	-0.0091906	0.082879	0.36109	0.050397	0.040995	-0.028164	0.17379	0.17942	-0.055225	0.042641	0.13383	-0.21086	-0.0083855	0.019397	-0.16237	0.12265
10.96681097	0.31819	0.15474	-0.038518	0.096681	0.094356	0.079095	0.34027	0.14169	0.086897	0.18548	0.079514	0.37613	0.25572	0.0013437	0.001031	0.52053	0.093612	-0.0054621	-0.032197	0.0075102	0.50719	0.076244	-0.0039034	-0.079066	0.37631	0.057148	-0.035701	0.35686	1.1551	0.31691	0.18027	0.0056785	0.55633	-0.013319	0.068975	0.44341	0.044971	0.088543	0.010866	0.18673	0.13285	-0.011229	0.045425	0.12446	-0.24189	0.018188	0.03696	-0.1503	0.12815
11.03896104	0.32154	0.25871	-0.036957	0.11076	0.093622	0.085189	0.30863	0.12112	0.091572	0.18548	0.091963	0.37097	0.23321	-0.0044449	-0.005625	0.51384	0.11093	0.0020372	-0.024402	0.04482	0.46637	0.065165	0.0017393	-0.083982	0.37287	0.066844	-0.023578	0.36613	1.0841	0.35517	0.18361	-0.020423	0.57281	-0.013029	0.075288	0.48024	0.023794	0.14063	0.045854	0.18033	0.075973	-0.020251	0.041349	0.14939	-0.2584	0.015718	0.061536	-0.12988	0.10897
11.11111111	0.32709	0.32371	-0.0093843	0.10036	0.066047	0.063577	0.31781	0.11117	0.075785	0.19259	0.10004	0.35709	0.21115	-0.0023676	-0.0066177	0.46175	0.11282	-0.0052548	-0.007509	0.082564	0.424	0.046909	0.0041251	-0.098762	0.37357	0.082888	0.0027978	0.3656	1.0411	0.36895	0.22695	-0.050238	0.57125	-0.020877	0.11886	0.48382	-0.005836	0.15685	0.044997	0.16518	0.090918	-0.092884	0.048216	0.13883	-0.24115	0.016438	0.073884	-0.11656	0.07839
11.18326118	0.3022	0.34573	0.020889	0.11029	0.041198	0.059628	0.36892	0.097054	0.084568	0.1936	0.10491	0.34234	0.19589	-0.001811	-0.013353	0.40071	0.08618	-0.010046	-0.0065781	0.074686	0.42544	0.059521	-0.0025282	-0.11576	0.37525	0.12448	0.024381	0.34459	1.0465	0.32806	0.25991	-0.070868	0.67615	-0.037327	0.16974	0.47144	-0.019973	0.14381	0.032189	0.16194	0.15285	-0.13693	0.05208	0.095712	-0.20895	0.051968	0.078245	-0.14521	0.056156
11.25541126	0.2699	0.36804	0.031452	0.24349	0.027873	0.047068	0.50239	0.1196	0.0794	0.19721	0.11182	0.33508	0.18935	-0.0054753	-0.016689	0.38416	0.074339	-0.0404	-0.032107	0.041225	0.45457	0.086684	0.027397	-0.13399	0.34425	0.17553	0.043316	0.31209	1.022	0.28918	0.24368	-0.087777	0.8215	-0.038941	0.19156	0.46899	-0.017061	0.11907	0.07846	0.18023	0.17563	-0.12659	0.020317	0.037389	-0.17611	0.1397	0.10381	-0.19262	0.053525
11.32756133	0.23354	0.37578	0.015388	0.45414	0.022747	0.045105	0.66807	0.15991	0.033918	0.17776	0.12589	0.30959	0.23383	0.0069966	0.001975	0.4	0.056882	-0.077131	-0.047459	0.022146	0.57135	0.11372	0.08223	-0.13542	0.32206	0.18839	0.058647	0.29311	0.96686	0.27164	0.2422	-0.10245	0.88113	-0.041818	0.19815	0.45011	-0.0019381	0.1005	0.24474	0.19781	0.17782	-0.10298	-0.044289	0.0072599	-0.18847	0.23545	0.098507	-0.1956	0.078216
11.3997114	0.22579	0.37934	-0.010271	0.62026	0.024829	0.033069	0.7452	0.15985	0.0051777	0.13427	0.11531	0.25395	0.31922	0.015638	0.021235	0.39355	0.05919	-0.063437	-0.061882	0.039838	0.87498	0.1343	0.13625	-0.10256	0.32379	0.18639	0.071781	0.28883	0.96028	0.24518	0.22863	-0.10021	0.95225	-0.05261	0.20261	0.40376	0.013438	0.083068	0.44229	0.18373	0.19246	-0.087946	-0.059832	0.026065	-0.20694	0.23784	0.067695	-0.17386	0.10728
11.47186147	0.2526	0.35482	-0.042795	0.75617	0.027823	0.030234	0.74679	0.12726	-0.0061117	0.14697	0.097796	0.24068	0.35016	0.0033224	0.016456	0.38293	0.060419	-0.047492	-0.061036	0.051003	1.1849	0.13204	0.1511	-0.053576	0.30121	0.19181	0.081631	0.27398	1.0658	0.15791	0.18113	-0.089994	1.0165	-0.055391	0.21	0.36695	0.01855	0.083869	0.5444	0.14936	0.19937	-0.046488	-0.013119	0.029289	-0.19799	0.20647	0.069996	-0.15811	0.11944
11.54401154	0.24797	0.34705	-0.076219	0.83991	0.015172	0.011339	0.69609	0.099763	-0.038087	0.23918	0.089589	0.25327	0.3344	0.0026453	0.0074181	0.39472	0.053089	-0.055464	-0.032736	0.050517	1.3368	0.12008	0.14187	-0.025246	0.26628	0.20028	0.074759	0.25779	1.1536	0.12977	0.16667	-0.095066	0.97807	-0.048223	0.23357	0.34527	0.0051145	0.093329	0.59871	0.11855	0.22927	0.022751	0.029578	0.042908	-0.1948	0.21765	0.065128	-0.16519	0.10595
11.61616162	0.19547	0.36603	-0.074068	0.8403	-0.033913	-0.031109	0.65565	0.076554	-0.047198	0.37309	0.081833	0.25015	0.32611	0.0095384	-0.0023391	0.40842	0.072359	-0.0572	-0.006853	0.025969	1.3712	0.1327	0.14781	-0.0029103	0.24815	0.21696	0.071074	0.24749	1.2549	0.15609	0.2027	-0.10692	0.91752	-0.047864	0.28718	0.30887	-0.012204	0.12959	0.64442	0.086218	0.25706	0.061125	0.040624	0.092269	-0.21062	0.24489	0.034885	-0.19561	0.098613
11.68831169	0.16748	0.35789	-0.072434	0.77932	-0.072242	-0.045876	0.64792	0.065953	-0.015016	0.48986	0.080902	0.21553	0.3374	-0.0077001	-0.024895	0.43046	0.079918	-0.061799	-0.010599	0.022879	1.3161	0.16191	0.1748	0.033118	0.22009	0.23736	0.099416	0.22857	1.3125	0.15995	0.24991	-0.10572	0.95601	-0.034266	0.34131	0.28212	-0.02192	0.17646	0.67143	0.075767	0.26973	0.051118	-0.012858	0.10414	-0.2018	0.23358	-0.02676	-0.18902	0.097621
11.76046176	0.20193	0.35776	-0.063447	0.74909	-0.065083	-0.024502	0.64711	0.093002	0.015603	0.56287	0.078949	0.20249	0.35347	-0.028646	-0.019844	0.45444	0.071605	-0.061436	-0.021857	0.047903	1.2465	0.1841	0.18278	0.052474	0.18905	0.25392	0.13843	0.20802	1.2767	0.1612	0.29481	-0.10492	1.0779	-0.019806	0.45048	0.29016	-0.010797	0.22398	0.68428	0.08681	0.26281	0.039476	-0.061482	0.095758	-0.17177	0.23436	-0.035652	-0.14228	0.11583
11.83261183	0.23604	0.3593	-0.048784	0.74201	-0.038329	-0.022098	0.62527	0.13453	0.023129	0.63405	0.071366	0.21358	0.36768	-0.020206	0.0035035	0.46255	0.07853	-0.038009	-0.025661	0.055829	1.1794	0.2105	0.1546	0.038702	0.15375	0.26797	0.16104	0.21509	1.2511	0.14449	0.34135	-0.098411	1.2047	-0.011179	0.6806	0.30203	-0.010296	0.25919	0.68128	0.092673	0.24807	0.040979	-0.054514	0.062666	-0.15239	0.25946	0.027154	-0.13132	0.13714
11.9047619	0.2315	0.33187	-0.063036	0.74104	-0.006385	-0.037038	0.61584	0.12533	0.015396	0.76459	0.048074	0.19933	0.33948	0.0042443	0.017645	0.45053	0.097153	-0.0096257	-0.027722	0.063397	1.091	0.23376	0.14548	0.020973	0.1243	0.2778	0.17667	0.21684	1.2013	0.13351	0.34727	-0.072859	1.3329	0.0085096	1.0562	0.26726	-0.019204	0.26417	0.63391	0.082163	0.22071	0.041459	-0.05049	0.014431	-0.1514	0.26753	0.12119	-0.15325	0.12129
11.97691198	0.22671	0.28701	-0.062008	0.75065	-0.0030386	-0.049077	0.65104	0.079508	0.0010566	0.87549	0.029059	0.17306	0.29989	0.017323	0.029103	0.41821	0.081713	0.0034933	-0.0034311	0.075298	1.0398	0.22543	0.15362	0.013048	0.11249	0.28969	0.19559	0.22602	1.2035	0.096336	0.28947	-0.048309	1.4576	0.029091	1.4866	0.22497	-0.019417	0.25238	0.54402	0.047444	0.21058	0.025916	-0.031277	0.0027285	-0.16499	0.2616	0.26757	-0.14073	0.093707
12.04906205	0.19301	0.27879	-0.056941	0.72843	-0.0065375	-0.023456	0.65635	0.056336	0.0045788	0.9314	0.026413	0.14461	0.28234	0.00536	0.027124	0.40485	0.037972	-0.0027337	0.027845	0.056445	1.0102	0.21955	0.1479	0.0003431	0.11888	0.33161	0.20016	0.24295	1.256	0.058873	0.237	-0.052853	1.5687	0.042021	1.7685	0.20703	-0.011141	0.24471	0.50189	0.033708	0.21224	-0.015821	0.019384	0.043843	-0.17571	0.2184	0.42447	-0.11693	0.080168
12.12121212	0.14498	0.28756	-0.051522	0.66225	0.0033667	-0.0034285	0.59989	0.068105	0.020495	0.91551	0.027482	0.12296	0.26756	-0.0039305	0.019983	0.39528	-0.0012783	-0.0057909	0.053939	0.025846	0.95157	0.21435	0.1378	-0.0053618	0.1412	0.39754	0.19715	0.22361	1.252	0.056065	0.22839	-0.07244	1.7018	0.068936	1.8426	0.21598	0.016642	0.2262	0.52077	0.032344	0.19339	-0.020133	0.0066418	0.094216	-0.1454	0.17839	0.4976	-0.098912	0.082041
12.19336219	0.14602	0.27846	-0.038644	0.59827	0.0058788	-0.011701	0.5415	0.073966	0.0354	0.82164	0.013171	0.10536	0.24346	0.015895	0.015239	0.38488	-0.024023	0.036685	0.093054	0.023996	0.91987	0.19871	0.1412	0.015137	0.16332	0.45124	0.19518	0.19684	1.2001	0.086342	0.22726	-0.075444	1.9546	0.097334	1.7805	0.21111	0.04545	0.19633	0.52734	0.004123	0.1804	0.023198	-0.036898	0.12965	-0.087876	0.21793	0.53561	-0.10401	0.10077
12.26551227	0.16445	0.23659	-0.0047736	0.60596	0.021119	-0.011258	0.55503	0.068762	0.036544	0.7603	0.0059741	0.11182	0.21712	0.035875	-0.011283	0.39211	-0.040534	0.076333	0.096934	0.01631	0.85078	0.20468	0.17052	0.024535	0.17465	0.43554	0.18621	0.19701	1.0647	0.10725	0.19692	-0.06731	2.2604	0.10952	1.7192	0.18886	0.033164	0.177	0.49866	-0.020451	0.1808	0.082314	-0.026111	0.16903	-0.047657	0.2688	0.56892	-0.13958	0.14767
12.33766234	0.17495	0.20179	0.0044349	0.63021	0.033511	-0.023368	0.57367	0.053925	0.05969	0.83615	0.018275	0.13345	0.22321	0.033899	-0.01556	0.41086	-0.036645	0.07817	0.076249	0.022615	0.80509	0.21716	0.21962	0.026401	0.16195	0.3841	0.1646	0.20617	0.94833	0.10503	0.13019	-0.054853	2.4343	0.088643	1.743	0.17466	0.008994	0.16974	0.45636	-0.02478	0.19037	0.10382	-0.014265	0.20734	-0.047022	0.26566	0.55212	-0.16538	0.14273
12.40981241	0.14035	0.19012	0.0010351	0.5822	0.022631	-0.034698	0.56693	0.030582	0.084796	0.9264	0.024149	0.13547	0.24141	0.050218	0.0011954	0.41767	-0.013137	0.058755	0.077843	0.019051	0.79919	0.21016	0.23147	0.025774	0.15032	0.35579	0.1424	0.20023	0.95493	0.12867	0.094887	-0.062892	2.5293	0.056044	1.8247	0.17194	0.0087753	0.14436	0.4029	-0.030728	0.16603	0.094931	-0.017605	0.2228	-0.056155	0.26346	0.5461	-0.15262	0.10288
12.48196248	0.099212	0.21851	0.01298	0.50452	-0.0022534	-0.013662	0.54203	0.033293	0.10694	0.95453	0.017368	0.12123	0.24313	0.054408	-0.0091356	0.40549	-0.0050647	0.019051	0.067653	0.030115	0.78813	0.1945	0.18779	0.020785	0.16511	0.35086	0.14015	0.18707	0.9545	0.12968	0.090756	-0.085691	2.5264	0.042088	2.0327	0.16715	0.0025658	0.12366	0.36274	-0.04887	0.12387	0.088256	-0.00073673	0.24004	-0.01368	0.29029	0.53308	-0.13078	0.103
12.55411255	0.11577	0.3617	0.036638	0.4527	-0.015596	0.0052886	0.54541	0.061209	0.11166	0.9346	0.0062479	0.098325	0.21182	0.034997	-0.017125	0.41992	-0.024729	-0.01382	0.031943	0.049069	0.74786	0.16808	0.1462	0.020403	0.18832	0.35889	0.17632	0.16828	0.90461	0.13392	0.10054	-0.10157	2.4136	0.040483	2.2907	0.16981	-0.011837	0.10827	0.34417	-0.050038	0.10223	0.11108	0.0068081	0.23515	0.064528	0.33856	0.52358	-0.13455	0.14494
12.62626263	0.14076	0.66494	0.045654	0.42866	-0.017904	0.020785	0.56826	0.093146	0.11759	0.87945	-0.0071051	0.069639	0.20991	0.013926	-0.030227	0.4283	-0.0084743	-0.032099	-0.0051869	0.041038	0.72609	0.1292	0.13809	0.036464	0.21412	0.38172	0.19501	0.14556	0.86519	0.1447	0.11092	-0.091129	2.2696	0.033941	2.4349	0.16073	-0.01708	0.088641	0.31623	-0.030468	0.12054	0.13163	0.054043	0.2223	0.10205	0.37621	0.5333	-0.1299	0.15433
12.6984127	0.15136	0.9569	0.027245	0.43076	-0.0015668	0.039952	0.57276	0.13834	0.12496	0.84676	-0.012913	0.06374	0.24285	0.024842	-0.041807	0.39364	0.023577	-0.029103	-0.012578	0.035254	0.66981	0.10346	0.14019	0.037432	0.22892	0.35443	0.16192	0.13888	0.84174	0.16098	0.10753	-0.068532	2.1041	0.0052344	2.3707	0.1223	-0.01835	0.091414	0.28558	-0.014219	0.1054	0.11668	0.11395	0.2472	0.10925	0.34461	0.51316	-0.096885	0.13273
12.77056277	0.16776	1.1155	0.0094392	0.42893	0.046768	0.046897	0.52438	0.16347	0.13523	0.82841	-0.018346	0.06205	0.23719	0.0466	-0.027251	0.35032	0.021648	-0.021935	0.011732	0.049757	0.61357	0.11386	0.13168	0.01358	0.24392	0.30733	0.10648	0.15396	0.75317	0.13901	0.098248	-0.094537	1.9489	-0.021355	2.2029	0.090393	-0.035915	0.10546	0.26857	0.010509	0.055901	0.083308	0.12313	0.29417	0.12132	0.30092	0.52483	-0.065411	0.11559
12.84271284	0.17302	1.1326	0.0093528	0.45508	0.074604	0.054145	0.48593	0.14431	0.13265	0.78761	-0.017937	0.069923	0.20636	0.045775	-0.0079037	0.30107	0.009056	-0.0070233	0.058302	0.048905	0.60825	0.13363	0.12865	-0.031279	0.26066	0.27019	0.078139	0.15685	0.66284	0.10411	0.12196	-0.12543	1.8704	-0.026224	2.1601	0.080473	-0.065128	0.09995	0.23909	0.0094702	0.034806	0.070873	0.073762	0.32512	0.15297	0.28909	0.51345	-0.035498	0.13521
12.91486291	0.15905	1.0946	0.043514	0.44054	0.029019	0.065374	0.48625	0.1097	0.11578	0.76095	-0.0037773	0.085303	0.16757	0.03246	-0.012416	0.28224	0.0077901	0.025232	0.080238	0.039079	0.60603	0.14503	0.12073	-0.076688	0.25207	0.24485	0.10975	0.13138	0.60359	0.11539	0.13092	-0.11849	1.8017	-0.013445	2.1768	0.070091	-0.086647	0.085086	0.20247	-0.016482	0.079048	0.085712	0.025443	0.34943	0.16695	0.29145	0.44705	-0.0030873	0.16695
12.98701299	0.14933	1.027	0.082818	0.38699	-0.019539	0.059076	0.47445	0.08549	0.12732	0.78663	0.015622	0.085233	0.12403	0.028079	-0.033761	0.28433	0.02385	0.044244	0.068494	0.029278	0.58672	0.15611	0.13182	-0.085465	0.24206	0.23584	0.13346	0.11455	0.58471	0.12516	0.11231	-0.10285	1.727	-0.014354	2.1057	0.058709	-0.071717	0.078525	0.16882	-0.015562	0.1538	0.11555	0.001261	0.35786	0.13463	0.24476	0.43497	0.006158	0.1637
13.05916306	0.15895	0.94143	0.093196	0.34506	-0.03097	0.069728	0.4383	0.081606	0.19239	0.76968	0.036519	0.093759	0.12648	0.055256	-0.046351	0.25711	0.042597	0.070036	0.083384	0.046273	0.53752	0.17492	0.1669	-0.059964	0.22901	0.24829	0.15026	0.11143	0.59555	0.11043	0.048706	-0.096048	1.6548	-0.016437	2.0217	0.03908	-0.05155	0.063131	0.16	0.017908	0.1904	0.16358	-0.012244	0.32386	0.073306	0.20592	0.46305	-0.026748	0.16558
13.13131313	0.16759	0.8668	0.088495	0.39422	-0.029488	0.098902	0.39496	0.096767	0.27483	0.69952	0.028917	0.12539	0.11188	0.078592	-0.031109	0.19397	0.062684	0.080007	0.10778	0.078706	0.53955	0.17906	0.18708	-0.0077023	0.21526	0.25278	0.17112	0.094427	0.58273	0.074294	0.014196	-0.078702	1.547	-0.01868	1.9331	0.01861	-0.053741	0.034624	0.14263	0.057151	0.14855	0.22311	0.010047	0.29172	0.048313	0.22934	0.49564	-0.046579	0.20006
13.2034632	0.18209	0.83619	0.090333	0.50621	-0.009889	0.11049	0.37338	0.11012	0.3115	0.67781	-0.01234	0.13776	0.071313	0.066968	0.004169	0.14607	0.064437	0.093911	0.083502	0.081042	0.53423	0.18704	0.18984	0.0067033	0.2067	0.21705	0.17483	0.079002	0.56246	0.06037	0.018927	-0.064592	1.4024	-0.033172	1.8747	0.019608	-0.05627	0.025699	0.10673	0.1079	0.097271	0.23021	0.037568	0.2637	0.04226	0.29721	0.48355	-0.023074	0.1812
13.27561328	0.1786	0.82261	0.09356	0.55103	0.023304	0.091875	0.37526	0.11826	0.32074	0.68268	-0.046813	0.13738	0.039541	0.055157	0.015303	0.11046	0.0062609	0.10367	0.071784	0.046284	0.48808	0.20096	0.18596	0.00078792	0.19331	0.17531	0.1504	0.11238	0.57709	0.052601	0.042487	-0.069177	1.2794	-0.044572	1.7755	0.014475	-0.072137	0.036066	0.10565	0.16415	0.079994	0.18515	0.011106	0.2403	0.027597	0.30859	0.41489	0.0052063	0.10048
13.34776335	0.14485	0.79047	0.082486	0.55279	0.023759	0.084349	0.38463	0.13234	0.31265	0.68552	-0.037158	0.14604	0.059787	0.06516	0.01643	0.0843	-0.056215	0.079613	0.10016	0.011838	0.47024	0.19237	0.17303	-0.001476	0.16406	0.15184	0.10212	0.13789	0.58724	0.040955	0.073179	-0.063173	1.189	-0.045542	1.6309	-0.0017559	-0.097721	0.0189	0.15613	0.21012	0.12043	0.12541	-0.0079301	0.2227	0.038444	0.23982	0.3935	0.043278	0.027202
13.41991342	0.11445	0.80657	0.095207	0.56259	0.011581	0.074742	0.38035	0.14013	0.28653	0.67426	-0.0024735	0.11405	0.1035	0.065963	0.039956	0.085812	-0.06684	0.054226	0.12022	-0.0020323	0.4541	0.18094	0.16898	-0.0026768	0.14263	0.14249	0.073154	0.10759	0.54687	0.052563	0.08863	-0.042138	1.1223	-0.033584	1.5248	-0.0043418	-0.10037	-0.0053752	0.20753	0.20637	0.20784	0.10726	0.003004	0.20168	0.093264	0.15927	0.40957	0.096593	0.061756
13.49206349	0.11202	0.82081	0.1106	0.54911	0.014397	0.079656	0.33729	0.13733	0.2682	0.63401	0.018625	0.088577	0.1356	0.052997	0.086315	0.089275	-0.069589	0.043333	0.11272	-0.0019126	0.46399	0.17788	0.19876	-0.0058478	0.12359	0.1432	0.046331	0.082263	0.51911	0.099168	0.078198	-0.035306	1.0718	-0.032065	1.4815	0.019442	-0.094945	0.00048239	0.23825	0.16063	0.27058	0.12243	0.026603	0.20282	0.13182	0.1477	0.39728	0.14002	0.1189
13.56421356	0.13246	0.78319	0.080605	0.53564	0.033597	0.090244	0.29794	0.12166	0.26474	0.54964	0.034305	0.09965	0.14821	0.055556	0.12193	0.086504	-0.078157	0.06797	0.075015	0.0099481	0.51886	0.18844	0.2495	-0.0042212	0.094149	0.13008	0.014056	0.093225	0.53053	0.18603	0.061941	-0.030517	1.0164	-0.054024	1.3914	0.05851	-0.10948	0.011687	0.24764	0.1344	0.23018	0.13621	0.020827	0.22955	0.16123	0.15438	0.35095	0.16249	0.14859
13.63636364	0.13086	0.7234	0.054594	0.51569	0.032496	0.079095	0.30798	0.12854	0.25657	0.49641	0.048383	0.12421	0.1321	0.070795	0.11947	0.071091	-0.086923	0.065803	0.033177	0.020195	0.55799	0.21163	0.26956	0.010593	0.075624	0.12623	-0.0017345	0.114	0.5974	0.22364	0.061154	-0.016011	0.96609	-0.066007	1.2767	0.090885	-0.12254	-0.011017	0.24533	0.13064	0.17148	0.089027	-0.016464	0.22415	0.18138	0.13529	0.3397	0.17038	0.1449
13.70851371	0.1338	0.71818	0.047845	0.48316	0.015715	0.083404	0.32055	0.11671	0.21696	0.49162	0.043983	0.15794	0.11454	0.10164	0.098195	0.053264	-0.095052	0.039746	0.038651	0.019114	0.55067	0.20154	0.24613	0.017709	0.077283	0.15429	0.011059	0.10402	0.63986	0.19298	0.069524	-0.015385	0.93558	-0.055151	1.2154	0.092383	-0.13573	-0.054245	0.24026	0.12375	0.13846	0.0101	-0.013372	0.20985	0.17434	0.1032	0.37094	0.14194	0.13279
13.78066378	0.1666	0.72503	0.087624	0.46486	0.02356	0.1232	0.31432	0.082448	0.19066	0.48651	0.02491	0.17206	0.11226	0.14266	0.065379	0.06	-0.080011	0.027881	0.051718	0.018583	0.51672	0.16868	0.1984	-0.011236	0.09827	0.16419	0.051625	0.094716	0.59553	0.16852	0.072346	-0.031153	0.9621	-0.050678	1.1528	0.088829	-0.13353	-0.049801	0.2475	0.10785	0.11288	0.035571	0.012438	0.2316	0.13625	0.11079	0.36812	0.12334	0.17258
13.85281385	0.17494	0.68221	0.14147	0.4797	0.024366	0.11332	0.3101	0.061879	0.19534	0.46295	0.0077219	0.17332	0.11938	0.16356	0.043027	0.069909	-0.046387	0.013297	0.027026	0.021234	0.48258	0.17253	0.17613	-0.011874	0.12628	0.15422	0.08614	0.099475	0.50494	0.17161	0.075956	-0.044753	0.93064	-0.059195	1.0624	0.083241	-0.12742	-0.017222	0.25235	0.10626	0.12809	0.11647	0.011959	0.24638	0.10452	0.10248	0.34036	0.12193	0.21134
13.92496392	0.1347	0.62164	0.17175	0.50224	0.013926	0.12243	0.31123	0.060235	0.19636	0.3994	0.0064944	0.19646	0.13486	0.15827	0.057751	0.047872	-0.010777	0.012559	0.0051212	0.036779	0.43349	0.2008	0.20324	0.023814	0.15647	0.15624	0.093129	0.095387	0.39688	0.15683	0.093421	-0.033539	0.81252	-0.076392	0.98441	0.063073	-0.11921	-0.025838	0.22842	0.08069	0.14742	0.14917	0.028195	0.22738	0.12845	0.0054331	0.32063	0.10254	0.19764
13.997114	0.11254	0.59394	0.16992	0.46125	0.029152	0.16631	0.30166	0.068482	0.18838	0.34901	0.012012	0.22969	0.14072	0.13457	0.097696	0.024489	0.022138	0.027808	0.016233	0.02601	0.38931	0.20375	0.23415	0.040282	0.18624	0.15191	0.0683	0.074084	0.41998	0.14288	0.078345	-0.011381	0.70666	-0.061754	0.95328	0.049413	-0.11284	-0.032406	0.17568	0.037497	0.1225	0.16398	0.0034082	0.18558	0.18448	-0.042283	0.26815	0.066993	0.16551
14.06926407	0.13855	0.58033	0.17217	0.40812	0.035611	0.17788	0.27522	0.064199	0.16439	0.33451	0.019064	0.24285	0.14445	0.10577	0.11216	0.027872	0.030765	0.022695	0.020589	0.0041346	0.36251	0.2089	0.24556	0.020924	0.18601	0.15232	0.055899	0.068855	0.59847	0.1624	0.062098	-0.0098538	0.66719	-0.040895	0.92218	0.063592	-0.12258	-0.024513	0.16327	0.028921	0.11007	0.158	-0.01479	0.14016	0.18533	0.0095917	0.20591	0.063709	0.16067
14.14141414	0.14378	0.54772	0.16214	0.43835	0.047283	0.13138	0.24808	0.057689	0.13619	0.33099	0.039038	0.20943	0.1318	0.088574	0.10459	0.035351	0.039331	0.010581	0.015011	0.02032	0.36155	0.23858	0.22939	0.016754	0.17139	0.17804	0.067225	0.073282	0.75263	0.23103	0.088635	-0.016619	0.63557	-0.038274	0.88078	0.19282	-0.13647	-0.060858	0.17358	0.026103	0.11768	0.14327	-0.013951	0.14215	0.18152	0.07517	0.13862	0.061567	0.16476
14.21356421	0.13722	0.51151	0.13956	0.46622	0.050556	0.071947	0.26456	0.053769	0.12126	0.3287	0.062486	0.19575	0.10276	0.093426	0.10766	0.018801	0.0411	-0.0012966	0.010336	0.01794	0.47818	0.26114	0.22135	0.030773	0.17718	0.21883	0.084461	0.088298	0.83672	0.31167	0.10891	-0.032119	0.61578	-0.055788	0.82909	0.42316	-0.15022	-0.077682	0.14512	0.014269	0.095146	0.1125	-0.070904	0.17642	0.17081	0.10902	0.1139	0.028244	0.14568
14.28571429	0.14539	0.48189	0.13978	0.42504	0.026634	0.050392	0.30199	0.053216	0.13168	0.32862	0.064907	0.19166	0.077867	0.099392	0.12219	0.012664	0.030788	0.0037764	0.040403	0.008162	0.65855	0.27505	0.2372	0.019586	0.16544	0.24421	0.087195	0.10507	0.89602	0.31787	0.107	-0.038887	0.60627	-0.057049	0.78173	0.60037	-0.16152	-0.020524	0.11551	0.042684	0.062078	0.067538	-0.072373	0.20708	0.16064	0.092344	0.14858	0.0021862	0.14545
14.35786436	0.12556	0.47028	0.11907	0.39914	0.0066516	0.046396	0.30429	0.056873	0.13584	0.30525	0.048857	0.17183	0.083588	0.088566	0.12481	0.034089	0.061258	0.017014	0.094144	0.00388	0.74118	0.2789	0.26414	-0.013562	0.14142	0.24106	0.080022	0.10482	0.93562	0.28663	0.084997	-0.030354	0.57153	-0.030145	0.73253	0.7204	-0.15658	0.046307	0.14705	0.10489	0.12123	0.084136	-0.050153	0.2008	0.14475	0.057242	0.16306	-0.023537	0.19269
14.43001443	0.084297	0.49194	0.084094	0.39452	-0.0042404	0.042495	0.30164	0.051314	0.12321	0.25242	0.054494	0.16331	0.10669	0.076	0.128	0.056141	0.12396	0.022144	0.10297	0.015663	0.73692	0.27107	0.28129	-0.026814	0.12717	0.21358	0.081702	0.12628	0.89244	0.27811	0.050599	-0.017167	0.5446	0.014713	0.67263	0.93477	-0.1342	0.050133	0.25726	0.18539	0.18389	0.11748	-0.047067	0.2076	0.12093	0.08372	0.1193	-0.053481	0.21506
14.5021645	0.068179	0.49443	0.10888	0.36045	-0.00024686	0.06718	0.32329	0.038873	0.11959	0.22452	0.049524	0.1632	0.12717	0.09825	0.11773	0.072038	0.13176	0.010916	0.038716	0.06011	0.65621	0.26456	0.29696	-0.011839	0.11805	0.1992	0.093027	0.16731	0.81808	0.25852	0.040438	0.0039428	0.5373	0.040254	0.62037	1.1994	-0.12767	0.040111	0.32275	0.2296	0.16542	0.11103	-0.065982	0.23473	0.12648	0.116	0.095386	-0.096413	0.1953
14.57431457	0.07284	0.48276	0.14818	0.31206	0.0073646	0.075683	0.3181	0.042868	0.15248	0.23926	0.025203	0.15751	0.13159	0.12407	0.1111	0.077988	0.079079	0.027026	-0.0075442	0.056633	0.5952	0.27272	0.29428	0.017703	0.117	0.21079	0.098171	0.16736	0.73967	0.22002	0.049425	-0.0033054	0.5435	0.027312	0.61138	1.3638	-0.13371	0.066416	0.30776	0.22847	0.13364	0.12277	-0.074774	0.26375	0.15673	0.089823	0.11708	-0.11845	0.14346
14.64646465	0.053821	0.45028	0.16125	0.26644	0.0033182	0.029475	0.29575	0.047582	0.16906	0.26774	0.0065703	0.1476	0.1232	0.10997	0.1075	0.084457	0.030828	0.019811	-0.012046	0.023481	0.60612	0.26195	0.28018	0.024536	0.13901	0.23984	0.10827	0.14159	0.71866	0.18336	0.045425	-0.029878	0.56369	0.023766	0.62189	1.4307	-0.13638	0.10353	0.30033	0.23791	0.12872	0.12279	-0.037251	0.27068	0.16688	0.086886	0.12681	-0.10206	0.1242
14.71861472	0.042387	0.38511	0.15525	0.24553	0.010179	0.019507	0.27035	0.046965	0.14948	0.25505	0.019145	0.12919	0.11822	0.076856	0.13082	0.097577	-0.00079283	-0.026703	-0.0085185	0.019074	0.62	0.21426	0.27429	0.034511	0.15139	0.27784	0.12167	0.14629	0.75246	0.17126	0.053142	-0.047397	0.57671	0.037365	0.58652	1.4585	-0.11569	0.15823	0.32499	0.26287	0.11836	0.075732	-0.019712	0.20774	0.16001	0.13737	0.12066	-0.076173	0.16979
14.79076479	0.060949	0.36943	0.14852	0.2364	0.034109	0.045897	0.27799	0.040449	0.1314	0.21567	0.049548	0.10682	0.1066	0.049795	0.1546	0.092987	-0.011873	-0.057012	0.0042125	0.014598	0.63709	0.19492	0.25766	0.040804	0.13548	0.31297	0.14087	0.1587	0.75708	0.15965	0.060361	-0.062683	0.58295	0.042789	0.52439	1.4289	-0.1183	0.22782	0.33275	0.28006	0.089264	0.02422	-0.032579	0.17373	0.17646	0.15745	0.11763	-0.090323	0.18482
14.86291486	0.06299	0.38541	0.15553	0.23301	0.041169	0.056976	0.27983	0.026292	0.12588	0.17823	0.059335	0.11717	0.10671	0.039473	0.14118	0.087721	-0.0059674	-0.022044	0.027922	0.0014849	0.61436	0.19921	0.23419	0.059162	0.12504	0.32326	0.15439	0.14284	0.68529	0.13269	0.043156	-0.070048	0.55547	0.021932	0.49087	1.3476	-0.13281	0.30759	0.2975	0.26028	0.090088	0.027279	-0.044998	0.17543	0.19415	0.14581	0.076328	-0.12512	0.14264
14.93506494	0.041467	0.37271	0.15461	0.2556	0.038727	0.07566	0.25249	0.0099903	0.12907	0.15114	0.066574	0.13958	0.10834	0.027004	0.12366	0.080457	-0.024551	0.045102	0.050343	-0.018992	0.56559	0.20216	0.2358	0.089491	0.12916	0.30648	0.15104	0.12369	0.6655	0.11899	0.028333	-0.077432	0.49774	0.0025961	0.48594	1.2949	-0.11771	0.37765	0.24394	0.2243	0.12898	0.032859	-0.048789	0.15612	0.21829	0.17696	0.057731	-0.15113	0.12335
15.00721501	0.049271	0.32445	0.11871	0.27482	0.050919	0.088303	0.22845	0.0027646	0.14611	0.15934	0.060487	0.14195	0.11637	0.0090835	0.11491	0.073762	-0.04845	0.065951	0.062772	-0.037797	0.51635	0.20069	0.23201	0.10873	0.126	0.31733	0.1587	0.1293	0.70301	0.10061	0.031917	-0.072045	0.43875	0.013328	0.46803	1.2934	-0.08844	0.43508	0.20843	0.20325	0.1202	0.01319	-0.041503	0.12017	0.23557	0.20504	0.05591	-0.14463	0.13089
15.07936508	0.072465	0.28202	0.10217	0.27052	0.066445	0.067157	0.23371	0.0056572	0.16399	0.19722	0.04117	0.14155	0.12239	-0.010447	0.11545	0.053843	-0.044397	0.051844	0.047422	-0.021566	0.48428	0.19145	0.20769	0.090576	0.12904	0.34107	0.18868	0.1647	0.73686	0.10112	0.059293	-0.055682	0.38774	0.037978	0.42119	1.2848	-0.060297	0.46947	0.17585	0.17978	0.10125	0.016296	-0.051949	0.096752	0.26455	0.22945	0.043975	-0.10909	0.13781
15.15151515	0.072172	0.2479	0.083291	0.2303	0.062461	0.051983	0.21026	0.030083	0.15663	0.20296	0.041634	0.12697	0.096715	-0.031387	0.11402	0.031492	-0.031032	0.048248	0.016312	0.02049	0.47016	0.21487	0.19148	0.072852	0.14243	0.35068	0.2203	0.21689	0.71336	0.11508	0.10806	-0.038012	0.37319	0.042855	0.40562	1.2793	-0.048423	0.50154	0.1454	0.16659	0.085553	0.017508	-0.078588	0.077094	0.32216	0.27335	0.040184	-0.10664	0.12157
15.22366522	0.052699	0.21828	0.060481	0.20919	0.06834	0.055268	0.18193	0.040612	0.15989	0.15596	0.041655	0.11883	0.068256	-0.02118	0.11423	0.010289	-0.011286	0.051623	0.0021572	0.05498	0.46316	0.25449	0.1869	0.089265	0.13804	0.36107	0.24525	0.23892	0.69585	0.10896	0.16466	-0.026524	0.41636	0.060823	0.40576	1.2701	-0.024087	0.55529	0.14732	0.1782	0.11577	0.027312	-0.064564	0.069787	0.41305	0.28755	0.046432	-0.14259	0.11802
15.2958153	0.056634	0.22457	0.057353	0.23286	0.080745	0.067164	0.20172	0.043162	0.17106	0.12083	0.038934	0.11077	0.040651	0.0086506	0.11491	0.0059084	0.0199	0.038276	0.025925	0.059908	0.43731	0.25577	0.17629	0.10152	0.11278	0.34984	0.22357	0.23322	0.70732	0.10209	0.22274	-0.015777	0.5325	0.06857	0.38572	1.2805	0.0044694	0.60452	0.15694	0.19845	0.19303	0.040198	-0.043938	0.094357	0.50978	0.25485	0.066505	-0.1618	0.15556
15.36796537	0.078859	0.21325	0.072767	0.24478	0.059832	0.06335	0.20269	0.040881	0.14515	0.11916	0.037045	0.11069	0.032229	0.0023081	0.10136	0.016256	0.021315	0.014813	0.036014	0.069945	0.38783	0.23684	0.16907	0.067647	0.098769	0.30875	0.18842	0.21858	0.74593	0.14437	0.23577	-0.012103	0.64819	0.057302	0.35574	1.2704	-0.0085648	0.63003	0.14846	0.18768	0.23214	0.043831	-0.061084	0.12974	0.52584	0.22217	0.05226	-0.15499	0.18897
15.44011544	0.075841	0.19166	0.090179	0.21295	0.027753	0.055513	0.16971	0.022675	0.12778	0.12196	0.014355	0.11125	0.027918	-0.003155	0.09568	0.027428	-0.0011897	-0.0020137	-0.00012502	0.091788	0.35953	0.24612	0.18271	0.019299	0.10576	0.26868	0.16391	0.20895	0.76075	0.24199	0.21776	-0.0015019	0.69426	0.052271	0.3291	1.2624	-0.039215	0.60791	0.14862	0.15295	0.25002	0.041311	-0.076396	0.16411	0.47489	0.22707	0.033219	-0.13798	0.18835
15.51226551	0.065975	0.17884	0.081119	0.19895	0.036915	0.056301	0.15383	0.017218	0.12421	0.1365	-0.0036319	0.086385	0.00011214	0.0084243	0.095279	0.04561	-0.021523	0.012088	-0.0082384	0.082909	0.37045	0.272	0.20826	0.0039008	0.12168	0.28151	0.15113	0.21915	0.7357	0.33204	0.20779	0.028408	0.71348	0.0803	0.31989	1.2636	0.0024834	0.57955	0.1348	0.13725	0.26562	0.017652	-0.071858	0.20482	0.45574	0.18911	0.062883	-0.1308	0.14182
15.58441558	0.064497	0.19305	0.046894	0.2126	0.12652	0.055378	0.14142	0.010307	0.099256	0.12975	-0.0065064	0.042267	-0.0022503	0.0013165	0.078508	0.062385	-0.032716	0.021596	0.006322	0.03922	0.36503	0.27615	0.20032	0.020477	0.13944	0.35497	0.17322	0.21965	0.71481	0.3371	0.20424	0.062413	0.75949	0.12576	0.33096	1.3112	0.13005	0.59579	0.12704	0.12802	0.30228	-0.014378	-0.072563	0.21915	0.44637	0.14855	0.11261	-0.13936	0.089027
15.65656566	0.076165	0.22236	0.026155	0.22245	0.22049	0.046019	0.11666	0.0038097	0.081821	0.10056	0.011253	0.028602	-0.0033712	0.004281	0.06325	0.065394	-0.0098391	0.0067152	0.031672	0.0067277	0.33122	0.2443	0.16295	0.04512	0.16711	0.39978	0.20429	0.19717	0.68707	0.29877	0.16602	0.067157	0.8158	0.15464	0.34684	1.5229	0.25625	0.64388	0.13609	0.086574	0.32121	0.0092415	-0.094351	0.18048	0.43502	0.19309	0.12719	-0.15244	0.076494
15.72871573	0.065997	0.25167	0.0013367	0.23812	0.24858	0.025156	0.11084	0.010931	0.078631	0.075561	0.023893	0.060674	-0.015793	0.030369	0.09007	0.06088	-0.003401	0.02106	0.049305	0.021766	0.29341	0.20708	0.13872	0.062424	0.18272	0.37465	0.20311	0.18995	0.71046	0.28283	0.15393	0.06247	0.79916	0.15733	0.33263	1.8114	0.30587	0.681	0.13218	0.028963	0.30055	0.035133	-0.12987	0.13956	0.44662	0.24813	0.11562	-0.13455	0.069962
15.8008658	0.048695	0.22728	0.0090527	0.25229	0.23472	0.034811	0.12351	0.03417	0.061669	0.044435	0.03777	0.092826	-0.0082864	0.039716	0.10988	0.052466	-0.029172	0.051179	0.064118	0.057643	0.30146	0.19901	0.13752	0.082504	0.1766	0.29615	0.17567	0.18283	0.87741	0.30085	0.1594	0.082843	0.73933	0.1653	0.31193	1.9857	0.34328	0.68416	0.14565	0.0029745	0.30572	0.021912	-0.12921	0.13539	0.47487	0.27174	0.09426	-0.12668	0.080306
15.87301587	0.049336	0.18386	0.050452	0.24548	0.2257	0.053444	0.12675	0.042588	0.054876	0.071489	0.03486	0.092052	-0.0030252	0.022352	0.088591	0.050111	-0.039372	0.04862	0.081253	0.068676	0.32515	0.20718	0.13906	0.10617	0.15834	0.23193	0.16789	0.15695	1.2697	0.33929	0.16941	0.11918	0.73316	0.18929	0.31268	2.1263	0.41313	0.68549	0.16752	0.013155	0.30543	0.028454	-0.074869	0.15343	0.47132	0.29246	0.079189	-0.12808	0.091354
15.94516595	0.053443	0.16173	0.061873	0.24973	0.21916	0.052385	0.11818	0.025547	0.077714	0.17349	0.02378	0.076209	-0.019256	0.018116	0.065634	0.059933	-0.029699	0.055746	0.073214	0.051469	0.32857	0.20189	0.1374	0.094545	0.14743	0.229	0.1687	0.1376	1.6585	0.35383	0.17534	0.12469	0.74866	0.20946	0.3052	2.2467	0.47095	0.66888	0.16593	0.032929	0.29909	0.031983	-0.040414	0.12939	0.43544	0.2762	0.06261	-0.090878	0.060892
16.01731602	0.021653	0.1561	0.046308	0.25683	0.21972	0.070865	0.099844	-0.0025894	0.11149	0.3105	0.040318	0.067192	-0.026738	0.012026	0.070333	0.06743	-0.014705	0.039696	0.024408	0.031432	0.32663	0.19678	0.13146	0.059136	0.16359	0.24716	0.16438	0.11521	1.8078	0.37119	0.17826	0.11872	0.71705	0.21167	0.26708	2.2855	0.48421	0.65176	0.15226	0.047125	0.33272	0.034769	-0.017998	0.081222	0.37288	0.26961	0.035507	-0.065258	0.022425
16.08946609	0.00014842	0.18514	0.039241	0.25551	0.23419	0.089414	0.094707	-0.0016658	0.14125	0.41556	0.081175	0.065127	-0.030894	0.0011071	0.055104	0.039493	-0.020297	0.0022924	-0.023547	0.044738	0.38561	0.17375	0.10199	0.024034	0.19032	0.27158	0.18767	0.12708	1.8128	0.3874	0.19728	0.12812	0.6422	0.20828	0.22961	2.4424	0.47322	0.67292	0.12612	0.033197	0.37923	0.053914	-0.028975	0.095013	0.30826	0.29333	-0.013127	-0.079503	-0.0055206
16.16161616	0.015951	0.20375	0.031779	0.25612	0.25461	0.066982	0.11131	0.011946	0.23619	0.50925	0.098671	0.084234	-0.030818	0.020873	0.019926	0.0098578	-0.015925	-0.0091266	-0.037694	0.054092	0.56535	0.14685	0.096702	0.017258	0.17945	0.29693	0.20898	0.13732	1.8276	0.38909	0.20318	0.1313	0.61227	0.19415	0.21913	2.7681	0.45907	0.69625	0.099336	0.0031373	0.39746	0.051269	-0.014168	0.13498	0.30585	0.31084	-0.034206	-0.1154	0.0057378
16.23376623	0.035269	0.16569	0.0014158	0.28062	0.23359	0.034018	0.12751	-0.0045284	0.39387	0.66472	0.089001	0.084649	-0.029784	0.054393	0.036726	0.0053386	0.009288	-0.0019926	-0.020747	0.071908	0.77261	0.1449	0.12941	0.055832	0.16173	0.30277	0.22012	0.11809	1.8872	0.38528	0.2376	0.13119	0.59038	0.19701	0.22078	2.9564	0.44486	0.69811	0.089295	0.0061553	0.40596	0.029555	0.020444	0.12322	0.36171	0.33946	-0.031658	-0.11933	0.027378
16.30591631	0.037883	0.11996	-0.0027693	0.32163	0.15659	0.033019	0.12403	-0.010001	0.4625	0.72528	0.064619	0.06862	-0.03591	0.072505	0.071373	0.020264	0.026872	-0.0033877	-0.0062492	0.076684	0.87757	0.14567	0.14451	0.099547	0.13966	0.29773	0.23998	0.10377	1.7671	0.36463	0.28546	0.12524	0.53045	0.19603	0.22279	2.8933	0.42159	0.69855	0.058926	0.0049521	0.3993	0.049385	0.02643	0.10105	0.4225	0.35167	-0.0056991	-0.059483	0.0075998
16.37806638	0.052372	0.13011	0.003419	0.33659	0.1129	0.03287	0.1056	0.0038709	0.50438	0.71553	0.026462	0.038862	-0.034043	0.1522	0.084575	0.020504	0.038712	-0.0041561	-0.024215	0.041404	0.88928	0.10851	0.11004	0.12005	0.10031	0.27864	0.25377	0.10192	1.5576	0.34765	0.3216	0.11113	0.47779	0.18363	0.23081	2.7538	0.40243	0.63746	0.057963	-0.0049165	0.365	0.083092	0.009222	0.092172	0.44196	0.31726	0.023722	0.064627	-0.012128
16.45021645	0.065992	0.20818	0.038745	0.31493	0.1344	-0.00086803	0.085231	0.02217	0.53835	0.70004	0.0067848	0.0033439	-0.02741	0.32962	0.091316	-0.0017562	0.031098	-0.0062906	-0.071933	0.024137	0.96782	0.047076	0.075137	0.10008	0.077401	0.2904	0.25625	0.1085	1.5264	0.34169	0.33002	0.10597	0.44947	0.17673	0.2235	2.6415	0.46211	0.54609	0.093404	-0.013408	0.33649	0.097614	0.019582	0.060074	0.4325	0.25991	0.049982	0.25754	-0.026943
16.52236652	0.060886	0.2785	0.064811	0.29943	0.13918	-0.0015648	0.083574	0.023682	0.55396	0.73341	0.01106	-0.017674	-0.00051453	0.45122	0.089211	0.0042009	0.024565	-0.029779	-0.10116	0.033362	1.0877	0.01726	0.078475	0.05215	0.074241	0.30648	0.27025	0.12275	1.5707	0.29682	0.35127	0.10937	0.42962	0.16201	0.20824	2.5624	0.66162	0.53045	0.109	-0.053207	0.28974	0.087302	0.0091716	0.032708	0.4218	0.26133	0.086536	0.44007	-0.048201
16.59451659	0.07773	0.28886	0.044467	0.33585	0.12342	0.0058202	0.1114	0.022985	0.54575	0.73781	0.0055701	-0.021785	0.0042777	0.48725	0.091314	0.038109	0.019199	-0.058522	-0.070366	0.01874	1.1974	0.012676	0.090843	0.056059	0.069619	0.31221	0.3302	0.13292	1.5074	0.231	0.38917	0.12149	0.4245	0.12862	0.21321	2.4407	0.88076	0.52616	0.11234	-0.06254	0.24249	0.10253	-0.0085798	0.043104	0.40913	0.28118	0.10845	0.59073	-0.088173
16.66666667	0.11526	0.26588	0.018991	0.34629	0.14695	0.0054229	0.10962	0.0284	0.50394	0.70458	0.0138	-0.011278	-0.0046023	0.46708	0.081109	0.054701	-0.0071728	-0.074446	-0.049793	0.012265	1.2938	0.021213	0.11484	0.10632	0.060133	0.30877	0.37763	0.12614	1.3654	0.16915	0.3827	0.13792	0.42095	0.10084	0.22098	2.3035	1.0465	0.47091	0.13185	-0.031989	0.24754	0.1143	0.0065312	0.040518	0.40717	0.30487	0.10043	0.76315	-0.143
16.73881674	0.10532	0.25954	0.005242	0.32406	0.18881	-0.0058193	0.066655	0.025158	0.50089	0.67134	0.018095	0.0064817	-0.005055	0.40827	0.056943	0.073187	-0.016955	-0.077521	-0.079453	0.022403	1.3908	0.040959	0.13136	0.14085	0.070655	0.27101	0.34964	0.13489	1.3266	0.15514	0.33905	0.15197	0.38207	0.079828	0.21073	2.2011	1.2909	0.40901	0.14623	-0.021953	0.26514	0.11294	0.05365	0.032386	0.40891	0.32801	0.095932	0.93562	-0.17099
16.81096681	0.067551	0.26696	-0.0058209	0.31433	0.20566	-0.010091	0.05069	0.017341	0.5402	0.60995	0.0050635	0.022784	-0.025865	0.31673	0.033246	0.097539	-0.028095	-0.079929	-0.11055	0.027057	1.4585	0.031063	0.11484	0.22529	0.079935	0.21977	0.27559	0.15579	1.3547	0.18437	0.31234	0.15822	0.30736	0.069536	0.19755	2.1512	1.5864	0.36625	0.12056	-0.050525	0.2346	0.10147	0.13226	0.060594	0.40979	0.31638	0.08843	1.0378	-0.15811
16.88311688	0.036285	0.24295	-0.0032514	0.31983	0.19874	-0.023458	0.045126	0.019122	0.5236	0.54762	-0.018131	0.0055785	-0.058834	0.2342	0.03428	0.08658	-0.024056	-0.073273	-0.086659	0.018404	1.4465	0.0072677	0.10012	0.3613	0.06902	0.15843	0.21077	0.1753	1.312	0.17792	0.31302	0.1552	0.24553	0.065699	0.18416	2.0645	1.7271	0.34324	0.091313	-0.088988	0.21372	0.10837	0.17737	0.083765	0.40693	0.31759	0.10385	1.0809	-0.11957
16.95526696	0.030958	0.20033	0.0097557	0.30199	0.21973	-0.037252	0.053625	0.01143	0.45716	0.5048	-0.031396	-0.028918	-0.069233	0.26363	0.056199	0.05765	-0.013386	-0.049665	-0.045768	-0.021576	1.4056	0.0079912	0.12299	0.39545	0.089003	0.1255	0.20398	0.16883	1.2462	0.16023	0.30024	0.15375	0.21814	0.048094	0.15553	1.9817	1.7641	0.3376	0.072171	-0.089187	0.22892	0.15054	0.09452	0.096269	0.38992	0.3139	0.16027	1.087	-0.049878
17.02741703	0.023721	0.18453	0.012175	0.26431	0.24903	-0.029059	0.074667	0.009221	0.44096	0.48562	-0.029659	-0.02283	-0.052449	0.31959	0.042602	0.060255	-0.011881	-0.039827	-0.059658	-0.048424	1.3352	0.027556	0.16743	0.39462	0.14584	0.15899	0.25954	0.14002	1.1962	0.1637	0.27225	0.1694	0.18626	0.02414	0.129	1.9463	1.8115	0.32744	0.047393	-0.079333	0.24652	0.17091	0.010276	0.12524	0.36363	0.29255	0.16949	1.0499	0.0032614
17.0995671	0.010204	0.19846	0.028123	0.23362	0.24762	-0.0037967	0.064262	0.0067658	0.46831	0.51276	-0.012161	0.013372	-0.040299	0.30142	0.027104	0.074767	-0.016881	-0.068232	-0.06966	-0.042547	1.2508	0.063728	0.18189	0.39702	0.19608	0.20334	0.3223	0.12881	1.1653	0.17009	0.25716	0.18819	0.13851	0.012955	0.11095	1.9054	1.8084	0.32648	0.024899	-0.094117	0.26298	0.17339	-0.0090278	0.14949	0.33491	0.30597	0.12945	1.0144	0.013362
17.17171717	0.016816	0.18058	0.045783	0.23806	0.21558	0.015007	0.037205	-0.015508	0.47334	0.52433	0.011401	0.026688	-0.037897	0.23757	0.04109	0.094275	-0.0084631	-0.0815	-0.067517	-0.033697	1.1663	0.10095	0.15528	0.41958	0.2063	0.2246	0.35574	0.12785	1.1105	0.14466	0.2429	0.1861	0.11233	-0.00040704	0.090122	1.7714	1.7596	0.32541	0.038926	-0.094565	0.25206	0.15215	0.0052795	0.1495	0.31573	0.34399	0.12343	0.97708	0.017872
17.24386724	0.037968	0.16628	0.039165	0.26371	0.21079	0.037064	0.046998	-0.018175	0.46968	0.51106	0.043658	0.0042863	-0.0086768	0.20032	0.056896	0.13292	0.010913	-0.05965	-0.081655	-0.035867	1.1103	0.098732	0.13703	0.39866	0.17158	0.22797	0.36042	0.12016	1.0498	0.12086	0.22855	0.17505	0.12631	-0.0029368	0.097818	1.5892	1.8695	0.29429	0.093555	-0.063253	0.21224	0.10309	0.026814	0.13928	0.3112	0.35668	0.15605	0.94935	0.068224
17.31601732	0.015442	0.1483	0.0022432	0.26054	0.21582	0.048225	0.071522	0.0072244	0.46108	0.4884	0.05563	0.0030735	0.053586	0.21117	0.041452	0.16994	0.054304	-0.033705	-0.082992	-0.024229	1.0519	0.066945	0.14436	0.37507	0.11705	0.24689	0.36033	0.10009	0.99068	0.15498	0.21402	0.18485	0.15462	-0.0053734	0.1483	1.5198	2.1706	0.2813	0.17786	-0.024279	0.15102	0.081856	0.036841	0.14135	0.29561	0.3385	0.17132	0.9046	0.11897
17.38816739	0.0025409	0.12695	-0.019382	0.24836	0.18045	0.043602	0.06726	0.017197	0.42207	0.48633	0.047188	0.017301	0.11659	0.21502	0.016974	0.16834	0.13823	-0.015237	-0.032777	-0.0080121	0.98293	0.053631	0.16967	0.36612	0.086602	0.31556	0.37029	0.10682	0.97259	0.21374	0.20733	0.21404	0.13626	-0.0055152	0.16941	1.5184	2.4581	0.30335	0.25027	0.0039816	0.092552	0.091058	0.085175	0.11093	0.28926	0.32745	0.13917	0.88263	0.11335
17.46031746	0.031969	0.10577	0.0035441	0.23669	0.17945	0.065249	0.041895	0.014648	0.39611	0.46577	0.052533	0.022241	0.19939	0.18517	0.014714	0.1502	0.26786	-0.0038399	0.025285	-0.0023057	0.91112	0.040499	0.16544	0.4139	0.067661	0.37625	0.37211	0.12188	1.0122	0.21391	0.24852	0.24368	0.09062	0.010724	0.16151	1.4919	2.5138	0.3591	0.26436	0.033396	0.058225	0.088959	0.11864	0.042549	0.31401	0.30022	0.074833	0.91024	0.076769
17.53246753	0.050848	0.09393	0.015637	0.23277	0.18977	0.10349	0.019751	0.0079219	0.38092	0.42296	0.052508	0.020253	0.29015	0.15451	0.021109	0.14255	0.57409	-0.004454	0.065748	-0.0088019	0.92345	0.021178	0.14053	0.42045	0.039567	0.35274	0.31599	0.11203	1.075	0.18039	0.25212	0.24626	0.060853	0.017654	0.15797	1.4711	2.4703	0.38395	0.26871	0.041519	0.064963	0.043726	0.1154	-0.0042291	0.30148	0.28318	0.077801	0.92578	0.045032
17.6046176	0.045069	0.10354	0.0052687	0.2249	0.19095	0.10694	0.023473	-0.0075927	0.35595	0.41212	0.043084	-0.0012469	0.32696	0.15617	0.024537	0.12334	1.0874	-0.0021258	0.09212	-0.019256	0.94128	0.006857	0.13105	0.40448	0.016768	0.29031	0.25154	0.10455	1.1429	0.16483	0.26651	0.22941	0.054806	0.0067454	0.15676	1.5236	2.4602	0.3525	0.27554	0.031883	0.10179	0.023749	0.1097	-0.015039	0.33038	0.30301	0.12076	0.9257	0.074248
17.67676768	0.048345	0.11819	-0.0043984	0.2251	0.22432	0.051485	0.021369	-0.015619	0.33452	0.40584	0.035239	-0.034439	0.36733	0.16233	0.041688	0.096974	1.5969	0.0012095	0.088622	-0.0049992	0.89586	-0.0025783	0.1327	0.37879	0.0071198	0.26473	0.21256	0.11119	1.1933	0.15901	0.28025	0.21219	0.06026	-0.023108	0.1338	1.5946	2.434	0.33092	0.27354	0.018578	0.15718	0.026895	0.11482	0.015292	0.40372	0.30714	0.14587	0.94483	0.14912
17.74891775	0.077137	0.092314	-0.0053029	0.20488	0.25165	0.0050645	0.014733	-0.004151	0.31081	0.38252	0.035059	-0.050324	0.44565	0.143	0.064232	0.065409	1.8618	0.0066642	0.060416	-0.0020733	0.85164	0.0060691	0.10406	0.30986	0.014312	0.26361	0.18749	0.10552	1.1588	0.14265	0.26744	0.20859	0.071107	-0.055896	0.10021	1.5694	2.2869	0.31853	0.24745	-0.0013585	0.19855	0.02004	0.091759	0.041412	0.43515	0.29688	0.15475	0.9818	0.19104
17.82106782	0.085743	0.05593	-0.015182	0.14252	0.26013	0.0064244	0.033708	-4.39E-05	0.28782	0.35518	0.012416	-0.0375	0.49801	0.12713	0.066873	0.043171	1.8466	0.016845	0.015479	0.015636	0.81224	0.0065987	0.072776	0.28296	0.018358	0.24433	0.1522	0.07634	1.0863	0.15926	0.22839	0.22543	0.087968	-0.055987	0.086366	1.4793	2.1536	0.32467	0.21316	-0.0018571	0.22826	0.03479	0.056363	0.032494	0.43553	0.25571	0.17541	0.98725	0.1722
17.89321789	0.078692	0.054062	-0.019235	0.087102	0.24991	0.023535	0.059546	-0.0030666	0.2722	0.33022	-0.0048374	-0.040358	0.52926	0.13072	0.034678	0.025438	1.809	0.041448	0.0065458	0.068436	0.79043	-0.022345	0.059216	0.28065	-0.00108	0.19444	0.1082	0.054833	1.0784	0.19499	0.20014	0.24226	0.12116	-0.041483	0.093456	1.4087	2.2375	0.31932	0.19901	0.0063116	0.19702	0.060858	0.019819	0.039155	0.42388	0.21324	0.21138	0.8916	0.15192
17.96536797	0.074821	0.075727	0.001138	0.056582	0.21507	0.024451	0.088891	-0.003643	0.23032	0.31386	-0.020571	-0.031917	0.56145	0.11947	0.038154	0.010438	1.6995	0.031987	0.0216	0.12985	0.75794	-0.051666	0.032879	0.28729	-0.016906	0.1589	0.07083	0.052253	1.062	0.22123	0.15953	0.24263	0.19293	-0.013856	0.10467	1.3958	2.3898	0.2875	0.19393	0.0050096	0.1179	0.074284	0.0043333	0.071266	0.43313	0.22478	0.24376	0.81618	0.14802
18.03751804	0.062221	0.1106	0.028285	0.063507	0.2083	0.030042	0.070317	-0.021582	0.20669	0.29726	-0.032984	-0.017615	0.60543	0.10589	0.08781	-0.0052101	1.6074	-0.0097881	0.027249	0.15907	0.74583	-0.068939	-0.00053559	0.29887	-0.019274	0.15562	0.057768	0.042416	0.98796	0.22198	0.15962	0.25239	0.25955	0.028348	0.099124	1.3806	2.4511	0.27516	0.18442	0.0033106	0.067304	0.077062	0.027679	0.079108	0.45864	0.26507	0.22108	0.81611	0.16773
18.10966811	0.031658	0.13791	0.060854	0.11416	0.21981	0.040561	0.025373	-0.042071	0.20429	0.27369	-0.027723	-0.016356	0.63938	0.10678	0.10815	-0.0061505	1.6139	-0.022534	0.017466	0.163	0.74908	-0.082716	-0.01269	0.34169	-0.029254	0.16855	0.071306	0.0447	0.93642	0.22956	0.16439	0.26592	0.28051	0.056213	0.090068	1.3159	2.4809	0.30278	0.24143	-0.0064786	0.078788	0.10685	0.071982	0.098001	0.45033	0.28615	0.17835	0.85274	0.16045
18.18181818	0.024205	0.16704	0.075917	0.13851	0.22136	0.06342	0.036253	-0.036982	0.21082	0.24189	-0.017602	-0.026418	0.68303	0.096123	0.096604	0.018254	1.543	-0.039896	0.02789	0.18037	0.72612	-0.084864	-0.023834	0.36935	-0.040546	0.17038	0.072158	0.035555	0.89243	0.26677	0.15446	0.25712	0.30748	0.077826	0.094214	1.2669	2.535	0.30904	0.35961	0.0066507	0.10579	0.14846	0.0854	0.12047	0.40182	0.25336	0.20332	0.96096	0.13674
18.25396825	0.037308	0.16008	0.086664	0.13801	0.21183	0.065178	0.078588	-0.0077515	0.21807	0.23843	-0.028959	-0.037653	0.71366	0.079813	0.073272	0.026436	1.427	-0.036968	0.035053	0.19122	0.63206	-0.07021	-0.04292	0.40997	-0.068224	0.15756	0.060489	0.024717	0.86934	0.31644	0.15601	0.2465	0.33869	0.093947	0.093322	1.2494	2.5516	0.28026	0.43313	0.060482	0.16061	0.16206	0.080433	0.13289	0.35585	0.21692	0.23244	1.0391	0.15603
18.32611833	0.054824	0.14886	0.13389	0.13751	0.21372	0.025641	0.09024	0.011741	0.21767	0.24047	-0.040569	-0.052867	0.74305	0.081609	0.056621	0.018175	1.3612	-0.00832	0.03137	0.20807	0.605	-0.067275	-0.049309	0.48037	-0.086707	0.11952	0.043377	0.04165	0.89611	0.34274	0.25206	0.24766	0.35803	0.094303	0.084451	1.2176	2.4639	0.25056	0.46429	0.11071	0.19986	0.12527	0.068139	0.13544	0.32808	0.20966	0.19895	0.98259	0.16333
18.3982684	0.085231	0.20378	0.16766	0.16317	0.22306	0.03163	0.099228	0.0043267	0.21614	0.24394	-0.01334	-0.051455	0.78268	0.11268	0.069622	0.032316	1.2996	0.020329	0.035254	0.218	0.62514	-0.083522	-0.05363	0.48616	-0.071141	0.065181	0.01792	0.045154	0.95474	0.32985	0.52914	0.23476	0.36499	0.071991	0.07327	1.1369	2.373	0.23155	0.47369	0.13459	0.19263	0.083001	0.061272	0.096129	0.28614	0.25604	0.20247	0.92329	0.11591
18.47041847	0.099881	0.2611	0.16996	0.17311	0.23939	0.076018	0.10519	-0.0016499	0.18799	0.23842	0.019315	-0.042776	0.77155	0.12219	0.088363	0.05697	1.2446	0.031067	0.044323	0.20259	0.62049	-0.085825	-0.053767	0.44516	-0.053398	0.026907	-0.021783	0.021826	1.0412	0.32159	0.87861	0.21444	0.38123	0.046724	0.059654	1.0927	2.3527	0.22485	0.46203	0.13297	0.12894	0.086639	0.080526	0.048759	0.22874	0.34157	0.22152	0.97233	0.087189
18.54256854	0.062379	0.27398	0.19756	0.1375	0.22065	0.045722	0.093386	0.0060134	0.16347	0.20008	0.020982	-0.03908	0.73981	0.1176	0.070115	0.045722	1.2011	0.023954	0.058566	0.1556	0.57938	-0.057419	-0.062788	0.45586	-0.026489	0.0064914	-0.061592	0.015105	1.1041	0.32748	1.0806	0.18507	0.37151	0.04958	0.056964	1.0896	2.3019	0.21199	0.46072	0.14714	0.09464	0.11644	0.087031	0.032284	0.21803	0.37519	0.2068	1.0119	0.11516
18.61471861	0.042377	0.2277	0.23891	0.10585	0.20788	0.0048154	0.081909	0.0077444	0.17487	0.17179	0.010671	-0.042166	0.74817	0.11055	0.044618	0.028875	1.1231	0.0027676	0.08903	0.13579	0.52823	-0.0041732	-0.059402	0.47977	-0.019496	-0.014894	-0.083768	0.012942	1.1334	0.35048	1.1969	0.16061	0.34236	0.076607	0.055772	1.0741	2.2336	0.17565	0.50677	0.18875	0.11462	0.13589	0.070464	0.060457	0.23619	0.33508	0.18631	0.96387	0.13305
18.68686869	0.037489	0.17498	0.23794	0.10025	0.20066	0.0059421	0.088781	0.0023642	0.18416	0.16961	0.022028	-0.042929	0.74313	0.10408	0.017863	0.014066	1.1614	-0.016136	0.093217	0.12115	0.51439	0.020767	-0.031203	0.48753	-0.026151	-0.031772	-0.081933	0.011411	1.108	0.35211	1.3522	0.1544	0.33352	0.13259	0.079936	1.0085	2.2881	0.14394	0.58611	0.2241	0.16367	0.12968	0.067042	0.064424	0.2506	0.30406	0.18978	0.9706	0.13313
18.75901876	0.016244	0.14052	0.20316	0.09523	0.20145	0.0074055	0.093278	0.0048993	0.17864	0.17544	0.037346	-0.029348	0.73834	0.098535	-0.0087505	0.006313	1.3496	-0.038335	0.057827	0.06808	0.52168	0.024783	-0.010342	0.50528	-0.02478	-0.037567	-0.080636	0.019212	1.03	0.33469	1.6327	0.15414	0.35386	0.21562	0.10447	0.95579	2.4956	0.15107	0.58109	0.26854	0.20697	0.077358	0.076916	0.046301	0.21964	0.33659	0.17602	1.0041	0.174
18.83116883	-0.0051489	0.14949	0.14384	0.09701	0.21036	0.011523	0.082914	0.007485	0.15877	0.17484	0.01886	-0.028505	0.67298	0.080803	-0.011242	0.012343	1.5072	-0.017965	0.037468	0.027984	0.49695	0.045627	-0.0076619	0.53157	-0.022457	-0.051037	-0.088935	0.051611	0.97297	0.30782	1.909	0.15789	0.41361	0.29079	0.12204	0.96906	2.6369	0.19578	0.51225	0.33196	0.22632	0.036384	0.036211	0.072683	0.15032	0.3733	0.14116	0.96893	0.1699
18.9033189	-0.016982	0.19233	0.11768	0.13648	0.20756	0.019322	0.068926	0.014483	0.17031	0.14467	-0.0036154	-0.016078	0.5895	0.075056	-0.003613	0.026193	1.5858	0.015327	0.026453	0.019504	0.45321	0.098027	-0.00084757	0.53656	0.0022082	-0.058148	-0.092314	0.092962	0.92364	0.28161	1.9639	0.16937	0.43369	0.337	0.13245	1.0339	2.5461	0.23038	0.47941	0.35479	0.21749	0.052621	-0.0026457	0.12299	0.0882	0.37	0.10674	0.94069	0.12965
18.97546898	-0.023536	0.20821	0.13969	0.14332	0.15624	0.029626	0.066923	0.035646	0.2084	0.11092	-0.013232	-0.012305	0.54187	0.087006	-0.028205	0.035191	1.5764	0.0099589	0.013357	0.029845	0.42998	0.13985	0.011641	0.4931	0.043415	-0.04872	-0.07131	0.10693	0.8761	0.25041	1.9274	0.16356	0.42152	0.34095	0.13443	1.0531	2.4453	0.24041	0.47971	0.32387	0.20963	0.061345	-0.0082541	0.13274	0.074827	0.34926	0.086268	0.93714	0.14908
19.04761905	-0.022893	0.21516	0.17833	0.11399	0.11867	0.040659	0.076885	0.034838	0.22378	0.097985	-0.010334	-0.044805	0.51328	0.099431	-0.035772	0.040138	1.5927	0.01262	0.01159	0.039489	0.44732	0.15317	0.032212	0.42893	0.07918	-0.025397	-0.0482	0.096863	0.84145	0.21886	1.8984	0.14977	0.41031	0.3304	0.13153	1.0261	2.5286	0.25339	0.46542	0.29236	0.18341	0.04314	-0.033847	0.10518	0.086761	0.37911	0.088844	0.91607	0.15756
19.11976912	-0.023529	0.21039	0.19233	0.095	0.090632	0.051734	0.083167	0.011613	0.20048	0.11501	-0.0011309	-0.055496	0.48675	0.12867	-0.020968	0.037789	1.6902	0.0243	0.015448	0.02133	0.47024	0.17005	0.046877	0.37897	0.10238	0.0025632	-0.048131	0.086888	0.80177	0.20735	1.9319	0.15388	0.38239	0.30983	0.11504	0.97473	2.605	0.26167	0.48525	0.27632	0.13268	0.023933	-0.073669	0.085777	0.076486	0.41761	0.070832	0.88121	0.11653
19.19191919	-0.026938	0.21106	0.17326	0.089453	0.042908	0.074992	0.064477	-0.010355	0.15666	0.12223	0.009679	-0.048051	0.43928	0.1644	-0.015944	0.03879	1.9702	0.031987	-0.0067459	0.0051036	0.44354	0.19059	0.049327	0.36439	0.12038	0.035617	-0.042636	0.075197	0.75148	0.19372	1.9773	0.18959	0.33406	0.28514	0.099499	0.92501	2.6201	0.25234	0.58622	0.2458	0.11811	0.016622	-0.062666	0.078885	0.069499	0.4079	0.067352	0.86004	0.052212
19.26406926	-0.03071	0.22694	0.1435	0.099037	0.017244	0.08916	0.080857	0.00091389	0.15791	0.10268	0.013091	-0.036798	0.38951	0.20641	-0.0088466	0.016563	2.343	0.035013	-0.027602	-0.010631	0.385	0.18611	0.036013	0.35212	0.13787	0.065248	-0.035399	0.075606	0.68956	0.17815	2.0019	0.23623	0.3231	0.26045	0.0983	0.87716	2.7288	0.22206	0.74231	0.2487	0.13172	0.031485	-0.022279	0.078373	0.057892	0.3624	0.10254	0.88154	0.054307
19.33621934	-0.013787	0.23433	0.13145	0.11033	0.028933	0.08207	0.11219	0.020638	0.17636	0.083108	0.015316	0.0013151	0.35029	0.21989	0.0055599	-0.013445	2.5224	0.032637	-0.018827	-0.014623	0.31561	0.17774	0.044552	0.33001	0.143	0.076561	-0.029641	0.067139	0.67321	0.18139	1.9933	0.26757	0.35475	0.25196	0.089214	0.8279	2.8987	0.1887	0.83415	0.31441	0.12986	0.033179	0.0012213	0.068639	0.015215	0.32395	0.15155	0.95077	0.12042
19.40836941	0.01036	0.1906	0.15705	0.13023	0.071432	0.054108	0.11552	0.040572	0.1574	0.060089	0.042519	0.035351	0.34129	0.19433	-0.0070238	-0.010686	2.5013	0.033102	-0.021698	-0.0011757	0.30369	0.19012	0.06059	0.33019	0.15316	0.050875	-0.035083	0.046475	0.66259	0.15519	2.0051	0.28881	0.36595	0.26773	0.097892	0.78839	2.9941	0.1833	0.84654	0.36336	0.098816	0.0083863	0.022775	0.069088	-0.010141	0.29422	0.16447	0.96625	0.13519
19.48051948	0.033631	0.14674	0.16191	0.14077	0.096627	0.04677	0.10608	0.037855	0.11767	0.053182	0.08405	0.046778	0.31162	0.16538	-0.019234	0.025363	2.446	0.024781	-0.046754	0.0038144	0.3168	0.22556	0.061437	0.34336	0.15994	0.035957	-0.050579	0.04044	0.62264	0.1243	1.9962	0.27739	0.33982	0.27972	0.16167	0.75513	2.9385	0.1885	0.8495	0.3478	0.085121	0.0016045	0.057573	0.03782	-0.032254	0.26111	0.15372	0.96563	0.13723
19.55266955	0.03427	0.11655	0.12726	0.15373	0.082948	0.054498	0.072849	0.027768	0.089015	0.072128	0.086633	0.035145	0.25228	0.15115	-0.025602	0.040239	2.4848	0.017186	-0.06498	0.013186	0.30509	0.25687	0.060914	0.34202	0.15291	0.034417	-0.046869	0.055595	0.56406	0.095313	1.9612	0.25749	0.32056	0.29044	0.27676	0.69683	2.8183	0.1878	0.7881	0.30798	0.12379	0.056992	0.03279	-0.016362	-0.043982	0.21473	0.12493	1.0041	0.13812
19.62481962	0.031175	0.10897	0.098387	0.22106	0.062361	0.03327	0.053554	0.03116	0.078403	0.055793	0.060812	0.017814	0.22783	0.19887	0.0020207	0.021993	2.5037	0.021918	-0.068735	0.0067434	0.25508	0.25341	0.076415	0.33098	0.14039	0.011463	-0.026137	0.073138	0.52619	0.052263	1.9084	0.25229	0.39406	0.30366	0.33758	0.6066	2.7232	0.20884	0.70903	0.3068	0.19073	0.13445	-0.02228	-0.035499	-0.018725	0.20031	0.098909	1.0039	0.12924
19.6969697	0.072113	0.13507	0.10263	0.28746	0.032686	-0.011468	0.055311	0.04216	0.11422	0.039112	0.031928	0.024473	0.25681	0.26551	0.044397	0.0022668	2.4889	0.034482	-0.043501	0.0012905	0.23448	0.23188	0.066604	0.33131	0.13279	0.0061669	0.012403	0.083233	0.53285	0.043259	1.8775	0.24808	0.55987	0.31332	0.33188	0.56307	2.7412	0.2364	0.67559	0.33913	0.21348	0.1688	0.00043236	-0.045094	0.00078265	0.18472	0.11313	0.93783	0.095879
19.76911977	0.11758	0.16941	0.10716	0.28786	0.0044041	-0.025266	0.075431	0.04799	0.16255	0.038492	0.015428	0.047511	0.28171	0.28081	0.072969	-0.00070041	2.5547	0.037932	-0.0016915	0.0010967	0.26019	0.21638	0.056741	0.33234	0.1289	0.040083	0.053598	0.10115	0.52458	0.076122	1.8324	0.23512	0.73211	0.30778	0.35247	0.54838	2.6709	0.24185	0.63533	0.34292	0.19468	0.1724	0.033495	-0.047555	-0.0075101	0.16167	0.13394	0.91604	0.085716
19.84126984	0.16413	0.17502	0.087217	0.2977	-0.00054237	-0.022447	0.084299	0.043122	0.1652	0.036574	0.018289	0.053616	0.27808	0.2732	0.10335	0.013205	2.5977	0.058213	0.052159	-0.0056814	0.26311	0.18787	0.066276	0.32936	0.14261	0.10013	0.091524	0.10562	0.50816	0.09908	1.7491	0.2227	0.80543	0.27172	0.38768	0.51492	2.5619	0.21071	0.5596	0.31892	0.20803	0.16438	0.056226	-0.03655	-0.029248	0.12151	0.14096	0.89706	0.11255
19.91341991	0.20153	0.14254	0.078704	0.31436	0.0088642	-0.0056309	0.076976	0.040685	0.14277	0.02157	0.057252	0.068343	0.24606	0.28987	0.10877	0.018208	2.524	0.076498	0.070772	-0.031553	0.26074	0.14897	0.072108	0.32103	0.17544	0.15727	0.11936	0.095855	0.50334	0.1132	1.6454	0.21699	0.83091	0.24995	0.39153	0.4917	2.4854	0.21381	0.50419	0.2956	0.25832	0.17042	0.093653	0.011839	-0.043626	0.11411	0.12195	0.8697	0.15338
19.98556999	0.2022	0.10144	0.089152	0.31594	0.031943	-0.01179	0.067901	0.034244	0.093689	-0.0093661	0.089551	0.091386	0.22081	0.32824	0.090427	0.017303	2.4007	0.093588	0.057317	-0.047524	0.26618	0.13421	0.068817	0.29794	0.20998	0.1857	0.10472	0.10079	0.51874	0.14057	1.605	0.19696	0.8099	0.23764	0.36759	0.4828	2.4028	0.23788	0.4848	0.29178	0.27303	0.17796	0.10508	0.071086	-0.060893	0.14198	0.14321	0.81041	0.1511
20.05772006	0.16835	0.087399	0.096594	0.33065	0.05099	-0.0021533	0.062065	0.043889	0.050305	-0.026497	0.10546	0.11179	0.2195	0.34367	0.087622	0.021807	2.363	0.11892	0.039898	-0.039634	0.25671	0.12044	0.051874	0.25422	0.24114	0.19909	0.068045	0.11676	0.5055	0.167	1.5452	0.16906	0.76792	0.22891	0.34722	0.45057	2.2856	0.22677	0.48148	0.27698	0.29501	0.14649	0.09599	0.076212	-0.095317	0.1527	0.15255	0.75185	0.13277
20.12987013	0.16835	0.070536	0.084877	0.30239	0.041133	0.01041	0.072971	0.087295	0.035545	-0.034426	0.12641	0.14201	0.22019	0.30745	0.10412	0.030581	2.3471	0.14286	0.024538	0.011465	0.25462	0.11645	0.036037	0.21947	0.26905	0.1671	0.052891	0.12281	0.45842	0.17076	1.4981	0.17474	0.72395	0.24201	0.35792	0.38701	2.2117	0.18655	0.50078	0.25288	0.31765	0.11367	0.10634	0.054919	-0.13262	0.16521	0.12562	0.74507	0.11282
20.2020202	0.19804	0.059668	0.053531	0.26135	0.0057254	-0.0035342	0.10585	0.10657	0.029784	-0.015569	0.13747	0.16221	0.19806	0.28321	0.10315	0.049321	2.2578	0.14394	0.038866	0.080453	0.21899	0.13047	0.036813	0.20352	0.29068	0.10707	0.029995	0.14524	0.42246	0.16652	1.4504	0.171	0.68664	0.24875	0.39002	0.33108	2.2184	0.16694	0.51927	0.2172	0.31219	0.12864	0.10616	0.069046	-0.14435	0.15417	0.12691	0.71508	0.11033
20.27417027	0.21215	0.061956	0.030969	0.2571	-0.023762	-0.021231	0.1219	0.094951	0.015293	0.014453	0.127	0.13293	0.15544	0.27595	0.09099	0.071131	2.2168	0.12196	0.073242	0.075293	0.19965	0.14125	0.038055	0.19461	0.30638	0.079753	0.015389	0.15385	0.42134	0.15605	1.3512	0.15422	0.6663	0.21879	0.38986	0.31488	2.1792	0.18386	0.48248	0.18458	0.2936	0.15255	0.11778	0.065928	-0.14158	0.13094	0.14349	0.66933	0.14226
20.34632035	0.1913	0.072855	0.013413	0.25948	-0.016258	-0.015384	0.12742	0.082647	0.021827	0.017451	0.096787	0.08308	0.11595	0.24892	0.1113	0.077409	2.1487	0.091949	0.089803	0.044991	0.22806	0.14256	0.054728	0.18343	0.31803	0.096102	0.026302	0.14968	0.42888	0.13764	1.2758	0.14256	0.64742	0.19465	0.35536	0.31524	2.0465	0.18901	0.4072	0.17319	0.26318	0.15038	0.17034	0.048768	-0.13028	0.15212	0.1336	0.66959	0.17733
20.41847042	0.15227	0.057487	-0.012898	0.27878	-0.0064262	-0.00082729	0.097934	0.075008	0.044763	-0.0017917	0.047691	0.049897	0.10477	0.21382	0.15164	0.089248	2.0549	0.07049	0.087006	0.055023	0.22488	0.12645	0.051325	0.186	0.31214	0.13277	0.059941	0.16838	0.44674	0.16976	1.2249	0.13358	0.67576	0.18257	0.31584	0.28865	1.9061	0.17623	0.35208	0.15623	0.2355	0.17006	0.23031	0.045977	-0.10315	0.16585	0.11936	0.69395	0.22577
20.49062049	0.13364	0.026567	-0.011384	0.2887	0.0035053	0.00078181	0.075875	0.077517	0.044852	-0.001667	0.0079221	0.029919	0.10157	0.18085	0.19759	0.14796	1.9814	0.072163	0.073351	0.074406	0.19691	0.1135	0.025916	0.20615	0.28962	0.16366	0.10623	0.19245	0.43943	0.20527	1.1641	0.14056	0.70146	0.15399	0.29402	0.24426	1.8094	0.16682	0.33283	0.12595	0.20388	0.15611	0.25512	0.033983	-0.12908	0.15711	0.1153	0.75144	0.1936
20.56277056	0.12715	0.023438	0.018143	0.27248	0.019118	-0.019296	0.087985	0.075308	0.032502	-0.0024039	-0.011483	0.0050062	0.082161	0.16545	0.23353	0.23935	1.94	0.099251	0.068754	0.086155	0.19918	0.11018	0.021326	0.24342	0.27754	0.15903	0.13123	0.19091	0.40302	0.16949	1.1262	0.12145	0.64753	0.13772	0.27637	0.23481	1.6922	0.15419	0.32054	0.11564	0.18454	0.11515	0.26733	0.025593	-0.14505	0.14006	0.13479	0.85855	0.11385
20.63492063	0.11414	0.036604	0.078656	0.22976	0.0096881	-0.023026	0.10979	0.064478	0.026354	-0.0016155	-0.0099194	-0.017967	0.059557	0.18333	0.25121	0.31984	1.9916	0.122	0.081505	0.099211	0.20121	0.10744	0.042314	0.28849	0.27986	0.1269	0.12354	0.18445	0.3937	0.1256	1.1531	0.079555	0.59504	0.14449	0.24835	0.2696	1.5503	0.14916	0.30176	0.12075	0.19703	0.06071	0.25636	0.047814	-0.090959	0.068909	0.14371	0.96759	0.067764
20.70707071	0.08422	0.038678	0.13419	0.17898	-0.014981	0.011658	0.11361	0.068579	0.019951	-0.0019134	0.0022116	-0.015231	0.081651	0.19995	0.22762	0.37676	1.996	0.099262	0.079931	0.099647	0.16403	0.097067	0.059459	0.32367	0.30545	0.11111	0.11361	0.16103	0.40311	0.11104	1.1328	0.044551	0.58336	0.13577	0.22718	0.27886	1.459	0.12963	0.30995	0.10048	0.23503	0.044926	0.21421	0.087618	-0.0051539	0.047894	0.129	0.97489	0.099044
20.77922078	0.065181	0.028317	0.16018	0.1573	-0.0093083	0.033524	0.097675	0.068611	0.014143	-0.0033699	-0.001377	-0.0079401	0.17278	0.17268	0.19341	0.37226	1.8896	0.10039	0.059414	0.10183	0.12444	0.095112	0.095312	0.36532	0.34249	0.12308	0.11002	0.1444	0.39738	0.13302	1.0615	0.043345	0.56347	0.12203	0.22538	0.29855	1.4418	0.10129	0.33047	0.10183	0.3147	0.075721	0.19201	0.074722	0.072241	0.042121	0.10676	0.94106	0.16577
20.85137085	0.063902	0.029556	0.14975	0.14423	0.02249	0.041461	0.082841	0.081005	0.022875	0.0033708	-0.0081271	-0.019812	0.26011	0.14639	0.19042	0.34677	1.7166	0.10964	0.05503	0.099818	0.12173	0.10591	0.12871	0.44166	0.33972	0.14897	0.13042	0.12762	0.39667	0.17169	0.9936	0.043243	0.53153	0.12652	0.20616	0.36303	1.4014	0.065893	0.31134	0.079296	0.39009	0.11418	0.21556	0.060008	0.1493	0.0048568	0.06105	0.8941	0.21138
20.92352092	0.089006	0.052023	0.1544	0.12669	0.064815	0.029974	0.083754	0.16556	0.037491	0.020178	-0.010527	-0.037827	0.33045	0.14793	0.19408	0.32238	1.5886	0.07964	0.04426	0.11426	0.11616	0.12469	0.13175	0.50824	0.33568	0.18525	0.17549	0.10694	0.45751	0.20411	0.95259	0.034269	0.51516	0.13072	0.17334	0.39948	1.3264	0.038693	0.26205	0.048097	0.41333	0.084806	0.23307	0.094321	0.20045	-0.0093435	0.041667	0.85448	0.22763
20.995671	0.09576	0.058629	0.17505	0.13057	0.067837	-0.006372	0.10414	0.2938	0.023339	0.021474	-0.012096	-0.017864	0.38147	0.11799	0.18216	0.30183	1.5428	0.056626	0.027128	0.12943	0.10944	0.1346	0.11733	0.5724	0.34433	0.18536	0.19162	0.11509	0.51752	0.226	0.95026	0.032701	0.50669	0.13238	0.15152	0.39595	1.215	0.048293	0.22592	0.04504	0.38076	0.031733	0.23756	0.12689	0.22203	-0.027143	0.03254	0.89757	0.21535
21.06782107	0.081987	0.05507	0.19887	0.14443	0.041691	-0.02951	0.15354	0.40673	0.018815	0.0012285	-0.0064356	0.0064191	0.42759	0.083011	0.17021	0.27595	1.5031	0.059576	0.06374	0.11709	0.099115	0.10837	0.10365	0.69332	0.34532	0.14478	0.17596	0.11168	0.50765	0.22535	0.92231	0.041751	0.49009	0.15427	0.13003	0.37678	1.1731	0.070396	0.219	0.041713	0.34217	0.054289	0.23864	0.14189	0.25662	-0.0061778	0.046726	0.93967	0.20429
21.13997114	0.091574	0.072896	0.19414	0.14801	0.046579	-0.019076	0.1935	0.4481	0.019577	-0.018515	-0.0013113	0.010827	0.41478	0.075482	0.17698	0.26222	1.4406	0.054462	0.088887	0.11759	0.092834	0.073633	0.1015	0.84442	0.33658	0.1089	0.14846	0.10928	0.48139	0.21189	0.8668	0.061152	0.47839	0.18193	0.088828	0.40372	1.1429	0.075801	0.22081	0.038755	0.33489	0.12189	0.21737	0.1748	0.30595	0.067687	0.084949	0.96558	0.17203
21.21212121	0.0943	0.069435	0.16239	0.1512	0.03747	-0.018527	0.1921	0.4453	0.016958	-0.011747	-0.0027788	0.012467	0.39756	0.085385	0.18081	0.25299	1.3549	0.047977	0.072697	0.12686	0.097122	0.047742	0.11727	0.93503	0.32943	0.082182	0.13352	0.10218	0.47335	0.19441	0.8431	0.0615	0.44789	0.18788	0.054596	0.50372	1.0921	0.0639	0.17102	0.014434	0.36788	0.17721	0.18078	0.23684	0.35015	0.078843	0.11934	1.0067	0.12461
21.28427128	0.11949	0.031704	0.13677	0.13185	0.01785	-0.011947	0.14673	0.44343	0.017384	-0.0014728	-0.014875	0.010711	0.42881	0.14948	0.16543	0.26543	1.2829	0.065189	0.066455	0.099463	0.10743	0.061369	0.125	0.95897	0.29944	0.064825	0.13503	0.076063	0.49944	0.1752	0.82975	0.045644	0.39327	0.14918	0.057866	0.57341	1.0199	0.047868	0.1123	-0.027932	0.36401	0.17415	0.14857	0.2879	0.41962	0.03221	0.14532	0.99181	0.12442
21.35642136	0.14603	0.0074463	0.13593	0.10631	0.00089799	0.0063028	0.10325	0.41005	0.0062887	-0.0042088	0.0069059	0.032246	0.47425	0.24996	0.13596	0.30192	1.2038	0.079193	0.069822	0.048861	0.12078	0.10951	0.10626	0.95163	0.24455	0.061847	0.1559	0.072729	0.51378	0.17363	0.85074	0.050403	0.39326	0.12897	0.063745	0.58703	0.98601	0.026842	0.11619	-0.056415	0.38825	0.14753	0.15857	0.30602	0.50802	-0.0049484	0.1296	0.93887	0.15129
21.42857143	0.1498	0.015797	0.13252	0.11154	-0.020438	0.014671	0.086535	0.34918	-0.0019644	-0.012528	0.016413	0.034798	0.48326	0.29605	0.12562	0.32961	1.1251	0.093136	0.08139	0.014203	0.12793	0.16251	0.11332	0.93208	0.21142	0.096298	0.17439	0.10187	0.46753	0.18364	0.88614	0.071269	0.4904	0.1222	0.049063	0.5817	0.99153	0.0096164	0.14223	-0.047361	0.48914	0.11927	0.24393	0.29247	0.54363	-0.02272	0.12011	0.87704	0.15872
21.5007215	0.14329	0.049054	0.14738	0.14258	-0.044323	0.025231	0.080764	0.30958	0.022525	-0.018383	0.0066589	0.014605	0.42723	0.30705	0.15318	0.32746	1.0837	0.10814	0.079462	0.016185	0.11117	0.2004	0.15809	0.96052	0.2228	0.12781	0.17763	0.12163	0.40812	0.20947	0.86535	0.099086	0.62258	0.10322	0.026216	0.56603	0.9847	-0.0024823	0.14045	-0.025171	0.55325	0.065079	0.39238	0.25174	0.52766	-0.072902	0.16459	0.81538	0.1372
21.57287157	0.12288	0.074707	0.15707	0.16558	-0.071228	0.020687	0.060696	0.2915	0.031843	-0.0077427	-0.0047121	-0.0063086	0.37628	0.30041	0.16853	0.28656	1.0773	0.11034	0.049544	0.023987	0.082484	0.22461	0.19491	1.0091	0.25317	0.10779	0.17825	0.12114	0.37246	0.19968	0.83149	0.11156	0.64214	0.099899	0.016734	0.53666	0.94176	-0.0036823	0.13907	-0.023806	0.55149	0.057884	0.53193	0.23564	0.4852	-0.11843	0.19296	0.79108	0.128
21.64502165	0.13271	0.080257	0.14583	0.16615	-0.086255	-0.0054652	0.044632	0.26893	0.014972	0.020754	-0.023122	-0.033553	0.34743	0.25749	0.1499	0.23558	1.0528	0.092502	0.061377	0.017265	0.082158	0.20212	0.15284	1.0719	0.24865	0.079947	0.1603	0.12046	0.34859	0.17413	0.81088	0.11902	0.59291	0.10763	0.0038351	0.5691	0.87435	0.003061	0.16563	-0.050374	0.51619	0.096232	0.62992	0.2568	0.45026	-0.11949	0.17985	0.78355	0.15681
21.71717172	0.18388	0.084636	0.15602	0.15716	-0.084713	-0.033629	0.024275	0.26246	-0.0092817	0.032964	-0.044463	-0.06275	0.31508	0.21825	0.13194	0.20309	1.0414	0.089874	0.09839	0.029474	0.082771	0.12953	0.074209	1.0611	0.22946	0.063752	0.12282	0.12375	0.31345	0.18581	0.74922	0.12472	0.58199	0.093674	-0.0068642	0.71486	0.83949	-0.024114	0.20215	-0.062852	0.48246	0.097467	0.64018	0.26104	0.47688	-0.104	0.15624	0.82002	0.13447
21.78932179	0.2238	0.075678	0.17742	0.13525	-0.044609	-0.037565	0.034583	0.25711	-0.023913	0.018024	-0.050099	-0.035855	0.28632	0.1839	0.13232	0.17832	0.9846	0.1189	0.117	0.05453	0.087231	0.066495	0.024346	1.0147	0.23802	0.044817	0.076585	0.12383	0.28632	0.2205	0.71793	0.13343	0.58257	0.071417	-0.01206	0.927	0.84206	-0.040711	0.22333	-0.050448	0.43622	0.064077	0.57862	0.2619	0.48795	-0.10728	0.17221	0.84482	0.0915
21.86147186	0.24946	0.068495	0.17329	0.1159	-0.030307	-0.054194	0.078671	0.23092	-0.01482	0.0018486	-0.045912	-0.0018353	0.25653	0.16987	0.14964	0.16632	0.86814	0.15004	0.14067	0.058875	0.09942	0.042505	-0.0012895	0.98504	0.24831	0.02418	0.029416	0.10695	0.28959	0.23771	0.70084	0.15117	0.52213	0.056873	-0.0071166	1.11	0.84554	-0.027536	0.22637	-0.064256	0.40617	0.044791	0.54447	0.27267	0.45171	-0.12347	0.17136	0.81802	0.1012
21.93362193	0.25761	0.045488	0.14397	0.15776	-0.041653	-0.075562	0.11704	0.1988	0.013401	-0.011801	-0.031354	-0.01591	0.23251	0.1669	0.15683	0.16429	0.80102	0.15601	0.16973	0.081861	0.092827	0.048084	0.012746	0.96051	0.23762	0.013466	0.008197	0.10548	0.29835	0.23651	0.66544	0.14364	0.47846	0.045845	-0.0085698	1.2955	0.823	-0.0021401	0.21287	-0.087515	0.44455	0.043161	0.62626	0.25707	0.43426	-0.086871	0.13773	0.78018	0.062135
22.00577201	0.21798	0.042551	0.10408	0.17377	-0.0086758	-0.070887	0.13218	0.17806	0.010281	-0.007108	-0.025924	-0.028295	0.2204	0.15703	0.13904	0.1787	0.86059	0.1289	0.1602	0.12454	0.096236	0.066027	0.035556	0.96694	0.19716	-0.0013823	-0.0084928	0.11111	0.29825	0.24243	0.60417	0.12829	0.43929	0.030798	-0.028714	1.5025	0.78264	0.0087368	0.18968	-0.074419	0.49172	0.035625	0.66813	0.26336	0.39977	-0.017257	0.14257	0.77119	0.037835
22.07792208	0.18159	0.047066	0.080063	0.1221	0.043006	-0.042998	0.12624	0.16893	-0.0002584	0.015315	-0.039436	0.0066418	0.21278	0.15083	0.11676	0.17563	1.0564	0.10495	0.10924	0.13971	0.23046	0.077885	0.041503	0.98484	0.15956	-0.034997	-0.024914	0.094539	0.28085	0.22054	0.54358	0.13169	0.37379	0.045384	-0.043149	1.7187	0.70268	0.0089977	0.16369	-0.048121	0.48347	0.026785	0.55017	0.30052	0.36704	0.043376	0.12679	0.76077	0.078319
22.15007215	0.18187	0.025399	0.081068	0.076965	0.046473	-0.044632	0.11425	0.15468	0.0046024	0.016695	-0.064334	0.046064	0.22553	0.14064	0.098662	0.13977	1.2719	0.10409	0.10392	0.13013	0.49478	0.073002	0.038526	0.98769	0.13848	-0.051059	-0.0051352	0.065714	0.26863	0.17532	0.52747	0.12711	0.32108	0.057173	-0.048859	1.8302	0.63522	0.013289	0.13737	-0.069363	0.45946	0.033401	0.502	0.28554	0.38499	0.10757	0.099924	0.74401	0.055278
22.22222222	0.20821	0.021917	0.083173	0.060825	0.053486	-0.060161	0.12147	0.13127	0.0021452	0.031004	-0.059104	0.038854	0.25606	0.13843	0.081197	0.10683	1.3174	0.12105	0.13841	0.14349	0.70123	0.06449	0.033793	1.0315	0.13395	-0.030971	0.038576	0.045725	0.26419	0.14151	0.53002	0.11842	0.29755	0.010209	-0.066231	1.814	0.62432	0.021176	0.10058	-0.10154	0.43461	0.030951	0.5641	0.24992	0.41356	0.19982	0.070464	0.74129	0.01939
22.29437229	0.23054	0.039351	0.06105	0.066234	0.076614	-0.070877	0.15464	0.1207	0.005637	0.031044	-0.021011	0.020754	0.29297	0.13951	0.067176	0.09995	1.2838	0.13053	0.15579	0.17644	0.79471	0.071886	0.020391	1.0691	0.14695	-0.01201	0.045681	0.024078	0.2503	0.13595	0.50409	0.11021	0.28468	-0.03128	-0.070016	1.828	0.63258	0.029487	0.079019	-0.10778	0.35798	0.03221	0.55367	0.21048	0.39857	0.26835	0.024448	0.7384	0.036679
22.36652237	0.22654	0.054801	0.043503	0.083453	0.077899	-0.049336	0.1805	0.11046	0.018615	0.027274	0.0050703	0.0205	0.30401	0.12047	0.065031	0.12033	1.2742	0.12975	0.16916	0.20736	0.81384	0.10355	0.0026794	1.0717	0.16552	-0.011684	0.02078	0.010466	0.22852	0.14627	0.49409	0.11085	0.30363	-0.039138	-0.061372	1.9361	0.61464	0.041825	0.063544	-0.10032	0.30242	0.05103	0.48864	0.15421	0.34592	0.28404	0.013655	0.76036	0.016514
22.43867244	0.2004	0.05408	0.033509	0.095628	0.094358	-0.025905	0.16123	0.10442	0.026991	0.02262	0.015019	0.018437	0.29439	0.086629	0.077656	0.14825	1.2961	0.13485	0.176	0.22192	0.819	0.1633	0.012383	1.0457	0.15802	-0.018475	0.0026446	0.010831	0.18909	0.14625	0.47314	0.12697	0.31557	-0.014904	-0.063284	2.014	0.58874	0.059857	0.075134	-0.085255	0.33572	0.052224	0.4629	0.10637	0.32536	0.29141	0.066582	0.72057	-0.0051005
22.51082251	0.21516	0.023183	0.028743	0.11132	0.11552	-0.013745	0.12309	0.09562	0.034702	0.024859	0.0082223	0.031026	0.27431	0.050928	0.079215	0.13777	1.2893	0.13966	0.19366	0.21098	0.80862	0.19289	0.026788	1.019	0.14317	-0.025124	-0.015964	0.008362	0.16445	0.13744	0.4308	0.1444	0.3266	-0.00010745	-0.059554	1.964	0.59854	0.078	0.080711	-0.061772	0.3599	0.040978	0.45749	0.054052	0.35892	0.29466	0.12286	0.63493	0.0090665
22.58297258	0.28057	0.017676	0.0058619	0.10084	0.10447	-0.027361	0.096777	0.091492	0.033696	0.050184	-0.010726	0.04578	0.26078	0.066936	0.068429	0.11152	1.2063	0.11145	0.19193	0.18381	0.76608	0.17192	0.016023	0.98639	0.13003	-0.031784	-0.019372	-0.0090617	0.17826	0.12625	0.4083	0.13904	0.34572	-0.018019	-0.055164	1.8927	0.62718	0.064016	0.067499	-0.050279	0.32519	0.030309	0.46776	0.038494	0.36881	0.26285	0.16897	0.60683	-0.03836
22.65512266	0.36843	0.027333	-0.0022526	0.085615	0.1022	-0.043108	0.11603	0.094211	0.041292	0.065672	-0.014107	0.057988	0.25518	0.1003	0.065982	0.094374	1.15	0.076777	0.15889	0.15004	0.71041	0.14281	-0.0065042	0.92279	0.10999	-0.019416	-0.0053305	-0.030672	0.19576	0.13025	0.38931	0.13195	0.37917	-0.022904	-0.073102	1.8402	0.62932	0.022313	0.070152	-0.066773	0.30593	0.029607	0.45153	0.077919	0.36601	0.22085	0.20518	0.61847	-0.06709
22.72727273	0.43017	0.013364	0.012116	0.055579	0.078882	-0.031911	0.1415	0.083537	0.050225	0.067853	-0.0024227	0.065473	0.24147	0.088761	0.076445	0.082433	1.108	0.081784	0.16739	0.14153	0.68278	0.13126	-0.0048393	0.84578	0.091488	0.032134	0.018718	-0.01967	0.16409	0.12562	0.35917	0.15512	0.43409	-0.016345	-0.09081	1.7907	0.5979	-0.0072387	0.079636	-0.072389	0.29961	0.028108	0.47972	0.0888	0.41433	0.20678	0.17929	0.62153	-0.063318
22.7994228	0.43322	0.013001	-0.0014493	0.037501	0.029447	-0.027487	0.1448	0.058441	0.051998	0.080647	0.0072251	0.044306	0.21633	0.057515	0.078364	0.074841	1.0449	0.092733	0.19165	0.14458	0.78908	0.1453	0.024714	0.80789	0.09836	0.080136	0.054198	0.016648	0.12497	0.10794	0.34762	0.17998	0.47718	-0.013128	-0.091344	1.7574	0.58243	0.010236	0.096069	-0.049306	0.25833	0.051635	0.56726	0.067169	0.4873	0.22383	0.14398	0.6234	-0.064813
22.87157287	0.41654	0.030866	-0.019553	0.060172	0.0097372	-0.035653	0.18635	0.063719	0.035063	0.080251	-0.0019977	0.033182	0.22126	0.039251	0.0604	0.083985	0.9584	0.098361	0.20042	0.091787	0.99559	0.15222	0.04176	0.76161	0.11008	0.10285	0.082216	0.054738	0.10798	0.10157	0.35674	0.17548	0.46085	-0.013617	-0.10175	1.7284	0.58521	0.042163	0.10911	-0.034146	0.20112	0.059417	0.6377	0.069326	0.51629	0.24115	0.15151	0.62226	-0.090919
22.94372294	0.42147	0.033927	-0.017465	0.068748	0.0037035	-0.019427	0.22323	0.081354	0.011452	0.051651	-0.020343	0.045097	0.24549	0.040232	0.063184	0.084788	0.89145	0.089031	0.2071	0.06702	1.1067	0.15498	0.041908	0.6656	0.10722	0.11845	0.083402	0.062884	0.10931	0.099071	0.37877	0.15061	0.43149	-0.027906	-0.11577	1.6807	0.57725	0.024102	0.11601	-0.041866	0.18408	0.067508	0.66503	0.0785	0.55493	0.28844	0.14232	0.62299	-0.10763
23.01587302	0.43097	0.019726	0.0075679	0.061623	0.021353	-0.0044305	0.20986	0.07898	-0.0035971	0.025327	-0.045286	0.030993	0.22734	0.026827	0.071301	0.059378	0.87987	0.10418	0.16965	0.07336	1.1001	0.15811	0.0089324	0.56826	0.11246	0.13747	0.0887	0.066868	0.099124	0.072927	0.3814	0.12275	0.4225	-0.030816	-0.09869	1.588	0.61165	0.0025576	0.13655	-0.054656	0.20069	0.13066	0.62528	0.070337	0.5992	0.30019	0.15846	0.62391	-0.079963
23.08802309	0.42787	-0.00030149	0.02514	0.059555	0.030186	-0.035838	0.16583	0.079434	-0.015835	0.026858	-0.058948	-0.0073928	0.20167	0.0084764	0.075513	0.05224	0.90467	0.10783	0.11923	0.050859	1.1132	0.18252	0.0009077	0.50568	0.14362	0.15816	0.10413	0.072507	0.067915	0.047944	0.37541	0.097381	0.3795	-0.0004751	-0.072953	1.4839	0.70643	-0.0025696	0.13089	-0.068633	0.227	0.20548	0.6175	0.05041	0.59519	0.28534	0.16426	0.62781	-0.043023
23.16017316	0.39371	-0.00038958	0.016325	0.063833	0.01711	-0.06607	0.15886	0.087778	-0.020022	0.02279	-0.052145	-0.038507	0.19961	0.020753	0.064309	0.096141	0.90573	0.048985	0.10412	0.02977	1.1281	0.21572	0.014153	0.50607	0.16511	0.16765	0.11896	0.099606	0.066163	0.032897	0.40341	0.070964	0.32981	0.035158	-0.067197	1.4352	0.77911	-0.019205	0.086468	-0.086969	0.23611	0.28726	0.64513	0.058168	0.59364	0.25803	0.154	0.5817	-0.054061
23.23232323	0.33378	-0.0022932	-0.004887	0.056874	0.0043775	-0.055577	0.23713	0.091282	-0.011686	0.010539	-0.041578	-0.031519	0.19301	0.038152	0.037326	0.13855	0.86018	0.032627	0.098493	0.029497	1.1269	0.28654	0.027196	0.46235	0.16817	0.16708	0.12931	0.13651	0.073257	0.025537	0.42427	0.048911	0.32474	0.059294	-0.075959	1.3576	0.79257	-0.063225	0.050332	-0.096725	0.21193	0.36271	0.65906	0.097602	0.62316	0.25317	0.16487	0.5334	-0.067987
23.3044733	0.31521	0.014743	-0.033705	0.041137	0.0106	-0.04502	0.40241	0.10015	-0.010811	-0.0033282	-0.039837	-0.020892	0.19104	0.046898	0.018038	0.14092	0.81519	0.060549	0.089136	0.026605	1.1233	0.31919	0.026645	0.38691	0.18147	0.16152	0.13072	0.17277	0.065205	0.031113	0.43858	0.06179	0.28288	0.064577	-0.086821	1.2564	0.77734	-0.084777	0.018756	-0.09156	0.20106	0.40761	0.64981	0.16938	0.65927	0.28087	0.15351	0.52518	-0.0681
23.37662338	0.33258	0.024392	-0.038803	0.041821	0.020186	-0.044502	0.57938	0.10926	-0.015444	-0.00245	-0.035505	-0.019928	0.18794	0.026955	0.028257	0.11415	0.80499	0.068112	0.12452	0.029078	1.1089	0.32168	0.018278	0.32268	0.18458	0.17288	0.11767	0.22788	0.070532	0.041523	0.40999	0.099376	0.22353	0.055697	-0.082643	1.1828	0.78527	-0.06961	0.021724	-0.087877	0.17296	0.49543	0.69505	0.17642	0.7442	0.3282	0.15939	0.50773	-0.073779
23.44877345	0.32113	0.024011	-0.034855	0.045395	-0.00033007	-0.042221	0.64518	0.091626	-0.014082	0.0036389	-0.022432	0.010732	0.20232	0.0063788	0.046452	0.08933	0.81995	0.0685	0.16413	0.053291	1.0789	0.33692	0.025974	0.27615	0.18669	0.22954	0.12455	0.29254	0.090332	0.036316	0.36446	0.11602	0.18408	0.043163	-0.065997	1.1423	0.7865	-0.041682	0.036679	-0.084903	0.12972	0.55513	0.71033	0.13229	0.85016	0.32464	0.21086	0.44914	-0.050831
23.52092352	0.29059	0.0295	-0.015988	0.056722	0.017181	-0.043487	0.64154	0.058664	-0.021426	0.029923	0.0073671	0.01989	0.20489	0.016607	0.041086	0.067112	0.83733	0.092698	0.19498	0.063657	0.99315	0.32675	0.036472	0.24907	0.18078	0.29034	0.15753	0.33408	0.088594	0.018958	0.33156	0.10489	0.17774	0.03723	-0.076679	1.097	0.71837	-0.018931	0.023388	-0.079237	0.12242	0.49095	0.60229	0.11487	0.87751	0.27317	0.2272	0.41553	-0.030392
23.59307359	0.2475	0.034439	-0.0026199	0.046556	0.064455	-0.063747	0.64768	0.050285	-0.036546	0.12364	0.032374	0.023286	0.21475	0.044936	0.045444	0.066801	0.78416	0.11139	0.23341	0.047114	0.91342	0.32016	0.064821	0.23331	0.17438	0.28565	0.17543	0.35661	0.070287	-0.0061904	0.30678	0.10134	0.15903	0.055063	-0.091149	1.0217	0.6354	0.014223	0.00062768	-0.084475	0.16037	0.43397	0.54818	0.1339	0.90215	0.24917	0.21434	0.40364	-0.064068
23.66522367	0.21043	0.034138	0.010011	0.040768	0.080897	-0.070302	0.63494	0.050603	-0.053979	0.26107	0.031954	0.043444	0.2199	0.070369	0.065305	0.093657	0.70275	0.11082	0.26253	0.021747	0.90417	0.31827	0.085688	0.24153	0.1915	0.23833	0.14186	0.42368	0.058108	-0.014211	0.29347	0.10423	0.11777	0.061759	-0.079521	0.95754	0.61269	0.064385	0.0019471	-0.084484	0.21202	0.47642	0.57702	0.13768	0.90097	0.26007	0.2272	0.37898	-0.060746
23.73737374	0.19409	0.052414	0.0017244	0.043351	0.075033	-0.032347	0.60152	0.045214	-0.047796	0.39729	0.0056201	0.049065	0.20893	0.088387	0.068465	0.11974	0.64896	0.11642	0.28876	-0.011754	0.92042	0.29987	0.091208	0.3091	0.19181	0.20912	0.084313	0.57223	0.089658	-0.01598	0.25567	0.10297	0.090586	0.058756	-0.050802	0.92702	0.59482	0.13084	0.014723	-0.10266	0.23794	0.5401	0.56083	0.11528	0.85255	0.22948	0.25736	0.40734	-0.053002
23.80952381	0.20025	0.066082	-0.0030168	0.057566	0.070308	0.011369	0.57467	0.037331	-0.039841	0.49717	-0.0041602	0.030892	0.18809	0.097923	0.058843	0.11759	0.59299	0.11716	0.3079	-0.049845	0.88389	0.27679	0.099778	0.32455	0.17196	0.17293	0.064674	0.75631	0.17353	-0.019254	0.21885	0.1159	0.088901	0.045512	-0.02175	0.89881	0.52786	0.19431	0.016769	-0.127	0.23781	0.49582	0.57576	0.10929	0.82005	0.2171	0.30994	0.44746	-0.026673
23.88167388	0.19115	0.069182	-0.017249	0.056579	0.066973	-0.0012693	0.56996	0.042068	-0.043655	0.55607	0.013005	0.014388	0.16227	0.10031	0.040495	0.084638	0.58132	0.097476	0.27422	-0.063793	0.82662	0.26611	0.1246	0.27716	0.16499	0.12646	0.067769	0.90978	0.25292	-0.018908	0.21659	0.11798	0.082235	0.052504	0.016195	0.91977	0.49628	0.2327	0.021643	-0.12517	0.23456	0.42703	0.60834	0.095892	0.87776	0.2369	0.35058	0.44575	-0.0070027
23.95382395	0.18626	0.072534	-0.045992	0.056519	0.041293	-0.052978	0.5467	0.052572	-0.067114	0.56133	0.028033	0.0096297	0.15112	0.105	0.039032	0.056477	0.63192	0.078191	0.22496	-0.051797	0.75492	0.25567	0.14632	0.24959	0.17351	0.11234	0.057415	1.0072	0.2846	-0.029898	0.20347	0.10201	0.04788	0.068264	0.036875	1.0135	0.48483	0.21643	0.027113	-0.10317	0.2103	0.41072	0.62367	0.035495	0.94499	0.27298	0.31656	0.42285	-0.040257
24.02597403	0.22573	0.043258	-0.065714	0.0687	-0.0048068	-0.066588	0.48538	0.054129	-0.079329	0.5248	0.026304	0.010149	0.16594	0.11176	0.021389	0.031216	0.6971	0.080268	0.19625	-0.055463	0.6679	0.23353	0.13459	0.24859	0.19386	0.11806	0.059344	1.068	0.30689	-0.044223	0.19481	0.11293	0.02139	0.081783	0.03101	1.0802	0.45878	0.19351	0.0084181	-0.093526	0.21628	0.40549	0.65924	0.013207	0.9289	0.30818	0.29782	0.4039	-0.071614
24.0981241	0.28381	0.0071378	-0.055335	0.061348	-0.018166	-0.068505	0.42029	0.028101	-0.078409	0.47588	0.028677	0.027438	0.16234	0.10258	-0.0064139	0.0034062	0.71632	0.089905	0.20149	-0.080439	0.65024	0.19842	0.11201	0.23737	0.22188	0.12823	0.099331	1.0876	0.34399	-0.051693	0.20076	0.13804	0.0080212	0.098063	0.024367	1.0826	0.42362	0.2049	-0.0017975	-0.10292	0.2199	0.35699	0.70144	0.038606	0.87482	0.3717	0.31376	0.42992	-0.045024
24.17027417	0.31072	0.002643	-0.034263	0.046538	0.0014643	-0.076562	0.40871	0.013924	-0.060879	0.48579	0.042851	0.046272	0.16229	0.094215	-0.018528	-0.017102	0.70808	0.10308	0.24495	-0.096774	0.63272	0.18692	0.095658	0.22895	0.2371	0.12604	0.1303	1.0283	0.36687	-0.038859	0.21191	0.11969	-0.0034658	0.094662	0.022226	1.0406	0.39316	0.19594	0.0032253	-0.10373	0.20329	0.31344	0.69765	0.072064	0.89459	0.48738	0.30582	0.43606	-0.0041823
24.24242424	0.29791	0.0038777	-0.037051	0.056152	0.015666	-0.072604	0.42115	0.030098	-0.03655	0.53612	0.026102	0.045022	0.17973	0.085917	-0.031594	-0.03357	0.71362	0.1024	0.29775	-0.089692	0.71594	0.18801	0.075299	0.24682	0.23851	0.098939	0.12044	0.98049	0.37387	-0.013783	0.21696	0.097724	-0.0049939	0.07676	0.0070038	0.96512	0.38339	0.17624	-0.01237	-0.076143	0.22537	0.32707	0.65465	0.072381	0.94978	0.58594	0.27621	0.3936	0.029748
24.31457431	0.29981	0.0025263	-0.067163	0.072242	0.00051068	-0.072171	0.41189	0.044666	-0.016592	0.54892	0.0040017	0.04515	0.18486	0.060253	-0.036209	-0.038705	0.7934	0.079152	0.27366	-0.069797	0.70753	0.14313	0.035463	0.27233	0.25267	0.084919	0.083116	1.0674	0.3758	0.027585	0.20987	0.11091	-0.0050958	0.048614	-0.010843	0.92186	0.37584	0.13584	0.0069039	-0.027599	0.29996	0.34489	0.61171	0.088558	0.92636	0.5998	0.2328	0.36297	-0.0061354
24.38672439	0.30139	0.026384	-0.095137	0.065744	-0.013678	-0.065634	0.38982	0.051654	0.01075	0.57127	-0.0025086	0.048444	0.18596	0.057073	-0.045179	-0.030253	0.97139	0.055716	0.18359	-0.033532	0.72993	0.097388	-0.0015826	0.2397	0.26805	0.084823	0.050681	1.189	0.34685	0.036713	0.19624	0.10181	-0.0061895	0.021403	0.025708	0.91278	0.37093	0.098534	0.062506	0.028465	0.36802	0.33808	0.62054	0.13754	0.85113	0.60122	0.18476	0.37401	-0.057459
24.45887446	0.27072	0.061307	-0.098116	0.037162	-0.021181	-0.0613	0.35421	0.064936	0.036512	0.57643	-0.0013948	0.05003	0.18297	0.05529	-0.052688	-0.028204	1.1025	0.049513	0.11688	-0.046492	0.78453	0.085187	-0.010246	0.19033	0.25108	0.073471	0.033015	1.1905	0.28245	0.0090746	0.16623	0.082889	0.01836	0.01748	0.10916	0.87835	0.367	0.081187	0.10014	0.053765	0.37109	0.30709	0.69434	0.12174	0.83777	0.58859	0.1403	0.3606	-0.016813
24.53102453	0.22163	0.085015	-0.082768	0.0021512	-0.033325	-0.055666	0.36507	0.063122	0.051742	0.55742	0.030321	0.06329	0.18853	0.062101	-0.03711	-0.0059993	1.1067	0.055565	0.12707	-0.080232	0.77474	0.090556	-0.015066	0.18922	0.23966	0.037383	0.016161	1.1819	0.23495	-0.0053329	0.14216	0.085646	0.013766	0.015282	0.18306	0.80211	0.35719	0.066291	0.10325	0.051881	0.3448	0.28375	0.71797	0.081202	0.84718	0.55728	0.14238	0.34087	0.026296
24.6031746	0.19481	0.094126	-0.084	-0.018278	-0.025578	-0.028073	0.46922	0.065404	0.046011	0.51696	0.047296	0.090248	0.19202	0.076302	-0.0066552	0.0064042	1.0604	0.063282	0.14408	-0.072769	0.7737	0.092886	-0.026377	0.21111	0.26147	0.013318	-0.0050054	1.2221	0.21759	-0.0060724	0.14178	0.087439	-0.030425	0.01006	0.22676	0.718	0.33361	0.068027	0.11834	0.038035	0.32316	0.31323	0.76759	0.066016	0.83551	0.56232	0.18462	0.27283	0.012185
24.67532468	0.21332	0.089475	-0.098642	0.038117	-0.0045342	-0.0031467	0.60494	0.090827	0.061385	0.50071	0.018827	0.089202	0.18411	0.082468	-0.0025822	-0.017007	0.98999	0.042491	0.085609	-0.045007	0.76795	0.088584	-0.028607	0.20799	0.27323	0.0060267	-0.032285	1.2129	0.2014	0.012711	0.14506	0.09124	-0.030172	0.0071093	0.25887	0.69609	0.30926	0.060645	0.15281	0.0075002	0.31709	0.34514	0.84655	0.069122	0.8422	0.58103	0.23942	0.24758	0.014939
24.74747475	0.20918	0.07181	-0.1005	0.094971	0.0046975	-0.0078056	0.67042	0.13405	0.08148	0.47143	0.005417	0.077819	0.17902	0.090858	-0.013514	-0.02381	0.922	0.01876	0.035747	-0.032959	0.75292	0.084896	-0.023712	0.17492	0.23713	-0.015216	-0.050776	1.1415	0.18887	0.04454	0.15018	0.075795	-0.026073	0.024045	0.28233	0.69675	0.28817	0.039201	0.19924	-0.0051862	0.32902	0.34725	0.84193	0.068243	0.93511	0.5415	0.26395	0.23962	0.040513
24.81962482	0.19627	0.064245	-0.10578	0.077465	0.0078446	-0.0092206	0.66291	0.23045	0.069617	0.45071	0.012913	0.08504	0.17023	0.095026	-0.015851	0.0035586	0.89501	-0.00063835	0.026471	-0.051527	0.70549	0.065859	-0.021045	0.15849	0.18113	-0.042577	-0.055096	1.043	0.17617	0.061967	0.16102	0.062429	-0.061396	0.02551	0.27852	0.66749	0.26817	0.05155	0.30067	0.021807	0.32995	0.3336	0.7675	0.047227	1.0103	0.50606	0.23945	0.19732	0.0036735
24.89177489	0.19353	0.070537	-0.1031	0.038509	0.010205	0.0075268	0.6684	0.35382	0.035753	0.41037	0.024322	0.060116	0.16944	0.087106	-0.012672	0.019652	0.88298	-0.0030226	0.050678	-0.0822	0.70023	0.052216	-0.0052426	0.13941	0.1333	-0.027029	-0.045511	0.96738	0.18332	0.050862	0.18426	0.090272	-0.091958	0.012725	0.25495	0.62449	0.2546	0.077508	0.43663	0.032274	0.29207	0.34001	0.7569	0.043721	1.0195	0.48111	0.18116	0.18554	-0.051321
24.96392496	0.17363	0.053	-0.10673	0.02761	0.01621	0.021933	0.65792	0.40257	0.033008	0.39309	0.026999	0.038003	0.17168	0.063134	-0.019532	0.024314	0.87172	0.0011494	0.075162	-0.093961	0.70064	0.040795	0.019818	0.097704	0.12886	-0.0027436	-0.037393	0.94138	0.21564	0.029006	0.27037	0.10327	-0.10745	-0.012262	0.22474	0.58606	0.24454	0.081466	0.53866	0.039311	0.28906	0.3403	0.83477	0.031285	1.0814	0.5087	0.14435	0.17892	-0.022083
25.03607504	0.138	0.033235	-0.099143	0.053623	0.029291	0.030168	0.61798	0.40418	0.054266	0.39887	0.013006	0.065481	0.14457	0.039049	-0.028815	0.017112	0.81653	-0.018248	0.059001	-0.084929	0.67018	0.0261	0.025572	0.070632	0.1467	-0.012042	-0.036695	0.94772	0.24793	0.01304	0.39266	0.079048	-0.11385	-0.037224	0.2117	0.538	0.21925	0.054125	0.56453	0.054131	0.2998	0.35838	0.86149	-0.0039166	1.141	0.5649	0.18883	0.1506	0.00028562
25.10822511	0.10666	0.016506	-0.074376	0.092067	0.026624	0.042507	0.58799	0.39989	0.069917	0.36887	-0.0061609	0.062909	0.11174	0.023303	-0.030806	-0.0098157	0.72513	-0.03432	0.038598	-0.067611	0.66331	0.032722	0.035639	0.072199	0.16407	-0.023177	-0.030937	0.93444	0.25432	-0.006383	0.4633	0.059464	-0.10804	-0.044761	0.22674	0.47085	0.21483	0.012392	0.5276	0.063053	0.29246	0.36767	0.87862	-0.04174	1.1613	0.55865	0.26157	0.13291	-0.017094
25.18037518	0.11166	-0.009073	-0.064531	0.12999	0.02984	0.068726	0.56448	0.4074	0.091497	0.34737	-0.01686	0.0091278	0.10952	0.014663	-0.013128	-0.044939	0.62519	-0.036545	0.049378	-0.051839	0.65755	0.039865	0.058654	0.056188	0.15053	-0.0070613	-0.034009	0.88421	0.23451	-0.01066	0.47887	0.050185	-0.087851	-0.027372	0.24649	0.41872	0.2329	-0.018609	0.50002	0.062071	0.30546	0.34045	0.94905	-0.046266	1.1966	0.54486	0.3148	0.13059	-0.033602
25.25252525	0.13332	-0.014309	-0.039257	0.12445	0.022836	0.073019	0.53203	0.40701	0.10651	0.35966	-0.025905	-0.016833	0.12768	0.017068	-0.0072	-0.090452	0.58298	-0.042682	0.040784	-0.024767	0.61271	0.046938	0.058262	0.029973	0.10577	0.018577	-0.025858	0.74771	0.2214	-0.00071538	0.43251	0.059872	-0.046539	-0.015547	0.24433	0.40987	0.25096	-0.014696	0.48636	0.044291	0.28993	0.33752	1.0214	-0.033227	1.2237	0.57048	0.37906	0.16864	-0.080001
25.32467532	0.156	0.0091264	-0.006475	0.066234	0.010127	0.051522	0.50481	0.37264	0.097388	0.35574	-0.015532	0.0030385	0.12505	0.034288	-0.032707	-0.1047	0.65652	-0.024363	0.012311	-0.0082208	0.51618	0.056429	0.033822	0.017257	0.068838	0.022986	-0.0078295	0.60781	0.21009	0.0077046	0.40639	0.078864	-0.048299	-0.016027	0.24245	0.41772	0.30727	0.00032541	0.43551	0.026916	0.26184	0.33525	0.96799	-0.019623	1.2376	0.52399	0.46275	0.22506	-0.09409
25.3968254	0.16922	0.0022498	0.016248	0.00213	0.016444	0.066762	0.50944	0.33597	0.082658	0.28293	0.013394	0.012776	0.11136	0.051766	-0.046776	-0.070503	0.71358	0.068514	0.030939	-0.019217	0.45354	0.06962	0.031209	0.058541	0.056087	-0.011087	-0.011361	0.58922	0.20561	0.010707	0.42965	0.084588	-0.068119	-0.0082612	0.27548	0.4642	0.42222	-0.0099749	0.38916	0.03115	0.24625	0.33917	0.82153	0.00030444	1.2982	0.42052	0.4869	0.2837	-0.096308
25.46897547	0.15609	-0.012981	0.01645	-0.025549	0.0097327	0.089227	0.56519	0.32317	0.082	0.23865	0.016666	-0.015349	0.11657	0.050792	-0.043149	-0.043098	0.71392	0.1769	0.079419	-0.008873	0.44232	0.079313	0.073906	0.11372	0.054071	-0.053974	-0.03613	0.56756	0.2182	-0.0033714	0.42655	0.083522	-0.072938	-0.012861	0.29912	0.66619	0.53294	-0.030692	0.39863	0.043628	0.27302	0.34001	0.82263	0.035964	1.2988	0.37939	0.45913	0.32574	-0.12564
25.54112554	0.14032	-0.0045225	0.015517	-0.010869	-0.0039712	0.1007	0.60993	0.26234	0.088365	0.23813	-0.002838	-0.041425	0.11249	0.04189	-0.053134	-0.043483	0.69372	0.19962	0.077367	0.019008	0.45992	0.099747	0.11532	0.1636	0.054625	-0.090351	-0.05692	0.55545	0.2334	-0.010682	0.39813	0.12606	-0.074517	-0.042431	0.27117	0.98919	0.63707	-0.041776	0.39904	0.032723	0.26271	0.31805	0.88284	0.099354	1.2099	0.40139	0.44168	0.31997	-0.1029
25.61327561	0.16235	0.013887	0.015893	0.0043639	-0.0096332	0.091886	0.59184	0.22035	0.10936	0.25106	-0.0066513	-0.0171	0.10902	0.034197	-0.060245	-0.048787	0.68146	0.18611	0.053551	0.037562	0.44196	0.12124	0.10374	0.19727	0.075861	-0.1214	-0.075977	0.57496	0.23718	-0.0055729	0.39456	0.1612	-0.069271	-0.065241	0.21495	1.238	0.77644	-0.038677	0.36916	0.011802	0.2458	0.27121	0.87537	0.15396	1.1844	0.4086	0.4017	0.2878	-0.035221
25.68542569	0.20751	0.037706	-0.0086149	-0.00083697	-0.021171	0.061343	0.54473	0.23134	0.12301	0.24339	0.01417	0.038134	0.10919	0.040895	-0.050345	-0.044409	0.67245	0.16526	0.053609	0.063438	0.39758	0.13766	0.10488	0.25252	0.080731	-0.1302	-0.104	0.53807	0.22975	-0.0056414	0.40068	0.15295	-0.064778	-0.049683	0.18443	1.371	0.90196	-0.032842	0.35148	0.023583	0.23511	0.21942	0.90906	0.15522	1.2079	0.36618	0.33872	0.24961	0.019029
25.75757576	0.22878	0.052592	-0.0083426	-0.010575	-0.026093	0.052311	0.54239	0.23116	0.12656	0.2604	0.022679	0.058179	0.11848	0.057222	-0.024511	-0.043473	0.68453	0.14895	0.093442	0.067433	0.40448	0.14204	0.13142	0.31975	0.057128	-0.12521	-0.11307	0.49898	0.22009	0.0012622	0.40192	0.13477	-0.071452	-0.031945	0.1796	1.4383	1.0314	-0.046872	0.41823	0.048905	0.1878	0.19711	0.96579	0.13552	1.1926	0.37231	0.32212	0.23715	-0.028471
25.82972583	0.21365	0.060958	-0.01232	-0.0091626	-0.00089318	0.069025	0.54991	0.20452	0.12283	0.29243	0.023601	0.034388	0.13485	0.076597	-0.01418	-0.054798	0.68236	0.15039	0.12033	0.078986	0.4235	0.14867	0.13963	0.37828	0.023948	-0.12011	-0.10724	0.48508	0.21057	-0.0011899	0.37187	0.11836	-0.073465	-0.031999	0.1616	1.4904	1.1938	-0.058681	0.50513	0.090874	0.14236	0.1983	1.0074	0.1036	1.1312	0.40752	0.43439	0.24883	-0.08808
25.9018759	0.24244	0.05288	-0.030436	0.0022576	0.0045163	0.097502	0.56255	0.16483	0.10053	0.26328	0.01203	0.015871	0.12863	0.076071	-0.021208	-0.060444	0.62819	0.14353	0.10552	0.1065	0.42521	0.1383	0.10665	0.41194	0.020287	-0.13267	-0.11821	0.45346	0.19696	-0.038637	0.32839	0.12533	-0.034525	-0.012283	0.16554	1.4596	1.3048	-0.040469	0.53374	0.13815	0.11214	0.18805	0.98831	0.078727	1.125	0.38915	0.5379	0.24356	-0.08293
25.97402597	0.25969	0.017297	-0.022338	-0.015608	0.0018826	0.12855	0.53474	0.14698	0.089879	0.21546	-0.008934	0.018167	0.11168	0.056146	-0.022262	-0.070963	0.58004	0.2019	0.12377	0.085622	0.4223	0.12564	0.080133	0.45898	0.036743	-0.14835	-0.12467	0.46076	0.18661	-0.07285	0.32543	0.16064	0.02997	0.038969	0.1938	1.3616	1.3593	0.0026896	0.57689	0.12067	0.12144	0.17499	0.92813	0.073384	1.1433	0.3571	0.49439	0.24179	-0.082081
26.04617605	0.23079	0.0051449	-0.0068581	-0.023073	0.011609	0.15638	0.48303	0.15447	0.10169	0.21111	-0.030054	0.019993	0.096716	0.034473	-0.013425	-0.068054	0.64632	0.45269	0.20428	0.033596	0.43251	0.097441	0.090502	0.49812	0.045974	-0.14628	-0.10603	0.44201	0.15445	-0.082956	0.32583	0.16598	0.11456	0.074446	0.21192	1.3264	1.4798	0.015139	0.62695	0.093047	0.12546	0.21123	0.91998	0.049248	1.1047	0.35166	0.44107	0.23216	-0.097391
26.11832612	0.20071	0.031049	-0.0066796	-0.014352	0.033041	0.16579	0.45333	0.1409	0.12228	0.23374	-0.043033	0.0057708	0.094903	0.034391	0.0083133	-0.062076	0.7245	0.87956	0.30336	0.046928	0.41338	0.073905	0.11176	0.51975	0.036871	-0.13363	-0.088767	0.38335	0.12041	-0.097601	0.29895	0.15402	0.20201	0.084051	0.2289	1.3313	1.6392	0.017524	0.63109	0.11125	0.10588	0.31653	0.92846	0.059696	0.97748	0.3597	0.53231	0.19658	-0.097669
26.19047619	0.19713	0.035356	-0.0026362	0.0082184	0.046241	0.13543	0.43235	0.11889	0.12431	0.22227	-0.022465	0.0020912	0.096937	0.049645	0.024608	-0.060278	0.7397	1.159	0.35596	0.10087	0.34343	0.087574	0.12157	0.52839	0.037237	-0.11698	-0.075961	0.37585	0.091742	-0.072074	0.26336	0.15421	0.26567	0.069392	0.24305	1.2579	1.7452	0.023207	0.6159	0.11623	0.087968	0.40207	0.91221	0.062335	0.91224	0.37649	0.66976	0.18964	-0.10312
26.26262626	0.23007	0.012103	0.025671	0.011281	0.033327	0.11054	0.40037	0.13167	0.10356	0.18013	-0.008083	0.010772	0.12063	0.067887	0.034279	-0.069424	0.70198	1.1981	0.35651	0.090522	0.28421	0.11504	0.12544	0.53229	0.038928	-0.11376	-0.066074	0.3834	0.092541	-0.033402	0.24315	0.16045	0.32369	0.04598	0.24817	1.1511	1.7756	0.018912	0.61509	0.086258	0.096629	0.4565	0.9441	0.0038947	0.90832	0.40628	0.68883	0.21789	-0.10464
26.33477633	0.2353	-0.023654	0.053901	0.029336	0.024076	0.093965	0.35382	0.14856	0.087786	0.16187	0.018274	0.046198	0.14695	0.076648	0.034548	-0.073946	0.63691	1.1561	0.31373	0.077462	0.28949	0.12323	0.12115	0.5318	0.033113	-0.13635	-0.072278	0.33809	0.11611	-0.041756	0.24954	0.18353	0.36762	0.050696	0.27948	1.1058	1.8488	0.026307	0.63136	0.11936	0.093778	0.48637	0.94803	-0.019494	0.91789	0.42639	0.69303	0.23504	-0.10898
26.40692641	0.2139	-0.056364	0.064957	0.046107	0.038414	0.098517	0.35476	0.11932	0.087843	0.15409	0.043692	0.09801	0.14336	0.080149	0.016382	-0.056872	0.5765	1.1107	0.23289	0.10742	0.34197	0.12802	0.126	0.51886	0.019156	-0.16087	-0.10216	0.25865	0.11097	-0.039592	0.24767	0.2088	0.35281	0.084269	0.34136	1.096	1.9264	0.029624	0.63253	0.18104	0.1041	0.47902	0.91155	0.016215	0.94776	0.41603	0.70274	0.22278	-0.11895
26.47907648	0.23098	-0.079788	0.05662	0.030629	0.069364	0.10286	0.38008	0.088117	0.089053	0.1508	0.050292	0.093684	0.11822	0.094771	0.0069916	-0.035221	0.56928	1.0806	0.17626	0.12619	0.36468	0.142	0.1483	0.51315	0.00073567	-0.15699	-0.094736	0.2436	0.11357	0.00067468	0.20565	0.21821	0.33845	0.094691	0.41388	1.0778	1.9693	0.023486	0.59077	0.18108	0.10287	0.46152	0.83311	0.054554	0.96117	0.35119	0.69479	0.1651	-0.10138
26.55122655	0.25449	-0.095697	0.058375	0.016903	0.078516	0.06961	0.37764	0.084057	0.072456	0.16378	0.060433	0.064617	0.093012	0.080506	-0.0056332	-0.0078444	0.58789	1.049	0.1864	0.11236	0.31792	0.14496	0.15279	0.52746	0.0052416	-0.14555	-0.057041	0.25551	0.15074	0.015164	0.18597	0.20742	0.34551	0.090616	0.46812	1.0061	2.1823	0.0144	0.55207	0.16332	0.072995	0.51795	0.78958	0.079837	0.96197	0.26902	0.71255	0.15024	-0.065016
26.62337662	0.23557	-0.086677	0.052919	0.017545	0.056006	0.031773	0.38818	0.081009	0.05071	0.16236	0.057905	0.040769	0.089687	0.043547	-0.028089	0.0065511	0.55341	0.91304	0.17091	0.088929	0.24551	0.13602	0.13291	0.52295	0.026236	-0.13983	-0.019879	0.25836	0.20979	-0.015882	0.19686	0.18829	0.3922	0.086785	0.48233	0.9072	2.5931	-0.005049	0.53763	0.16846	0.042815	0.58445	0.81433	0.11545	0.9367	0.26154	0.75485	0.1672	-0.050313
26.6955267	0.19621	-0.070933	0.032083	0.027252	0.042367	0.044595	0.39419	0.073514	0.049339	0.16456	0.007022	0.036924	0.094249	0.010717	-0.024518	0.0011122	0.50301	0.78974	0.14636	0.073566	0.22841	0.12131	0.10656	0.46134	0.037162	-0.12259	0.030413	0.22653	0.27068	-0.012875	0.19982	0.18214	0.51359	0.073847	0.45674	0.86776	2.8921	0.011927	0.50679	0.16771	0.065184	0.55463	0.7935	0.12312	0.88601	0.29169	0.77479	0.2031	-0.057788
26.76767677	0.17596	-0.070764	0.0069906	0.038647	0.050938	0.081477	0.36664	0.049488	0.063479	0.14023	-0.023017	0.028904	0.096002	0.010884	-0.009738	-0.0088662	0.45509	0.73302	0.15712	0.041911	0.22708	0.10063	0.084437	0.41908	0.053322	-0.090955	0.076239	0.21316	0.28735	-0.0026681	0.20773	0.18944	0.63458	0.046841	0.42577	0.86249	2.9529	0.031248	0.49002	0.13708	0.11711	0.50519	0.69022	0.097354	0.85057	0.27038	0.78965	0.24568	-0.050851
26.83982684	0.17187	-0.10588	-0.015407	0.06319	0.029456	0.1096	0.34164	0.024133	0.073523	0.13118	0.00074899	0.018829	0.10162	0.042292	-0.010187	-0.0043335	0.42714	0.70064	0.14067	0.022707	0.20294	0.079733	0.075133	0.40607	0.095702	-0.055395	0.10622	0.26496	0.27549	-0.0050859	0.22081	0.19285	0.72356	0.017596	0.38663	0.78835	2.9544	0.033419	0.52485	0.090074	0.12695	0.53494	0.64808	0.082394	0.86887	0.22583	0.78325	0.29156	-0.040503
26.91197691	0.1526	-0.14346	-0.009079	0.093035	0.023256	0.14655	0.3067	0.027401	0.08441	0.13634	0.017967	0.011384	0.11414	0.076532	-0.019915	0.0044478	0.43013	0.69358	0.13092	0.025188	0.21548	0.07505	0.076833	0.40562	0.13974	-0.02704	0.1238	0.27503	0.25691	-0.011119	0.24814	0.19362	0.78628	-0.0023056	0.3549	0.71059	2.9542	0.035611	0.61552	0.064037	0.081593	0.57649	0.68694	0.072648	0.83961	0.25711	0.78496	0.31954	-0.040976
26.98412698	0.13641	-0.13693	0.012976	0.10554	0.035748	0.1742	0.25678	0.043871	0.079817	0.13984	0.025233	0.035219	0.13487	0.089976	-0.025105	0.0040544	0.44397	0.66655	0.14161	0.029333	0.22803	0.094299	0.090783	0.41919	0.1524	-0.0069845	0.14431	0.27756	0.22361	0.00054054	0.24227	0.17414	0.83622	-0.0028454	0.4062	0.69737	2.8493	0.028627	0.6943	0.054952	0.034781	0.57655	0.68337	0.053129	0.7231	0.32379	0.79074	0.33744	-0.048886
27.05627706	0.14324	-0.097657	0.018178	0.09463	0.034391	0.18222	0.2312	0.034834	0.06282	0.13175	0.020307	0.066271	0.14923	0.083815	-0.01245	-0.00068499	0.3893	0.61508	0.12516	0.032551	0.19891	0.13268	0.1111	0.40997	0.14352	-0.0056002	0.14732	0.214	0.19101	0.041674	0.2003	0.1736	0.88987	0.0088389	0.54406	0.68414	2.6024	0.0022289	0.73374	0.054934	0.031055	0.54408	0.62854	0.059636	0.63993	0.3145	0.76639	0.37122	-0.046387
27.12842713	0.12954	-0.06217	0.022417	0.062339	-0.0071532	0.17986	0.22909	0.024004	0.087701	0.12039	0.019588	0.065513	0.13902	0.081785	0.0091336	-0.0053049	0.29568	0.55582	0.12305	0.022572	0.17817	0.15032	0.11824	0.37698	0.12378	-0.00095658	0.15217	0.14827	0.15099	0.053527	0.15857	0.1628	0.93589	0.015675	0.63055	0.6262	2.453	-0.016313	0.77731	0.056182	0.092586	0.49416	0.56005	0.09636	0.6143	0.29213	0.79223	0.35553	-0.00088073
27.2005772	0.081417	-0.05035	0.032508	0.039207	-0.031696	0.17086	0.23765	0.029095	0.12606	0.10662	0.018353	0.050061	0.11768	0.077311	0.010073	-0.0069877	0.20043	0.50259	0.14971	0.0087883	0.19459	0.12479	0.10232	0.35948	0.11396	0.0028643	0.16798	0.18697	0.12855	0.010788	0.1325	0.12974	0.94557	0.016792	0.65599	0.56989	2.5557	-0.010508	0.9444	0.040897	0.16504	0.46674	0.53103	0.085121	0.6429	0.315	0.86619	0.33545	0.031849
27.27272727	0.048885	-0.069578	0.035627	0.026912	0.0011713	0.14476	0.27335	0.025361	0.11883	0.10674	-0.0065215	0.03294	0.09968	0.079385	0.0050281	-0.007144	0.16683	0.46727	0.15445	0.018412	0.20936	0.11059	0.075143	0.35348	0.13947	0.010385	0.18557	0.19782	0.090937	0.0013577	0.13787	0.1314	0.89971	0.012303	0.65426	0.57655	2.6279	-0.014379	1.1425	0.062392	0.24121	0.44244	0.51234	0.049358	0.61336	0.34325	0.91609	0.34879	0.039456
27.34487734	0.024478	-0.087084	0.012422	0.0063584	0.0097075	0.11227	0.30958	0.028102	0.087035	0.10395	-0.007502	0.018538	0.072431	0.092671	0.0090864	-4.12E-05	0.15105	0.45013	0.14038	0.038473	0.20951	0.11352	0.041423	0.33913	0.19021	0.014172	0.19751	0.23024	0.061868	0.019165	0.15471	0.14936	0.89029	0.00017075	0.65589	0.58664	2.5729	-0.037221	1.1878	0.10717	0.35018	0.37284	0.49315	0.038289	0.54837	0.38272	0.90736	0.35874	0.058965
27.41702742	0.018448	-0.071322	-0.0055144	-0.033713	-0.011211	0.11972	0.34297	0.016986	0.079732	0.1046	0.0059956	0.035674	0.034897	0.091824	0.0092769	0.0030716	0.17049	0.43174	0.15106	0.075913	0.19874	0.1186	0.024037	0.30411	0.21725	0.018542	0.1863	0.22615	0.041326	0.021275	0.16746	0.14714	0.88337	-0.023662	0.66819	0.56185	2.4953	-0.035747	1.1945	0.14941	0.45105	0.30467	0.48391	0.023299	0.50581	0.4036	0.83228	0.34897	0.049079
27.48917749	0.00228	-0.047462	-0.00056591	-0.034556	-0.0089088	0.22601	0.3356	-0.0092813	0.10111	0.11702	0.0157	0.06783	0.044357	0.091739	-0.0046	0.0093074	0.21703	0.39635	0.15607	0.097106	0.18485	0.1135	0.012989	0.31194	0.23737	0.030108	0.19294	0.22225	0.038196	0.013594	0.1856	0.13009	0.83696	-0.03175	0.62068	0.59204	2.4522	-0.017643	1.2458	0.20829	0.44994	0.33946	0.50237	0.024102	0.45036	0.39354	0.81832	0.29994	0.022921
27.56132756	-0.02585	-0.04897	0.0060477	-0.0012721	-0.02792	0.41073	0.3094	-0.013826	0.11033	0.12845	0.028424	0.083998	0.081986	0.093122	-0.024373	0.029582	0.23306	0.40768	0.17124	0.074611	0.17862	0.10413	0.018121	0.33535	0.27592	0.036825	0.20452	0.20281	0.057703	0.01781	0.22879	0.10714	0.8088	-0.026347	0.54414	0.73717	2.3149	-0.013859	1.2255	0.23422	0.40908	0.36989	0.46663	0.030744	0.39353	0.3647	0.8793	0.24901	0.037421
27.63347763	-0.019903	-0.053645	-0.010271	0.019677	-0.061824	0.57753	0.30128	0.0064645	0.11711	0.1126	0.044587	0.072751	0.087622	0.086935	-0.012529	0.042961	0.22815	0.47678	0.18516	0.063785	0.17788	0.11716	0.040569	0.30119	0.31001	0.039597	0.18688	0.20437	0.091153	-0.018068	0.25905	0.10721	0.78552	-0.03316	0.48737	0.92964	2.1564	-0.036728	1.141	0.22117	0.407	0.31733	0.39656	0.024417	0.36443	0.33946	0.8572	0.2459	0.040235
27.70562771	0.01115	-0.061213	-0.022588	0.01618	-0.075316	0.69437	0.30426	0.025382	0.12182	0.11418	0.026394	0.055872	0.071053	0.057268	0.0019089	0.03243	0.22341	0.5122	0.17984	0.087716	0.19681	0.15653	0.075698	0.27493	0.31893	0.019421	0.1713	0.21891	0.11046	-0.027713	0.24165	0.13757	0.76251	-0.048109	0.46506	1.0498	2.0454	-0.056194	1.1036	0.21385	0.43442	0.24543	0.40843	0.024763	0.3641	0.33107	0.75375	0.23097	0.033531
27.77777778	0.021107	-0.053934	0.001712	-0.0072671	-0.074455	0.73578	0.3142	0.033268	0.12032	0.14721	-0.0059531	0.065118	0.053911	0.015901	-0.0093958	0.028727	0.18594	0.51192	0.20972	0.11515	0.18663	0.2118	0.11518	0.27079	0.33705	-0.030123	0.13991	0.24398	0.10783	-0.02202	0.20026	0.13612	0.72966	-0.059895	0.45074	1.1112	1.9675	-0.054412	1.0888	0.21323	0.41903	0.24444	0.39758	0.052655	0.37461	0.34498	0.70955	0.19592	0.02844
27.84992785	0.012433	-0.063759	0.016233	-0.039143	-0.053878	0.71897	0.31589	0.05158	0.12136	0.16532	0.00453	0.067375	0.050775	0.0014698	-0.0066049	0.017718	0.15097	0.50819	0.2877	0.12729	0.13508	0.27587	0.14511	0.2951	0.35238	-0.068799	0.10973	0.28628	0.10828	-0.030075	0.18976	0.12748	0.65039	-0.054584	0.41448	1.1366	1.8953	-0.062583	1.0184	0.20546	0.3994	0.29613	0.34385	0.061906	0.38477	0.33733	0.75224	0.17956	0.034339
27.92207792	-0.0060763	-0.072208	0.020788	-0.042303	-0.034018	0.69732	0.27924	0.041789	0.10748	0.15315	0.027651	0.067574	0.045636	0.036485	-0.0044711	-0.014039	0.11434	0.4763	0.33131	0.119	0.099918	0.33652	0.16156	0.32236	0.33779	-0.09163	0.084534	0.34205	0.10112	-0.035187	0.21023	0.15579	0.56839	-0.051551	0.37506	1.1264	1.8122	-0.073888	0.93771	0.2444	0.42496	0.3279	0.3111	0.058419	0.36012	0.2849	0.80186	0.1648	0.0097327
27.99422799	-0.027295	-0.051644	0.016711	-0.0091199	0.013387	0.67563	0.23794	0.026936	0.089402	0.15361	0.023598	0.064733	0.018757	0.079996	-0.037162	-0.031044	0.075879	0.40548	0.30504	0.10447	0.091295	0.36316	0.15518	0.31272	0.29754	-0.096978	0.060859	0.41671	0.079553	-0.033631	0.20564	0.17925	0.59622	-0.065185	0.37528	1.0731	1.7878	-0.064114	0.88739	0.35466	0.45085	0.29223	0.29987	0.044119	0.35465	0.24238	0.82025	0.16667	-0.020424
28.06637807	-0.039878	-0.037773	0.007776	0.0051687	0.056455	0.60066	0.20684	0.04772	0.086276	0.15694	0.032627	0.074518	0.010228	0.084149	-0.06491	-0.029745	0.066878	0.38723	0.26149	0.067681	0.086817	0.36914	0.13767	0.31202	0.2326	-0.10096	0.055325	0.54054	0.040009	-0.035223	0.16886	0.16897	0.6793	-0.077392	0.34937	1.0251	1.835	-0.058788	0.92909	0.48283	0.44506	0.25851	0.31027	0.055979	0.32567	0.25263	0.7826	0.15969	-0.0072077
28.13852814	-0.038444	-0.032426	-0.025419	-0.013115	0.073618	0.52212	0.17263	0.060282	0.089288	0.14097	0.047234	0.083119	0.049772	0.092145	-0.040634	-0.01469	0.052428	0.37503	0.21775	0.051295	0.075349	0.37243	0.15774	0.33778	0.1925	-0.10792	0.057989	0.68105	0.020693	-0.025158	0.1467	0.1553	0.7071	-0.069548	0.29063	0.98436	1.7696	-0.070994	1.0288	0.53954	0.41815	0.27826	0.31369	0.063424	0.23273	0.27702	0.682	0.15128	-0.016291
28.21067821	-0.061166	-0.025518	-0.057874	-0.019	0.070528	0.49154	0.13612	0.054372	0.094946	0.12635	0.060177	0.078631	0.073712	0.12155	-0.0038697	0.005265	0.021435	0.32549	0.18205	0.07695	0.050788	0.37987	0.14748	0.32408	0.17951	-0.098488	0.064589	0.73721	0.028671	-0.0045053	0.15429	0.15691	0.71694	-0.051444	0.25609	0.95276	1.6078	-0.065851	1.1821	0.53327	0.4011	0.34822	0.28775	0.068929	0.16937	0.30409	0.60324	0.17397	-0.036276
28.28282828	-0.070143	-0.025655	-0.040604	-0.002387	0.06182	0.47321	0.13922	0.052638	0.10479	0.12025	0.075489	0.062379	0.05002	0.12231	0.024531	0.014742	0.0094901	0.30853	0.18194	0.089968	0.054495	0.39548	0.12026	0.27557	0.13653	-0.074149	0.074451	0.72329	0.031042	-0.00037788	0.16409	0.13737	0.67186	-0.046018	0.25375	0.95623	1.51	-0.024864	1.3272	0.50068	0.35707	0.3987	0.2941	0.10303	0.17092	0.31666	0.57525	0.15416	-0.027722
28.35497835	-0.028397	-0.037129	0.0046515	0.0079859	0.042705	0.38968	0.18104	0.038778	0.10598	0.12422	0.067282	0.051759	0.0402	0.12254	0.030225	0.024736	0.024732	0.33599	0.1886	0.1076	0.063834	0.4057	0.1225	0.23931	0.079746	-0.055018	0.082852	0.68387	0.015792	-0.0066866	0.18189	0.11576	0.58945	-0.057998	0.2293	0.98788	1.4937	0.0030136	1.3737	0.46455	0.31678	0.43363	0.37284	0.12053	0.17405	0.31077	0.59213	0.091117	-0.0085229
28.42712843	0.0078232	-0.017212	0.0057267	0.026352	0.015465	0.30167	0.20974	0.024953	0.092093	0.10653	0.057972	0.060656	0.03959	0.13859	0.015042	0.046843	0.016924	0.32235	0.18734	0.14016	0.065804	0.38192	0.1323	0.24502	0.05274	-0.042399	0.096629	0.63297	0.0044346	-0.0086928	0.20393	0.11267	0.55153	-0.043492	0.19294	1.0263	1.426	-0.0082349	1.4142	0.43577	0.34189	0.44894	0.4266	0.11559	0.13735	0.29417	0.57936	0.098587	0.014192
28.4992785	-0.0082555	-0.01309	0.0048959	0.051954	0.020432	0.27438	0.19879	0.017646	0.070743	0.10945	0.069602	0.0683	0.025018	0.14531	0.0134	0.058731	-0.0011775	0.30252	0.20279	0.16063	0.074432	0.36335	0.14651	0.26513	0.041203	-0.030322	0.11715	0.5856	0.011683	0.0069929	0.21315	0.09401	0.54047	-0.033595	0.17137	1.0499	1.3168	-0.035171	1.5739	0.43555	0.36635	0.43734	0.39386	0.10015	0.094238	0.28887	0.54554	0.16168	0.02659
28.57142857	-0.07327	-0.029225	0.015725	0.081797	0.026123	0.29806	0.17245	0.020731	0.052635	0.13946	0.07665	0.074377	0.00025981	0.13909	0.019587	0.032457	0.0017758	0.31996	0.21175	0.15818	0.084437	0.37887	0.16273	0.28522	0.030909	-0.045589	0.11314	0.5742	0.024991	0.031485	0.2409	0.079191	0.54829	-0.026695	0.17451	1.0482	1.2496	-0.033916	1.7344	0.42663	0.36298	0.44387	0.39708	0.087303	0.08262	0.30665	0.54614	0.17364	0.042795
28.64357864	-0.11869	-0.035099	0.015661	0.083223	0.013421	0.2966	0.14526	0.030819	0.057762	0.13644	0.069137	0.093915	-0.010035	0.14034	0.025168	-0.0066403	0.022624	0.30899	0.20261	0.11633	0.086844	0.40039	0.16631	0.29218	0.045838	-0.06779	0.08745	0.62324	0.027239	0.063672	0.271	0.096062	0.52421	0.024834	0.16324	1.1456	1.2162	-0.03083	1.8056	0.41231	0.31	0.46446	0.46118	0.059625	0.098533	0.32784	0.55291	0.13533	0.034836
28.71572872	-0.091972	-0.025889	0.036107	0.093757	0.0023189	0.2576	0.14444	0.032853	0.085575	0.10503	0.074386	0.12143	-0.0060964	0.13538	0.032965	-0.015718	0.068154	0.29595	0.2031	0.078333	0.086612	0.38607	0.16452	0.27452	0.053807	-0.078886	0.088667	0.66794	0.041061	0.10238	0.25615	0.1156	0.46329	0.091622	0.13952	1.4329	1.1896	-0.02495	1.7921	0.40195	0.28395	0.49162	0.44886	0.058243	0.11537	0.29616	0.55396	0.067684	-0.014139
28.78787879	-0.041696	-0.022139	0.028398	0.11315	-0.0080379	0.24447	0.14584	0.015461	0.084663	0.071908	0.092005	0.10615	0.0085103	0.14178	0.039766	0.015652	0.10124	0.30149	0.21529	0.071745	0.071135	0.3537	0.15613	0.27023	0.030581	-0.093238	0.083033	0.65246	0.048345	0.14892	0.23921	0.10896	0.42138	0.14414	0.11364	1.6712	1.1218	-0.0059208	1.7472	0.38941	0.24817	0.52545	0.38303	0.10128	0.093943	0.27366	0.54319	0.058647	-0.018254
28.86002886	-0.011644	-0.023079	0.0045642	0.077838	0.0043234	0.22826	0.12443	0.0058052	0.052596	0.069652	0.078884	0.07564	0.018351	0.15852	0.04815	0.031246	0.11344	0.28307	0.22246	0.08043	0.052688	0.31072	0.12251	0.25606	-0.013803	-0.10601	0.066441	0.64056	0.038528	0.19755	0.23753	0.085625	0.47178	0.19211	0.083681	1.7096	1.0582	0.012364	1.695	0.40875	0.2048	0.53337	0.30988	0.12846	0.076535	0.29976	0.5609	0.10398	0.00632
28.93217893	-0.011449	0.018269	-0.015317	0.041184	0.049504	0.21122	0.08478	0.0010824	0.05237	0.085395	0.068855	0.062096	0.034679	0.17004	0.07083	0.008408	0.096073	0.23883	0.20486	0.14341	0.058918	0.26918	0.075085	0.22246	-0.036096	-0.11124	0.076579	0.62466	0.024142	0.2391	0.232	0.063305	0.55853	0.2187	0.064914	1.6899	1.0183	0.046417	1.6313	0.4624	0.20987	0.52203	0.2736	0.13155	0.067988	0.3437	0.55745	0.12722	0.036021
29.004329	-0.028724	0.044899	0.00055791	0.019474	0.067862	0.2105	0.057126	0.0077258	0.062708	0.084793	0.04617	0.04215	0.057332	0.16103	0.077418	-0.025949	0.059565	0.2209	0.21467	0.26551	0.066525	0.27686	0.045736	0.20299	-0.036164	-0.10552	0.10037	0.60417	0.025593	0.27228	0.21961	0.066763	0.58545	0.21205	0.061456	1.7085	0.98279	0.077874	1.5339	0.4797	0.24497	0.48811	0.26506	0.14101	0.032889	0.36497	0.52825	0.14149	0.065557
29.07647908	-0.031149	0.049322	0.042673	0.02939	0.06956	0.21759	0.059182	-0.0076006	0.046016	0.085592	0.0090846	0.013402	0.049986	0.14194	0.068072	-0.036134	0.04949	0.23482	0.23368	0.30064	0.038463	0.33016	0.042406	0.18895	-0.022156	-0.079686	0.1137	0.56048	0.01726	0.29949	0.20712	0.092086	0.58831	0.20117	0.093332	1.6621	0.95726	0.088317	1.4526	0.44597	0.22703	0.48785	0.26996	0.15313	-0.0087347	0.37567	0.50003	0.19495	0.066868
29.14862915	-0.014199	0.064734	0.056169	0.044021	0.061229	0.21316	0.054343	-0.025373	0.043199	0.085367	-0.0030884	0.012649	0.057225	0.1398	0.04814	-0.020207	0.041879	0.23651	0.23008	0.30789	0.00036545	0.34025	0.037386	0.18185	0.0071292	-0.057859	0.13169	0.52896	0.013414	0.31771	0.19666	0.11738	0.64314	0.20604	0.11163	1.5926	0.96662	0.077757	1.431	0.39372	0.16887	0.48528	0.28036	0.16668	-0.00817	0.38903	0.45321	0.21206	0.052227
29.22077922	-0.010185	0.094843	0.046472	0.051402	0.053842	0.22076	0.043211	-0.016595	0.066854	0.065344	-0.0019905	0.040828	0.077651	0.144	0.032785	-0.0080583	0.012262	0.23804	0.24152	0.40936	-0.0083368	0.30313	0.028474	0.19901	0.057488	-0.055713	0.17084	0.51412	0.023706	0.32251	0.17758	0.14066	0.7107	0.2209	0.081008	1.5185	1.0218	0.041507	1.4	0.34316	0.15465	0.48533	0.2798	0.17835	0.014038	0.3931	0.42488	0.18138	0.038634
29.29292929	0.010206	0.1079	0.023841	0.072842	0.059734	0.26611	0.052802	-0.019542	0.081263	0.067225	0.0027721	0.058864	0.086979	0.1312	0.046775	-0.012528	-0.016736	0.25704	0.22983	0.57065	-0.030762	0.2498	0.018656	0.25211	0.09199	-0.056306	0.22663	0.49858	0.060664	0.35679	0.1617	0.15342	0.69418	0.23684	0.043007	1.4294	1.028	0.032456	1.3021	0.32184	0.13246	0.52605	0.26196	0.17032	0.01581	0.38495	0.46233	0.17594	0.048487
29.36507937	0.02973	0.08552	0.0019296	0.073706	0.056425	0.29127	0.054798	-0.020939	0.064481	0.073902	0.0088668	0.065953	0.099436	0.11507	0.057711	-0.030154	-0.014664	0.24526	0.21249	0.69038	-0.070221	0.25082	0.026812	0.30718	0.070364	-0.039323	0.26412	0.49211	0.10245	0.38747	0.13495	0.17684	0.66563	0.24329	0.10205	1.3706	0.96056	0.064717	1.1486	0.33236	0.094454	0.52287	0.23864	0.12867	-0.0093326	0.40396	0.46499	0.19165	0.059056
29.43722944	0.020584	0.065279	-0.019607	0.055741	0.030492	0.28969	0.053223	-0.03561	0.030386	0.055864	0.003892	0.07191	0.11925	0.11057	0.055042	-0.035966	-0.011269	0.17123	0.19856	0.7331	-0.072639	0.28012	0.031076	0.369	0.041961	-0.010565	0.31773	0.45991	0.15474	0.35707	0.11231	0.18937	0.66419	0.22665	0.33608	1.3703	0.91641	0.094134	1.0515	0.32254	0.082827	0.43885	0.18409	0.1034	0.010635	0.39906	0.46292	0.18274	0.050303
29.50937951	-0.012178	0.066693	-0.0024499	0.07541	0.0095786	0.27847	0.069748	-0.034225	0.027923	0.042544	-0.018581	0.05849	0.13188	0.11629	0.069912	-0.034371	-0.025859	0.1147	0.17083	0.71935	-0.024676	0.27412	0.026257	0.42979	0.047767	0.02336	0.37448	0.41575	0.22481	0.26961	0.10427	0.18626	0.60259	0.19672	0.62336	1.3542	0.9125	0.11105	1.0612	0.29693	0.14188	0.37106	0.15644	0.071283	0.11257	0.32704	0.50397	0.11409	0.079069
29.58152958	-0.056953	0.10072	0.024956	0.12798	0.0044591	0.27766	0.089791	-0.0053257	0.052482	0.046911	-0.022778	0.02769	0.12823	0.11615	0.10186	-0.018716	-0.034529	0.10464	0.11572	0.69477	0.046701	0.29214	0.038446	0.4533	0.06581	0.050198	0.393	0.37277	0.27227	0.22972	0.10018	0.18469	0.52862	0.1926	0.77355	1.2761	0.87466	0.10965	1.068	0.28227	0.20139	0.37626	0.17399	0.027914	0.24006	0.25975	0.5129	0.097499	0.12376
29.65367965	-0.02173	0.13147	0.010702	0.14175	-0.011345	0.2509	0.081834	0.00075032	0.049773	0.050044	-0.018086	0.0073169	0.12219	0.091031	0.095704	-0.0027544	-0.0031182	0.067362	0.056579	0.66252	0.087299	0.30881	0.022995	0.52228	0.098215	0.068078	0.4348	0.35533	0.31344	0.2402	0.11778	0.19235	0.48135	0.17302	0.79364	1.2328	0.86537	0.081569	1.012	0.28218	0.19707	0.38969	0.15184	0.015138	0.3444	0.22494	0.48603	0.098781	0.14529
29.72582973	0.052795	0.14859	-0.036164	0.089984	-0.0096416	0.22996	0.069985	-0.0088389	0.021121	0.044549	-0.011997	0.01179	0.12	0.05723	0.089888	-0.0048946	0.022502	0.043035	0.025192	0.63687	0.093545	0.28641	-0.0033439	0.58575	0.13134	0.086714	0.51783	0.3508	0.36148	0.25752	0.13198	0.19228	0.4393	0.13913	0.77847	1.2403	0.88309	0.058805	0.97802	0.28215	0.20031	0.35446	0.11218	0.037445	0.40021	0.23075	0.4265	0.088189	0.18589
29.7979798	0.078307	0.15615	-0.051384	0.049787	0.030251	0.21148	0.055048	-0.016878	0.020522	0.052412	0.0094303	0.0055894	0.11354	0.045503	0.10783	-0.023325	-0.0015693	0.063411	0.014955	0.58719	0.10183	0.26059	-0.0035992	0.57041	0.12439	0.13119	0.57908	0.33988	0.41319	0.25666	0.10518	0.16848	0.40605	0.12102	0.75125	1.2313	0.86972	0.060799	0.9913	0.26993	0.21013	0.30818	0.1482	0.063592	0.41063	0.34075	0.36735	0.11334	0.24329
29.87012987	0.053831	0.16794	-0.030698	0.040284	0.038584	0.17011	0.0462	-0.028597	0.039617	0.055428	0.028464	0.0061163	0.091169	0.046096	0.11766	-0.030549	-0.05086	0.071644	0.017343	0.52199	0.088487	0.27128	0.014144	0.5463	0.11074	0.1785	0.60835	0.30862	0.43277	0.21424	0.075018	0.16173	0.36505	0.095259	0.73043	1.1636	0.80427	0.0625	0.97281	0.27646	0.18873	0.29621	0.20171	0.075203	0.40427	0.43769	0.3528	0.1201	0.19824
29.94227994	0.044007	0.16823	-0.0051795	0.042719	0.020913	0.12864	0.043438	-0.021081	0.046056	0.037588	0.022589	0.028324	0.097686	0.054825	0.11464	-0.013259	-0.060567	0.025646	-0.021796	0.49069	0.064924	0.339	0.030058	0.50257	0.10169	0.20123	0.62761	0.27061	0.37892	0.18222	0.06796	0.17294	0.33952	0.069851	0.71721	1.0981	0.75355	0.042048	0.90348	0.33202	0.14605	0.31646	0.19023	0.088027	0.41617	0.44485	0.37861	0.090807	0.15763
30.01443001	0.056116	0.16426	0.014503	0.034632	0.037503	0.12376	0.027064	-0.0037713	0.06164	0.01336	0.021036	0.046352	0.12004	0.068404	0.097989	0.00068434	-0.032202	-0.022544	-0.0621	0.46643	0.043659	0.38968	0.039216	0.46991	0.091334	0.22189	0.62561	0.24969	0.35919	0.17192	0.074652	0.16986	0.30906	0.060292	0.69374	1.0238	0.75431	0.018827	0.85751	0.39836	0.098469	0.31054	0.1628	0.10103	0.43301	0.45245	0.4068	0.040728	0.1581
30.08658009	0.047124	0.16554	0.024931	-0.014679	0.058171	0.13706	0.011936	0.014621	0.060593	0.019216	0.029395	0.055965	0.11531	0.072618	0.076351	-0.0086968	0.0061565	-0.0073283	-0.080082	0.3789	0.040256	0.41199	0.04954	0.43054	0.095998	0.23416	0.59019	0.24587	0.37712	0.15389	0.090606	0.17736	0.25542	0.049943	0.66742	0.95733	0.78463	0.012297	0.85481	0.39409	0.071891	0.28661	0.13322	0.13728	0.42106	0.47652	0.37741	0.0083345	0.15379
30.15873016	0.059187	0.15864	0.015103	-0.058534	0.06619	0.16206	0.027161	0.018213	0.055175	0.035467	0.041124	0.060038	0.099149	0.055482	0.066368	-0.021075	0.038691	0.02801	-0.075905	0.29806	0.063213	0.43623	0.068251	0.42801	0.10645	0.24482	0.54909	0.24472	0.37374	0.1237	0.11072	0.22264	0.21676	0.035658	0.63972	0.95077	0.81858	0.0068849	0.87238	0.34094	0.1034	0.30008	0.1401	0.20682	0.44099	0.45272	0.30539	0.0236	0.20242
30.23088023	0.11708	0.13535	-0.0034863	-0.033772	0.056124	0.16939	0.038068	0.0068153	0.062376	0.044726	0.050626	0.03544	0.091165	0.049129	0.080402	-0.019434	0.043441	0.025246	-0.062071	0.26276	0.077378	0.46268	0.075045	0.45313	0.118	0.27746	0.53712	0.22966	0.35541	0.11703	0.10901	0.28186	0.1897	0.044971	0.63107	0.95714	0.84752	-0.01711	0.93632	0.33213	0.16478	0.31429	0.12044	0.24143	0.47538	0.38011	0.24446	0.032564	0.319
30.3030303	0.164	0.13528	-0.012915	0.025024	0.088094	0.16927	0.043191	0.0024084	0.051907	0.06368	0.05137	0.010285	0.1041	0.073338	0.07917	-0.0080003	0.048143	-0.013703	-0.049917	0.21932	0.076253	0.47617	0.058366	0.51241	0.11685	0.31323	0.53622	0.19487	0.3303	0.14866	0.083309	0.30626	0.13954	0.058911	0.62192	0.91039	0.85462	-0.017827	1.0829	0.33433	0.15877	0.32164	0.076561	0.25493	0.44941	0.35311	0.20915	0.046495	0.35482
30.37518038	0.16419	0.1622	-0.013891	0.080912	0.13741	0.17196	0.063767	0.016189	0.041373	0.090924	0.042387	0.022981	0.12132	0.10741	0.05296	0.0081486	0.071532	-0.018002	-0.047261	0.14856	0.078599	0.4893	0.04792	0.54397	0.10779	0.35812	0.55381	0.1658	0.32205	0.16247	0.05767	0.28779	0.097746	0.039847	0.59385	0.83916	0.83224	0.0052724	1.2421	0.30606	0.13382	0.30928	0.083261	0.22919	0.43152	0.37758	0.17044	0.042288	0.33835
30.44733045	0.15213	0.14077	0.00062099	0.11035	0.13268	0.1615	0.085191	0.0013198	0.050446	0.095238	0.054367	0.05128	0.12262	0.08419	0.048226	0.020167	0.044941	-0.020043	-0.08532	0.07804	0.088016	0.48726	0.047656	0.49914	0.098215	0.37835	0.56961	0.15621	0.29502	0.13442	0.039747	0.25703	0.091959	0.014894	0.57755	0.8102	0.80706	-0.013644	1.2724	0.25472	0.14178	0.31572	0.085103	0.18195	0.44722	0.37677	0.15489	0.018481	0.37621
30.51948052	0.14008	0.11625	-0.0015647	0.17075	0.10012	0.1554	0.069782	-0.034135	0.049904	0.070389	0.081706	0.064773	0.11663	0.05169	0.061078	0.024854	-0.0037043	-0.039508	-0.12274	0.033587	0.087788	0.49015	0.057693	0.45122	0.08812	0.41229	0.58556	0.14884	0.24722	0.11395	0.042801	0.2346	0.11065	0.002531	0.58542	0.81101	0.78458	-0.064682	1.227	0.22352	0.1377	0.35428	0.049401	0.15486	0.42365	0.30712	0.18411	0.01778	0.45218
30.59163059	0.16102	0.10872	-0.02753	0.23635	0.10504	0.18451	0.032728	-0.059094	0.036414	0.041883	0.11061	0.06883	0.098737	0.035306	0.065257	0.0089803	-0.0090088	-0.042707	-0.1097	0.055841	0.05238	0.48801	0.07454	0.40776	0.076693	0.42843	0.57946	0.14291	0.22262	0.1195	0.062982	0.21774	0.097199	0.024124	0.5958	0.78235	0.79771	-0.063063	1.2189	0.20067	0.1475	0.3917	0.018715	0.1488	0.39331	0.29032	0.18014	0.062498	0.50024
30.66378066	0.16464	0.10653	-0.034179	0.21652	0.1155	0.19302	0.018802	-0.05938	0.012899	0.043826	0.11654	0.059453	0.063606	0.022339	0.039537	-0.012596	0.029224	-0.033824	-0.082504	0.13708	0.01981	0.49311	0.11438	0.36924	0.084553	0.38133	0.5441	0.13173	0.24856	0.11333	0.045151	0.20748	0.060914	0.045145	0.57676	0.70832	0.79726	-0.024654	1.237	0.1841	0.23337	0.37894	0.066648	0.14009	0.40521	0.35329	0.14214	0.11653	0.60567
30.73593074	0.13908	0.09306	-0.013456	0.17119	0.12713	0.17865	0.0043595	-0.026472	-0.01605	0.040448	0.10077	0.045102	0.028555	0.0063634	0.027078	-0.018287	0.057491	-0.013827	-0.053246	0.19326	0.029295	0.49578	0.15604	0.35264	0.12015	0.38725	0.51113	0.11823	0.30841	0.088843	0.031268	0.19531	0.050739	0.045739	0.53114	0.63763	0.74402	-0.011188	1.2	0.20074	0.29385	0.34773	0.1373	0.15218	0.40746	0.36706	0.091847	0.12863	0.76795
30.80808081	0.13006	0.090657	0.021455	0.16043	0.1112	0.16512	0.00086287	0.008245	-0.012342	0.026753	0.069441	0.036096	0.019528	-0.015944	0.036896	-0.019199	0.040497	0.0075266	-0.038706	0.19275	0.051391	0.478	0.16321	0.38043	0.16669	0.43574	0.50482	0.12084	0.34232	0.10523	0.053591	0.18719	0.05916	0.05366	0.47061	0.59611	0.67498	-0.044997	1.0759	0.23842	0.26131	0.29118	0.17909	0.16838	0.39571	0.33146	0.052124	0.075106	0.79995
30.88023088	0.14041	0.078035	0.044769	0.13638	0.066913	0.13911	0.0039355	0.019034	0.00090275	0.017272	0.046777	0.039013	0.037615	-0.020462	0.040855	-0.021422	-0.00019818	0.017643	-0.040868	0.15414	0.05436	0.43325	0.1353	0.37945	0.17799	0.43064	0.4857	0.14063	0.30175	0.15175	0.091094	0.19086	0.065843	0.08351	0.42512	0.55783	0.67727	-0.088259	0.9666	0.26587	0.25615	0.22879	0.19018	0.14688	0.3715	0.33091	0.046198	0.044253	0.71608
30.95238095	0.1288	0.048157	0.055389	0.10432	0.031724	0.10792	0.0024044	0.032428	0.00054035	0.017117	0.038337	0.036641	0.068809	-0.0057984	0.040025	0.0049983	-0.043088	0.02086	-0.029277	0.16997	0.067982	0.37561	0.087445	0.34774	0.1738	0.40248	0.46364	0.15852	0.24698	0.20278	0.10983	0.18385	0.083045	0.11974	0.4157	0.50664	0.81007	-0.099266	0.9284	0.28115	0.29507	0.22426	0.19021	0.11201	0.36591	0.34159	0.020597	0.076483	0.70669
31.02453102	0.11324	0.012899	0.045271	0.085694	-0.0059158	0.074674	0.0094652	0.04152	0.013001	0.013581	0.017915	0.036632	0.12821	0.011153	0.0494	0.028926	-0.058125	0.047583	-0.010462	0.22599	0.11248	0.3295	0.057659	0.31846	0.17771	0.42083	0.48848	0.16282	0.22855	0.25411	0.087478	0.17849	0.08213	0.14971	0.40816	0.47365	1.0118	-0.093298	0.90105	0.32307	0.28789	0.24465	0.20004	0.084954	0.38858	0.37519	0.010093	0.12186	0.79937
31.0966811	0.11364	0.014071	0.037455	0.068167	-0.018116	0.028788	0.031886	0.027003	0.036116	0.0024909	0.017645	0.057815	0.16118	0.0079059	0.047573	0.018302	-0.035779	0.15421	0.022812	0.22825	0.14943	0.32716	0.059243	0.30008	0.22104	0.48868	0.50711	0.15181	0.21513	0.29488	0.04876	0.1602	0.066886	0.17628	0.37272	0.45646	1.163	-0.11421	0.84595	0.35002	0.24225	0.25885	0.1913	0.080612	0.34547	0.4	0.032639	0.088558	0.90186
31.16883117	0.1086	0.051148	0.053602	0.049291	-0.0055152	0.0046908	0.032793	0.027356	0.0384	-0.0096699	0.044719	0.0799	0.1445	-0.0040442	0.036462	-0.0079003	-0.044849	0.28125	0.0596	0.20927	0.11446	0.32616	0.070468	0.29279	0.29685	0.6286	0.48062	0.12258	0.18191	0.28851	0.010962	0.1423	0.04316	0.17551	0.33778	0.44964	1.2433	-0.1234	0.79449	0.34452	0.24111	0.24167	0.16371	0.065984	0.30014	0.38964	0.064538	0.020087	0.98998
31.24098124	0.076401	0.050795	0.060354	0.055231	0.016925	0.027578	0.030287	0.028796	-0.0001656	-0.026521	0.039461	0.069786	0.096271	0.0049416	0.021914	-0.03039	-0.059922	0.31267	0.099992	0.20443	0.081099	0.32449	0.079388	0.27466	0.35966	0.85555	0.4561	0.10989	0.1424	0.27197	-0.00080841	0.12841	0.030747	0.1567	0.32411	0.44416	1.3987	-0.10015	0.82749	0.33673	0.25945	0.19879	0.13932	0.052651	0.32497	0.38429	0.078854	0.028357	1.1384
31.31313131	0.077389	0.024685	0.04245	0.08175	0.033254	0.063995	0.042592	0.0070254	-0.047742	-0.056113	0.015818	0.045945	0.071603	0.040173	0.014649	-0.041583	-0.065645	0.29179	0.1185	0.20282	0.061871	0.36063	0.080874	0.27845	0.36992	1.0756	0.44939	0.13114	0.10299	0.25161	0.02387	0.096736	0.028723	0.13899	0.31693	0.45236	1.691	-0.072629	0.85128	0.37033	0.26286	0.18369	0.17151	0.075521	0.32562	0.37698	0.074529	0.10178	1.2728
31.38528139	0.12748	0.016548	0.015953	0.13364	0.031549	0.11745	0.041747	0.020547	-0.06496	-0.060879	0.019751	0.020893	0.07711	0.053778	0.006771	-0.029577	-0.074593	0.28179	0.11815	0.20495	0.044554	0.37774	0.098456	0.27921	0.36112	1.2084	0.42586	0.13987	0.084336	0.24463	0.053494	0.052694	0.035354	0.14138	0.28153	0.45312	1.9379	-0.078612	0.84182	0.44007	0.26042	0.17446	0.17907	0.098065	0.29741	0.4009	0.072045	0.15445	1.2353
31.45743146	0.16389	0.013754	0.0019053	0.16773	0.013575	0.15623	0.016599	0.063541	-0.042956	-0.053327	0.023927	0.009684	0.078085	0.056793	0.0024068	0.0031019	-0.055269	0.26791	0.12023	0.21011	0.043178	0.32398	0.097211	0.26573	0.36288	1.2176	0.41116	0.10949	0.075648	0.302	0.071636	0.036491	0.03488	0.14466	0.22678	0.43587	2.0371	-0.1084	0.87182	0.45158	0.26737	0.17406	0.17241	0.12581	0.28076	0.42245	0.051796	0.14297	1.1285
31.52958153	0.15302	0.021227	0.018715	0.15405	0.0082695	0.14394	-0.00013623	0.063039	-0.039436	-0.03419	0.022024	0.017158	0.074481	0.066308	0.0017151	0.030501	-0.038006	0.25926	0.10723	0.21492	0.064929	0.27232	0.058407	0.24212	0.34565	1.1875	0.40059	0.098204	0.057735	0.40274	0.074786	0.053225	0.01477	0.14242	0.19478	0.40302	2.1301	-0.10746	0.88761	0.42019	0.30812	0.2225	0.23453	0.13644	0.28154	0.43727	0.026028	0.14381	1.1077
31.6017316	0.11754	0.023113	0.063558	0.10268	0.014683	0.12966	-0.014416	0.039709	-0.039304	-0.011336	0.032193	0.022444	0.066846	0.063892	-0.010096	0.047874	-0.041757	0.23598	0.060835	0.20334	0.096875	0.23474	0.045696	0.21334	0.29493	1.2018	0.39398	0.097485	0.031145	0.45821	0.076218	0.079268	-0.023898	0.13248	0.17887	0.40451	2.1782	-0.083152	0.83686	0.43386	0.33016	0.29088	0.29562	0.11353	0.28544	0.44572	0.0092309	0.16664	1.1971
31.67388167	0.1478	0.037281	0.071868	0.065254	-0.0039375	0.12525	-0.024578	0.024546	-0.018319	-0.0052494	0.042722	0.0076475	0.048831	0.061387	-0.035498	0.043521	-0.034084	0.20332	0.022603	0.20083	0.11215	0.21311	0.070521	0.18121	0.26301	1.2041	0.36039	0.093269	0.010353	0.46842	0.086976	0.094219	-0.054491	0.11846	0.15209	0.43242	2.1229	-0.08898	0.76642	0.40975	0.31394	0.32282	0.31641	0.11065	0.31173	0.44104	0.011835	0.18588	1.2779
31.74603175	0.22807	0.047352	0.052923	0.054804	-0.0343	0.13636	-0.013822	0.0070713	-0.032213	-0.028854	0.049538	-0.0020851	0.016172	0.081238	-0.051183	0.010797	-0.039376	0.20288	0.027304	0.22637	0.072942	0.2168	0.10321	0.15601	0.25936	1.1678	0.31928	0.088061	0.014441	0.48399	0.088503	0.10688	-0.070374	0.096948	0.13883	0.48883	2.0675	-0.083148	0.74373	0.36417	0.34698	0.31743	0.2639	0.16562	0.38759	0.42031	0.013581	0.1877	1.2709
31.81818182	0.24975	0.030899	0.057384	0.060926	-0.039038	0.16527	0.0039177	-0.011862	-0.069665	-0.037454	0.037563	0.0050598	-0.0032429	0.091112	-0.040894	-0.022536	-0.042743	0.22298	0.066807	0.26266	0.014457	0.22338	0.11109	0.13046	0.24655	1.0953	0.29474	0.064346	0.012742	0.47811	0.076257	0.11167	-0.082813	0.074065	0.12978	0.54756	2.1416	-0.087045	0.74678	0.34517	0.38369	0.26312	0.17846	0.24256	0.48114	0.40367	0.0045484	0.18604	1.2301
31.89033189	0.23316	0.018289	0.073295	0.03874	-0.012752	0.20504	-0.0065493	-0.027958	-0.068669	-0.016069	0.0097118	0.027826	0.027109	0.078623	-0.028558	-0.043786	-0.037873	0.23479	0.11632	0.2639	-0.0028218	0.2176	0.082831	0.10989	0.23574	1.0399	0.27822	0.057745	-0.018143	0.45152	0.064706	0.11849	-0.077048	0.053304	0.11325	0.58162	2.2251	-0.10274	0.70309	0.32987	0.35187	0.23657	0.1689	0.26819	0.53268	0.4011	0.04142	0.16592	1.2202
31.96248196	0.22617	0.034415	0.10781	0.0059668	0.0090245	0.2305	-0.013918	-0.016824	-0.028354	0.0059847	-0.010966	0.051162	0.04354	0.067905	-0.021118	-0.053837	-0.028615	0.21247	0.16119	0.25234	-0.0053161	0.193	0.06017	0.10211	0.24364	0.97815	0.2384	0.054751	-0.062737	0.40908	0.058371	0.14132	-0.028985	0.035494	0.090965	0.5872	2.1398	-0.096491	0.63466	0.31063	0.27666	0.25324	0.19406	0.2403	0.52986	0.41385	0.047261	0.15933	1.177
32.03463203	0.19665	0.097132	0.14483	-0.020156	0.0066613	0.23106	0.0061761	-0.0073682	-0.0055323	0.0015206	-0.029909	0.051963	0.024736	0.060579	-0.014327	-0.059097	-0.0091776	0.19168	0.16261	0.2482	-0.025567	0.17942	0.042183	0.096948	0.23792	0.91719	0.20902	0.055756	-0.093665	0.38434	0.048744	0.16513	-0.018373	0.03114	0.065389	0.55077	1.9949	-0.081995	0.60568	0.25435	0.2365	0.29393	0.25162	0.2323	0.51179	0.408	0.023858	0.18291	1.192
32.10678211	0.18419	0.12482	0.11095	-0.024091	-0.00031073	0.19445	0.019462	-0.011793	-0.0091897	-0.025557	-0.029431	0.036394	0.0098122	0.066462	-0.0050624	-0.042902	0.018348	0.20806	0.14281	0.25273	-0.040922	0.20773	0.04335	0.064988	0.21502	0.90829	0.22885	0.078291	-0.11902	0.4371	0.052137	0.18433	-0.054577	0.02655	0.056756	0.50754	1.9593	-0.089208	0.62826	0.2041	0.27458	0.33183	0.30136	0.25101	0.49297	0.39262	0.021059	0.19329	1.2353
32.17893218	0.20276	0.11628	0.068971	-0.019877	0.0063173	0.14541	0.021631	-0.011712	-0.0042309	-0.015906	-0.02664	0.034379	0.016245	0.073994	-0.0068403	-0.028291	0.060882	0.20751	0.15542	0.27976	-0.01329	0.21896	0.055476	0.034546	0.19616	0.88809	0.26613	0.10839	-0.14182	0.50443	0.053925	0.20497	-0.038752	0.0036758	0.05777	0.47819	1.9684	-0.10865	0.628	0.19946	0.28859	0.33592	0.33261	0.25179	0.48255	0.42286	0.064596	0.17824	1.257
32.25108225	0.21356	0.10259	0.073469	-0.022473	0.018706	0.12904	0.0054785	-0.011598	0.0009901	0.012488	-0.024382	0.021567	0.013886	0.067605	-0.02505	-0.021144	0.10481	0.19272	0.14622	0.29619	0.047521	0.21187	0.051489	0.02431	0.17547	0.85414	0.2986	0.13505	-0.13382	0.51526	0.0544	0.21131	0.0010033	-0.031171	0.060626	0.47349	1.8879	-0.12241	0.55862	0.19209	0.25203	0.31429	0.31734	0.24509	0.47798	0.51593	0.073542	0.14727	1.2211
32.32323232	0.20198	0.072404	0.10435	-0.012874	0.018802	0.14501	-0.01228	-0.013854	0.010495	0.017187	-0.016121	0.021766	-0.0012412	0.049929	-0.028817	-0.037915	0.11176	0.19365	0.1295	0.2779	0.16647	0.19954	0.062392	0.026751	0.1421	0.84471	0.31764	0.1588	-0.094111	0.5037	0.059721	0.2085	0.018052	-0.041254	0.04294	0.45732	1.7962	-0.12444	0.49754	0.14784	0.2277	0.26207	0.35367	0.23988	0.50319	0.55133	0.042283	0.14644	1.2281
32.3953824	0.1842	0.068579	0.094979	0.015502	0.0074612	0.15315	-0.0051902	-0.017098	0.013453	0.022915	-0.0044202	0.021702	-0.00040797	0.03511	0.0052773	-0.056837	0.085798	0.19353	0.11515	0.23511	0.33177	0.2141	0.07836	0.023234	0.10617	0.79479	0.30973	0.17845	-0.038935	0.50774	0.053303	0.19677	0.044583	-0.02292	0.015333	0.41821	1.7558	-0.14248	0.49967	0.13281	0.24963	0.23792	0.42565	0.19916	0.51696	0.44635	0.017522	0.14229	1.2568
32.46753247	0.16869	0.088006	0.036753	0.053466	0.018217	0.12545	0.0055844	-0.025349	0.027958	0.050278	0.012148	0.03175	-0.0018653	0.042572	0.039067	-0.052949	0.057549	0.20088	0.10658	0.18854	0.53253	0.23963	0.091917	0.047601	0.10447	0.74773	0.29185	0.19726	0.026833	0.50205	0.038994	0.18034	0.10928	-0.021015	-0.0095365	0.37802	1.7144	-0.15362	0.49901	0.15575	0.24591	0.23706	0.43409	0.16816	0.49865	0.35294	0.005581	0.14009	1.2384
32.53968254	0.1775	0.097083	0.028299	0.044678	0.037834	0.10529	-0.00043569	-0.037918	0.03098	0.066675	0.038329	0.029508	-0.012534	0.059793	0.043429	-0.050021	0.046608	0.21927	0.088624	0.17625	0.67354	0.25617	0.098608	0.087623	0.13368	0.73971	0.28248	0.19884	0.12824	0.46478	0.048488	0.20046	0.24354	-0.036836	-0.011566	0.38616	1.6259	-0.11304	0.45339	0.15693	0.228	0.22627	0.38639	0.16263	0.49151	0.34514	0.013578	0.12242	1.1843
32.61183261	0.19395	0.085353	0.063977	0.021274	0.086277	0.12294	-0.0234	-0.056716	0.03201	0.031782	0.051268	0.017864	-0.0067988	0.056595	0.026912	-0.063525	0.02871	0.20718	0.055987	0.18508	0.66427	0.27686	0.075493	0.12429	0.16027	0.71053	0.27355	0.17228	0.24733	0.42786	0.085077	0.23845	0.36272	-0.046634	-0.0039082	0.4341	1.5377	-0.069299	0.39512	0.13721	0.23735	0.21084	0.31974	0.14269	0.53302	0.39491	0.031579	0.11186	1.1448
32.68398268	0.16476	0.074164	0.060526	0.013199	0.10267	0.14841	-0.037166	-0.054409	0.02295	-0.017188	0.052359	0.045674	-0.00080986	0.056564	0.022974	-0.055472	-0.0083453	0.16695	0.014036	0.21304	0.62693	0.28181	0.042134	0.14571	0.18172	0.66111	0.24249	0.13104	0.27779	0.4117	0.11184	0.24238	0.44588	-0.041843	-0.0067762	0.48443	1.4827	-0.048908	0.36758	0.12535	0.24636	0.21969	0.30277	0.13399	0.57857	0.388	0.05496	0.13562	1.1442
32.75613276	0.1263	0.047776	0.05066	0.0040468	0.049833	0.15748	-0.025984	-0.04054	-0.0087344	-0.016087	0.065136	0.080186	-0.0048108	0.075878	0.012581	-0.030027	-0.031957	0.11504	-0.019523	0.23808	0.63948	0.26018	0.039192	0.14334	0.20421	0.58532	0.19897	0.11323	0.22694	0.39147	0.12444	0.22008	0.49652	-0.034477	-0.020533	0.51621	1.4277	-0.016324	0.34793	0.11525	0.22593	0.21126	0.38673	0.11634	0.57418	0.34177	0.059226	0.11984	1.0995
32.82828283	0.13146	0.038697	0.056961	-0.012714	0.033143	0.14754	-0.012016	-0.039678	-0.026669	0.025273	0.079589	0.082726	0.0044047	0.10105	0.0013071	-0.011339	-0.010555	0.077172	-0.029352	0.2362	0.6526	0.19497	0.051342	0.16405	0.21796	0.53524	0.18421	0.10838	0.21501	0.37416	0.13152	0.19428	0.53719	-0.020061	-0.029718	0.54158	1.3489	0.038495	0.31287	0.09019	0.18278	0.20497	0.42281	0.096449	0.58626	0.30789	0.063742	0.10797	1.0778
32.9004329	0.13765	0.048489	0.066682	-0.021824	0.05173	0.12011	0.0032669	-0.029162	-0.037376	0.023953	0.069213	0.087627	0.0033129	0.098306	0.0094676	0.0047216	0.042087	0.074823	-0.020606	0.22709	0.63767	0.15199	0.070719	0.23009	0.20143	0.51626	0.18488	0.099119	0.22994	0.34222	0.1124	0.18352	0.60385	0.015516	-0.026246	0.54675	1.2511	0.084262	0.30616	0.069634	0.19635	0.21935	0.41529	0.085331	0.61792	0.26041	0.079366	0.10032	1.0714
32.97258297	0.12004	0.036397	0.072824	0.028161	0.064476	0.077665	0.01233	0.0011224	-0.022625	-0.00014468	0.051299	0.1041	0.0066549	0.083142	0.025147	0.0088982	0.068057	0.049689	-0.014121	0.23711	0.60694	0.14784	0.060745	0.28301	0.18458	0.48852	0.19063	0.097419	0.18743	0.33436	0.068709	0.17101	0.6752	0.036449	-0.0040843	0.52127	1.1853	0.12768	0.39766	0.055574	0.22067	0.22593	0.47993	0.071958	0.61369	0.27095	0.09432	0.093435	1.0515
33.04473304	0.099596	0.025609	0.054881	0.079152	0.085958	0.048564	0.0041121	0.012041	0.0057261	-0.018018	0.04463	0.10526	0.029547	0.11656	0.030111	0.02504	0.04833	0.013083	0.015231	0.23428	0.57731	0.14404	0.025363	0.30524	0.19976	0.47183	0.18558	0.074367	0.12296	0.3328	0.046655	0.20377	0.71932	0.019559	0.028195	0.48517	1.1767	0.1254	0.49519	0.055991	0.24543	0.21838	0.52382	0.080313	0.54451	0.27467	0.065224	0.094438	0.98589
33.11688312	0.095855	0.029724	0.049696	0.079787	0.10047	0.064434	0.0056766	-0.00034616	0.0011588	-0.038274	0.059101	0.069317	0.042299	0.19117	0.045554	0.02438	0.025188	0.0016521	0.054179	0.21155	0.52313	0.12873	0.022257	0.26781	0.22481	0.4728	0.17412	0.051927	0.11994	0.30664	0.053288	0.4114	0.80762	-0.0089109	0.037009	0.46038	1.156	0.11398	0.50502	0.053884	0.23852	0.23796	0.52688	0.10123	0.48805	0.24126	0.025493	0.1062	0.89748
33.18903319	0.10396	0.044419	0.09985	0.05928	0.087097	0.072145	0.0030844	-0.010406	0.0066699	-0.046918	0.064963	0.055807	0.044933	0.24763	0.056504	0.0074341	0.023364	-0.034556	0.033704	0.18644	0.498	0.11671	0.043603	0.22298	0.20844	0.48706	0.15834	0.038636	0.14415	0.29104	0.025803	0.79186	0.97982	-0.0063036	0.044149	0.4353	1.1107	0.1241	0.50554	0.027588	0.28494	0.23772	0.57732	0.069276	0.50238	0.19575	0.021966	0.1242	0.91938
33.26118326	0.12607	0.048702	0.1406	0.03659	0.079768	0.066479	-0.023269	-0.028165	0.031528	-0.051466	0.05524	0.060955	0.04092	0.27734	0.062846	0.0015755	0.00077421	-0.043792	0.030905	0.15572	0.46885	0.12981	0.073271	0.22222	0.18564	0.49858	0.15323	0.039126	0.17508	0.26372	-0.0021524	1.1154	1.0892	0.054122	0.046503	0.4135	1.0579	0.11874	0.537	0.0093218	0.39277	0.18592	0.6297	0.055341	0.54849	0.18625	0.02765	0.14083	0.98747
33.33333333	0.17692	0.0063471	0.15404	0.048643	0.082226	0.091985	-0.044851	-0.036151	0.037387	-0.062142	0.045663	0.064307	0.017823	0.30698	0.079368	0.0081452	-0.011646	0.011856	0.094613	0.12834	0.42007	0.1458	0.098476	0.24028	0.17305	0.49598	0.16537	0.071591	0.22489	0.22243	-0.0092488	1.2544	1.0917	0.1428	0.039185	0.40348	1.0048	0.099818	0.55678	0.0026635	0.41776	0.13636	0.59749	0.051245	0.53646	0.25527	0.033025	0.13949	0.97204
33.40548341	0.25133	-0.0076381	0.14275	0.086883	0.090649	0.11709	-0.051144	-0.01789	0.01235	-0.061429	0.014098	0.045019	0.013864	0.33493	0.075427	0.0070563	-0.01465	0.054496	0.14169	0.11941	0.38072	0.13132	0.088883	0.26213	0.13947	0.50994	0.16408	0.13522	0.24729	0.19825	-0.0050503	1.2915	1.0683	0.21726	0.052022	0.42598	0.91987	0.073385	0.5231	0.0024083	0.38264	0.1425	0.53551	0.079085	0.4825	0.32844	0.06874	0.11385	0.90323
33.47763348	0.30258	0.014332	0.11185	0.091893	0.079084	0.13509	-0.044658	0.0012423	0.0032513	-0.031172	-0.0092356	0.020892	0.035726	0.36651	0.084773	0.005332	-0.011407	0.067814	0.13575	0.078175	0.36725	0.11597	0.072498	0.29889	0.09279	0.5356	0.15264	0.19423	0.24588	0.17542	-0.0080055	1.3103	1.0682	0.29084	0.062176	0.50369	0.85586	0.093146	0.48793	-0.0013064	0.3939	0.18826	0.4853	0.12086	0.47313	0.3459	0.10486	0.15887	0.93388
33.54978355	0.32451	0.010392	0.086649	0.081689	0.061555	0.14007	-0.032153	0.021305	0.0050625	-0.0012366	0.0017494	0.009629	0.052561	0.38937	0.097064	0.010103	0.01265	0.068021	0.14274	0.036543	0.35126	0.096104	0.093828	0.3593	0.076227	0.54909	0.16277	0.25076	0.21307	0.16466	-0.0019093	1.2927	1.0995	0.40421	0.044918	0.56019	0.94417	0.12553	0.48795	0.011918	0.41688	0.23622	0.46398	0.1372	0.45691	0.36581	0.11045	0.25896	0.95606
33.62193362	0.32683	-0.0033174	0.060092	0.0732	0.053421	0.11121	-0.021906	0.015298	-0.0052646	-0.013655	-0.0054591	0.0040931	0.058407	0.41161	0.083229	0.018575	0.056327	0.044995	0.17367	0.025507	0.30717	0.080461	0.10261	0.40706	0.089944	0.5283	0.16003	0.28816	0.19832	0.19374	0.03104	1.2885	1.1681	0.5637	0.030095	0.58992	1.1701	0.14179	0.49458	0.052092	0.37829	0.25002	0.51212	0.12086	0.4234	0.37443	0.11383	0.32719	0.89407
33.69408369	0.32557	-0.019987	0.055848	0.05619	0.032872	0.084193	-0.019651	0.0046585	-0.0034481	-0.015289	-0.011496	0.0046813	0.06091	0.47836	0.072636	0.036905	0.10725	0.011296	0.20515	0.017228	0.27322	0.090208	0.084684	0.42656	0.11605	0.51217	0.12178	0.3172	0.2317	0.19302	0.065345	1.3262	1.2121	0.67458	0.043057	0.66571	1.2872	0.15873	0.50085	0.12159	0.33639	0.22908	0.53811	0.080507	0.4028	0.34783	0.099616	0.3548	0.89236
33.76623377	0.3653	-0.016497	0.076076	0.051942	0.0043076	0.054856	-0.01688	-0.009194	0.0011704	-0.0050606	0.0040653	0.0056262	0.069621	0.59652	0.07214	0.031497	0.0964	0.024413	0.23724	0.013989	0.25677	0.081508	0.086945	0.4292	0.15599	0.47856	0.075495	0.34191	0.28564	0.17322	0.082728	1.3475	1.192	0.74583	0.058405	0.75284	1.277	0.1863	0.49332	0.19257	0.30984	0.21211	0.50314	0.048363	0.38901	0.31602	0.11434	0.33958	0.88612
33.83838384	0.4086	-0.0068294	0.10839	0.065912	-0.0073556	0.0096057	-0.0055995	-0.0066969	0.013297	-0.014543	0.0024176	0.012411	0.077914	0.69406	0.083489	0.014571	0.039134	0.063338	0.33399	0.015983	0.25142	0.072358	0.11977	0.40844	0.23006	0.45208	0.064684	0.33938	0.29038	0.16088	0.09753	1.3131	1.1685	0.86886	0.056279	0.78905	1.3071	0.28147	0.46922	0.24982	0.30595	0.20722	0.45153	0.01581	0.36931	0.25801	0.12659	0.35014	0.83601
33.91053391	0.38105	-0.005794	0.1286	0.081626	0.010949	-0.01681	-0.023647	0.015968	0.014985	-0.041735	-0.038605	0.013181	0.061754	0.73306	0.089037	0.036281	0.006334	0.046201	0.45573	0.028847	0.24276	0.069094	0.15402	0.38082	0.30617	0.43687	0.083927	0.32435	0.27971	0.16223	0.11651	1.2914	1.1797	1.1042	0.03664	0.85086	1.3671	0.44175	0.43582	0.29325	0.29399	0.22124	0.40841	0.0016283	0.40939	0.22459	0.1195	0.39144	0.82147
33.98268398	0.35458	-0.009859	0.13024	0.14685	0.01126	-0.042196	-0.031542	0.017557	0.0078819	-0.037492	-0.062704	0.016647	0.040381	0.76736	0.07669	0.064681	-0.0037837	0.02721	0.5493	0.067797	0.21884	0.06324	0.22729	0.35868	0.35163	0.41419	0.12879	0.32179	0.27355	0.17048	0.11465	1.2966	1.2209	1.3759	0.011906	1.0261	1.3685	0.56218	0.40377	0.30529	0.32706	0.23366	0.39924	0.012031	0.46073	0.24681	0.10581	0.39009	0.80105
34.05483405	0.33859	-0.041397	0.13925	0.27098	0.0026043	-0.064343	-0.0075361	-0.018426	0.034229	-0.02536	-0.041575	0.021934	0.043541	0.84423	0.050664	0.07509	0.0225	0.05304	0.5967	0.099548	0.1963	0.070102	0.33003	0.3464	0.39069	0.41595	0.18361	0.35664	0.26723	0.16991	0.1063	1.345	1.3862	1.5199	-0.0082404	1.2044	1.2992	0.59493	0.34543	0.29234	0.41886	0.22756	0.4378	0.035137	0.4781	0.2478	0.079264	0.37296	0.75414
34.12698413	0.29354	-0.072488	0.14953	0.39686	-0.0058923	-0.06873	0.01333	-0.017981	0.045902	-0.027864	-0.014445	0.013254	0.067852	0.89024	0.037909	0.06414	0.094521	0.096886	0.59991	0.1026	0.19438	0.085302	0.38049	0.32632	0.41574	0.41502	0.21414	0.37973	0.25035	0.18185	0.12172	1.3307	1.5542	1.5665	-0.014371	1.2709	1.2304	0.58678	0.30294	0.29181	0.48247	0.22425	0.40761	0.032182	0.48993	0.24518	0.059529	0.38848	0.77434
34.1991342	0.25064	-0.049739	0.14515	0.44282	-0.012681	-0.032751	0.0015521	0.013008	0.036251	-0.024871	-0.0088748	-0.01903	0.07393	0.8822	0.065078	0.038393	0.17814	0.12186	0.58893	0.081129	0.19605	0.079653	0.41327	0.3103	0.40947	0.40164	0.23131	0.37467	0.23278	0.20112	0.13733	1.2261	1.5744	1.5602	-0.0097646	1.2618	1.2136	0.565	0.308	0.29785	0.49017	0.23926	0.37169	0.055054	0.49086	0.254	0.014382	0.40241	0.81051
34.27128427	0.26714	-0.017483	0.15604	0.42385	-0.0060985	0.022463	-0.030187	0.039991	0.029927	-0.0073665	-0.0013713	-0.041124	0.061129	0.83302	0.083111	0.019859	0.2228	0.10522	0.5486	0.064291	0.18326	0.082971	0.46759	0.28319	0.3573	0.38932	0.24764	0.37268	0.2244	0.22261	0.14313	1.1464	1.5047	1.5158	-0.020784	1.2607	1.2124	0.53865	0.31784	0.26274	0.46456	0.22622	0.40821	0.12497	0.54394	0.28084	-0.0027603	0.41998	0.82301
34.34343434	0.30197	-0.015074	0.16937	0.42551	0.013787	0.049328	-0.048398	0.029702	0.012854	0.024305	0.01006	-0.037949	0.061573	0.78191	0.084734	0.026297	0.23159	0.079254	0.50511	0.079251	0.15529	0.12039	0.52354	0.25822	0.28901	0.37873	0.26111	0.36069	0.18249	0.22812	0.15229	1.1331	1.4139	1.5838	-0.041329	1.3178	1.204	0.50465	0.28273	0.22846	0.45301	0.18169	0.39476	0.17865	0.65499	0.27486	-0.0039569	0.42605	0.84465
34.41558442	0.28698	-0.028367	0.15559	0.44245	0.032145	0.051261	-0.035618	0.0063912	0.0063949	0.038547	-0.0083296	-0.026472	0.073374	0.73445	0.078787	0.03168	0.21445	0.077356	0.49319	0.088888	0.13065	0.13689	0.56064	0.26492	0.23339	0.37011	0.26679	0.35023	0.1429	0.20647	0.14	1.1067	1.3642	1.7861	-0.045981	1.3759	1.213	0.49143	0.31006	0.21417	0.51944	0.17241	0.32163	0.1905	0.74445	0.24949	-0.0091357	0.35252	0.79741
34.48773449	0.27778	-0.020932	0.14678	0.47001	0.050103	0.036125	-0.0069505	0.0077159	0.012722	0.027823	-0.031491	-0.0011573	0.086581	0.65827	0.074626	0.00065651	0.19434	0.074288	0.50513	0.074506	0.097495	0.13649	0.54888	0.29117	0.21944	0.37174	0.26329	0.34497	0.13987	0.17466	0.11788	1.0411	1.3027	1.9018	-0.037766	1.4212	1.3138	0.46041	0.40274	0.18842	0.57973	0.17837	0.30819	0.18758	0.80228	0.23279	-0.0082964	0.29051	0.74164
34.55988456	0.26103	0.0065536	0.14706	0.5645	0.068715	0.017775	0.004866	0.00034271	0.0087721	0.01066	-0.027516	0.0062126	0.10136	0.57436	0.081958	-0.021906	0.19302	0.093832	0.53701	0.042584	0.099681	0.136	0.50652	0.32703	0.23037	0.34045	0.26075	0.31342	0.14746	0.16861	0.1131	1.0038	1.22	1.8851	-0.04467	1.4675	1.5518	0.40181	0.4873	0.16114	0.60332	0.15568	0.33043	0.17123	0.87035	0.24531	0.043379	0.28092	0.71637
34.63203463	0.25409	0.0024953	0.15095	0.74978	0.072046	0.010762	-0.014784	-0.0042118	0.011061	0.01008	-0.022259	-0.012411	0.10119	0.51267	0.09061	-0.017465	0.2035	0.11542	0.54176	0.0158	0.10482	0.11624	0.45591	0.30897	0.23653	0.29847	0.26009	0.29801	0.1335	0.2055	0.10201	1.003	1.2035	1.8473	-0.069981	1.5566	1.9012	0.34379	0.51336	0.12258	0.64148	0.14889	0.33318	0.12461	0.94523	0.25314	0.10547	0.30483	0.68796
34.7041847	0.25866	-0.015478	0.16955	0.90389	0.069652	0.0077857	-0.038468	-0.0013339	0.013164	0.016065	-0.015772	-0.014392	0.10506	0.48098	0.096405	-0.012884	0.18372	0.13479	0.56935	0.023494	0.086532	0.09195	0.40251	0.25133	0.2211	0.30118	0.24359	0.27885	0.11734	0.24374	0.073325	1.0248	1.1267	1.8638	-0.083101	1.6182	2.3022	0.29394	0.50773	0.08857	0.63621	0.17825	0.29463	0.10018	1.011	0.23338	0.1031	0.33157	0.70265
34.77633478	0.26533	-0.02339	0.1629	0.9549	0.062981	0.013303	-0.043367	0.01904	0.00091203	0.0089726	-0.019187	-0.0067302	0.11676	0.44813	0.086405	-0.024454	0.18263	0.15175	0.58378	0.047652	0.076119	0.070559	0.34105	0.21639	0.20495	0.30931	0.21673	0.24434	0.13626	0.2608	0.06004	1.0018	0.99715	1.9931	-0.078133	1.5991	2.6896	0.25429	0.49992	0.064425	0.60206	0.24408	0.22147	0.11815	0.97461	0.22259	0.084172	0.35934	0.6777
34.84848485	0.28015	-0.045314	0.12145	0.9158	0.066472	0.039227	-0.05279	0.022256	-0.015865	0.0013692	-0.055475	-0.019249	0.10815	0.39543	0.06353	-0.04659	0.19409	0.13431	0.56734	0.048017	0.076087	0.057944	0.30226	0.19927	0.19791	0.30417	0.21382	0.21003	0.18906	0.27183	0.068494	0.93044	0.93769	2.1956	-0.073428	1.56	2.9636	0.24069	0.48364	0.068401	0.55661	0.25645	0.18434	0.15219	0.88285	0.21678	0.080608	0.39838	0.61138
34.92063492	0.2871	-0.061588	0.10522	0.87778	0.051868	0.045758	-0.064708	-4.29E-05	-0.017139	0.01336	-0.060068	-0.016455	0.055859	0.36452	0.043788	-0.046896	0.21364	0.069676	0.50613	0.024316	0.083607	0.057991	0.30821	0.16536	0.19658	0.30581	0.21543	0.20155	0.21173	0.30583	0.065713	0.86903	0.89229	2.275	-0.071281	1.5113	3.154	0.21906	0.50063	0.069416	0.53392	0.18822	0.17946	0.19161	0.86928	0.22672	0.06084	0.43695	0.62278
34.99278499	0.28889	-0.06428	0.1176	0.88624	0.036766	0.052665	-0.038081	-0.005541	-0.014794	0.005266	-0.029238	-0.010847	0.015691	0.34312	0.043059	-0.014239	0.2141	0.018873	0.44392	-0.0077458	0.11	0.062565	0.33171	0.14943	0.21797	0.28486	0.20834	0.20898	0.22156	0.3672	0.022999	0.86599	0.80643	2.2829	-0.071953	1.401	3.3627	0.17763	0.52203	0.051885	0.51756	0.15182	0.15797	0.19891	0.89709	0.22721	0.068482	0.43333	0.65096
35.06493506	0.29378	-0.055717	0.13968	0.86662	0.054714	0.073206	-0.012448	-0.0022564	0.00311	-0.00024654	-0.0010608	-0.023375	-0.0070897	0.30087	0.020089	0.0089621	0.18399	0.02938	0.45596	-0.017129	0.1203	0.07392	0.38861	0.16495	0.24168	0.26611	0.2229	0.20053	0.23138	0.40332	0.0025208	0.87305	0.69533	2.2741	-0.085181	1.2967	3.5339	0.1681	0.48664	0.033709	0.54129	0.17711	0.14978	0.16063	0.91045	0.2515	0.11578	0.39295	0.66137
35.13708514	0.2804	-0.027455	0.16692	0.84763	0.049697	0.080037	-0.020042	0.0036149	0.030349	0.018643	0.02286	-0.026822	0.0029622	0.27513	0.0014277	0.031607	0.16056	0.056726	0.51509	-0.0084571	0.09202	0.10176	0.47993	0.18983	0.24213	0.28339	0.24597	0.20649	0.21886	0.38445	0.034731	0.82753	0.59771	2.1852	-0.097685	1.2618	3.6304	0.15216	0.46831	0.022523	0.66899	0.18324	0.17239	0.13841	0.93205	0.2732	0.14317	0.36826	0.68931
35.20923521	0.25658	-0.011881	0.15383	0.85927	0.021246	0.071401	-0.015678	0.0014108	0.05968	0.029147	0.021908	-0.027958	0.031871	0.26228	0.0087438	0.065271	0.15588	0.058626	0.52862	-0.0010384	0.062525	0.12221	0.53203	0.21371	0.22135	0.32444	0.25269	0.21916	0.20631	0.36309	0.049667	0.78347	0.54199	2.0409	-0.096127	1.2731	3.6269	0.14557	0.48397	0.052576	0.85046	0.14664	0.1746	0.14663	0.96814	0.27098	0.13159	0.34572	0.67735
35.28138528	0.2515	-0.0038199	0.13433	0.8477	0.0065054	0.063225	-0.00014186	0.0041131	0.082665	0.027495	0.015186	-0.01952	0.049792	0.24401	-0.0023607	0.098016	0.15178	0.064766	0.50151	1.43E-05	0.064501	0.13493	0.53932	0.24261	0.19168	0.34209	0.23178	0.22168	0.21575	0.3561	0.023244	0.73621	0.54772	1.9659	-0.093411	1.2533	3.5224	0.13898	0.5027	0.10025	0.97725	0.11669	0.14658	0.13252	0.95664	0.25817	0.14066	0.30615	0.5963
35.35353535	0.26943	0.013242	0.1428	0.82821	0.0089928	0.05402	0.011498	0.017274	0.068815	0.029721	0.00071014	-0.011256	0.042133	0.21704	-0.0010738	0.094956	0.12413	0.065214	0.47447	-0.008454	0.069368	0.14892	0.53193	0.23344	0.14992	0.31562	0.21236	0.21093	0.2362	0.32305	-0.0133	0.69819	0.52532	1.9605	-0.086063	1.2073	3.3922	0.14908	0.49386	0.12666	1.0454	0.12293	0.085595	0.11727	0.89132	0.279	0.13864	0.30889	0.54069
35.42568543	0.29236	0.038855	0.14261	0.81225	0.018398	0.063467	0.043481	0.018143	0.048261	0.042586	-0.0091692	-0.016778	0.034369	0.19277	0.0037209	0.08652	0.097997	0.056733	0.4517	-0.0078332	0.038315	0.1659	0.52254	0.23949	0.11439	0.27685	0.19936	0.18617	0.26859	0.28239	-0.024759	0.72762	0.45294	1.9334	-0.06263	1.1747	3.2566	0.20257	0.45461	0.1405	1.0499	0.11452	0.070869	0.12915	0.79725	0.29564	0.10269	0.35087	0.50159
35.4978355	0.29043	0.047888	0.10338	0.84767	0.019754	0.083323	0.046141	0.018889	0.026386	0.061855	-0.0023003	-0.033579	0.034162	0.17967	0.0096454	0.11186	0.088601	0.054691	0.41688	-0.02189	-0.010057	0.18529	0.52216	0.24681	0.1249	0.2489	0.20207	0.16269	0.27265	0.26858	0.000667	0.73363	0.38869	1.9122	-0.024881	1.1096	3.1494	0.28097	0.43796	0.13752	1.0645	0.077802	0.12001	0.11388	0.73289	0.27972	0.068474	0.40174	0.49956
35.56998557	0.26013	0.03022	0.065392	1.0006	0.026897	0.098811	0.01748	0.019577	0.0090451	0.068529	0.0052674	-0.0038692	0.019781	0.16064	0.010768	0.15369	0.081255	0.020892	0.3504	-0.029316	-0.022516	0.19236	0.51887	0.25231	0.16844	0.22809	0.20422	0.15334	0.24775	0.25505	0.031113	0.69291	0.34528	1.9048	0.063408	1.015	3.1041	0.3317	0.43562	0.11417	1.0642	0.062919	0.1562	0.075124	0.69328	0.26851	0.079395	0.46052	0.51977
35.64213564	0.23563	0.034918	0.043829	1.2069	0.045525	0.093656	0.033579	0.012356	-0.007283	0.054783	0.019137	0.043499	0.011033	0.14763	0.0004859	0.16445	0.091947	-0.0081584	0.28268	-0.038677	-0.017571	0.18977	0.49855	0.22249	0.18121	0.22308	0.19408	0.13185	0.2208	0.22813	0.039274	0.67069	0.31986	1.8986	0.18838	0.97069	3.0682	0.36861	0.40945	0.087566	1.0079	0.10128	0.11117	0.037258	0.71366	0.24405	0.07484	0.51859	0.55842
35.71428571	0.24483	0.062426	0.058457	1.2972	0.038096	0.071054	0.069826	-0.014797	0.013721	0.057601	0.032092	0.057423	0.03591	0.14231	0.0052103	0.13723	0.097005	0.021274	0.27654	-0.056258	-0.036378	0.17854	0.47025	0.17141	0.17633	0.19898	0.16256	0.10866	0.19216	0.20412	0.033026	0.67473	0.30677	1.8724	0.27924	0.96105	3.0242	0.37028	0.3764	0.069656	0.91278	0.13621	0.094961	0.00020155	0.74134	0.23542	0.06807	0.64462	0.55879
35.78643579	0.23458	0.06446	0.077082	1.3096	0.036392	0.063637	0.055276	-0.033804	0.045666	0.060627	0.028076	0.038599	0.041998	0.1256	0.02757	0.087455	0.069234	0.03179	0.30917	-0.042272	-0.02776	0.156	0.43813	0.12731	0.17055	0.16222	0.13319	0.0984	0.1626	0.20122	0.020434	0.67396	0.29071	1.8224	0.31684	0.94486	2.9083	0.36548	0.35445	0.056301	0.89729	0.11348	0.14337	0.015372	0.71805	0.23115	0.071232	0.79441	0.4906
35.85858586	0.23113	0.050397	0.082649	1.291	0.045971	0.041689	0.025837	-0.01198	0.079395	0.051709	0.026169	0.016412	0.020293	0.10917	0.042469	0.066011	0.031133	0.018517	0.32843	-0.014711	-0.028975	0.13003	0.39663	0.1094	0.1622	0.13059	0.10959	0.082342	0.14925	0.20929	0.039472	0.66779	0.29979	1.7877	0.34512	0.8795	2.7703	0.40446	0.32986	0.030094	0.88221	0.03845	0.20285	0.026058	0.69952	0.2289	0.054271	0.88029	0.45083
35.93073593	0.24112	0.045823	0.069562	1.2465	0.036621	0.011232	-0.0015244	0.02147	0.060494	0.04788	0.038333	0.023371	0.01644	0.098571	0.040637	0.083227	0.011321	0.041005	0.34807	-0.0084586	-0.029495	0.105	0.34559	0.12484	0.14401	0.093428	0.097706	0.067258	0.15152	0.21059	0.079395	0.62712	0.31845	1.7567	0.36053	0.81315	2.6673	0.41697	0.28903	0.031626	0.85866	-0.024404	0.23542	0.014906	0.70982	0.20698	0.043188	0.89817	0.48164
36.002886	0.25558	0.019016	0.06439	1.2292	0.027612	0.0020925	-0.01118	0.053143	-0.0031443	0.046513	0.030908	0.050095	0.028951	0.074936	0.017885	0.10042	0.0015084	0.055615	0.34304	-0.031228	-0.010729	0.082064	0.30649	0.15674	0.12126	0.071913	0.095437	0.057988	0.14722	0.20747	0.090161	0.58174	0.31926	1.662	0.40667	0.76499	2.6142	0.38109	0.2624	0.05528	0.89843	-0.022457	0.24211	0.013501	0.74303	0.17407	0.048287	0.86161	0.54835
36.07503608	0.26207	-0.0056647	0.10611	1.1837	0.038563	0.018014	0.010175	0.052016	-0.024559	0.039905	0.0018395	0.056706	0.041568	0.060681	-0.018858	0.10739	0.0053904	0.066723	0.32419	-0.024014	-0.012003	0.070822	0.26824	0.18803	0.10183	0.078934	0.087786	0.058918	0.10698	0.19868	0.081084	0.54821	0.2883	1.5545	0.53602	0.69774	2.5263	0.35242	0.26004	0.041239	0.95363	-0.01581	0.30125	-0.0077767	0.75809	0.15642	0.080568	0.83801	0.51275
36.14718615	0.2483	-0.014561	0.16187	1.1048	0.044107	0.022897	0.034792	0.032286	-0.018471	0.04616	-0.0025151	0.027339	0.049989	0.056673	-0.031953	0.11723	0.016425	0.090724	0.3233	0.13097	-0.031123	0.066876	0.20866	0.19857	0.087489	0.090572	0.083768	0.082569	0.059339	0.19944	0.072906	0.50588	0.23116	1.4753	0.71561	0.6375	2.3724	0.34501	0.25894	0.0016497	0.99038	-0.030414	0.33787	-0.042661	0.74177	0.1988	0.10498	0.85939	0.48924
36.21933622	0.21158	-0.027618	0.18728	1.0342	0.04708	0.0011065	0.031663	0.037392	-0.021553	0.044555	0.0039272	0.011259	0.055755	0.063195	-0.01298	0.12163	0.051277	0.10116	0.34671	0.4803	-0.033904	0.073249	0.16418	0.18914	0.10412	0.11065	0.082413	0.081382	0.047234	0.21466	0.05845	0.46062	0.17529	1.4157	0.92051	0.58848	2.3037	0.36001	0.26302	-0.018403	0.9274	-0.042944	0.33017	-0.043038	0.72365	0.22884	0.10668	0.85771	0.49211
36.29148629	0.16061	-0.034759	0.19667	1.0051	0.046561	0.019491	0.024058	0.035315	-0.017059	0.045891	0.0030733	0.002169	0.049187	0.086925	-0.0027306	0.11435	0.088486	0.11004	0.322	0.81354	-0.0097383	0.072785	0.13027	0.18831	0.15896	0.1425	0.088374	0.068111	0.074196	0.20261	0.026465	0.43655	0.12974	1.3457	1.0703	0.55446	2.3483	0.35213	0.26293	-0.011511	0.81282	-0.010416	0.31714	-0.012603	0.66866	0.16597	0.079752	0.79508	0.43857
36.36363636	0.13141	-0.051233	0.19485	0.97238	0.028723	0.054122	0.04344	0.030745	-0.0041308	0.055028	0.0092262	-0.0097045	0.054646	0.10656	-0.0080235	0.098955	0.094075	0.11012	0.2744	0.96135	0.029134	0.048065	0.12091	0.21772	0.22182	0.16409	0.080079	0.071925	0.11635	0.17577	0.014646	0.43609	0.12015	1.26	1.1394	0.53059	2.2769	0.3173	0.25917	-0.01312	0.74473	0.021747	0.29283	0.032152	0.63469	0.099641	0.10343	0.76615	0.38306
36.43578644	0.11878	-0.061015	0.18118	0.87738	0.019152	0.052973	0.086208	0.047775	-0.017902	0.047322	0.0036234	-0.020102	0.087118	0.15201	-0.010047	0.062826	0.068228	0.059934	0.24714	1.003	0.08145	0.04183	0.14996	0.25293	0.29489	0.17487	0.079062	0.067353	0.13985	0.18473	0.022056	0.4082	0.14451	1.2201	1.156	0.5171	2.1013	0.27943	0.23805	-0.0403	0.67708	0.01095	0.29439	0.053964	0.67156	0.070594	0.12521	0.77739	0.39
36.50793651	0.12591	-0.045657	0.1635	0.81242	0.019892	0.04536	0.08281	0.064503	-0.020768	0.033764	0.0088613	-0.0075817	0.10743	0.20243	-0.027326	0.034476	0.040505	0.010292	0.21016	1.0087	0.070672	0.05968	0.15817	0.26187	0.3614	0.15827	0.057098	0.053359	0.10453	0.22527	0.016955	0.36188	0.13292	1.2569	1.136	0.48768	2.0483	0.23671	0.20133	-0.026888	0.58726	0.016473	0.33491	0.057101	0.71183	0.08927	0.11075	0.79759	0.47024
36.58008658	0.15144	-0.011677	0.16793	0.80283	0.0014439	0.041274	0.051325	0.083085	-0.027351	0.028935	0.010625	0.0039669	0.088985	0.20998	-0.051765	0.022816	0.029658	0.011155	0.17437	0.97095	0.052276	0.10817	0.13861	0.26192	0.40143	0.1689	0.03912	0.059159	0.067518	0.23862	0.0020431	0.3281	0.14668	1.2905	1.055	0.48318	2.0327	0.21763	0.17911	-0.01118	0.53085	0.043457	0.35316	0.054106	0.68555	0.10735	0.092181	0.78883	0.52446
36.65223665	0.15205	0.010716	0.16302	0.80855	-0.0082709	0.020651	0.031318	0.078849	-0.025795	0.029065	-0.0088533	0.00057339	0.025894	0.19272	-0.071446	0.021875	0.028817	0.058373	0.2045	0.95809	0.054289	0.1663	0.11532	0.26953	0.42017	0.21717	0.04078	0.11462	0.056754	0.21122	-0.0056138	0.2815	0.2206	1.2695	0.93726	0.5301	1.9561	0.20655	0.15864	-0.028638	0.52828	0.030523	0.36048	0.044954	0.66192	0.090255	0.10336	0.72475	0.51248
36.72438672	0.14722	0.024289	0.13131	0.81212	-0.020505	0.028673	0.023441	0.065975	0.0098865	0.032807	-0.025025	-0.002368	-0.0082337	0.1757	-0.094874	0.023037	0.014993	0.10519	0.27026	0.99321	0.072633	0.20511	0.10588	0.27381	0.42831	0.26522	0.053861	0.18715	0.060231	0.15646	0.0078315	0.26472	0.31229	1.2506	0.89251	0.66432	1.8931	0.19877	0.12976	-0.042121	0.55031	0.006229	0.34767	0.06176	0.67695	0.087642	0.099157	0.74068	0.44867
36.7965368	0.14397	0.0413	0.082798	0.78738	-0.04369	0.058927	0.039456	0.07384	0.0044171	0.0024328	-0.028516	0.024046	-0.0060324	0.16598	-0.094292	0.021464	0.004319	0.10465	0.28372	1.0702	0.10577	0.20042	0.078386	0.29238	0.42691	0.28585	0.068033	0.22856	0.046092	0.094636	0.021243	0.31022	0.40456	1.2557	0.99836	0.86717	1.8403	0.21181	0.14534	-0.015683	0.55167	-3.66E-05	0.32875	0.074965	0.68458	0.13686	0.098288	0.817	0.4074
36.86868687	0.1376	0.04605	0.072173	0.74203	-0.032576	0.070768	0.063749	0.090849	-0.033543	-0.019131	-0.010814	0.042092	-0.013357	0.16623	-0.069547	0.010309	-0.019288	0.07451	0.2752	1.1126	0.12858	0.18276	0.053811	0.29569	0.39408	0.29587	0.080641	0.2532	0.017876	0.081065	0.0011591	0.36488	0.46487	1.2789	1.285	1.0463	1.7822	0.23294	0.19114	0.02468	0.55831	-0.0026974	0.32733	0.067848	0.67291	0.18942	0.13447	0.81086	0.43746
36.94083694	0.12147	0.033649	0.064867	0.69437	0.011554	0.026767	0.081461	0.093215	-0.03301	0.0024306	0.029407	0.010031	-0.00028631	0.15987	-0.064731	0.0098398	-0.044918	0.084851	0.26711	1.0597	0.14043	0.16317	0.052681	0.24502	0.3594	0.30032	0.094721	0.27278	-0.0081092	0.088876	-0.048688	0.40914	0.49229	1.317	1.6051	1.1555	1.7222	0.25519	0.21822	0.040235	0.55728	-0.030735	0.34769	0.030262	0.71269	0.1889	0.14422	0.80274	0.50021
37.01298701	0.11941	0.025532	0.032643	0.66571	0.044004	-0.005655	0.076597	0.074564	-0.008991	0.014873	0.055807	-0.00020311	0.033176	0.13351	-0.054353	0.022748	-0.032704	0.099724	0.22456	0.98792	0.13702	0.16625	0.065001	0.22441	0.32307	0.29778	0.11503	0.25375	-0.013996	0.073937	-0.056465	0.42164	0.49552	1.3453	1.8327	1.1875	1.6675	0.30447	0.23799	0.038259	0.51217	-0.048133	0.38483	-0.027237	0.82281	0.15934	0.11426	0.79535	0.52828
37.08513709	0.11133	0.016487	0.011532	0.64858	0.016033	0.015997	0.051815	0.068509	-0.0025024	0.012945	0.048901	0.036636	0.088319	0.12647	-0.037711	0.037692	-0.042531	0.090711	0.17833	0.96126	0.11369	0.21223	0.10133	0.27881	0.27659	0.28133	0.13634	0.18348	0.0053519	0.060958	0.0011102	0.38938	0.48603	1.3241	1.9027	1.1992	1.6052	0.34955	0.25796	0.03847	0.47674	0.0049413	0.37171	-0.043982	0.8993	0.12255	0.096396	0.76562	0.54925
37.15728716	0.1024	0.012121	0.035276	0.6261	-0.020188	0.018238	0.033832	0.079016	0.010845	0.028468	0.029097	0.057788	0.15858	0.12713	-0.019787	0.047447	-0.045158	0.098644	0.14781	0.93595	0.083519	0.25277	0.11115	0.33572	0.25423	0.2676	0.16437	0.16125	0.031782	0.052968	0.033041	0.35304	0.46062	1.2414	1.8789	1.1906	1.5375	0.36034	0.29179	0.021814	0.43739	0.12514	0.26546	-0.02049	0.87263	0.12532	0.12023	0.72988	0.54448
37.22943723	0.11078	0.026693	0.051485	0.61485	-0.01076	-0.0033728	0.040028	0.066484	0.027121	0.033008	0.021236	0.040999	0.21192	0.12847	-0.0076999	0.053249	0.050445	0.10777	0.17446	0.91454	0.053631	0.27835	0.10214	0.36797	0.24679	0.25413	0.21297	0.17692	0.060102	0.065405	0.031915	0.33557	0.45188	1.154	1.8422	1.1748	1.4643	0.42117	0.32846	-0.0024807	0.40644	0.22804	0.18566	-0.032343	0.82827	0.13555	0.11564	0.71192	0.49486
37.3015873	0.12192	0.058641	0.05007	0.60524	0.0092504	0.0027683	0.06911	0.041728	0.018252	0.035193	0.032112	0.039198	0.22318	0.11233	0.010163	0.05596	0.22328	0.094806	0.22409	0.87087	0.053825	0.2593	0.074728	0.34559	0.23948	0.27541	0.25273	0.1787	0.094446	0.092578	0.0045941	0.37636	0.54653	1.1132	1.7895	1.1293	1.3975	0.56091	0.3282	-0.018184	0.40038	0.29837	0.22496	-0.047182	0.8516	0.1156	0.1058	0.71888	0.4322
37.37373737	0.13847	0.078424	0.075389	0.55105	0.012879	0.035846	0.065393	0.049769	0.0079512	0.036542	0.044959	0.053991	0.21402	0.093506	0.016272	0.048652	0.38945	0.062831	0.20286	0.81576	0.10351	0.23579	0.059614	0.27521	0.25651	0.32658	0.27634	0.14905	0.10189	0.085608	-0.00034958	0.42829	0.65054	1.0906	1.7357	1.0258	1.356	0.68752	0.32891	-0.023941	0.36513	0.34433	0.30261	-0.034503	0.84813	0.096749	0.10493	0.69118	0.40017
37.44588745	0.129	0.13227	0.089155	0.48709	0.012392	0.03465	0.041593	0.068873	0.0032956	0.015458	0.049186	0.044414	0.21771	0.088471	0.0085621	0.028579	0.49056	0.029164	0.13508	0.78269	0.15312	0.24228	0.079885	0.21956	0.29282	0.32049	0.26102	0.11556	0.065103	0.088657	-0.0034703	0.48202	0.70396	1.0424	1.6598	0.9587	1.2899	0.72613	0.30846	-0.012862	0.32011	0.34413	0.30456	-0.030093	0.78986	0.045483	0.080537	0.63551	0.41012
37.51803752	0.11971	0.29722	0.10708	0.427	0.030766	0.0090814	0.017782	0.071202	-0.0049286	0.013839	0.030794	0.044393	0.23465	0.072671	0.0058152	0.0083179	0.50504	0.017615	0.121	0.74411	0.16712	0.26416	0.10975	0.16423	0.30307	0.28652	0.25094	0.11858	0.030988	0.10521	-0.02914	0.54505	0.76437	0.96281	1.5625	0.92493	1.1852	0.71945	0.26666	0.0015999	0.31058	0.31825	0.23813	-0.023043	0.73604	0.023646	0.078678	0.66574	0.40449
37.59018759	0.12391	0.60593	0.13797	0.38973	0.045058	0.017908	0.01398	0.070139	0.0011006	0.032481	-0.0021685	0.033374	0.1984	0.05205	0.013537	0.0048759	0.44359	0.018192	0.1428	0.6855	0.15332	0.27909	0.13262	0.11405	0.2812	0.27418	0.27712	0.12176	0.037406	0.11226	-0.034689	0.53604	0.83633	0.93172	1.5113	0.89343	1.1491	0.73307	0.25139	0.044176	0.30589	0.31444	0.18911	0.047021	0.71675	0.062164	0.10034	0.73681	0.43533
37.66233766	0.10122	0.92641	0.23826	0.37143	0.026546	0.025471	0.022723	0.074519	0.031528	0.031489	-0.016662	0.0059022	0.13361	0.034876	0.03311	-0.0088269	0.35689	0.032772	0.13861	0.65572	0.14908	0.26955	0.15691	0.090749	0.26249	0.2754	0.28209	0.10732	0.080858	0.11641	-0.021911	0.48467	0.97739	0.94316	1.4474	0.86148	1.1475	0.71875	0.26857	0.067248	0.26355	0.34551	0.18458	0.083829	0.67427	0.091549	0.10797	0.70064	0.43917
37.73448773	0.099587	1.1218	0.45481	0.35684	-0.0043334	0.022236	0.017946	0.061543	0.037283	0.031964	-0.0047009	-0.02616	0.094325	0.02245	0.041544	-0.018795	0.34143	0.072888	0.10945	0.65915	0.14553	0.23893	0.17925	0.090763	0.23726	0.25843	0.26728	0.10759	0.084881	0.097263	-0.0081691	0.4763	1.1493	0.91083	1.3303	0.79952	1.1119	0.65217	0.2827	0.078153	0.24726	0.36914	0.1201	0.054834	0.57294	0.088127	0.077016	0.62346	0.41849
37.80663781	0.16749	1.1977	0.69474	0.34538	-0.020523	0.01869	0.013727	0.058273	0.035434	0.051501	-0.013756	-0.055692	0.068839	0.011566	0.042656	-0.028446	0.35881	0.12204	0.095115	0.65043	0.14218	0.19208	0.15321	0.069474	0.20134	0.22474	0.25694	0.10367	0.05701	0.090676	-0.0081816	0.50579	1.2761	0.85513	1.2744	0.73578	1.0452	0.60057	0.29113	0.077527	0.26143	0.35176	0.079873	0.072301	0.50747	0.092146	0.061993	0.65257	0.42189
37.87878788	0.28	1.2013	0.81688	0.37144	-0.045554	0.020143	0.021747	0.073951	0.022426	0.070063	-0.035118	-0.051941	0.029988	-0.014783	0.052381	-0.027707	0.33133	0.14206	0.10589	0.60076	0.13787	0.15497	0.094005	0.026609	0.20125	0.22803	0.24247	0.072124	0.033587	0.10806	-0.011644	0.51981	1.3283	0.8377	1.237	0.66928	1.0146	0.58175	0.32144	0.073061	0.26631	0.31059	0.13876	0.099907	0.48595	0.11316	0.067	0.70606	0.39318
37.95093795	0.33882	1.169	0.81587	0.41537	-0.050383	0.038492	0.032206	0.086406	0.027077	0.087185	-0.028815	-0.0076283	-0.0041047	-0.038128	0.053135	-0.016589	0.2832	0.13353	0.12763	0.56121	0.11384	0.15672	0.066687	-0.00070062	0.21791	0.28444	0.24178	0.042398	0.034456	0.11984	0.0040584	0.50694	1.3295	0.80967	1.1339	0.62752	1.0129	0.56333	0.35993	0.0616	0.28337	0.26459	0.18439	0.09399	0.43994	0.11765	0.055954	0.67319	0.33937
38.02308802	0.32087	1.1003	0.78053	0.45663	-0.031462	0.054106	0.038916	0.091293	0.048728	0.10833	-0.013538	0.03126	-0.019157	-0.02201	0.032928	-0.010958	0.26836	0.11951	0.16297	0.53227	0.077716	0.1551	0.088329	-0.0019316	0.19705	0.32746	0.25842	0.045946	0.045814	0.10109	0.021246	0.46479	1.2817	0.75525	1.0296	0.60266	0.95466	0.5008	0.45899	0.03365	0.31303	0.25674	0.19183	0.072049	0.41844	0.1002	0.043469	0.62078	0.30468
38.0952381	0.3097	1.0025	0.7434	0.48254	-0.042644	0.05363	0.015781	0.085995	0.01544	0.10004	-0.0077408	0.041816	-0.034381	-0.010243	0.0075551	-0.012717	0.23633	0.13025	0.18682	0.50477	0.063297	0.10996	0.11893	0.02563	0.16128	0.33032	0.27166	0.066031	0.042756	0.076396	0.007407	0.43875	1.2222	0.689	0.98383	0.56573	0.88954	0.43018	0.6353	0.0065389	0.36683	0.25506	0.21518	0.031934	0.419	0.091812	0.045825	0.59989	0.32089
38.16738817	0.3153	0.90367	0.729	0.45522	-0.054668	0.030129	-0.0046288	0.071164	-0.018785	0.079528	-0.0014836	0.037487	-0.035999	-0.032331	0.017243	-0.013187	0.19805	0.14203	0.18762	0.50865	0.047097	0.084929	0.1308	0.053764	0.15587	0.32715	0.28865	0.058794	0.053809	0.084087	-0.028301	0.40873	1.1263	0.62271	0.93619	0.52323	0.89644	0.37536	0.83619	-0.023076	0.42286	0.23004	0.21827	-0.0051871	0.39115	0.11587	0.014255	0.59218	0.38027
38.23953824	0.31376	0.85176	0.73543	0.42902	-0.044897	0.013914	0.0080008	0.041528	-0.013244	0.044774	0.012164	0.022764	-0.021971	-0.04664	0.038265	-0.015307	0.18437	0.13526	0.19281	0.5038	0.036646	0.10666	0.12871	0.070131	0.17512	0.34014	0.275	0.042575	0.099946	0.073854	-0.050923	0.36333	1.0097	0.59412	0.88495	0.46709	0.934	0.36943	0.9947	-0.041218	0.43876	0.22425	0.17688	-0.0057633	0.34705	0.129	-0.033538	0.57615	0.41935
38.31168831	0.3019	0.83978	0.71763	0.44719	-0.045186	0.045002	0.0023469	0.011091	0.0010392	0.011415	0.017945	0.0019774	-0.01006	-0.045912	0.064724	-0.014638	0.14983	0.115	0.19823	0.46687	0.046499	0.13014	0.19057	0.11084	0.20197	0.35104	0.24341	0.038265	0.13479	0.053019	-0.046836	0.31769	0.956	0.57345	0.82548	0.43246	0.92662	0.393	1.0437	-0.016639	0.40951	0.23496	0.16428	-0.012274	0.30435	0.10308	-0.06161	0.56803	0.37886
38.38383838	0.26883	0.83345	0.66951	0.47975	-0.033002	0.094638	-0.0035753	0.00103	-0.0040591	0.015426	0.0052249	-0.0098455	-0.0020467	-0.019616	0.073789	-0.012091	0.1203	0.078825	0.18125	0.39841	0.082084	0.14917	0.26539	0.13551	0.20727	0.37943	0.23463	0.04251	0.10555	0.042162	-0.033725	0.29049	0.91378	0.5097	0.75558	0.44474	0.91052	0.36772	1.0123	0.026713	0.39962	0.20544	0.20273	0.018076	0.2693	0.09423	-0.087667	0.59825	0.3071
38.45598846	0.24376	0.81723	0.61967	0.45253	0.0082549	0.084473	-0.001573	-0.0049745	0.0041381	0.015183	-0.01825	0.0047979	-0.00048853	0.031383	0.065401	-0.015539	0.12838	0.048952	0.10705	0.35081	0.091574	0.14694	0.27011	0.14013	0.18888	0.41975	0.25811	0.088217	0.071189	0.044409	-0.046757	0.3105	0.84362	0.44926	0.70422	0.46905	0.90163	0.31922	0.96177	0.066483	0.40876	0.1511	0.20167	0.083636	0.29574	0.089713	-0.12572	0.60488	0.2879
38.52813853	0.23466	0.77883	0.59944	0.37226	0.016906	0.049852	-0.017266	-0.0060547	0.021237	0.0077527	-0.013745	0.035656	-0.01053	0.052506	0.082321	-0.0070618	0.13069	0.038521	0.041597	0.33661	0.060868	0.14131	0.2654	0.14974	0.17788	0.4216	0.29218	0.15841	0.079562	0.038708	-0.069148	0.32747	0.75601	0.40822	0.68601	0.47291	0.89863	0.31246	0.92427	0.10556	0.39764	0.14844	0.16029	0.13401	0.29465	0.042072	-0.1451	0.5843	0.29925
38.6002886	0.2509	0.74036	0.57501	0.3139	-0.013912	0.058849	-0.011388	-0.010178	0.032637	0.0039715	-0.022233	0.04444	-0.030552	0.057784	0.112	-7.03E-05	0.10562	0.023858	0.037153	0.37416	0.03042	0.14158	0.3001	0.16694	0.19666	0.40615	0.30942	0.18577	0.095159	0.021664	-0.069182	0.32677	0.68342	0.37598	0.67761	0.45699	0.84044	0.31715	0.90488	0.11463	0.33265	0.18206	0.15363	0.13346	0.23693	0.033169	-0.14692	0.54705	0.30548
38.67243867	0.23958	0.71539	0.53895	0.31003	-0.03842	0.081943	-0.0017924	-0.011523	0.031802	-0.01777	-0.049183	0.035646	-0.027884	0.080623	0.10867	-0.021518	0.076503	0.017268	0.026996	0.40841	0.035403	0.13597	0.34664	0.18694	0.21187	0.41927	0.32644	0.18521	0.086929	0.014209	-0.068937	0.32032	0.63871	0.34735	0.66974	0.44235	0.78776	0.26701	0.84146	0.11977	0.28205	0.17674	0.17266	0.10536	0.21314	0.072139	-0.13729	0.54394	0.3049
38.74458874	0.19034	0.66581	0.51753	0.30316	-0.021436	0.10374	-0.010672	-0.024177	0.056141	-0.043172	-0.052198	0.019095	0.0048795	0.10631	0.067717	-0.041999	0.054838	0.042642	0.024286	0.37767	0.050089	0.12339	0.37874	0.19604	0.19006	0.40649	0.35394	0.22731	0.069277	0.030665	-0.069913	0.30258	0.54998	0.32935	0.6539	0.42106	0.80197	0.19807	0.76834	0.12991	0.28173	0.17958	0.16257	0.095245	0.19215	0.057595	-0.16928	0.56657	0.30804
38.81673882	0.16621	0.61959	0.50998	0.31479	0.024225	0.091844	-0.01441	-0.018559	0.085677	-0.042522	-0.025841	-0.017707	0.022599	0.10861	0.048388	-0.040763	0.089424	0.088737	0.029115	0.31874	0.050271	0.11132	0.38651	0.20279	0.1852	0.37227	0.38466	0.28179	0.074703	0.081095	-0.076211	0.33088	0.49912	0.31538	0.62251	0.39467	0.81458	0.18356	0.7672	0.12979	0.2882	0.23122	0.13411	0.11269	0.15318	0.033192	-0.214	0.53855	0.328
38.88888889	0.16504	0.56005	0.47914	0.33245	0.053819	0.062801	-0.01093	-0.022211	0.088612	-0.0088708	-0.0053945	-0.044459	0.021732	0.08619	0.045262	-0.047284	0.13944	0.11647	0.06333	0.28128	0.014446	0.1055	0.40244	0.26725	0.16709	0.3454	0.41032	0.28811	0.11495	0.10841	-0.056177	0.36574	0.49043	0.29026	0.61093	0.36889	0.7712	0.1775	0.77451	0.1233	0.26408	0.23108	0.15054	0.11712	0.14514	-0.0051706	-0.19532	0.51419	0.34206
38.96103896	0.15089	0.48727	0.49678	0.31496	0.04094	0.034699	-0.007828	-0.028971	0.069901	0.014499	0.0080835	-0.01429	0.02846	0.061908	0.041338	-0.051908	0.13413	0.13101	0.11486	0.2467	-0.017816	0.074994	0.3997	0.38567	0.15037	0.35966	0.42286	0.24361	0.12107	0.10657	-0.032684	0.36132	0.43503	0.26119	0.60436	0.32044	0.72194	0.13992	0.71611	0.10914	0.24741	0.16361	0.13877	0.094997	0.17484	-0.049331	-0.14533	0.51551	0.32566
39.03318903	0.15149	0.44277	0.53502	0.30905	0.0013604	0.037633	-0.0036914	0.0015022	0.063148	0.01794	0.0088193	0.011912	0.022265	0.064752	0.046364	-0.03261	0.074855	0.1696	0.14792	0.22868	-0.016353	0.040723	0.36074	0.44553	0.15327	0.41391	0.43009	0.21702	0.1043	0.14219	-0.031169	0.33653	0.36831	0.24633	0.64022	0.29383	0.70539	0.11262	0.68263	0.09382	0.26566	0.16695	0.098961	0.10152	0.19082	-0.059581	-0.13354	0.49085	0.33013
39.10533911	0.18358	0.43777	0.50863	0.3319	-0.0070054	0.046933	-0.0060132	0.036654	0.059756	0.0081789	0.002673	0.023193	0.018109	0.083781	0.040486	-0.0080316	0.068835	0.18734	0.15326	0.25027	-0.04212	0.049784	0.32078	0.44747	0.16339	0.44369	0.44039	0.22938	0.11016	0.1721	-0.042468	0.2925	0.33938	0.26201	0.70383	0.30928	0.68337	0.12173	0.66985	0.08802	0.25344	0.25078	0.097019	0.10208	0.15691	-0.063488	-0.16419	0.43705	0.37313
39.17748918	0.2063	0.4283	0.45877	0.39108	0.017375	0.019698	-0.0087298	0.028091	0.059474	-0.0096318	-0.00023581	0.020221	0.028523	0.13194	0.03229	-0.00039291	0.077481	0.15965	0.13697	0.25721	-0.079551	0.079799	0.31438	0.44366	0.18572	0.42353	0.43262	0.21375	0.12368	0.15313	-0.035369	0.24383	0.35811	0.25642	0.72783	0.35075	0.6495	0.15616	0.67356	0.067678	0.24092	0.29975	0.12433	0.068773	0.12083	-0.072369	-0.19174	0.40101	0.41729
39.24963925	0.18877	0.41339	0.4469	0.43217	0.03197	-0.0081595	-0.026583	-0.017865	0.058278	-0.016599	0.013895	0.027218	0.028548	0.17412	0.032317	0.0066825	0.054034	0.11885	0.12461	0.22769	-0.077375	0.094734	0.35104	0.43564	0.20533	0.40823	0.40701	0.16046	0.13635	0.11264	0.00070462	0.21042	0.359	0.2249	0.73465	0.41487	0.6128	0.15065	0.76687	0.029347	0.29955	0.31099	0.12173	0.009829	0.13916	-0.061857	-0.17966	0.41756	0.40522
39.32178932	0.14269	0.37496	0.44703	0.39844	0.042944	-0.022232	-0.036577	-0.031456	0.030098	-0.015587	0.018805	0.032278	0.034212	0.17479	0.024022	0.029274	0.038407	0.082288	0.13053	0.1893	-0.048235	0.10287	0.40443	0.44141	0.20964	0.43226	0.39246	0.1321	0.12836	0.094151	-0.0067348	0.20292	0.32881	0.20625	0.73235	0.45026	0.59141	0.15178	0.92779	-0.0074995	0.34863	0.31629	0.062853	-0.0099548	0.16908	-0.037514	-0.13878	0.42527	0.33947
39.39393939	0.1205	0.33827	0.39515	0.35701	0.036434	-0.0090951	-0.045712	-0.029516	0.022372	0.0023588	0.0039247	0.022501	0.063261	0.16785	0.0076902	0.043065	0.055766	0.094483	0.1649	0.19778	-0.010155	0.13576	0.4479	0.44882	0.19506	0.45908	0.3816	0.12438	0.082066	0.10936	-0.027497	0.20179	0.30106	0.2033	0.67903	0.43198	0.55844	0.18264	1.0396	-0.027245	0.25169	0.28546	0.03938	-0.022704	0.19899	-0.05293	-0.10581	0.40391	0.29647
39.46608947	0.14305	0.33406	0.36465	0.35022	0.012617	0.017114	-0.057934	-0.025923	0.035328	0.034535	0.025741	0.033545	0.081195	0.2047	0.018553	0.05085	0.088833	0.13005	0.18778	0.19202	0.0012992	0.17044	0.44195	0.45364	0.17853	0.53126	0.39357	0.11806	0.050061	0.11718	-0.015294	0.20283	0.25356	0.1844	0.59325	0.41079	0.50844	0.20777	1.0201	0.017947	0.16742	0.26898	0.06606	-0.069737	0.20519	-0.043905	-0.071905	0.38753	0.30871
39.53823954	0.15863	0.33664	0.37717	0.36713	0.0044391	0.016138	-0.039701	-0.019536	0.01322	0.04454	0.06395	0.05677	0.054784	0.2562	0.046665	0.043231	0.095036	0.13381	0.1923	0.18359	-0.0077777	0.17225	0.40033	0.47658	0.14502	0.63783	0.4264	0.097009	0.064746	0.10198	-0.0016737	0.20946	0.19058	0.15526	0.53412	0.39697	0.45985	0.24509	0.94589	0.089469	0.18998	0.28742	0.092853	-0.10154	0.22441	0.01242	-0.05205	0.37202	0.33768
39.61038961	0.17428	0.32997	0.34933	0.35484	0.0051679	0.015727	-0.014926	-0.023102	0.015932	0.012722	0.080495	0.058373	0.022397	0.27167	0.064448	0.030578	0.072532	0.10285	0.16027	0.20576	-0.0093525	0.1602	0.36339	0.47094	0.10432	0.70856	0.44047	0.05921	0.099113	0.068384	0.0021811	0.21983	0.15728	0.126	0.50663	0.37687	0.44333	0.27624	0.96342	0.13148	0.19313	0.27669	0.10584	-0.10933	0.24119	0.036788	-0.052538	0.33415	0.29467
39.68253968	0.1691	0.31405	0.29795	0.30598	0.027862	0.07606	0.0070929	-0.020737	0.044316	-0.0046537	0.061402	0.034273	0.0059708	0.25148	0.060363	0.026574	0.053267	0.087248	0.13567	0.19612	-0.0063829	0.13265	0.3323	0.4152	0.068232	0.69411	0.41276	0.079977	0.13133	0.061746	0.020702	0.20242	0.15151	0.10978	0.48226	0.3394	0.43347	0.29645	0.98396	0.10937	0.14055	0.25421	0.10193	-0.11192	0.24162	0.010462	-0.041714	0.31	0.23693
39.75468975	0.14966	0.27906	0.26685	0.27269	0.066783	0.1287	0.011565	-0.019097	0.032919	0.01513	0.026631	0.024447	0.02459	0.24126	0.040429	0.014925	0.046555	0.09723	0.14231	0.17043	-0.0081786	0.082601	0.27865	0.34574	0.031307	0.67184	0.36972	0.089478	0.12437	0.060453	0.016018	0.17655	0.15795	0.10433	0.4372	0.30902	0.37966	0.26472	0.9474	0.06657	0.12808	0.27558	0.089712	-0.1197	0.22784	-0.0065804	-0.025681	0.33755	0.2278
39.82683983	0.14071	0.22511	0.26146	0.26067	0.050238	0.14657	-0.0017543	-0.036805	0.019028	0.031602	0.0095109	0.037485	0.034366	0.2481	0.036392	0.0012691	0.044753	0.076448	0.13176	0.16807	-0.0086408	0.030522	0.2022	0.33033	0.012448	0.64672	0.32198	0.072461	0.10594	0.025088	-0.010301	0.18099	0.16037	0.098838	0.40365	0.28062	0.3202	0.2317	0.88923	0.065176	0.16884	0.25872	0.058908	-0.14372	0.23038	0.027738	-0.012397	0.33421	0.19073
39.8989899	0.15167	0.18257	0.26696	0.21987	0.016797	0.15549	-0.0097	-0.031121	0.038987	0.037305	-0.001728	0.023827	0.0024931	0.26327	0.044172	0.0049289	0.041233	0.03956	0.1193	0.16451	-0.020441	0.011044	0.14788	0.32625	0.042296	0.61319	0.30353	0.058889	0.090269	-0.012914	-0.026323	0.18764	0.17335	0.1121	0.39773	0.26024	0.30215	0.24739	0.8667	0.058213	0.19518	0.21103	0.073767	-0.15891	0.2657	0.063897	0.0095423	0.28838	0.11685
39.97113997	0.16903	0.17607	0.25431	0.17201	0.013554	0.16742	-0.0096238	-0.0045685	0.040362	0.029369	-0.0085432	0.0048639	-0.017651	0.27216	0.049854	0.007731	0.031984	0.020786	0.11268	0.13223	-0.016888	0.017402	0.12174	0.32144	0.080225	0.58852	0.29899	0.048483	0.040439	-0.00141	-0.022059	0.15966	0.19789	0.12312	0.38137	0.23099	0.30136	0.29537	0.83842	0.051233	0.16948	0.18374	0.088696	-0.13434	0.26888	0.072121	0.035548	0.3012	0.12955
40.04329004	0.17127	0.17882	0.22537	0.18585	0.044533	0.18549	-0.0040091	-0.0027371	0.02623	0.024907	-0.016255	-0.010018	-0.014199	0.26656	0.048925	0.0035871	0.021671	0.028084	0.098187	0.087474	0.026491	0.023324	0.096501	0.30315	0.096161	0.55833	0.28288	0.0037577	0.014135	0.044051	-0.013887	0.15494	0.17731	0.12138	0.33934	0.19751	0.2787	0.34196	0.77851	0.049059	0.17268	0.16534	0.045951	-0.088151	0.22951	0.053454	0.037049	0.35134	0.18973
40.11544012	0.17962	0.17104	0.19879	0.24644	0.076223	0.19188	-0.013928	0.0042783	0.0043073	-0.0024816	-0.034649	-0.03071	-0.012629	0.26955	0.071068	-0.013487	0.028783	0.070322	0.10047	0.073077	0.060355	0.040705	0.10613	0.26217	0.09713	0.50734	0.2429	-0.0024418	0.028952	0.084022	-0.0083076	0.16707	0.12158	0.10826	0.31387	0.2019	0.26154	0.34335	0.7055	0.031466	0.22437	0.20627	-0.0034513	-0.064116	0.22968	0.017472	0.03589	0.3569	0.21612
40.18759019	0.17139	0.14708	0.16649	0.24643	0.071674	0.20799	-0.045354	0.00017085	-0.00087241	-0.021105	-0.029686	-0.016171	-0.014753	0.27012	0.090754	-0.030091	0.036819	0.091452	0.11093	0.091903	0.069938	0.086763	0.16063	0.23805	0.094207	0.44516	0.20087	-0.012189	0.046341	0.11709	-0.012006	0.15488	0.06768	0.1029	0.30364	0.2251	0.25032	0.33606	0.67672	0.012481	0.24916	0.23554	0.016319	-0.051679	0.25125	-0.008332	0.041144	0.27967	0.2185
40.25974026	0.10325	0.12635	0.1425	0.24813	0.062114	0.23008	-0.068678	-0.023395	0.027828	-0.020647	-0.0037343	-0.0053696	-0.021933	0.26977	0.10215	-0.036339	0.057884	0.070691	0.082338	0.081291	0.073574	0.12698	0.18946	0.23137	0.084888	0.38757	0.15823	0.0065727	0.053659	0.15077	-0.018398	0.13925	0.0481	0.10731	0.27527	0.22957	0.2508	0.36424	0.66038	-0.0072937	0.2176	0.22765	0.023308	0.00033591	0.24535	-0.016629	0.058436	0.23372	0.23956
40.33189033	0.049669	0.13576	0.14135	0.28005	0.070932	0.2125	-0.046121	-0.028457	0.050846	-0.010672	-0.004613	-0.0026225	-0.016631	0.26951	0.10292	-0.032623	0.075201	0.063835	0.055069	0.068553	0.076643	0.13207	0.1597	0.23849	0.068914	0.34929	0.14159	0.019259	0.046125	0.18612	-0.018339	0.14735	0.028462	0.1111	0.24862	0.21879	0.26196	0.41415	0.59483	0.0038103	0.17562	0.25226	0.0061708	0.0559	0.24989	-0.012925	0.067412	0.25819	0.2666
40.4040404	0.056018	0.13151	0.13209	0.28979	0.078597	0.18909	0.00093252	-0.034293	0.039997	0.012863	-0.010387	-0.01731	-0.011726	0.26003	0.080223	-0.038621	0.09741	0.059636	0.052232	0.078261	0.051727	0.10463	0.1425	0.24912	0.028992	0.34452	0.13678	0.042156	0.036593	0.17909	-0.0029333	0.14138	0.030975	0.12936	0.33113	0.20767	0.27824	0.4517	0.51758	0.01279	0.14535	0.28779	0.024139	0.040629	0.28658	-0.00086265	0.051402	0.24374	0.27934
40.47619048	0.069243	0.10549	0.12186	0.24995	0.042229	0.17097	0.020799	-0.02985	0.017993	0.029759	-0.02421	-0.039647	0.0066035	0.23839	0.057407	-0.047178	0.12159	0.052841	0.046479	0.039708	-0.0061833	0.085714	0.13927	0.24321	-0.017457	0.34957	0.11202	0.048611	0.049647	0.14204	0.036576	0.11385	0.03735	0.1755	0.52079	0.18629	0.28707	0.48946	0.50837	0.024168	0.13245	0.27169	0.090626	-0.014138	0.3131	-0.028642	0.045262	0.22675	0.23056
40.54834055	0.081739	0.096074	0.10365	0.20744	0.013014	0.14645	0.034481	0.0092352	0.0012882	0.0018932	-0.038963	-0.046299	0.0362	0.23146	0.072542	-0.03941	0.11099	0.057561	0.06301	0.00020849	-0.01639	0.071943	0.14821	0.23169	-0.029388	0.35611	0.090918	0.05273	0.078529	0.10464	0.063775	0.092814	0.011829	0.23717	0.63798	0.14669	0.28607	0.5274	0.54966	0.071406	0.13024	0.25299	0.10946	-0.030156	0.31646	-0.070669	0.04484	0.22255	0.1471
40.62049062	0.091861	0.07312	0.11562	0.21526	0.0097405	0.11777	0.037741	0.040265	-0.0074784	-0.025138	-0.033288	-0.037924	0.035144	0.22501	0.092764	-0.035176	0.085208	0.066862	0.091067	0.0051621	0.026483	0.058477	0.16299	0.22812	0.0030963	0.35902	0.094349	0.075844	0.090951	0.091617	0.048213	0.097718	0.0024128	0.28796	0.72993	0.11705	0.26195	0.51062	0.56119	0.1287	0.10485	0.25208	0.069875	-0.015877	0.32817	-0.083715	0.026127	0.22759	0.10589
40.69264069	0.1094	0.024845	0.16293	0.2266	0.0067234	0.13491	0.041915	0.041151	-0.0066131	-0.022446	-0.01882	-0.012585	-0.005347	0.199	0.099404	-0.027918	0.092708	0.075501	0.077795	0.054043	0.050941	0.044356	0.17138	0.21444	0.063987	0.35845	0.11917	0.067839	0.087673	0.099599	-0.007741	0.11961	0.028802	0.29472	0.86567	0.11696	0.24903	0.45839	0.51466	0.13832	0.060688	0.24294	0.062227	-0.010974	0.35702	-0.087962	0.02654	0.22434	0.10993
40.76479076	0.12039	0.01954	0.17827	0.22348	0.0096809	0.16859	0.058148	0.03211	0.0073764	-0.0010525	-0.014917	0.013691	-0.032654	0.16607	0.10932	-0.024286	0.10467	0.061004	0.070276	0.090726	0.043997	0.016546	0.1487	0.20867	0.11227	0.36307	0.12304	0.053336	0.084153	0.10631	-0.044444	0.12548	0.013842	0.28667	1.0021	0.11151	0.25574	0.4037	0.48944	0.11359	0.059861	0.21285	0.10264	-0.020492	0.39399	-0.078887	0.053553	0.18803	0.13643
40.83694084	0.13881	0.055704	0.15895	0.21827	0.0033239	0.15229	0.063617	0.0070631	0.035483	0.02943	-0.0057359	0.032453	-0.029175	0.1334	0.11392	-0.025438	0.1276	0.048218	0.097351	0.1019	0.058986	0.0047099	0.12025	0.2143	0.12818	0.3728	0.10619	0.050486	0.082747	0.09776	-0.043187	0.1176	-0.019843	0.32019	1.1501	0.097941	0.29134	0.37655	0.49276	0.10807	0.091589	0.19231	0.13716	-0.027442	0.40367	-0.057853	0.066737	0.18808	0.16759
40.90909091	0.14111	0.075635	0.14618	0.23218	0.0071753	0.15177	0.050095	-0.019592	0.044312	0.036967	0.017253	0.042343	-0.045144	0.13345	0.087771	-0.032703	0.10995	0.066422	0.11047	0.14186	0.088083	0.014311	0.10511	0.23111	0.11775	0.36866	0.097631	0.050332	0.080795	0.089906	-0.018811	0.11593	-0.024955	0.35345	1.3165	0.091966	0.29062	0.34951	0.49373	0.13117	0.13161	0.17095	0.12021	0.0061543	0.36921	-0.029183	0.060032	0.24339	0.17326
40.98124098	0.11102	0.088608	0.14645	0.25209	0.012884	0.16193	0.051999	-0.01295	0.05193	0.034688	0.015516	0.023376	-0.078036	0.17178	0.074721	-0.062148	0.078797	0.06692	0.093772	0.15291	0.086207	0.024336	0.10779	0.24075	0.10827	0.35556	0.098334	0.079983	0.080066	0.10306	0.044126	0.098739	-0.0034335	0.34812	1.424	0.10172	0.26295	0.33275	0.50853	0.1382	0.18279	0.15006	0.055808	0.038858	0.38135	0.0060639	0.059577	0.31918	0.17107
41.05339105	0.094615	0.070401	0.14691	0.25536	-0.0086416	0.15388	0.048773	0.0078505	0.069979	0.047615	0.013541	-0.0067866	-0.099571	0.17852	0.072155	-0.050765	0.10617	0.049936	0.075318	0.10569	0.043836	0.034334	0.095641	0.22767	0.126	0.28816	0.069503	0.092028	0.092188	0.1306	0.18222	0.078197	-0.0046595	0.33208	1.4589	0.10279	0.26808	0.36344	0.53405	0.10604	0.20434	0.1173	0.031504	0.02677	0.43717	-0.0050821	0.030295	0.376	0.17417
41.12554113	0.13132	0.034894	0.13017	0.2235	-0.0079545	0.12753	0.027485	0.019098	0.064019	0.034906	-0.010194	0.010716	-0.10176	0.16952	0.064529	-0.015257	0.13919	0.05314	0.083913	0.074224	0.030215	0.032232	0.045754	0.21498	0.13765	0.22206	0.029068	0.083727	0.11717	0.12027	0.39221	0.068758	-0.029302	0.37141	1.4393	0.083427	0.2704	0.34547	0.53842	0.11215	0.17569	0.10331	0.058328	0.011534	0.47476	-0.033774	-0.014126	0.41185	0.16624
41.1976912	0.21402	0.018041	0.09661	0.19888	0.0079392	0.086202	0.01759	0.01608	0.054197	0.045542	-0.037281	0.06658	-0.09565	0.14444	0.046693	0.0079793	0.15167	0.060694	0.10094	0.076365	0.03887	0.019474	0.028483	0.19278	0.10924	0.21896	0.019776	0.083225	0.13352	0.088808	0.54751	0.076405	-0.014855	0.48906	1.4046	0.057453	0.25103	0.28195	0.48572	0.15151	0.16687	0.13279	0.06624	0.032381	0.5259	-0.05263	-0.023759	0.42587	0.16229
41.26984127	0.26642	0.0084712	0.095338	0.20921	0.0098698	0.067074	0.029126	0.00066367	0.066971	0.077783	-0.027359	0.081726	-0.077543	0.11376	0.015844	-0.0054607	0.15046	0.046561	0.092599	0.070411	0.055051	0.021897	0.061627	0.19208	0.088226	0.23926	0.016461	0.074257	0.11471	0.067335	0.605	0.080142	0.0047243	0.67074	1.3822	0.04801	0.23289	0.26637	0.43103	0.15369	0.24189	0.15718	0.065601	0.032366	0.6053	-0.048436	-0.032666	0.39264	0.15894
41.34199134	0.27074	-0.0059565	0.10174	0.20186	0.02148	0.061422	0.047575	-0.032543	0.078753	0.10197	0.0096337	0.063679	-0.061343	0.095348	-0.011639	-0.0019556	0.13415	0.026487	0.066058	0.065898	0.06327	0.055199	0.085181	0.19819	0.088529	0.23276	0.016365	0.076005	0.10755	0.055853	0.61753	0.076494	-0.016123	0.80394	1.3378	0.039502	0.21308	0.25949	0.43144	0.14072	0.30313	0.15274	0.071009	0.0029037	0.66389	-0.015653	-0.015479	0.33711	0.13131
41.41414141	0.22388	-0.025353	0.088923	0.14034	0.026271	0.066515	0.041002	-0.062464	0.07874	0.1075	0.021589	0.059575	-0.040862	0.078368	0.0022729	0.024155	0.13116	0.02617	0.048749	0.10741	0.050963	0.074099	0.10574	0.18097	0.077704	0.19028	0.031197	0.084486	0.131	0.043457	0.59735	0.10202	-0.013549	0.85964	1.2487	0.014313	0.20881	0.22352	0.42892	0.19099	0.28672	0.13398	0.017286	-0.046451	0.67248	-0.0019426	0.0054273	0.35631	0.09356
41.48629149	0.1605	-0.044273	0.075273	0.10036	0.047495	0.059339	0.024957	-0.066874	0.075808	0.11492	0.016064	0.066783	-0.042711	0.080875	0.018061	0.047688	0.13328	0.031979	0.047969	0.13805	0.029684	0.060643	0.11741	0.1682	0.071124	0.16695	0.033878	0.079148	0.14453	0.027429	0.55905	0.13865	0.035004	0.8515	1.1718	-0.0018132	0.22677	0.20759	0.39072	0.32007	0.21905	0.11517	-0.004123	-0.066049	0.65742	0.054776	-0.012607	0.35088	0.080682
41.55844156	0.16248	-0.061572	0.075104	0.097443	0.087755	0.0011215	0.035757	-0.062616	0.075021	0.10302	-0.012839	0.052364	-0.050558	0.09412	0.0071045	0.053026	0.11787	0.028162	0.067175	0.12855	0.019347	0.064342	0.11302	0.18033	0.093216	0.17376	0.028151	0.071633	0.12564	-0.0011202	0.52632	0.15113	0.11993	0.79879	1.1367	0.0051806	0.22407	0.19652	0.36581	0.41105	0.16077	0.10108	0.022914	-0.051984	0.62569	0.070182	-0.037481	0.30815	0.109
41.63059163	0.21411	-0.075157	0.0706	0.073617	0.084373	-0.01589	0.027313	-0.070649	0.037853	0.060616	-0.035316	0.03182	-0.055196	0.086583	0.021114	0.041458	0.11683	0.021509	0.047913	0.11683	0.012949	0.043698	0.091092	0.2157	0.12613	0.19311	0.041109	0.078608	0.07987	-0.010262	0.48129	0.15758	0.22044	0.74525	1.0856	8.44E-05	0.2336	0.17144	0.36708	0.40789	0.15005	0.086455	0.018964	-0.044684	0.61604	0.05561	-0.070493	0.31111	0.14464
41.7027417	0.26358	-0.052711	0.032556	0.051462	0.056828	0.037922	0.0048195	-0.066732	-0.01283	0.012724	-0.023256	0.025125	-0.080263	0.077229	0.047093	0.035441	0.12081	0.025028	0.026389	0.080898	0.0054514	0.0019246	0.05715	0.25595	0.15277	0.21907	0.045028	0.10531	0.069159	0.0091275	0.50324	0.15292	0.32754	0.69621	1.0169	0.025516	0.29097	0.14599	0.37584	0.40739	0.17318	0.078918	-0.028416	-0.062142	0.61638	0.089599	-0.084601	0.31342	0.15695
41.77489177	0.3216	-0.02044	0.030533	0.070733	0.039091	0.049937	0.0056241	-0.042687	-0.03585	-0.02284	0.0056591	0.021889	-0.10248	0.084003	0.063095	0.032181	0.10558	0.022185	0.046737	0.061634	0.00030771	-0.02504	0.015048	0.27553	0.16615	0.25199	0.038744	0.1187	0.093535	0.029051	0.57914	0.15145	0.43509	0.65935	0.9308	0.087955	0.33452	0.14869	0.35369	0.4612	0.1973	0.061487	-0.035455	-0.10479	0.57764	0.13251	-0.072864	0.28871	0.1919
41.84704185	0.35463	-0.0096788	0.035475	0.091585	0.033951	0.02814	0.025943	-0.015399	-0.025389	-0.039882	0.0051114	0.023924	-0.08185	0.0909	0.07103	0.022744	0.079748	0.01518	0.091194	0.10961	-0.01075	-0.01913	-0.0037163	0.30889	0.12321	0.2899	0.04278	0.12075	0.10184	0.051834	0.63535	0.15554	0.51182	0.63484	0.86064	0.13313	0.33498	0.20144	0.32081	0.49892	0.16243	0.058154	-0.023688	-0.11369	0.54315	0.13317	-0.079332	0.26468	0.24419
41.91919192	0.32011	-0.019261	0.037014	0.085121	0.040686	0.042516	0.049637	0.0073361	-0.033605	-0.054719	-0.0054743	0.02966	-0.02664	0.07658	0.072463	-0.0053515	0.074928	0.011223	0.091317	0.16445	-0.01421	-0.016548	-0.016595	0.33185	0.069678	0.34315	0.047712	0.13597	0.077869	0.050392	0.61636	0.16109	0.4941	0.58228	0.79531	0.18202	0.32361	0.257	0.31079	0.53155	0.13337	0.059339	-0.018954	-0.087131	0.51791	0.13639	-0.067316	0.22392	0.26015
41.99134199	0.26327	-0.024956	0.085033	0.064645	0.057674	0.036001	0.058506	0.010976	-0.063926	-0.061667	-0.017201	0.019334	0.011974	0.056765	0.06631	-0.015693	0.072044	0.011504	0.063615	0.17027	0.023278	-0.038601	-0.023035	0.33209	0.04972	0.41084	0.058613	0.13632	0.039254	0.037497	0.5643	0.18367	0.42392	0.55056	0.72398	0.22683	0.32278	0.3038	0.30496	0.60528	0.16882	0.022787	0.0095816	-0.058154	0.49555	0.15584	-0.026618	0.15863	0.25252
42.06349206	0.24935	0.0059713	0.21561	0.059618	0.062779	0.0057815	0.042732	0.011792	-0.066048	-0.052753	-0.017483	-0.0043601	0.0022185	0.04576	0.045779	0.003006	0.045853	0.021615	0.044691	0.18663	0.046727	-0.059541	-0.043458	0.30979	0.037771	0.47696	0.07415	0.10603	0.02339	0.024257	0.53118	0.20747	0.46081	0.56296	0.69502	0.23781	0.3143	0.35492	0.30345	0.66165	0.21179	0.017269	0.021404	0.0091077	0.55394	0.16825	-0.012783	0.12118	0.31127
42.13564214	0.2285	0.050403	0.46152	0.037976	0.071546	0.010275	0.03207	0.0095129	-0.057478	-0.051271	-0.010645	-0.031639	-0.019327	0.03229	0.012714	0.027286	0.022676	0.056816	0.062872	0.17965	0.047005	-0.056169	-0.057977	0.31224	0.028621	0.48002	0.083866	0.073805	0.015846	0.02293	0.53459	0.22341	0.52472	0.59763	0.7113	0.21856	0.27601	0.40343	0.28033	0.62957	0.20337	0.032425	0.015267	0.073951	0.65506	0.18141	-0.036337	0.126	0.34173
42.20779221	0.19684	0.068299	0.72901	0.019192	0.071046	0.037592	0.054066	0.0043353	-0.069941	-0.062295	0.007711	-0.023908	-0.031801	0.028667	0.0099932	0.025949	0.031847	0.10859	0.11047	0.14392	0.048778	-0.046022	-0.0433	0.32702	0.0279	0.45281	0.08186	0.037427	0.029888	0.037235	0.53661	0.25225	0.51068	0.62349	0.70251	0.1922	0.22746	0.45965	0.23451	0.54978	0.14352	0.020745	0.039337	0.063197	0.69544	0.19753	-0.037083	0.1141	0.34158
42.27994228	0.20957	0.052392	0.92717	0.040643	0.085102	0.067578	0.098583	0.015646	-0.08157	-0.073997	0.016905	0.014647	-0.039637	0.037385	0.04548	0.007107	0.049315	0.16997	0.15115	0.12072	0.045756	-0.052882	-0.031438	0.31843	0.053985	0.47714	0.081167	0.026103	0.10514	0.063774	0.52593	0.27012	0.46972	0.66485	0.68318	0.19905	0.25903	0.49421	0.21016	0.53147	0.12099	-0.0072499	0.094727	0.016347	0.6847	0.18274	0.00018329	0.091471	0.35614
42.35209235	0.26271	0.075516	1.0506	0.064705	0.11076	0.11087	0.11424	0.0090261	-0.064585	-0.060011	0.025152	0.035092	-0.035994	0.062006	0.06653	0.005589	0.063393	0.28874	0.18974	0.10994	0.031282	-0.058946	-0.0061632	0.30622	0.095522	0.5436	0.10224	0.048485	0.17127	0.077039	0.50865	0.25137	0.4766	0.70156	0.63496	0.21166	0.3365	0.4978	0.21103	0.55551	0.12328	-0.018083	0.13406	-0.0016277	0.66273	0.14247	0.0089766	0.082899	0.31694
42.42424242	0.26453	0.17914	1.151	0.071318	0.1	0.13044	0.10948	-0.016183	-0.03327	-0.029467	0.038488	0.018692	-0.019258	0.068931	0.063321	0.030113	0.082767	0.55906	0.26584	0.078731	0.025062	-0.047424	0.035079	0.29298	0.11703	0.54429	0.11337	0.058758	0.18211	0.058797	0.50312	0.23731	0.49151	0.69414	0.59101	0.19508	0.37281	0.49115	0.22966	0.54844	0.094407	0.0023697	0.14751	0.01	0.66294	0.10811	0.0045429	0.099761	0.24262
42.4963925	0.2244	0.42654	1.3687	0.044376	0.062851	0.12608	0.10884	-0.0020284	-0.015174	-0.022092	0.041677	0.032043	-0.013561	0.051377	0.030563	0.049493	0.083953	0.90659	0.35344	0.033245	0.029361	-0.035505	0.066637	0.30358	0.12201	0.53237	0.10941	0.059949	0.15649	0.029722	0.48034	0.24183	0.50988	0.63885	0.55508	0.18154	0.37781	0.48013	0.26858	0.54243	0.087373	0.014715	0.12985	0.036724	0.701	0.12441	0.0093665	0.10355	0.23307
42.56854257	0.20812	0.79829	1.5759	0.024979	0.018174	0.12226	0.13635	0.013564	-0.01933	-0.01906	0.047362	0.07367	-0.0061873	0.043591	0.014533	0.051869	0.05455	1.0848	0.40019	0.0059684	0.032478	-0.019287	0.085558	0.36303	0.11914	0.5543	0.11261	0.065416	0.14473	0.0058317	0.42701	0.24348	0.53331	0.60384	0.51176	0.17083	0.43335	0.45941	0.33107	0.53497	0.056444	0.0067609	0.06485	0.050499	0.73664	0.1224	0.024268	0.089902	0.29081
42.64069264	0.19009	1.1573	1.6397	0.010834	0.010873	0.10779	0.14979	0.015987	-0.026991	-0.0012952	0.065269	0.083801	-0.00060534	0.030577	0.026162	0.055789	0.023805	1.1161	0.39628	0.0048232	0.037088	-0.0074575	0.12104	0.44988	0.12324	0.56415	0.14037	0.073539	0.14016	0.0010036	0.41714	0.22858	0.61171	0.61544	0.47533	0.16834	0.54151	0.44099	0.38456	0.54128	0.0028149	0.0095214	0.0079513	0.017079	0.69128	0.10989	0.040258	0.057833	0.29861
42.71284271	0.15145	1.4255	1.6514	0.012328	0.012543	0.048861	0.12186	0.013907	-0.03791	0.0011855	0.10338	0.052675	0.019339	0.028475	0.035222	0.063688	-0.00040497	1.0835	0.3418	0.016824	-0.0011498	-0.018541	0.15945	0.49988	0.14108	0.54457	0.15109	0.088398	0.11815	0.016645	0.45559	0.19577	0.67503	0.63235	0.48511	0.16478	0.60154	0.44479	0.41692	0.54542	0.021259	0.028722	0.032465	-0.032983	0.63474	0.12391	0.054192	0.047537	0.24325
42.78499278	0.14343	1.5485	1.6763	0.01992	0.013064	0.028666	0.11399	-0.0054213	-0.026854	-0.0092763	0.098397	0.038062	0.054824	0.031371	0.027058	0.059947	-0.022588	1.0427	0.28172	0.052949	-0.063697	-0.030011	0.1441	0.56571	0.13972	0.52343	0.13483	0.086377	0.08515	0.031941	0.47687	0.16297	0.63243	0.60466	0.48617	0.16406	0.58312	0.43734	0.43621	0.53525	0.088871	0.010584	0.04586	-0.063459	0.61517	0.13994	0.049372	0.07089	0.18982
42.85714286	0.17037	1.5485	1.7075	0.018396	0.032711	0.043977	0.11257	-0.022367	0.018075	-0.020657	0.053655	0.042721	0.076674	0.027249	0.020877	0.030422	-0.016941	1.0229	0.25054	0.062451	-0.090419	-0.021186	0.11364	0.61625	0.11611	0.53935	0.134	0.087865	0.051628	0.041231	0.46486	0.15726	0.56616	0.56968	0.4635	0.17108	0.56565	0.42262	0.43606	0.53878	0.095608	-0.043948	0.063447	-0.059148	0.6227	0.15302	0.019146	0.099247	0.16736
42.92929293	0.1883	1.5235	1.6915	0.025948	0.056232	0.060123	0.078246	-0.0077657	0.0559	-0.031785	0.026799	0.021147	0.065234	0.031326	0.017836	0.011068	-0.00014904	0.97996	0.26302	0.052438	-0.095922	-0.015102	0.1213	0.62678	0.096782	0.54998	0.15161	0.10266	0.033324	0.054648	0.43432	0.17119	0.59086	0.53404	0.44671	0.18448	0.565	0.41027	0.43235	0.53246	0.055398	-0.07452	0.077411	-0.075667	0.66438	0.14239	0.0028593	0.068916	0.16804
43.001443	0.18293	1.487	1.6117	0.018082	0.049778	0.072066	0.046998	-0.0047809	0.046877	-0.01657	0.035132	-0.0018795	0.062621	0.055717	-0.0079334	-0.0019908	0.016096	0.88891	0.25647	0.064276	-0.09595	-0.042265	0.13254	0.62386	0.10209	0.49624	0.18279	0.10129	0.029258	0.039471	0.43455	0.16981	0.68049	0.47798	0.43919	0.1948	0.53327	0.45267	0.40079	0.44868	0.06217	-0.09335	0.054327	-0.096888	0.74653	0.10259	0.0091747	0.040855	0.14232
43.07359307	0.20341	1.4348	1.4788	0.0033107	0.014694	0.064834	0.036471	0.0029175	0.011518	0.014204	0.039869	0.0091412	0.078655	0.090045	-0.020971	-0.013745	0.031319	0.78768	0.21166	0.063131	-0.057046	-0.05695	0.11339	0.59146	0.1033	0.43225	0.19593	0.080692	0.0062117	0.010301	0.44758	0.16414	0.73197	0.41113	0.42905	0.17853	0.47634	0.54913	0.38012	0.37556	0.10471	-0.11993	0.022573	-0.082096	0.86676	0.069486	0.044965	0.053809	0.10192
43.14574315	0.23464	1.4337	1.3889	0.013113	-0.0064856	0.054169	0.057366	0.031962	-0.0086428	0.034217	0.03269	0.021983	0.075965	0.10192	-0.020271	-0.019538	0.025144	0.74045	0.22314	0.039345	0.040447	-0.033689	0.086085	0.56447	0.095202	0.40504	0.18291	0.073041	-0.020515	0.012074	0.43599	0.16087	0.77047	0.35634	0.38917	0.16987	0.45481	0.63096	0.40716	0.37766	0.10401	-0.10802	0.014964	-0.059313	0.9446	0.067171	0.06711	0.10397	0.044596
43.21789322	0.23243	1.4219	1.3969	0.03121	-0.016979	0.083694	0.082998	0.050076	-0.0037398	0.030109	0.024681	0.011517	0.052143	0.093204	-0.029332	-0.0071274	-0.012243	0.69341	0.24037	0.023022	0.15749	-0.0048396	0.073782	0.55536	0.089353	0.36275	0.17726	0.088774	-0.01994	0.021062	0.40547	0.16431	0.92444	0.33028	0.3576	0.17864	0.45983	0.65196	0.48585	0.43621	0.086968	-0.059997	0.029968	-0.054772	0.92427	0.093598	0.092209	0.17051	0.018338
43.29004329	0.2174	1.3445	1.4023	0.027102	-0.0051973	0.088397	0.072089	0.023581	-0.016381	0.016032	0.015022	0.011144	0.039307	0.088466	-0.03954	-0.00047496	-0.020323	0.66828	0.20419	0.033358	0.16901	-0.0044461	0.06337	0.55657	0.073003	0.31152	0.18023	0.11011	-0.031435	0.021872	0.38982	0.15934	1.1522	0.32092	0.39411	0.17395	0.44693	0.60566	0.58339	0.47848	0.082174	-0.06622	0.0089773	-0.074595	0.85147	0.089093	0.1056	0.29915	0.038043
43.36219336	0.21576	1.3146	1.378	0.0085788	0.017838	0.048862	0.042964	-0.019921	-0.028475	0.0076218	0.019252	0.031231	0.04235	0.083077	-0.041589	-0.0035	-0.005196	0.62983	0.17348	0.039552	0.11455	-0.0019422	0.048581	0.5633	0.048987	0.30444	0.16985	0.11587	-0.067711	0.017686	0.40318	0.14463	1.3265	0.34403	0.44273	0.16896	0.43721	0.57606	0.64574	0.46264	0.087769	-0.094437	-0.0066748	-0.098224	0.77431	0.069967	0.081391	0.4739	0.022549
43.43434343	0.2342	1.3314	1.317	0.0071186	0.029278	-0.0048903	0.02839	-0.03865	-0.015825	0.0025522	0.016863	0.047575	0.07627	0.097647	-0.038886	0.0033471	0.0029662	0.58334	0.1814	0.025091	0.093089	0.0050565	0.022131	0.56811	0.0086684	0.29818	0.16118	0.11267	-0.064778	0.010951	0.39606	0.13941	1.3777	0.39121	0.44805	0.16226	0.43088	0.54847	0.71721	0.41618	0.13036	-0.079817	0.00659	-0.098115	0.71928	0.085766	0.081286	0.5858	-0.016943
43.50649351	0.2311	1.2946	1.2482	0.0054408	0.047353	-0.013703	0.033453	-0.0422	-0.0094049	0.0055	-0.0021253	0.055537	0.093493	0.12476	-0.018811	0.026219	0.0060704	0.54872	0.1976	0.0092223	0.1089	-0.0091914	-0.017202	0.5533	-0.015658	0.30781	0.18358	0.12208	-0.084986	0.037843	0.35459	0.1446	1.412	0.42164	0.44802	0.15051	0.41989	0.53513	0.73611	0.37394	0.15771	-0.029278	-0.047559	-0.073478	0.68088	0.098719	0.078337	0.64019	-0.024521
43.57864358	0.22543	1.2194	1.1949	-0.00088864	0.083296	0.029271	0.043006	-0.044312	-0.025314	0.011795	-0.032781	0.040519	0.061178	0.12309	-0.0092512	0.03979	-0.014108	0.51758	0.16489	0.0089719	0.11468	-0.016781	-0.019439	0.5766	-0.01606	0.33075	0.21134	0.12203	-0.049859	0.076947	0.3234	0.158	1.439	0.41002	0.45835	0.14535	0.3703	0.52214	0.71119	0.34951	0.17361	0.0096911	-0.089035	-0.047453	0.67803	0.12865	0.06027	0.67078	-0.012877
43.65079365	0.22472	1.1535	1.1533	-0.027268	0.095658	0.053467	0.036955	-0.023179	-0.027131	0.00017097	-0.04725	0.037319	0.038665	0.11462	-0.019116	0.048841	0.0018023	0.51212	0.12162	-0.016806	0.10086	-0.019396	-0.012485	0.63747	0.0048999	0.33809	0.19606	0.12157	-0.063813	0.070154	0.31207	0.17406	1.3764	0.38392	0.47018	0.13564	0.32552	0.51973	0.75674	0.36019	0.21546	-0.017349	-0.054962	-0.05295	0.66575	0.22251	0.034624	0.67197	-0.0097478
43.72294372	0.21353	1.0997	1.1514	-0.078702	0.070305	0.080242	0.016311	0.011441	-0.023353	-0.037092	-0.013406	0.045835	0.02781	0.10816	-0.028488	0.039	0.057963	0.50629	0.13136	-0.055608	0.099058	-0.0066345	-0.0072727	0.68513	0.031712	0.30134	0.16715	0.13582	-0.083259	0.065793	0.27096	0.17197	1.2654	0.37388	0.45657	0.10582	0.32062	0.52946	0.83319	0.39443	0.21442	-0.090442	-0.046884	-0.058066	0.6568	0.32979	0.027279	0.60558	-0.036589
43.7950938	0.2218	1.0463	1.1424	-0.089692	0.0536	0.11645	0.025184	0.027571	-0.031944	-0.072549	0.031033	0.077039	-0.0019195	0.10638	-0.035911	0.028557	0.044427	0.49073	0.18304	-0.066707	0.10444	-0.0061131	-0.0045089	0.75739	0.036695	0.2581	0.13794	0.12775	-0.05223	0.093809	0.2153	0.16377	1.1523	0.38946	0.422	0.07402	0.31553	0.58298	0.8459	0.42628	0.18545	-0.14322	-0.064348	-0.053651	0.64529	0.38742	0.052022	0.54975	-0.059337
43.86724387	0.19938	0.9592	1.0997	-0.069501	0.075524	0.1391	0.033508	0.026425	-0.052313	-0.08481	0.048219	0.1177	-0.03693	0.089761	-0.031701	0.034614	0.0032486	0.43046	0.21451	-0.043614	0.099182	-0.04296	-0.021904	0.80214	0.051439	0.2322	0.16158	0.1349	-0.012196	0.089264	0.19477	0.15883	1.0782	0.38637	0.39508	0.05716	0.29027	0.62597	0.78498	0.44165	0.19623	-0.13979	-0.093517	-0.032945	0.65798	0.3918	0.086195	0.53415	-0.074587
43.93939394	0.14668	0.91556	1.0714	-0.034556	0.067413	0.1175	0.02361	0.0020226	-0.070963	-0.071368	0.047242	0.12723	-0.054629	0.081957	-0.021781	0.055772	0.01212	0.35079	0.20587	-0.027712	0.10473	-0.071011	-0.033825	0.76747	0.08601	0.23189	0.25455	0.17363	-0.012054	0.059679	0.23297	0.14409	1.0119	0.36063	0.36521	0.047582	0.262	0.67827	0.72511	0.48656	0.26714	-0.10122	-0.10853	-0.015476	0.69682	0.39534	0.072027	0.52816	-0.061044
44.01154401	0.10993	0.9142	1.0987	-0.012767	0.039507	0.070715	0.028707	0.011497	-0.06479	-0.028864	0.051362	0.093231	-0.058914	0.097165	-0.022878	0.068791	0.034062	0.3238	0.18128	-0.036588	0.11026	-0.066104	-0.032101	0.74516	0.097978	0.26675	0.3285	0.16146	-0.0039415	0.054745	0.26242	0.13921	0.99495	0.3351	0.34679	0.046488	0.26234	0.77939	0.71805	0.53012	0.31717	-0.053041	-0.095116	-0.014273	0.69972	0.41828	0.058531	0.4896	-0.029177
44.08369408	0.11586	0.90427	1.0983	-0.001427	0.050614	0.056959	0.046008	0.04676	-0.046697	-0.01512	0.067119	0.051807	-0.046028	0.12318	-0.03888	0.064269	0.0411	0.3252	0.11974	-0.026191	0.10538	-0.042903	-0.032544	0.68824	0.092981	0.28932	0.36043	0.13093	-0.035347	0.053859	0.2532	0.14479	0.9701	0.32879	0.33144	0.071648	0.26271	0.84205	0.73117	0.54662	0.31238	-0.0029148	-0.074644	-0.0086078	0.65541	0.41104	0.051088	0.48562	-0.029037
44.15584416	0.13511	0.85983	1.1126	0.0046973	0.085957	0.089434	0.037542	0.047302	-0.045379	-0.012517	0.058502	0.046402	-0.026743	0.14627	-0.035181	0.035757	0.039829	0.32454	0.075681	-0.00030587	0.11246	-0.029945	-0.024603	0.60955	0.094548	0.3067	0.37117	0.16363	-0.049352	0.027734	0.2177	0.14508	0.91771	0.31075	0.29222	0.12086	0.24853	0.80955	0.68052	0.51058	0.34165	0.028497	-0.034719	0.012065	0.59398	0.36744	0.059547	0.57049	-0.045428
44.22799423	0.12166	0.80255	1.1377	-0.01877	0.076497	0.1259	0.014547	0.0079582	-0.059755	0.0064224	0.044934	0.066023	-0.033296	0.16344	0.0096435	0.010229	0.032351	0.31134	0.091789	0.021125	0.15303	-0.0079447	-0.012829	0.56413	0.082955	0.34367	0.37829	0.19823	-0.068929	0.026043	0.23036	0.15931	0.8654	0.30326	0.25603	0.17924	0.21435	0.7633	0.59199	0.4526	0.38442	0.063051	-0.013755	0.00028705	0.54834	0.35569	0.096336	0.67819	-0.03053
44.3001443	0.093525	0.74427	1.1271	-0.067292	0.050423	0.13014	-0.021004	0.0011509	-0.067895	0.018878	0.059167	0.08469	-0.046383	0.17397	0.043812	0.037187	0.0048425	0.3466	0.12635	0.022341	0.15461	0.022321	0.0040036	0.54768	0.073591	0.351	0.36603	0.19705	-0.061531	0.029436	0.21879	0.18032	0.83123	0.30932	0.25794	0.21404	0.19077	0.73261	0.5764	0.41675	0.39724	0.052659	-0.040809	-0.05074	0.49628	0.37767	0.11021	0.66787	0.010043
44.37229437	0.092049	0.68634	1.1038	-0.097523	0.066752	0.093714	-0.041777	0.018293	-0.0689	0.00067137	0.07931	0.11016	-0.06209	0.16181	0.035052	0.089122	-0.017799	0.47322	0.15316	0.0095574	0.10725	0.037341	0.0074277	0.5285	0.08681	0.34166	0.33279	0.20745	-0.02704	0.025806	0.23481	0.18054	0.91312	0.3164	0.2656	0.21306	0.17796	0.71751	0.58396	0.42271	0.39367	0.054406	-0.063168	-0.070492	0.44586	0.33412	0.08972	0.64621	0.037522
44.44444444	0.092551	0.66656	1.0412	-0.096655	0.084387	0.069265	-0.042929	0.014652	-0.045004	-0.019787	0.07376	0.11419	-0.068082	0.12241	0.029239	0.089286	-0.04871	0.5948	0.16248	-0.019182	0.070478	0.053496	-0.0097629	0.51967	0.12004	0.33965	0.29893	0.22225	-0.020616	0.025217	0.2496	0.15668	1.1441	0.30092	0.24649	0.19714	0.16306	0.70301	0.52568	0.41522	0.38418	0.10735	-0.048979	-0.071415	0.41866	0.30698	0.079026	0.63443	0.023219
44.51659452	0.10803	0.62459	0.99821	-0.07078	0.084988	0.045768	-0.047804	-0.015763	-0.022708	-0.019694	0.047942	0.092863	-0.06963	0.091743	0.053587	0.072603	-0.064307	0.61051	0.12748	-0.032635	0.054185	0.080984	-0.022772	0.51409	0.13987	0.34004	0.26597	0.21387	0.00090247	0.01398	0.23067	0.12885	1.408	0.2717	0.24157	0.18072	0.14647	0.68305	0.47269	0.37609	0.38574	0.10276	-0.038896	-0.062616	0.38433	0.36507	0.084877	0.59248	-0.034986
44.58874459	0.12795	0.57005	0.99747	-0.03383	0.077776	0.035194	-0.03073	-0.04126	-0.011463	-0.028271	0.034888	0.087907	-0.081773	0.075912	0.066795	0.076412	-0.042128	0.63693	0.094998	-0.034817	0.028091	0.095794	-0.023558	0.47631	0.12858	0.35267	0.24494	0.18566	0.0067053	-0.0054263	0.22962	0.13063	1.6054	0.25093	0.2545	0.15832	0.16202	0.64405	0.46086	0.34275	0.37355	0.095292	-0.083744	-0.062392	0.37649	0.39973	0.11286	0.61918	-0.096951
44.66089466	0.10112	0.53523	0.94916	-0.030629	0.060878	0.047158	-0.0062332	-0.038703	-0.0059066	-0.026229	0.054651	0.10268	-0.098215	0.067165	0.051984	0.084103	-0.013456	0.83392	0.14697	-0.039524	0.013052	0.11385	-0.016071	0.45782	0.089688	0.35934	0.21871	0.13552	0.023444	-0.020781	0.23135	0.14634	1.7284	0.26512	0.2553	0.1387	0.21112	0.59858	0.43042	0.34766	0.33424	0.17226	-0.16528	-0.067058	0.39054	0.41105	0.12382	0.67284	-0.054427
44.73304473	0.060041	0.52817	0.90604	-0.05009	0.068719	0.034387	-0.0014387	-0.0073815	0.0030212	-0.0050291	0.079018	0.11748	-0.091279	0.048655	0.036856	0.075908	0.012088	1.0447	0.15993	-0.046195	0.026005	0.1233	-0.022891	0.43709	0.074699	0.35708	0.19924	0.11944	0.03308	-0.019092	0.2494	0.15384	1.8271	0.27884	0.24922	0.14696	0.26484	0.55488	0.40455	0.35275	0.27517	0.30772	-0.16988	-0.058748	0.38059	0.45089	0.12475	0.71182	0.052015
44.80519481	0.053476	0.50066	0.87452	-0.070628	0.09028	-0.0086513	0.0012032	0.010001	0.012287	0.00066626	0.068999	0.11338	-0.076855	0.037058	0.030625	0.057084	-0.012954	1.2042	0.15843	-0.051766	0.031319	0.13282	-0.026467	0.40571	0.076702	0.35671	0.19546	0.15415	0.033718	0.00063715	0.26176	0.14202	1.9483	0.27224	0.25983	0.15244	0.29369	0.50184	0.40246	0.33209	0.209	0.43962	-0.094074	-0.026992	0.33349	0.49838	0.12346	0.76214	0.11672
44.87734488	0.045859	0.44171	0.85578	-0.061758	0.078356	-0.049123	-0.0055847	-0.0016838	0.0029817	-0.029795	0.047609	0.089834	-0.086353	0.029222	0.039367	0.061916	-0.028244	1.2637	0.16515	-0.066786	0.013769	0.13536	-0.0078137	0.40211	0.074005	0.38586	0.19565	0.14978	0.055931	0.006517	0.29384	0.11221	2.0846	0.2666	0.28265	0.13472	0.30285	0.48161	0.41047	0.29678	0.18985	0.49505	-0.0061008	0.013421	0.31917	0.55924	0.13966	0.80435	0.10918
44.94949495	0.042783	0.43264	0.83117	-0.027733	0.067581	-0.074242	-0.0039388	-0.027854	0.0038063	-0.036478	0.030818	0.06679	-0.10699	0.0091081	0.035343	0.063613	0.0021546	1.4372	0.21658	-0.086418	-0.019376	0.11285	-0.012837	0.43797	0.086044	0.41813	0.20093	0.098769	0.048716	0.016218	0.32827	0.091026	2.1684	0.25431	0.29356	0.10348	0.28606	0.46114	0.41999	0.25816	0.20441	0.48968	0.052198	0.014726	0.33454	0.57475	0.11982	0.82719	0.094625
45.02164502	0.049697	0.44865	0.81766	-0.014229	0.074098	-0.067631	0.015082	-0.022294	0.025602	0.0074468	0.020498	0.050717	-0.091005	-0.0070152	0.011239	0.044165	0.027356	1.6291	0.28412	-0.062387	-0.022913	0.10787	-0.031579	0.43838	0.12907	0.42765	0.21346	0.074411	0.006842	0.030928	0.35195	0.095644	2.1693	0.23742	0.28296	0.068459	0.24698	0.38632	0.37079	0.22612	0.18622	0.54286	0.03552	-0.022447	0.38469	0.51937	0.073643	0.86105	0.10121
45.09379509	0.067518	0.4358	0.78631	-0.025349	0.081822	-0.044641	0.0036867	0.008257	0.01531	0.047199	0.027618	0.056951	-0.061066	0.0090013	0.00061115	0.016925	0.035464	1.7719	0.30768	-0.033864	-0.041857	0.139	-0.014424	0.38922	0.1978	0.40907	0.22289	0.12131	-0.033403	0.031374	0.38804	0.091886	2.1493	0.20891	0.27544	0.052869	0.22682	0.31247	0.31891	0.21791	0.16344	0.6501	0.03158	-0.025805	0.40003	0.43797	0.063996	0.8647	0.12056
45.16594517	0.085502	0.40269	0.72184	-0.035303	0.075521	0.010406	-0.025979	0.0021867	-0.0043708	0.036317	0.014991	0.04014	-0.051874	0.020187	0.0032924	0.029012	0.053452	1.8455	0.30699	-0.033075	-0.056256	0.16899	0.011394	0.34171	0.26114	0.40424	0.22098	0.18124	-0.056156	0.032585	0.43782	0.08114	2.1078	0.17799	0.26806	0.061825	0.22691	0.31992	0.31364	0.22196	0.18698	0.69336	0.042117	-0.019781	0.34976	0.40764	0.085487	0.85035	0.11249
45.23809524	0.079678	0.38119	0.63242	-0.03085	0.073152	0.073902	-0.051139	-0.033111	-0.0099227	0.0087886	-0.02503	0.0062569	-0.052591	0.0002855	-0.024324	0.059811	0.076759	1.8476	0.30214	-0.013586	-0.048142	0.17461	0.011637	0.30369	0.29956	0.3976	0.20746	0.21279	-0.06217	0.033467	0.46576	0.081381	2.0618	0.1691	0.26124	0.082463	0.22009	0.36939	0.30488	0.25786	0.18373	0.69077	0.045602	-0.062093	0.32326	0.42599	0.11954	0.83845	0.074738
45.31024531	0.076159	0.38387	0.5826	-0.019285	0.097069	0.097201	-0.060538	-0.020958	-0.012243	0.0032181	-0.046164	-0.0053983	-0.059598	-0.016351	-0.079386	0.074521	0.084554	1.8	0.31674	0.016709	-0.043988	0.19273	0.019241	0.29045	0.29701	0.36382	0.20741	0.21908	-0.04254	0.035964	0.45993	0.086126	2.0003	0.18036	0.24035	0.087146	0.20037	0.34608	0.27001	0.2759	0.14231	0.70404	0.089357	-0.096783	0.35493	0.41752	0.15581	0.7927	0.094754
45.38239538	0.086058	0.36413	0.61271	-0.029427	0.10266	0.071888	-0.029207	-0.010198	-0.0044502	0.020012	-0.023326	0.011805	-0.068552	-0.018863	-0.082802	0.04858	0.10844	1.8011	0.36205	0.030607	-0.040113	0.22281	0.065387	0.2925	0.24714	0.33462	0.20448	0.21014	-0.038448	0.051075	0.41839	0.07987	1.924	0.1937	0.19934	0.068115	0.17958	0.29698	0.22392	0.25119	0.13485	0.672	0.12129	-0.094675	0.3714	0.38331	0.15175	0.66307	0.13782
45.45454545	0.091655	0.29743	0.67386	-0.041328	0.077811	0.039802	0.0004241	-0.015154	0.012459	0.029631	0.023718	0.048888	-0.067238	-0.0087282	-0.072802	0.039024	0.16288	1.8861	0.4239	0.022307	-0.026104	0.26172	0.11448	0.31463	0.20766	0.32635	0.20109	0.19645	-0.033661	0.063079	0.37854	0.071539	1.7572	0.18392	0.16788	0.019057	0.16455	0.30064	0.207	0.23503	0.1717	0.58531	0.095204	-0.050277	0.31481	0.41182	0.10428	0.56489	0.11521
45.52669553	0.067588	0.28152	0.7055	-0.041678	0.061693	0.052434	-0.0036435	0.0011894	0.021008	0.021542	0.046491	0.084797	-0.056569	0.011329	-0.072597	0.046474	0.20555	1.9178	0.43883	0.034318	-0.046033	0.29447	0.12141	0.31256	0.22378	0.33539	0.22443	0.17789	-0.036446	0.063156	0.37222	0.075986	1.547	0.18261	0.1432	-0.025163	0.14441	0.29262	0.1765	0.27405	0.17279	0.51501	0.10331	-0.0028943	0.2762	0.43314	0.12614	0.52819	0.075306
45.5988456	0.044801	0.28694	0.71403	-0.034222	0.057519	0.063563	-0.0028787	0.018446	0.0097587	0.021028	0.046132	0.091607	-0.064245	0.016932	-0.060866	0.062651	0.22067	1.8583	0.40986	0.050256	-0.081571	0.26218	0.10294	0.31712	0.27575	0.34932	0.2391	0.15139	-0.035452	0.080667	0.36536	0.071521	1.4654	0.18854	0.10533	-0.037988	0.14328	0.24663	0.15839	0.28984	0.17928	0.48567	0.11879	-0.0017729	0.31642	0.4518	0.16722	0.49269	0.073302
45.67099567	0.043974	0.2533	0.72182	-0.019937	0.062238	0.04593	0.015637	0.020125	-0.020418	0.019218	0.064372	0.095697	-0.079311	0.013051	-0.043433	0.080244	0.25767	1.8043	0.39942	0.07107	-0.079747	0.21673	0.069028	0.31058	0.32379	0.33258	0.22569	0.13955	-0.014889	0.14117	0.37043	0.054968	1.463	0.18601	0.080714	-0.039997	0.16462	0.2012	0.18681	0.28075	0.15553	0.46937	0.1254	-0.024323	0.32028	0.46178	0.16604	0.5103	0.096918
45.74314574	0.0433	0.21132	0.74709	-0.0007707	0.063231	0.030785	0.032644	0.0028283	-0.041757	-0.0056999	0.10372	0.0978	-0.057514	0.0073086	-0.016051	0.079935	0.3108	1.7562	0.38765	0.072984	-0.0751	0.1821	0.047272	0.29026	0.36434	0.31889	0.2199	0.14656	0.014623	0.21683	0.38985	0.051382	1.4055	0.18552	0.060995	-0.050324	0.19281	0.19137	0.19871	0.28421	0.10346	0.42835	0.09155	-0.040246	0.27128	0.46822	0.12525	0.59416	0.10845
45.81529582	0.039916	0.22527	0.75739	0.024482	0.040667	0.034329	0.03328	-0.0022431	-0.039329	-0.038544	0.13109	0.09229	0.0097005	-0.01355	0.010985	0.070397	0.35232	1.7107	0.35974	0.056121	-0.067508	0.15355	0.026374	0.31324	0.3881	0.32844	0.21721	0.13782	0.045304	0.21477	0.4024	0.073209	1.2186	0.18592	0.062592	-0.059694	0.21498	0.18355	0.18451	0.26568	0.080303	0.36834	0.068694	-0.049756	0.22412	0.45085	0.090872	0.61896	0.15466
45.88744589	0.051652	0.23904	0.76733	0.02498	0.015712	0.0097024	0.0014735	0.028625	-0.05249	-0.047725	0.15	0.12151	0.067218	-0.036742	0.040529	0.083582	0.36615	1.6865	0.33586	0.068748	-0.041855	0.13825	-0.0039487	0.34917	0.46665	0.31847	0.197	0.092909	0.056504	0.14701	0.38775	0.091414	1.1145	0.17171	0.07122	-0.061825	0.23477	0.15779	0.1878	0.2389	0.1231	0.35892	0.074104	-0.0126	0.21149	0.42276	0.090143	0.52322	0.19622
45.95959596	0.067345	0.24176	0.7596	0.024494	-0.0023163	-0.01844	-0.0099731	0.040622	-0.055576	-0.047903	0.17309	0.16144	0.090535	-0.026817	0.063457	0.096023	0.32521	1.6418	0.3459	0.087295	-0.00046723	0.11794	-0.018695	0.37169	0.61816	0.29506	0.18188	0.062708	0.056211	0.121	0.36166	0.10749	1.1394	0.15778	0.067063	-0.066277	0.2637	0.15598	0.17831	0.23843	0.19292	0.41883	0.13755	0.044254	0.22475	0.39815	0.094398	0.41703	0.19551
46.03174603	0.073818	0.23577	0.72795	0.024885	0.01852	-0.039705	0.024958	0.033345	-0.063512	-0.046876	0.16931	0.17558	0.10172	-0.011559	0.074231	0.087408	0.27909	1.6023	0.38796	0.055307	0.032196	0.11083	-0.0036959	0.36173	0.7097	0.30513	0.17323	0.061754	0.059173	0.11806	0.36078	0.11226	1.1191	0.14355	0.043821	-0.073839	0.29213	0.195	0.19058	0.23122	0.27197	0.46641	0.20856	0.063176	0.18855	0.36086	0.086177	0.37928	0.24732
46.1038961	0.064729	0.22014	0.68012	-0.0050676	0.060298	-0.073769	0.056397	0.04802	-0.073523	-0.047696	0.13695	0.14987	0.09839	-0.0089719	0.062769	0.074986	0.24648	1.559	0.37757	0.013008	0.04747	0.12734	0.027956	0.33857	0.70028	0.3527	0.16436	0.050133	0.11591	0.091474	0.36378	0.092513	1.0254	0.11792	0.026187	-0.073362	0.28447	0.2513	0.21276	0.20286	0.31121	0.46064	0.22535	0.059954	0.13892	0.32704	0.07899	0.3753	0.27306
46.17604618	0.049631	0.21495	0.67223	-0.01723	0.061401	-0.1132	0.046816	0.056565	-0.061595	-0.066644	0.10529	0.11884	0.093463	-0.0078928	0.040829	0.07228	0.22941	1.5123	0.36337	-0.02448	0.058725	0.13207	0.055979	0.3428	0.64541	0.3924	0.15131	0.006431	0.21754	0.068263	0.35697	0.074247	0.92728	0.11012	0.005741	-0.063543	0.24976	0.27197	0.20379	0.14993	0.28129	0.44124	0.19965	0.075233	0.13042	0.2924	0.090751	0.35976	0.28603
46.24819625	0.029085	0.20701	0.66578	-0.0099632	0.069575	-0.158	0.02065	0.034563	-0.054158	-0.079177	0.083498	0.11905	0.11354	-0.0013378	0.039855	0.069755	0.19365	1.3974	0.40976	-0.029641	0.08817	0.14319	0.085019	0.39067	0.5572	0.40387	0.15303	-0.018677	0.32059	0.070443	0.37107	0.077429	0.9019	0.11573	-0.013484	-0.060449	0.21905	0.25969	0.22	0.12629	0.27376	0.43611	0.1402	0.083712	0.16067	0.27819	0.084651	0.38353	0.33658
46.32034632	0.020134	0.20469	0.63727	-0.001814	0.11044	-0.1943	0.0047634	0.015085	-0.056853	-0.054413	0.057386	0.10254	0.12388	0.013071	0.044095	0.069073	0.15702	1.2985	0.46463	0.0046203	0.12235	0.16738	0.12195	0.41845	0.46081	0.37083	0.16023	-0.0044009	0.38221	0.10752	0.3563	0.090026	0.8429	0.10943	-0.0041823	-0.076731	0.2141	0.274	0.2738	0.12452	0.27103	0.39001	0.086092	0.087663	0.20159	0.28194	0.07208	0.44973	0.39221
46.39249639	0.052777	0.23485	0.63828	0.008462	0.11933	-0.17953	0.0076991	0.024244	-0.027301	-0.034256	0.015931	0.055588	0.10957	0.017447	0.044832	0.060376	0.13541	1.2619	0.43528	0.012592	0.13648	0.18071	0.1379	0.41045	0.40963	0.32336	0.15798	0.012484	0.41386	0.12934	0.32942	0.10921	0.74762	0.082615	-0.011625	-0.087103	0.20343	0.27778	0.29187	0.11749	0.23533	0.29703	0.062648	0.086424	0.22284	0.26051	0.076614	0.48845	0.46354
46.46464646	0.071683	0.24427	0.64832	-0.02177	0.1089	-0.14923	0.019072	0.046947	0.019444	-0.018071	-0.0019285	0.027221	0.11848	-0.0024517	0.062054	0.03594	0.12092	1.2311	0.3901	-0.01572	0.12703	0.1999	0.13389	0.39423	0.40771	0.28979	0.15214	-0.021383	0.41167	0.11034	0.3	0.11423	0.68397	0.048104	-0.01783	-0.082634	0.19513	0.25353	0.26895	0.12843	0.18638	0.25747	0.058385	0.052683	0.2794	0.23401	0.055855	0.48518	0.57054
46.53679654	0.077192	0.23542	0.63688	-0.0515	0.098182	-0.1184	0.030812	0.053147	0.09446	-0.0028506	-0.010218	0.026719	0.14297	-0.028161	0.082011	0.016579	0.11907	1.1759	0.39943	-0.014009	0.087473	0.24252	0.11356	0.38431	0.44384	0.26554	0.16694	-0.055221	0.41709	0.093824	0.24625	0.12041	0.67994	0.029645	-0.017009	-0.078707	0.2205	0.23768	0.2358	0.1146	0.16064	0.27045	0.056778	0.047309	0.36747	0.20855	0.011833	0.40688	0.68107
46.60894661	0.098971	0.23491	0.60452	-0.059556	0.063122	-0.081891	0.031867	0.073137	0.21953	-0.00027722	-0.034858	0.022866	0.17873	-0.032954	0.1039	0.0079686	0.10769	1.1419	0.40223	-0.00072232	0.0239	0.24337	0.082662	0.36754	0.4921	0.24296	0.19183	-0.066562	0.45283	0.086129	0.20485	0.12819	0.65213	0.041587	-0.038259	-0.063294	0.26545	0.22645	0.20239	0.072351	0.15379	0.25814	0.1085	0.032068	0.40707	0.17627	-0.035881	0.37233	0.73698
46.68109668	0.10551	0.20794	0.55596	-0.055606	0.042466	-0.091005	0.018811	0.067435	0.36668	0.014793	-0.042917	0.016412	0.23838	-0.020568	0.13766	-0.0065721	0.058493	1.1094	0.37618	0.0067883	-0.0092979	0.21313	0.064603	0.34634	0.52163	0.23783	0.21032	-0.073146	0.51142	0.073198	0.19874	0.12458	0.56833	0.048891	-0.049862	-0.05148	0.30127	0.19116	0.1828	0.063598	0.16389	0.23865	0.089596	-0.00080653	0.43822	0.12636	-0.039572	0.38227	0.77521
46.75324675	0.076039	0.1673	0.50978	-0.024914	0.057365	-0.099787	0.011561	0.041251	0.48649	0.066616	-0.04429	-0.0038143	0.28648	-0.016991	0.15707	-0.011442	0.035751	1.0463	0.34501	-0.0099443	-0.01689	0.21071	0.067894	0.33339	0.50778	0.28327	0.23421	-0.087751	0.5681	0.068309	0.22202	0.12373	0.55086	0.040405	-0.041682	-0.049391	0.3055	0.17472	0.18495	0.079563	0.14356	0.26295	0.028351	0.0092203	0.5437	0.14937	-0.037866	0.34522	0.82133
46.82539683	0.033787	0.14658	0.49536	-0.026907	0.076108	-0.076244	0.027824	0.031801	0.51313	0.12419	-0.065267	-0.052758	0.29681	-0.0045362	0.17075	-0.013487	0.067341	0.99382	0.31084	-0.031552	-0.026566	0.24322	0.068115	0.35962	0.46776	0.3538	0.26059	-0.10129	0.55088	0.050034	0.24748	0.10891	0.59278	0.041003	-0.015599	-0.050826	0.30282	0.21621	0.16421	0.069932	0.097536	0.31523	0.013489	0.013975	0.6388	0.22218	-0.025891	0.3327	0.83873
46.8975469	0.025986	0.14984	0.47817	-0.075371	0.078673	-0.056815	0.031258	0.033899	0.48035	0.16736	-0.084823	-0.066524	0.31543	0.014538	0.19749	-0.023293	0.06914	0.95657	0.27898	-0.019803	-0.057657	0.25507	0.068212	0.38302	0.40589	0.38776	0.26574	-0.10684	0.49738	0.034223	0.22894	0.08877	0.63616	0.025887	0.030878	-0.029033	0.29904	0.2838	0.15618	0.028411	0.12325	0.34744	0.01583	-0.0065382	0.60375	0.231	0.012588	0.38028	0.85223
46.96969697	0.0388	0.14676	0.44814	-0.092268	0.057137	-0.031054	0.01431	0.030071	0.43643	0.21391	-0.071956	-0.028751	0.31993	0.018058	0.22432	-0.030428	0.052777	0.93784	0.27998	0.079115	-0.074988	0.24025	0.073879	0.37612	0.3294	0.39425	0.25882	-0.092198	0.49661	0.036343	0.16324	0.090238	0.65576	0.015092	0.074682	0.008334	0.28749	0.37325	0.17246	0.014049	0.18021	0.38987	0.036804	0.034406	0.54921	0.20191	-0.0010863	0.40835	0.91395
47.04184704	0.031988	0.14127	0.43813	-0.069182	0.052099	-0.014949	0.02865	0.02678	0.48418	0.25711	-0.039912	0.00096379	0.31261	0.0046271	0.22213	-0.039704	0.050848	0.87572	0.27494	0.24388	-0.089751	0.2706	0.09309	0.39326	0.27733	0.39666	0.27323	-0.061227	0.55959	0.038118	0.13272	0.083351	0.66872	0.031303	0.087973	0.025979	0.25448	0.44527	0.14376	0.022818	0.16927	0.43563	0.031954	0.10258	0.54882	0.19283	-0.036604	0.39681	0.99273
47.11399711	0.010787	0.14832	0.44133	-0.058122	0.056495	-0.02436	0.02824	0.039798	0.56409	0.28289	-0.019174	-0.0046796	0.30178	0.0018422	0.21124	-0.034046	0.084315	0.79083	0.2426	0.31774	-0.11696	0.29362	0.094323	0.42289	0.26954	0.39267	0.30069	-0.043631	0.68571	0.035924	0.15021	0.052805	0.65337	0.053973	0.081734	0.038511	0.22271	0.47612	0.097934	0.012999	0.11179	0.48929	0.05163	0.12102	0.57306	0.16144	-0.038831	0.39081	1.0111
47.18614719	0.046005	0.14969	0.41477	-0.080749	0.03283	-0.031013	0.023322	0.044903	0.56956	0.28847	-0.025615	0.004191	0.32454	0.022952	0.21773	-0.021748	0.13183	0.74574	0.2017	0.31622	-0.11989	0.28325	0.067704	0.40856	0.25697	0.40117	0.30941	-0.021467	0.78168	0.036848	0.15043	0.025408	0.59878	0.075145	0.071699	0.051513	0.2218	0.5421	0.082068	-0.023356	0.1015	0.53455	0.081528	0.12817	0.54842	0.11928	-0.05173	0.3673	1.0194
47.25829726	0.09997	0.15775	0.39799	-0.081866	0.0086306	-0.049889	0.027785	0.0319	0.55913	0.31585	-0.028737	-0.0031415	0.32786	0.044786	0.21744	-0.0068361	0.12457	0.73315	0.17258	0.31281	-0.091538	0.2744	0.062359	0.38362	0.24903	0.43514	0.32042	0.001432	0.89558	0.036889	0.11713	0.012477	0.59011	0.091969	0.04944	0.053065	0.23961	0.64056	0.090716	-0.026582	0.11784	0.54931	0.050778	0.1383	0.50306	0.12827	-0.062715	0.38283	1.0918
47.33044733	0.081833	0.1405	0.37888	-0.05059	0.01987	-0.043006	0.026866	0.024673	0.54448	0.3021	-0.0082537	-0.020419	0.30682	0.047264	0.19803	-0.0029933	0.056638	0.70091	0.17703	0.30202	-0.063891	0.26834	0.074675	0.36004	0.27479	0.44677	0.349	0.015762	1.0232	0.031723	0.095844	0.0063833	0.66265	0.095303	0.019881	0.063909	0.2516	0.66419	0.093174	-0.010477	0.089505	0.55187	0.021859	0.12008	0.51143	0.15884	-0.078747	0.37969	1.1679
47.4025974	0.02074	0.12906	0.33316	-0.013382	0.046358	0.0092306	0.048972	0.043121	0.52987	0.25845	-0.0049455	-0.00011735	0.25767	0.03891	0.16405	-0.0092562	0.013899	0.65397	0.20756	0.28564	-0.049644	0.26171	0.095633	0.35513	0.31232	0.44457	0.37631	0.0085607	1.1085	0.023322	0.089523	0.0070079	0.74635	0.075449	0.022433	0.0806	0.25293	0.62956	0.085837	-0.027016	0.040016	0.583	0.024957	0.10187	0.57303	0.18789	-0.10757	0.33824	1.2468
47.47474747	-0.027743	0.19148	0.31927	-0.0083067	0.044621	0.024055	0.058247	0.060939	0.54156	0.23983	-0.019804	0.029963	0.2154	0.036498	0.13436	-0.0057726	0.028413	0.6138	0.20763	0.24564	-0.041868	0.23092	0.10914	0.35352	0.32779	0.47505	0.42405	-0.0008516	1.1344	-0.0133	0.076369	0.027618	0.79683	0.071153	0.043275	0.081046	0.26186	0.61865	0.082289	-0.05753	0.035594	0.54686	0.0072647	0.090194	0.61248	0.17144	-0.0896	0.33122	1.3233
47.54689755	-0.021161	0.31509	0.31596	-0.02023	0.033242	0.0053026	0.031273	0.04879	0.54345	0.22443	-0.035836	0.021905	0.19918	0.065725	0.11648	0.010087	0.043708	0.59961	0.21122	0.21533	-0.057297	0.21372	0.11048	0.34753	0.34131	0.52066	0.47092	0.0038816	1.113	-0.045389	0.076592	0.046064	0.83831	0.096453	0.04659	0.082173	0.28161	0.60782	0.042081	-0.041509	0.018785	0.46969	-0.053549	0.14018	0.63511	0.11561	-0.040708	0.33841	1.3608
47.61904762	0.028205	0.39338	0.29557	-0.031215	0.029196	-0.0045833	0.034375	0.036949	0.54453	0.22232	-0.041505	0.013403	0.18938	0.090772	0.10932	0.025871	0.048299	0.56233	0.20284	0.18833	-0.078477	0.2444	0.11824	0.31282	0.30883	0.50999	0.45978	0.0066635	1.0734	-0.050648	0.10306	0.050716	0.95686	0.1339	0.041772	0.091913	0.2779	0.58395	0.017563	-0.025013	0.018499	0.4549	-0.0843	0.25117	0.65083	0.10294	-0.058474	0.31784	1.3153
47.69119769	0.037618	0.41866	0.27445	-0.014974	0.03198	-0.014147	0.07698	0.048831	0.54307	0.22294	-0.019985	0.023627	0.19968	0.10473	0.11086	0.022871	0.045352	0.50991	0.15093	0.19973	-0.053778	0.25683	0.13926	0.25106	0.26658	0.44911	0.42317	0.015474	1.0173	-0.041086	0.11973	0.035639	1.1403	0.16365	0.039017	0.073659	0.24226	0.55886	0.036689	-0.038618	0.046194	0.47045	-0.070489	0.29402	0.63256	0.16015	-0.081479	0.27651	1.2556
47.76334776	0.018972	0.43264	0.28588	-0.0031624	0.028999	-0.022383	0.10269	0.037441	0.53396	0.20254	-0.01913	0.018635	0.22268	0.095917	0.10831	0.006908	0.034543	0.48648	0.1437	0.25511	-0.028009	0.24026	0.14533	0.2491	0.23686	0.41014	0.38587	0.030912	0.95783	-0.040626	0.12666	0.026653	1.2549	0.19474	0.062773	0.026067	0.2305	0.57252	0.034638	-0.068647	0.057088	0.4901	-0.058917	0.27841	0.62133	0.1651	-0.022107	0.29358	1.2636
47.83549784	0.032022	0.44829	0.29099	-0.0066683	0.027287	-0.045545	0.092322	0.013994	0.5021	0.19017	-0.052019	-0.017941	0.23525	0.090228	0.094354	0.030041	0.015807	0.47323	0.17823	0.29423	-0.035104	0.23255	0.13458	0.28124	0.20208	0.41694	0.35737	0.058453	0.89678	-0.054406	0.15012	0.028277	1.3186	0.19413	0.1102	0.0019748	0.27501	0.62659	0.011078	-0.074999	0.097175	0.52918	-0.063356	0.29909	0.63986	0.11329	0.070484	0.2987	1.2977
47.90764791	0.048448	0.45677	0.26866	0.020227	0.023879	-0.066556	0.067304	0.026502	0.45728	0.17496	-0.069405	-0.027106	0.21933	0.11558	0.083828	0.060324	0.016379	0.45737	0.16718	0.27699	-0.040039	0.20791	0.11862	0.30043	0.16557	0.41118	0.33131	0.054626	0.83222	-0.021359	0.18523	0.049792	1.4335	0.17423	0.13985	0.0019866	0.35234	0.73464	0.0025851	-0.047632	0.13483	0.55168	-0.026806	0.35667	0.68566	0.095516	0.16126	0.26583	1.3168
47.97979798	0.039796	0.45996	0.24978	0.035314	0.019077	-0.055377	0.061272	0.054187	0.41861	0.14653	-0.055912	0.012123	0.1963	0.14317	0.083088	0.061664	0.046169	0.4265	0.12277	0.24035	-0.054072	0.14896	0.087738	0.28816	0.14899	0.39002	0.31463	0.049518	0.72732	0.011426	0.21715	0.068734	1.5373	0.16391	0.13513	-0.0063093	0.40661	0.90151	0.011133	-0.031633	0.14813	0.58646	0.04564	0.4258	0.72762	0.085376	0.20204	0.25646	1.2702
48.05194805	0.017862	0.4278	0.23281	0.040769	0.014335	-0.043975	0.089263	0.06451	0.40164	0.1462	-0.041461	0.039851	0.20528	0.14129	0.061199	0.062587	0.040806	0.40684	0.08622	0.21976	-0.059405	0.10353	0.062257	0.28194	0.15536	0.38017	0.32245	0.071772	0.68579	-0.00052902	0.23276	0.076363	1.574	0.15165	0.097636	-0.019021	0.42134	1.0983	0.015558	-0.040228	0.16114	0.57903	0.069617	0.43468	0.75224	0.051144	0.21329	0.2635	1.2854
48.12409812	-0.0020064	0.38901	0.18456	0.045285	0.047331	-0.046234	0.10796	0.059626	0.41303	0.15744	-0.035037	0.022687	0.19435	0.14163	0.036185	0.070248	0.051653	0.42286	0.053421	0.1906	-0.057175	0.082283	0.045811	0.30282	0.16982	0.37525	0.3538	0.1111	0.72092	-0.024668	0.22473	0.054126	1.613	0.11874	0.067467	-0.0094793	0.39216	1.2537	0.018958	-0.025817	0.17751	0.51608	0.046344	0.3607	0.79323	0.031938	0.19196	0.2454	1.3524
48.1962482	-0.026731	0.36574	0.17154	0.020661	0.1064	-0.054345	0.089758	0.045973	0.40391	0.12473	-0.034334	-0.019603	0.15576	0.15995	0.026748	0.083992	0.080561	0.38584	0.062765	0.16736	-0.074087	0.053281	0.028403	0.3083	0.19266	0.35746	0.37196	0.12793	0.74982	-0.027797	0.21947	0.044443	1.7174	0.098448	0.054437	-0.0019111	0.36999	1.3857	0.010809	0.047331	0.20382	0.47856	-0.029924	0.26791	0.78527	0.030669	0.17236	0.21644	1.328
48.26839827	-0.043209	0.33469	0.19248	0.0041154	0.12161	-0.05343	0.074878	0.038996	0.3782	0.096344	-0.047139	-0.02843	0.13649	0.1722	0.029626	0.088434	0.11143	0.29926	0.090671	0.13176	-0.060285	0.017608	0.013859	0.30589	0.19922	0.32355	0.36924	0.1221	0.71279	-0.031452	0.21057	0.074901	1.7728	0.075702	0.047864	-0.019385	0.3493	1.4574	0.0097979	0.10397	0.20407	0.49075	-0.059772	0.2494	0.70964	0.018609	0.18231	0.21996	1.2442
48.34054834	-0.047418	0.31135	0.2283	0.0055324	0.092616	-0.054753	0.051835	0.039903	0.34493	0.10172	-0.044355	-0.005969	0.15249	0.15041	0.041182	0.094038	0.10714	0.25934	0.1034	0.082191	-0.035109	-0.0048237	0.011189	0.3311	0.20769	0.28607	0.35877	0.11303	0.64385	-0.033449	0.19919	0.093971	1.6775	0.057478	0.041882	-0.027465	0.35712	1.4544	-0.00043745	0.13375	0.20607	0.50369	-0.02953	0.28209	0.61318	0.0036125	0.19895	0.24426	1.2665
48.41269841	-0.045989	0.28779	0.25898	-0.010336	0.076415	-0.051163	0.030022	0.0082456	0.31361	0.098128	-0.039116	-0.019734	0.17603	0.10084	0.043199	0.086363	0.10158	0.26584	0.088159	0.067662	-0.028042	-0.0070683	0.010995	0.42529	0.23382	0.26807	0.32364	0.10318	0.59891	-0.044142	0.21772	0.11466	1.5316	0.072087	0.031793	-0.026372	0.3619	1.44	-0.020568	0.13412	0.22529	0.54022	-0.031479	0.35003	0.53355	-0.034567	0.18875	0.22496	1.3786
48.48484848	-0.039506	0.2491	0.24309	-0.033028	0.063931	-0.063397	0.032115	-0.032152	0.31812	0.082556	-0.037652	-0.021059	0.1852	0.05625	0.036214	0.076541	0.091212	0.27159	0.056595	0.083811	-0.020446	0.0021254	0.020969	0.5222	0.29528	0.26325	0.29754	0.078633	0.65542	-0.031748	0.22934	0.13366	1.5166	0.11075	0.029635	-0.035498	0.33003	1.4152	-0.021579	0.13627	0.19313	0.58418	-0.03286	0.41418	0.51889	-0.094216	0.1682	0.19018	1.3489
48.55699856	-0.038102	0.22016	0.20282	-0.013446	0.075027	-0.069634	0.044919	-0.016763	0.31711	0.066892	-0.023222	0.0098123	0.17279	0.050568	0.020155	0.061133	0.072667	0.26695	0.038329	0.074172	0.021652	0.02495	0.049775	0.55297	0.41074	0.2689	0.31165	0.10138	0.76757	-0.035991	0.21759	0.12926	1.5858	0.12311	0.053549	-0.045192	0.29652	1.3497	0.0081206	0.15678	0.14748	0.56567	-0.027212	0.4504	0.50064	-0.10907	0.14212	0.18412	1.2743
48.62914863	-0.018055	0.1947	0.21015	-0.0064004	0.098405	-0.04473	0.05635	0.0099261	0.28689	0.069538	-0.0073274	0.023876	0.13096	0.059182	0.0015534	0.040662	0.076079	0.27306	0.04784	0.064341	0.14809	0.069518	0.074912	0.54151	0.4822	0.25176	0.35514	0.1537	0.74587	-0.043046	0.20093	0.1196	1.5495	0.10027	0.072301	-0.039056	0.28338	1.3017	0.049412	0.16393	0.1035	0.53949	-0.030364	0.42588	0.47001	-0.083575	0.094592	0.20738	1.2513
48.7012987	0.0047992	0.16519	0.24339	-0.037028	0.1138	-0.020747	0.050818	-0.010425	0.26973	0.075491	-0.00069946	0.021673	0.090358	0.0704	-0.014829	0.018418	0.097278	0.2881	0.057573	0.079211	0.38524	0.12578	0.093812	0.50046	0.47978	0.21154	0.36235	0.17016	0.72104	-0.029953	0.18761	0.10963	1.4008	0.12548	0.062399	-0.022098	0.27472	1.3342	0.086878	0.16242	0.070205	0.56766	-0.050359	0.36814	0.45122	-0.053179	0.080387	0.21939	1.1918
48.77344877	0.011268	0.14975	0.25382	-0.049963	0.10821	-0.0039555	0.03958	-0.026412	0.27376	0.083801	0.00081257	0.033919	0.066015	0.088165	-0.036899	-0.0058684	0.11255	0.26342	0.066021	0.074332	0.58808	0.13453	0.092729	0.49271	0.49568	0.19273	0.33804	0.18675	0.72864	-0.027421	0.19293	0.10095	1.3357	0.22114	0.03913	-0.011246	0.24699	1.3654	0.098171	0.13926	0.074999	0.57586	-0.032553	0.36221	0.44374	-0.034732	0.069419	0.20575	1.162
48.84559885	0.011194	0.16925	0.2195	-0.043279	0.094247	0.013981	0.023847	-0.020343	0.26785	0.096704	-0.0072063	0.047163	0.028771	0.10256	-0.033581	-0.012868	0.082885	0.20599	0.084632	0.06419	0.66238	0.12356	0.080374	0.50096	0.54567	0.20205	0.30509	0.22747	0.78126	-0.037033	0.18071	0.10326	1.261	0.28852	0.051138	-0.00075767	0.21505	1.2993	0.088563	0.15644	0.13694	0.54877	0.012841	0.35601	0.45049	-0.029383	0.016298	0.18574	1.2038
48.91774892	-0.015318	0.1634	0.17315	-0.028693	0.083299	0.013844	-0.0073872	-0.0077983	0.2465	0.10045	-0.004575	0.058821	0.0047371	0.097237	-0.019811	-0.0023783	0.048861	0.18239	0.10978	0.039477	0.6519	0.13838	0.068122	0.50978	0.56578	0.19061	0.26916	0.26369	0.84336	-0.050065	0.15128	0.090484	1.1528	0.29972	0.10023	0.0027977	0.1835	1.2293	0.061753	0.24046	0.18465	0.54534	0.025935	0.31833	0.44964	-0.04141	0.035154	0.18628	1.3165
48.98989899	-0.021493	0.1112	0.12006	-0.040637	0.038299	-0.0063413	-0.030337	0.0068096	0.24408	0.093738	1.95E-05	0.070918	0.034558	0.085443	-0.0090837	-0.0038831	0.056702	0.20346	0.12158	0.020313	0.64461	0.13024	0.065179	0.57143	0.54556	0.17427	0.23341	0.2449	0.89049	-0.046261	0.12705	0.073333	1.0221	0.28685	0.13846	0.003549	0.16561	1.3022	0.048885	0.28768	0.18156	0.538	0.038706	0.3265	0.43254	-0.037719	0.11503	0.22634	1.3899
49.06204906	0.0084311	0.063406	0.12768	-0.056793	0.012947	-0.038554	-0.024709	0.0075078	0.26414	0.074735	-0.022528	0.080843	0.066076	0.071335	0.0034788	-0.019718	0.077399	0.20153	0.11193	0.038469	0.7114	0.088592	0.069489	0.65114	0.5118	0.17831	0.21527	0.21511	0.91578	-0.042371	0.12029	0.075236	0.94644	0.26697	0.13953	0.019782	0.16966	1.4608	0.062006	0.29125	0.17959	0.52793	0.014886	0.32174	0.39324	-0.039682	0.17538	0.23878	1.3184
49.13419913	0.019077	0.065723	0.18008	-0.06877	0.026697	-0.046796	-0.005286	0.0049622	0.27088	0.047923	-0.035622	0.078485	0.058261	0.045953	0.014509	-0.013893	0.083559	0.18696	0.092984	0.055417	0.85715	0.060792	0.059054	0.66663	0.4968	0.18049	0.22269	0.20223	0.92649	-0.039334	0.12292	0.07324	0.93452	0.25228	0.13336	0.019598	0.15611	1.6141	0.083932	0.2819	0.19027	0.49849	9.90E-05	0.30783	0.32807	-0.0408	0.25108	0.18963	1.268
49.20634921	0.011862	0.092031	0.1799	-0.055922	0.034534	-0.014692	-0.0088441	0.017927	0.23594	0.01785	-0.012004	0.059815	0.046977	0.015495	-0.011157	0.016549	0.079531	0.16736	0.068008	0.042684	0.98322	0.077945	0.048724	0.65601	0.48864	0.17232	0.22486	0.20368	1.0351	-0.035139	0.11496	0.060479	0.89441	0.23563	0.15217	0.012225	0.12929	1.7502	0.12172	0.27086	0.21321	0.47564	-0.0010355	0.28737	0.26414	-0.035837	0.31553	0.15259	1.2922
49.27849928	0.022395	0.14058	0.19301	-0.033913	0.04847	0.029061	-0.024996	0.0071063	0.19431	0.020073	0.025574	0.032428	0.06658	0.00021572	-0.03807	0.029745	0.10327	0.13726	0.016509	0.028803	0.98748	0.11145	0.074645	0.67247	0.45872	0.16127	0.20418	0.17272	1.3894	-0.035295	0.095883	0.062677	0.84602	0.21177	0.18774	0.028981	0.10677	1.8667	0.15953	0.27196	0.21925	0.52049	0.0084827	0.28006	0.25722	-0.046372	0.27996	0.17418	1.278
49.35064935	0.030175	0.14444	0.21189	-0.0095129	0.071796	0.032209	-0.056848	-0.0071999	0.18123	0.070301	0.039791	0.021119	0.10725	-0.0016426	-0.035829	0.022464	0.14194	0.10069	0.013294	0.019305	0.9557	0.12275	0.081532	0.67286	0.4349	0.17027	0.1969	0.12544	1.7667	-0.03324	0.093245	0.066995	0.83113	0.19923	0.20161	0.043397	0.074488	1.8906	0.15845	0.27559	0.17912	0.58585	0.023497	0.26797	0.28519	-0.060165	0.2376	0.17008	1.1647
49.42279942	0.030025	0.10489	0.20916	0.017275	0.071004	-0.0086792	-0.084934	-0.014661	0.19158	0.082334	0.01748	0.015034	0.11901	0.0043468	-0.015104	0.035794	0.14773	0.074378	0.041784	-0.0052167	0.95344	0.11176	0.060942	0.62712	0.44162	0.19618	0.208	0.11814	1.9773	-0.011157	0.095457	0.054103	0.79442	0.19961	0.19102	0.029837	0.052213	1.8361	0.15442	0.29262	0.17406	0.65459	-0.0027398	0.25342	0.31572	-0.080616	0.22811	0.17186	1.0502
49.49494949	0.027327	0.067679	0.17446	0.026674	0.065001	-0.039746	-0.089172	-0.026045	0.20843	0.04299	0.0055089	0.022431	0.10748	-0.0063082	0.00028993	0.050178	0.11245	0.091261	0.033954	-0.017703	0.90625	0.096462	0.040026	0.57004	0.46369	0.2088	0.21543	0.12917	2.072	0.042147	0.12547	0.04636	0.68061	0.17573	0.17322	0.027721	0.070763	1.759	0.19261	0.31345	0.1702	0.72758	-0.028358	0.24231	0.3859	-0.12917	0.1909	0.1933	1.0248
49.56709957	0.006154	0.041716	0.15857	-0.0022441	0.077214	-0.051005	-0.074091	-0.038605	0.2325	0.024862	-0.0055935	0.037797	0.093079	-0.014614	0.022251	0.043011	0.082009	0.13286	0.018133	-0.017375	0.83975	0.075333	0.022359	0.5675	0.47545	0.20199	0.21079	0.13669	2.1509	0.072578	0.17294	0.059164	0.54393	0.13806	0.16473	0.029132	0.1262	1.6856	0.21246	0.30646	0.15114	0.75063	-0.018605	0.21684	0.44947	-0.15456	0.1477	0.17534	1.0703
49.63924964	0.0037569	0.024996	0.17381	-0.060133	0.07102	-0.061971	-0.031635	-0.058494	0.22762	0.060921	0.0022781	0.046209	0.081919	-0.001739	0.018627	0.057648	0.06095	0.16251	0.0082993	-0.024158	0.79872	0.042092	0.0079364	0.57414	0.48057	0.19478	0.19891	0.13528	2.2428	0.024791	0.19008	0.080058	0.4865	0.10175	0.15854	0.018146	0.15979	1.6189	0.16332	0.25694	0.10529	0.76268	0.0050087	0.21847	0.47453	-0.13929	0.10861	0.15918	1.1065
49.71139971	0.019887	0.013614	0.18341	-0.073896	0.057161	-0.053974	-0.014641	-0.049489	0.19266	0.086098	0.025739	0.055804	0.090876	0.0056838	0.018243	0.067748	0.051633	0.20993	0.025001	-0.00087373	0.74363	0.021795	-0.020948	0.57573	0.4407	0.19561	0.18213	0.13257	2.2677	-0.024811	0.21039	0.095042	0.53275	0.089709	0.13366	0.0031596	0.15961	1.4961	0.15125	0.24091	0.034176	0.74514	-0.0023567	0.26428	0.47297	-0.12718	0.097144	0.16692	1.0894
49.78354978	0.01655	0.010343	0.16731	-0.053739	0.049588	-0.05109	-0.048063	-0.017202	0.14607	0.068296	0.037863	0.068692	0.11274	-0.00011933	0.027807	0.070057	0.074185	0.24053	0.064815	0.033569	0.69898	-0.0042383	-0.051435	0.57657	0.3763	0.20128	0.16741	0.12869	2.208	-0.038435	0.27455	0.088213	0.53387	0.080758	0.10939	-0.0022554	0.26183	1.4269	0.18515	0.31707	-0.0073783	0.65098	0.0046354	0.29459	0.41988	-0.13468	0.12792	0.17511	1.0613
49.85569986	-0.011472	0.019951	0.17943	-0.057112	0.023235	-0.058821	-0.066432	-0.012041	0.13057	0.059286	0.041829	0.081385	0.1402	-0.0082091	0.0055552	0.090785	0.090168	0.22116	0.10027	0.048795	0.69641	-0.030105	-0.051965	0.58376	0.34469	0.19299	0.15321	0.14487	2.119	-0.052558	0.32294	0.085493	0.48222	0.062749	0.082405	-0.011158	0.5303	1.4455	0.18166	0.37773	0.048174	0.60388	9.93E-05	0.30837	0.41255	-0.14728	0.11983	0.17524	1.076
49.92784993	-0.018499	-0.0016406	0.21473	-0.073716	0.021322	-0.051923	-0.064801	-0.044259	0.13532	0.067576	0.053027	0.08618	0.16236	-0.01789	-0.012795	0.10041	0.091957	0.21034	0.12141	0.028251	0.66434	-0.028833	-0.039506	0.5985	0.32821	0.17176	0.16758	0.1589	2.2761	-0.047843	0.3149	0.093034	0.41598	0.071729	0.07249	-0.001414	0.72885	1.4205	0.14281	0.36945	0.10851	0.60903	-0.038005	0.32795	0.43418	-0.14115	0.095372	0.15948	1.0909
50	-0.021964	-0.029655	0.22559	-0.0461	0.036627	-0.037123	-0.062202	-0.071182	0.13692	0.079497	0.046802	0.085519	0.18101	-0.015273	-0.012322	0.068897	0.10016	0.21124	0.091229	0.018303	0.61762	-0.0087487	-0.040126	0.56841	0.29485	0.16374	0.17581	0.1689	2.6452	-0.01182	0.28951	0.096812	0.38596	0.13118	0.098132	0.034471	0.79807	1.32	0.11994	0.35759	0.11023	0.61936	-0.065946	0.34279	0.43282	-0.098973	0.14097	0.14192	1.1176
50.07215007	0.0091756	-0.018179	0.2141	0.0019131	0.026091	-0.039125	-0.064528	-0.087086	0.14298	0.10022	0.04485	0.076475	0.1922	-0.0042745	-0.0037103	0.042897	0.094825	0.19368	0.050224	0.03621	0.58417	0.0082624	-0.048536	0.51775	0.2615	0.16852	0.18477	0.16802	2.9001	0.020544	0.26372	0.080526	0.37134	0.2184	0.13002	0.062946	0.83005	1.2842	0.13184	0.37948	0.11204	0.62133	-0.07196	0.35927	0.45363	-0.059125	0.17817	0.14667	1.1615
50.14430014	0.043861	0.017292	0.20693	0.025556	0.006723	-0.057935	-0.069366	-0.084727	0.17145	0.13703	0.070651	0.066162	0.19172	-0.0068574	0.018435	0.051909	0.10659	0.15901	0.038138	0.055292	0.52144	0.010595	-0.026553	0.501	0.24327	0.18024	0.19658	0.18275	2.9477	0.035477	0.24643	0.076721	0.3111	0.26933	0.15262	0.059016	0.84108	1.4301	0.14734	0.39505	0.12731	0.59179	-0.07469	0.36938	0.4834	-0.030957	0.22114	0.12211	1.1413
50.21645022	0.027902	0.020612	0.19534	0.00061793	0.013573	-0.060688	-0.058813	-0.07085	0.17682	0.14365	0.076115	0.080211	0.18917	-0.030341	0.13194	0.05876	0.1017	0.1286	0.052018	0.12306	0.47103	0.017401	0.01654	0.52254	0.2538	0.20169	0.20989	0.18763	2.9061	0.015195	0.22574	0.080585	0.28303	0.30529	0.16184	0.030111	0.8105	1.5713	0.17023	0.4237	0.15442	0.54597	-0.080581	0.34987	0.45944	0.013534	0.25705	0.1149	1.0709
50.28860029	0.012303	-0.021645	0.19968	-0.030587	0.0135	-0.07132	-0.067586	-0.067111	0.16844	0.10205	0.061035	0.093521	0.1863	-0.038609	0.38714	0.057996	0.051572	0.12239	0.065877	0.25721	0.44614	0.031033	0.041479	0.52441	0.29455	0.21721	0.23076	0.15567	2.9305	0.0084698	0.21192	0.067912	0.27047	0.34619	0.15726	0.0090366	0.75601	1.5786	0.18171	0.51178	0.16375	0.52686	-0.056143	0.34054	0.41517	0.029132	0.2386	0.13812	1.0792
50.36075036	0.015166	-0.050661	0.21927	-0.026051	0.0040711	-0.073534	-0.07117	-0.048027	0.17295	0.072384	0.05856	0.088143	0.16591	-0.044804	0.65373	0.064504	0.0058838	0.13417	0.078247	0.39352	0.40691	0.059421	0.042654	0.51296	0.33087	0.23277	0.24508	0.10295	2.8438	0.0023932	0.21686	0.045783	0.28284	0.3903	0.13104	0.0039354	0.74602	1.5099	0.16997	0.60992	0.15173	0.51502	-0.024688	0.32663	0.36458	0.014266	0.19883	0.13638	1.1297
50.43290043	0.017163	-0.039431	0.22937	-0.018088	0.011962	-0.048132	-0.052012	-0.030879	0.15055	0.060778	0.060479	0.091733	0.131	-0.065386	0.81666	0.082834	-0.012325	0.10929	0.054815	0.46585	0.39294	0.083787	0.042448	0.50803	0.35927	0.24829	0.2722	0.087021	2.6524	-0.0054779	0.20175	0.039896	0.29745	0.4271	0.086806	-0.016338	0.72813	1.4995	0.17148	0.67622	0.16835	0.49294	-0.040367	0.3339	0.28185	0.0070943	0.1515	0.12804	1.0904
50.50505051	0.020346	-0.023449	0.2209	-0.023804	0.019151	-0.036835	-0.034727	-0.017143	0.12077	0.069216	0.069271	0.10519	0.12109	-0.068658	0.91812	0.10838	-0.019135	0.04885	0.025978	0.44866	0.36748	0.08604	0.059277	0.48734	0.35781	0.25826	0.29251	0.10544	2.568	0.0015124	0.17004	0.050561	0.2794	0.437	0.058042	-0.038038	0.65481	1.496	0.24899	0.70317	0.18903	0.50402	-0.064378	0.3393	0.24876	0.015866	0.12068	0.14435	1.0103
50.57720058	-0.0099535	0.0088494	0.1896	-0.041683	0.042949	-0.048154	-0.013699	-0.0073797	0.15183	0.06903	0.088676	0.10626	0.13777	-0.069039	0.95904	0.096731	0.0057967	0.024071	-0.0058725	0.38444	0.33177	0.094363	0.10732	0.46239	0.32827	0.29616	0.3105	0.098609	2.566	0.017542	0.15977	0.058929	0.26419	0.43042	0.05142	-0.057083	0.60208	1.4714	0.33216	0.68722	0.14962	0.56658	-0.043629	0.33038	0.24777	0.018257	0.14165	0.14634	0.97349
50.64935065	-0.038173	0.0396	0.14989	-0.077334	0.032951	-0.055566	-0.013215	-0.012206	0.18428	0.039637	0.10269	0.10488	0.13912	-0.082497	0.95064	0.084617	0.034209	0.027456	-0.054033	0.34374	0.34817	0.13014	0.18316	0.47745	0.32396	0.33344	0.34655	0.086382	2.4973	0.031663	0.15265	0.049608	0.26609	0.4065	0.049187	-0.054125	0.58324	1.4984	0.36186	0.69048	0.13424	0.61263	-0.020002	0.31724	0.20709	0.031929	0.16624	0.080986	0.9267
50.72150072	-0.046106	0.052045	0.10348	-0.091547	-0.016108	-0.041077	-0.023541	-0.03025	0.18674	0.023675	0.10114	0.083055	0.13112	-0.091044	0.88255	0.10343	0.039504	0.03641	-0.051152	0.32581	0.35201	0.18336	0.23147	0.49955	0.32869	0.35213	0.37663	0.10646	2.42	0.019901	0.1343	0.040597	0.23877	0.39647	0.030857	-0.025294	0.56236	1.5646	0.34864	0.75143	0.15938	0.58247	-0.023757	0.29581	0.1621	0.061906	0.15731	0.039611	0.90355
50.79365079	-0.052863	0.061894	0.084159	-0.072257	-0.005555	0.00023709	-0.024647	-0.031664	0.17845	0.024672	0.086258	0.044855	0.13074	-0.074694	0.82731	0.10506	0.027804	0.038653	-0.014513	0.30093	0.30846	0.22588	0.21891	0.46327	0.33011	0.35922	0.38528	0.10177	2.3681	-0.026735	0.11844	0.023769	0.19904	0.37744	0.0065035	-0.017267	0.51801	1.5543	0.3153	0.81267	0.19027	0.52965	-0.061313	0.28696	0.18053	0.093443	0.10808	0.070399	0.85654
50.86580087	-0.068952	0.082521	0.10289	-0.064742	0.034321	0.010994	-0.017134	-0.031045	0.16264	0.026598	0.062778	0.024827	0.12058	-0.041453	0.82066	0.11122	0.024239	0.031742	-0.042929	0.26656	0.24607	0.24602	0.21234	0.39972	0.35304	0.386	0.39425	0.057149	2.2766	-0.044432	0.11355	-0.012927	0.19838	0.33634	-0.019725	-0.021423	0.48182	1.454	0.29598	0.76454	0.24128	0.51868	-0.069339	0.29478	0.22377	0.11445	0.099158	0.09227	0.82924
50.93795094	-0.054383	0.11866	0.10609	-0.042942	0.049729	-0.020108	-0.012924	-0.025793	0.1512	0.050186	0.033786	0.027331	0.11007	-0.0057032	0.78547	0.12222	0.079906	0.0084641	-0.089263	0.25687	0.19101	0.26117	0.25081	0.36414	0.35722	0.42091	0.43905	0.04854	2.2251	-0.044091	0.096756	-0.039724	0.25401	0.30127	-0.021861	-0.023826	0.46231	1.4301	0.27462	0.65059	0.27251	0.5726	-0.018964	0.29803	0.22014	0.0981	0.11932	0.040572	0.83504
51.01010101	-0.033604	0.12341	0.080122	0.00041123	0.040966	-0.057808	-0.0094623	-0.0089057	0.14051	0.067535	0.027146	0.04055	0.12918	0.021497	0.72776	0.14377	0.14196	-0.00096098	-0.086509	0.28465	0.17613	0.26163	0.25925	0.31659	0.3072	0.42116	0.46357	0.097831	2.1694	-0.032695	0.07615	-0.018878	0.36071	0.3051	0.0026963	-0.032111	0.44736	1.4823	0.25654	0.58496	0.2714	0.55223	0.013096	0.27671	0.17632	0.06136	0.096287	-0.019507	0.79109
51.08225108	-0.031557	0.10899	0.0939	0.022692	0.020239	-0.078736	-0.010232	-0.0012602	0.13987	0.052339	0.051506	0.060614	0.1403	0.028679	0.65417	0.1726	0.14458	-0.010044	-0.08678	0.29495	0.19654	0.26046	0.24285	0.26337	0.24216	0.40713	0.4318	0.085739	2.0289	-0.023403	0.063417	0.0099911	0.42985	0.34992	0.029251	-0.031818	0.44182	1.452	0.22173	0.57515	0.29336	0.4738	0.031808	0.25676	0.11466	0.05607	0.03509	-0.0068365	0.75077
51.15440115	-0.041371	0.078343	0.21245	0.034222	0.00080396	-0.053379	-0.0068438	-0.0054426	0.14751	0.029359	0.085076	0.066571	0.13069	0.011407	0.59301	0.17837	0.098817	0.010678	-0.1042	0.25315	0.19617	0.25873	0.26477	0.25925	0.21904	0.39771	0.38858	0.027314	1.9025	-0.011634	0.075845	0.021661	0.49635	0.40584	0.034688	-0.046143	0.43549	1.4093	0.19997	0.58716	0.37915	0.48416	0.066091	0.29228	0.049374	0.060133	0.035219	0.02363	0.78473
51.22655123	-0.048642	0.049875	0.47978	0.033555	-0.014264	-0.028787	-0.0093964	-0.0013021	0.13058	0.0098222	0.10135	0.073864	0.11242	-0.005161	0.55382	0.14691	0.063766	0.023899	-0.085506	0.23138	0.15518	0.22529	0.29552	0.32971	0.25143	0.39399	0.37128	0.013389	1.8488	0.01899	0.078457	0.026019	0.59235	0.42751	0.03382	-0.064052	0.41044	1.4819	0.20121	0.57873	0.46159	0.52282	0.089967	0.31952	0.013982	0.061103	0.072956	0.023007	0.83992
51.2987013	-0.027938	0.030138	0.825	0.023779	-0.01964	-0.054629	-0.021869	0.00041419	0.10106	-0.0038051	0.097682	0.080821	0.079702	0.01455	0.51043	0.10611	0.10017	0.013568	-0.045895	0.25751	0.11401	0.18185	0.2723	0.42854	0.26965	0.39839	0.37955	0.0020355	1.8316	0.062272	0.067493	0.033886	0.64515	0.41999	0.040752	-0.064362	0.37774	1.5868	0.19077	0.54268	0.55609	0.50485	0.059704	0.31177	-0.00062359	0.11202	0.096406	0.034351	0.84001
51.37085137	0.004461	0.02718	1.1554	0.053099	-0.010155	-0.052703	-0.027711	-0.0088947	0.10129	-0.0017885	0.093029	0.09887	0.05349	0.038687	0.46882	0.086649	0.19547	0.030162	-0.021003	0.26511	0.091644	0.16294	0.23861	0.46674	0.2604	0.38987	0.39788	-0.01734	1.7891	0.029101	0.067233	0.038955	0.65846	0.39817	0.060455	-0.069347	0.34747	1.5924	0.17506	0.52028	0.60741	0.47968	0.042049	0.29172	-0.0020139	0.16275	0.14948	0.084927	0.84213
51.44300144	0.014987	0.04728	1.4021	0.095498	-0.00017062	-0.031852	-0.0061361	-0.015194	0.12427	0.010694	0.074212	0.11208	0.058668	0.043022	0.43073	0.072252	0.31223	0.053353	-0.010946	0.23109	0.089681	0.16798	0.22104	0.41573	0.22525	0.38116	0.4109	-0.02985	1.7435	0.020082	0.04084	0.019863	0.68589	0.4439	0.08026	-0.078729	0.30597	1.5289	0.17017	0.47193	0.55644	0.39483	0.061253	0.27306	0.034103	0.16494	0.19273	0.083485	0.88374
51.51515152	-0.0023421	0.046249	1.5048	0.10636	0.008907	0.015137	0.020776	0.0014566	0.15127	0.027495	0.052477	0.097765	0.06189	0.02559	0.40737	0.053032	0.38945	0.058669	-0.0071337	0.20326	0.09969	0.17007	0.1966	0.37298	0.17153	0.37982	0.41526	-0.023641	1.786	0.041709	-0.011928	0.01953	0.73158	0.5871	0.087244	-0.079475	0.28768	1.4877	0.16955	0.42192	0.51049	0.34911	0.065614	0.25814	0.055237	0.13214	0.15405	0.050701	0.93879
51.58730159	-0.01845	0.052446	1.5041	0.099846	0.02684	0.097387	0.0029786	0.039453	0.13841	0.015581	0.038495	0.080866	0.072917	0.0048956	0.39896	0.025592	0.44811	0.049618	-0.012639	0.20427	0.085555	0.17786	0.15376	0.36964	0.15458	0.36669	0.4126	-0.028079	1.8933	0.087337	-0.022239	0.03151	0.73833	0.69802	0.063753	-0.082116	0.30679	1.4306	0.14205	0.41134	0.53584	0.36448	0.064601	0.2627	0.05137	0.087007	0.14678	0.069232	0.92584
51.65945166	-0.0035283	0.083678	1.5007	0.1036	0.017771	0.15721	-0.02268	0.097833	0.12815	-0.003191	0.021965	0.07612	0.096687	-0.0045644	0.37255	0.0047574	0.45935	0.050199	-0.0059275	0.20573	0.085486	0.19236	0.14377	0.36287	0.18617	0.36805	0.4202	-0.016253	1.9048	0.17543	0.012037	0.028106	0.70651	0.71225	0.040439	-0.090408	0.36712	1.3434	0.10436	0.39033	0.51505	0.35955	0.10198	0.24209	0.064007	0.053211	0.15555	0.11462	0.8715
51.73160173	0.026842	0.10485	1.5549	0.10567	-0.004655	0.19021	-0.019288	0.20222	0.16071	0.0007943	0.0048446	0.076807	0.098059	0.0099138	0.32783	0.0090411	0.42936	0.062512	0.0036985	0.16993	0.094	0.19088	0.15964	0.32604	0.23492	0.37699	0.44258	-0.012758	1.9336	0.20982	0.049686	0.035721	0.70398	0.69025	0.022805	-0.089197	0.45316	1.2696	0.079717	0.36422	0.47959	0.35407	0.16409	0.19092	0.11415	0.046941	0.12498	0.15997	0.88239
51.8037518	0.037191	0.13506	1.5385	0.078753	-0.016546	0.19606	-0.0092302	0.39464	0.20426	0.013771	0.0089866	0.071047	0.066789	0.032577	0.31711	0.02595	0.38609	0.070891	-0.0044755	0.12368	0.11963	0.17997	0.19145	0.29084	0.28854	0.37126	0.45134	-0.033155	2.093	0.18267	0.069639	0.044103	0.68509	0.65754	0.0011908	-0.096957	0.52088	1.3086	0.065522	0.36317	0.49294	0.3512	0.15878	0.15273	0.15108	0.049704	0.11085	0.18496	0.88222
51.87590188	0.019881	0.18373	1.4516	0.060776	-0.012806	0.1715	-0.0099307	0.60069	0.20031	0.027213	0.025979	0.065321	0.065871	0.015946	0.3263	0.051289	0.35526	0.047874	-0.030575	0.10389	0.16342	0.18805	0.2067	0.25477	0.32849	0.33361	0.42789	-0.054223	2.0535	0.16834	0.10081	0.047296	0.65143	0.60766	-0.0093365	-0.094836	0.54711	1.3609	0.053135	0.35909	0.51246	0.3596	0.13592	0.13299	0.14001	0.094092	0.090855	0.2055	0.8383
51.94805195	-0.0040181	0.23426	1.3903	0.086	-0.023299	0.16206	-0.0024457	0.67681	0.16372	0.010224	0.038469	0.046095	0.10338	-0.0093778	0.314	0.060633	0.31417	0.019387	-0.060092	0.1044	0.1861	0.19815	0.16546	0.20897	0.35717	0.26932	0.36969	-0.028328	1.8249	0.14782	0.085345	0.051843	0.61305	0.54658	-0.014094	-0.088577	0.5472	1.3028	0.038656	0.33642	0.50613	0.40445	0.13417	0.12723	0.12348	0.1411	0.047568	0.23728	0.82728
52.02020202	-0.0086397	0.25023	1.3767	0.095191	-0.02455	0.16919	-0.016503	0.68336	0.14362	-0.0010189	0.046924	0.039071	0.11209	-0.0085384	0.3174	0.048956	0.24616	0.029924	-0.044614	0.10291	0.19563	0.18662	0.11068	0.1822	0.37068	0.20382	0.31814	0.011268	1.7126	0.14122	0.048482	0.05048	0.57465	0.50364	-0.021079	-0.093053	0.52337	1.2737	0.054099	0.3023	0.47053	0.47302	0.15586	0.11549	0.13296	0.15463	0.049617	0.20363	0.81345
52.09235209	0.01813	0.20481	1.365	0.067865	-0.011312	0.16735	-0.040988	0.69088	0.14326	-2.23E-05	0.064961	0.053758	0.099554	-0.010012	0.33335	0.0776	0.19195	0.043938	0.012732	0.070216	0.20315	0.16653	0.11582	0.1654	0.34604	0.16753	0.24266	0.013411	1.6455	0.13669	0.045978	0.028034	0.54598	0.49783	-0.022176	-0.089282	0.48964	1.2973	0.07519	0.28265	0.44562	0.45849	0.17781	0.099872	0.13549	0.10606	0.047931	0.14425	0.7738
52.16450216	0.03887	0.14543	1.3143	0.051413	-0.011654	0.18793	-0.039682	0.71771	0.14167	0.013019	0.074716	0.064132	0.096184	-0.017154	0.33221	0.13189	0.21274	0.039244	0.055858	0.052633	0.19241	0.14506	0.14041	0.18842	0.29518	0.14693	0.1693	0.0087723	1.6035	0.1087	0.047176	-0.0020666	0.52798	0.52926	-0.01366	-0.077438	0.49994	1.2685	0.088001	0.27207	0.46922	0.41301	0.14366	0.12901	0.12801	0.044249	-0.00016891	0.1034	0.74337
52.23665224	0.026852	0.12957	1.2217	0.03993	-0.0076248	0.18278	-0.014413	0.69549	0.13336	0.024316	0.073257	0.053637	0.094167	-0.0088061	0.30523	0.15014	0.25439	0.044827	0.08494	0.039078	0.1865	0.14008	0.15862	0.21985	0.23622	0.15679	0.12629	0.0098766	1.6087	0.14338	0.064189	0.0027857	0.49275	0.61073	-0.024852	-0.0567	0.52121	1.1853	0.10183	0.26566	0.45381	0.37877	0.10733	0.16515	0.14495	0.022898	-0.036673	0.12627	0.7154
52.30880231	0.0049974	0.14077	1.1779	0.053718	0.0038741	0.13852	-0.011097	0.63718	0.090788	0.0098914	0.087873	0.038099	0.080119	0.00040577	0.29552	0.14403	0.29607	0.075484	0.064434	0.046392	0.19612	0.14545	0.18076	0.2222	0.18159	0.18372	0.11328	0.026592	1.601	0.19868	0.062026	0.029289	0.43226	0.68938	-0.041902	-0.055055	0.50052	1.1181	0.087816	0.24552	0.39042	0.37608	0.11285	0.19685	0.13344	0.010238	-0.026215	0.16681	0.71688
52.38095238	-0.023312	0.14503	1.163	0.067366	0.036	0.084195	-0.023527	0.5945	0.050297	0.0012447	0.095354	0.021196	0.078235	-0.0075955	0.30647	0.14366	0.2952	0.10807	0.022906	0.063646	0.20582	0.16366	0.20043	0.20132	0.14904	0.17718	0.10399	0.044031	1.694	0.20666	0.073694	0.059181	0.3634	0.76677	-0.052	-0.05703	0.46413	1.0979	0.064627	0.21667	0.34288	0.40339	0.15202	0.25094	0.10621	-0.020536	-0.027476	0.16381	0.70256
52.45310245	-0.012359	0.15751	1.1305	0.065858	0.060103	0.05427	-0.016259	0.57323	0.091807	-0.0040009	0.082146	0.0099411	0.10637	-0.023985	0.29861	0.15222	0.24465	0.13511	0.050143	0.057294	0.18742	0.18416	0.20058	0.1642	0.12348	0.14972	0.087765	0.020922	1.6231	0.14193	0.078511	0.071857	0.29457	0.90502	-0.04855	-0.052373	0.44956	1.0985	0.071308	0.18756	0.32118	0.42408	0.17253	0.28885	0.10374	-0.048207	-0.050696	0.15709	0.64723
52.52525253	-0.0088249	0.17181	1.077	0.073073	0.083614	0.053236	-0.01413	0.55913	0.15401	-0.017917	0.084796	0.020577	0.10964	-0.047242	0.26241	0.16104	0.18711	0.11618	0.070455	0.049522	0.14726	0.20813	0.19787	0.14689	0.11395	0.13362	0.077832	5.23E-05	1.529	0.04126	0.087996	0.04921	0.28194	1.0203	-0.058826	-0.059767	0.41191	1.0723	0.092354	0.18552	0.34077	0.43152	0.12786	0.26171	0.12277	-0.056387	-0.044923	0.15516	0.63517
52.5974026	-0.031804	0.1735	1.0216	0.11196	0.082482	0.082635	-0.0016404	0.53167	0.19463	-0.016929	0.081657	0.02146	0.073083	-0.062891	0.24343	0.178	0.18064	0.089237	0.064889	0.029345	0.12808	0.23692	0.18014	0.16069	0.11763	0.13025	0.073093	0.0062664	1.3963	0.019329	0.08043	0.038033	0.27924	1.0431	-0.072095	-0.084373	0.34287	0.99792	0.069114	0.17306	0.36671	0.47666	0.083715	0.21658	0.11709	-0.059842	-0.037294	0.14148	0.63555
52.66955267	-0.045218	0.16125	0.94512	0.1017	0.069891	0.095523	0.018372	0.50483	0.18991	-0.0021078	0.062939	0.023925	0.046219	-0.067714	0.24565	0.17821	0.20886	0.10766	0.06794	-0.0034628	0.14227	0.22852	0.14212	0.15404	0.13302	0.14077	0.081373	0.0025262	1.2816	0.055255	0.057395	0.04965	0.25362	1.0201	-0.080071	-0.081972	0.30546	0.9228	0.048158	0.14126	0.33624	0.5215	0.084114	0.20799	0.10383	-0.072888	-0.072009	0.11004	0.59304
52.74170274	-0.047508	0.1608	0.90933	0.064563	0.078249	0.089325	0.010682	0.47143	0.17098	0.0032376	0.056375	0.047101	0.047736	-0.074075	0.27247	0.1745	0.21237	0.13327	0.050034	-0.023074	0.15927	0.21764	0.13233	0.1478	0.17804	0.15046	0.1024	-0.018304	1.2963	0.073977	0.067522	0.054939	0.21895	0.98012	-0.063329	-0.072203	0.29908	0.88389	0.07392	0.13046	0.25049	0.52664	0.15111	0.20824	0.099012	-0.091901	-0.10683	0.11129	0.57853
52.81385281	-0.03113	0.1544	0.90585	0.067907	0.091792	0.074606	-0.016955	0.4414	0.17056	-0.01049	0.052288	0.054361	0.065562	-0.073517	0.27282	0.17653	0.19012	0.12423	0.024735	-0.028402	0.15463	0.21649	0.14421	0.17248	0.24498	0.14463	0.10779	-0.026073	1.3061	0.074603	0.075714	0.053548	0.1901	0.928	-0.043313	-0.07303	0.28769	0.86586	0.11634	0.18979	0.20658	0.48547	0.2325	0.16411	0.07711	-0.12289	-0.090574	0.12128	0.60145
52.88600289	-0.026276	0.11867	0.84187	0.09118	0.088759	0.080085	-0.0075045	0.42605	0.18974	-0.025015	0.044337	0.02888	0.073067	-0.058477	0.24893	0.18769	0.16722	0.08784	0.0083143	0.0015305	0.1494	0.21677	0.13101	0.18922	0.26007	0.11734	0.081801	-0.016978	1.2215	0.046494	0.045004	0.051481	0.18893	0.88325	-0.055112	-0.082899	0.28212	0.8449	0.14086	0.24189	0.2348	0.448	0.25602	0.11859	0.084827	-0.13514	-0.088685	0.1169	0.61
52.95815296	-0.037194	0.088231	0.77834	0.10861	0.065586	0.073281	0.020601	0.40343	0.1972	-0.02662	0.022961	0.009305	0.071313	-0.037337	0.26245	0.21255	0.14937	0.066562	0.015368	0.030731	0.17156	0.20909	0.11282	0.17612	0.22492	0.10915	0.063925	-0.0011785	1.0979	0.11554	0.037201	0.051003	0.20635	0.83286	-0.080758	-0.066508	0.28017	0.81461	0.15723	0.25939	0.29366	0.42417	0.21362	0.12483	0.13223	-0.12871	-0.084016	0.12335	0.57987
53.03030303	-0.035134	0.069456	0.75051	0.090225	0.052928	0.068239	0.021948	0.35797	0.19765	-0.040199	0.029201	-0.013115	0.075368	-0.042006	0.29983	0.22073	0.1263	0.075948	0.04252	0.024532	0.17111	0.19437	0.11689	0.16765	0.20239	0.13373	0.06798	0.012197	1.129	0.1824	0.030535	0.052607	0.2063	0.78708	-0.095418	-0.032599	0.2747	0.7961	0.1929	0.29511	0.36726	0.40306	0.18363	0.13299	0.16508	-0.089377	-0.087964	0.15168	0.5563
53.1024531	-0.029994	0.076026	0.70922	0.045607	0.048701	0.069708	0.021801	0.33094	0.19848	-0.02166	0.040639	-0.024734	0.077843	-0.047178	0.33781	0.20287	0.097403	0.069295	0.023119	0.016078	0.12429	0.19938	0.13059	0.18728	0.21092	0.17179	0.087247	-0.00055355	0.9973	0.19399	0.019246	0.05417	0.17813	0.7594	-0.094131	-0.01463	0.26005	0.86939	0.24895	0.31535	0.45343	0.34747	0.22203	0.10055	0.18096	-0.030911	-0.097988	0.18105	0.59235
53.17460317	-0.013547	0.10875	0.63754	0.031128	0.037572	0.059482	0.026526	0.32156	0.20185	0.0093352	0.040311	-0.011722	0.076763	-0.037316	0.36497	0.16372	0.10176	0.032404	-0.00026924	0.019053	0.097131	0.22511	0.15963	0.20494	0.22726	0.20824	0.092899	-0.04327	0.71181	0.16302	0.029572	0.044431	0.12735	0.74529	-0.090384	-0.019762	0.23549	0.96751	0.26298	0.3066	0.5135	0.31521	0.23285	0.081398	0.19269	-0.014094	-0.11461	0.17892	0.61
53.24675325	-0.0035647	0.11234	0.61399	0.048539	0.039395	0.063188	0.027462	0.30134	0.19583	0.0091892	0.036027	0.016875	0.064907	-0.038203	0.36116	0.14114	0.11826	-0.018657	-0.00060014	0.022636	0.09943	0.23672	0.17961	0.20942	0.25233	0.22995	0.096803	-0.055713	0.5075	0.17167	0.044557	0.016094	0.086609	0.71267	-0.091525	-0.0097212	0.22247	1.0319	0.24566	0.28519	0.54125	0.30428	0.17756	0.066956	0.19132	-0.022255	-0.13254	0.16502	0.56272
53.31890332	-0.031607	0.11717	0.59062	0.040875	0.05149	0.058581	0.016648	0.25561	0.18522	0.0074264	0.041767	0.040369	0.063825	-0.035471	0.33862	0.11172	0.10042	-0.041513	-0.0035885	0.038061	0.098817	0.2459	0.16985	0.21629	0.25118	0.23891	0.11639	-0.033934	0.57076	0.17063	0.053189	-0.0055819	0.060446	0.64983	-0.076668	0.034505	0.23869	1.0653	0.22274	0.2623	0.55317	0.33812	0.11353	0.058089	0.17283	-0.016064	-0.13769	0.16576	0.55515
53.39105339	-0.03558	0.11618	0.5589	0.00040522	0.072257	0.044047	0.0039367	0.23846	0.15531	0.03578	0.067764	0.014576	0.069843	-0.015815	0.30724	0.086464	0.088132	-0.023614	-0.014362	0.046807	0.039994	0.21897	0.11226	0.20029	0.23967	0.23907	0.14524	-0.013377	0.71452	0.15338	0.055656	-0.0014917	0.038529	0.59212	-0.07114	0.083201	0.25798	1.0405	0.20485	0.23265	0.5304	0.37198	0.097639	0.036534	0.19032	-0.026025	-0.14426	0.1746	0.59337
53.46320346	-0.022967	0.084833	0.54019	-0.00475	0.08138	0.050009	0.0078115	0.24032	0.10626	0.029478	0.13159	-0.01881	0.064575	-0.0030502	0.3008	0.10615	0.085177	0.012548	-0.037489	0.04618	-0.014864	0.15784	0.069213	0.13983	0.25785	0.22368	0.15492	-0.023362	0.83778	0.11949	0.04258	0.012686	0.019969	0.55121	-0.081587	0.092125	0.25844	0.97166	0.16842	0.20933	0.4894	0.37426	0.093822	0.018195	0.26858	-0.033862	-0.1531	0.16586	0.56696
53.53535354	-0.031215	0.064029	0.51659	0.055071	0.076914	0.048018	0.018885	0.23218	0.091249	0.0087246	0.22759	-0.029027	0.055423	0.010978	0.32414	0.11642	0.067041	0.028249	-0.020064	0.065214	-0.029141	0.091199	0.064563	0.068009	0.26017	0.22792	0.14418	-0.029543	1.0652	0.11921	0.029423	0.015495	0.045185	0.52739	-0.087173	0.069101	0.26499	0.93334	0.13956	0.19167	0.47992	0.33089	0.064862	0.0040248	0.34747	-0.028957	-0.15486	0.14757	0.51676
53.60750361	-0.04063	0.081485	0.52295	0.13307	0.049065	0.047508	0.026359	0.20807	0.11646	0.033177	0.30688	-0.038508	0.033078	0.019634	0.34285	0.1008	0.050543	0.014015	-0.0020204	0.067906	-0.02299	0.041619	0.074104	0.054722	0.24218	0.23994	0.13922	-0.04169	1.1575	0.13721	0.011124	0.023681	0.057608	0.53407	-0.086103	0.045196	0.28932	0.99606	0.17023	0.19153	0.49892	0.2852	0.039288	-0.020472	0.41958	-0.043345	-0.14335	0.10948	0.49587
53.67965368	-0.047465	0.11679	0.50867	0.15898	0.0074453	0.050126	0.050859	0.19979	0.13339	0.066263	0.33118	-0.051807	0.002742	0.0024461	0.34779	0.10783	0.023807	-0.0047167	-0.035199	0.048807	-0.021638	0.0053441	0.074036	0.088998	0.21528	0.25701	0.13428	-0.061424	1.2638	0.064979	0.009184	0.014231	0.021928	0.52374	-0.054298	0.024404	0.30701	1.0568	0.23179	0.21102	0.49936	0.2933	0.039526	-0.02628	0.48665	-0.038552	-0.13503	0.080773	0.48811
53.75180375	-0.044929	0.13151	0.46042	0.15535	-0.010475	0.044418	0.064814	0.17339	0.15366	0.062811	0.38583	-0.04523	-0.0098811	-0.02155	0.42207	0.1224	-0.0090903	-0.019282	-0.061701	0.065939	-0.015949	-0.027547	0.056809	0.074636	0.15911	0.289	0.14181	-0.077504	1.1966	0.071038	0.020933	-0.017518	-0.0078233	0.48701	0.00078938	0.053316	0.29407	1.0259	0.29604	0.19879	0.44475	0.33481	0.075777	-0.022682	0.56957	-0.0023259	-0.1185	0.068981	0.45721
53.82395382	-0.049495	0.10848	0.4354	0.15959	-0.029483	0.017219	0.070874	0.16056	0.15092	0.034116	0.46882	-0.046895	-0.023012	-0.011018	0.60495	0.11261	-0.015463	-0.018832	-0.039192	0.057363	-0.0030483	-0.03869	0.035132	0.047011	0.10888	0.33607	0.16045	-0.072535	1.1009	0.13339	0.0096641	-0.039626	-0.013532	0.44042	0.048242	0.11123	0.27375	0.97614	0.3525	0.15714	0.38981	0.33494	0.084411	-0.033913	0.64455	0.020358	-0.12157	0.071223	0.44209
53.8961039	-0.074609	0.062344	0.43485	0.15503	-0.029586	-0.0086949	0.069296	0.14782	0.12313	0.035988	0.47387	-0.024512	-0.025603	0.03571	0.77593	0.099798	-0.019087	0.0081521	-0.015976	0.0086061	-0.016288	-0.032813	0.016522	0.043024	0.090181	0.35122	0.17393	-0.05983	1.1528	0.11372	0.0099965	-0.02618	0.010373	0.37764	0.094407	0.15222	0.2712	0.95658	0.3772	0.18282	0.35356	0.30754	0.060193	-0.032892	0.66032	0.039248	-0.15896	0.066557	0.47574
53.96825397	-0.081308	0.033231	0.44489	0.14936	-0.016171	-0.016302	0.067041	0.13434	0.091394	0.024406	0.49468	0.0021847	-0.019711	0.09737	0.85442	0.080121	-0.032675	0.011787	-0.029718	-0.045268	-0.048163	-0.022838	0.0098727	0.056205	0.090248	0.35558	0.16797	-0.046663	1.2125	-0.0054185	0.028654	-0.012334	0.040927	0.33733	0.16006	0.15608	0.26166	0.922	0.39898	0.2969	0.35121	0.29152	0.059622	0.013106	0.6368	0.072423	-0.16406	0.06899	0.51702
54.04040404	-0.085998	0.023207	0.41252	0.17142	-0.014675	0.0054501	0.061964	0.15255	0.073037	-0.01082	0.54492	0.010766	-0.010526	0.1434	0.89598	0.049538	0.024871	-0.01738	-0.042688	-0.077081	-0.073206	-0.02565	0.01536	0.059051	0.090129	0.35725	0.13401	-0.027488	1.2476	-0.07846	0.037182	-0.0018456	0.054228	0.34949	0.22944	0.12744	0.21233	0.82444	0.39538	0.42859	0.35773	0.25127	0.060599	0.04725	0.62888	0.085305	-0.14503	0.11058	0.45635
54.11255411	-0.092735	0.0073126	0.35973	0.19396	-0.01153	0.017845	0.053115	0.14883	0.075644	-0.050352	0.57009	-0.0033294	-0.0073952	0.13896	0.92852	0.018516	0.085997	-0.0032092	0.010426	-0.053329	-0.073678	-0.040376	0.011377	0.083733	0.082339	0.33895	0.10019	-0.023009	1.1712	-0.072571	0.0072114	-0.0095807	0.076531	0.35856	0.29198	0.10163	0.17475	0.77109	0.38161	0.50026	0.3593	0.24659	0.018316	0.039215	0.67092	0.061748	-0.16255	0.1559	0.38385
54.18470418	-0.096558	0.011523	0.33703	0.20404	0.0024976	0.027865	0.055643	0.13992	0.073949	-0.041999	0.54982	-0.038754	0.001225	0.12261	0.90998	-0.0035309	0.096367	0.025199	0.065092	-0.018675	-0.060233	-0.035758	-0.0011773	0.11923	0.068188	0.31388	0.080655	-0.026294	1.2309	-0.029071	-0.01223	-0.0064581	0.097972	0.3316	0.33015	0.094757	0.1702	0.7341	0.34717	0.50038	0.37165	0.25034	-0.039255	0.0065072	0.67685	0.046348	-0.20672	0.12387	0.46293
54.25685426	-0.091234	0.043033	0.3413	0.17452	0.022357	0.039674	0.055216	0.14783	0.074158	-0.011322	0.53433	-0.02974	0.025106	0.12603	0.86332	0.023126	0.093989	0.010236	0.076041	-0.028627	-0.012318	-0.015684	-0.0059779	0.13175	0.051192	0.30397	0.058519	-0.010314	1.2746	-0.010162	-0.026488	0.014646	0.12441	0.30709	0.32279	0.093901	0.1662	0.67002	0.32759	0.50875	0.38101	0.22873	-0.039239	-0.01406	0.64935	0.059592	-0.20493	0.082019	0.56364
54.32900433	-0.078004	0.048083	0.34269	0.13709	0.0083098	0.021724	0.047736	0.14446	0.067535	0.0031851	0.53008	0.0044605	0.03275	0.11187	0.86513	0.054489	0.11502	-0.0079361	0.058995	-0.036548	0.049189	0.0056667	-0.006015	0.14202	0.034234	0.31967	0.046695	0.0054983	1.2931	-0.042304	-0.043555	0.032214	0.16568	0.27168	0.30097	0.096476	0.14174	0.63599	0.32972	0.50385	0.44622	0.1988	-0.00416	-0.026181	0.65356	0.070715	-0.19783	0.096046	0.53217
54.4011544	-0.079989	0.041759	0.34394	0.11489	-0.0077675	-0.00097298	0.048141	0.13228	0.069253	0.020015	0.51629	-0.0099958	0.02794	0.10763	0.89985	0.069164	0.14092	-0.0055476	0.030781	-0.039781	0.074088	0.024612	0.0072103	0.16838	0.02757	0.31526	0.068082	0.012959	1.291	-0.055455	-0.075604	0.029834	0.20638	0.23894	0.29964	0.081029	0.12682	0.65302	0.34426	0.45107	0.47445	0.19495	0.014997	-0.016843	0.68172	0.031184	-0.21235	0.096344	0.45461
54.47330447	-0.078688	0.043453	0.37138	0.11598	-0.010289	0.0095469	0.040999	0.12096	0.09298	0.060898	0.47672	-0.037017	0.0045137	0.12184	0.9069	0.087799	0.13969	-0.014732	0.0090483	-0.047654	0.084338	0.050973	0.019624	0.22235	0.0085397	0.25874	0.065203	0.038869	1.2715	-0.045305	-0.10387	0.041528	0.28097	0.22382	0.29605	0.044077	0.13131	0.67176	0.37638	0.41476	0.45529	0.20123	0.0020184	0.011765	0.67864	0.0087255	-0.17749	0.10557	0.46168
54.54545455	-0.090401	0.031851	0.36834	0.13147	-0.014014	0.011621	0.02545	0.10325	0.11928	0.080308	0.46435	-0.036972	-0.013314	0.11752	0.85953	0.099988	0.13273	-0.019586	-0.011959	-0.038049	0.083843	0.070379	0.011008	0.26224	-0.0090854	0.2107	0.042187	0.056269	1.265	-0.045206	-0.1377	0.058935	0.39663	0.20665	0.25771	0.021018	0.12342	0.60101	0.3903	0.41352	0.42918	0.17936	0.023457	0.0082375	0.66403	0.048409	-0.11816	0.11246	0.49052
54.61760462	-0.099004	0.04948	0.38169	0.13411	-0.038049	-0.0010696	0.033156	0.081332	0.14145	0.081557	0.48563	-0.0097103	-0.0071793	0.085325	0.78326	0.082515	0.13471	-0.042584	-0.047972	0.010703	0.10657	0.077643	0.0041321	0.27283	0.021704	0.19089	0.034145	0.064218	1.2724	-0.081627	-0.15356	0.064797	0.46988	0.2135	0.20572	0.011429	0.11669	0.52655	0.39736	0.40504	0.41591	0.17376	0.056304	-0.0044663	0.65689	0.12679	-0.094424	0.13705	0.47158
54.68975469	-0.066131	0.07952	0.42475	0.13313	-0.048031	0.009363	0.065739	0.067906	0.13121	0.072122	0.50224	0.016143	-0.0021522	0.05081	0.74885	0.060534	0.13249	-0.083178	-0.074127	0.062349	0.12006	0.11898	0.019953	0.29662	0.053995	0.19818	0.031039	0.094439	1.2513	-0.10959	-0.14602	0.070876	0.51309	0.23538	0.18585	-0.014411	0.13422	0.53572	0.42748	0.35401	0.4214	0.20074	0.055381	-0.00039065	0.61868	0.20338	-0.066163	0.20091	0.43868
54.76190476	-0.027742	0.073379	0.44125	0.15206	-0.029608	0.024399	0.058612	0.071894	0.11247	0.048333	0.49655	0.044751	0.0090281	0.040269	0.73976	0.086168	0.14624	-0.078089	-0.072952	0.10599	0.12782	0.17639	0.032687	0.35386	0.047222	0.1876	0.025624	0.13535	1.2549	-0.12913	-0.12699	0.076151	0.56343	0.2677	0.22711	-0.023812	0.14934	0.61145	0.46172	0.31472	0.41136	0.20754	0.012194	-0.0038528	0.57676	0.21812	-0.015844	0.26203	0.43035
54.83405483	-0.029413	0.080619	0.43329	0.14696	-0.0025496	0.015534	0.023832	0.070055	0.11922	0.017196	0.45895	0.070705	0.012144	0.037607	0.69706	0.10356	0.18716	-0.055947	-0.070017	0.15752	0.15391	0.22288	0.05174	0.42283	0.040476	0.16583	0.017638	0.15069	1.2744	-0.1553	-0.085853	0.082221	0.57108	0.36042	0.30119	-0.012012	0.14209	0.6676	0.51721	0.34689	0.37801	0.18397	-0.021488	-0.012383	0.50726	0.23124	0.014728	0.2502	0.47405
54.90620491	-0.033272	0.14243	0.4307	0.13611	0.033008	0.0089756	-0.010603	0.052719	0.12817	0.020234	0.42898	0.054501	0.017278	0.044852	0.66556	0.10002	0.21265	-0.047763	-0.043859	0.16156	0.17455	0.28738	0.065091	0.44373	0.047198	0.17012	0.024019	0.15691	1.2789	-0.15615	-0.027737	0.09016	0.5155	0.45315	0.33929	-0.018649	0.14216	0.68884	0.54085	0.44077	0.30475	0.21377	0.0067275	-0.022863	0.46152	0.25842	0.0099734	0.22296	0.49801
54.97835498	-0.015284	0.15227	0.43427	0.15732	0.052971	0.012074	-0.021287	0.025131	0.10314	0.037209	0.41872	0.017095	0.047159	0.042368	0.66413	0.085672	0.18609	-0.047727	-0.015869	0.14178	0.16146	0.36324	0.091728	0.41727	0.0376	0.16004	0.025897	0.23388	1.2297	-0.092111	0.027319	0.1011	0.47246	0.46829	0.32809	-0.035157	0.14334	0.76423	0.51736	0.49964	0.2674	0.26755	0.063514	-0.041555	0.45658	0.3194	-0.022098	0.17395	0.47421
55.05050505	-0.020731	0.095383	0.42522	0.17693	0.039006	0.03061	-0.0025546	0.022892	0.080873	0.0443	0.41618	0.0011324	0.06318	0.016255	0.63421	0.074164	0.17515	-0.056802	-0.028601	0.15471	0.14538	0.41351	0.12069	0.38263	0.02416	0.13705	0.010548	0.33103	1.2044	-0.016203	0.048411	0.096685	0.49428	0.45369	0.29886	-0.031844	0.12868	0.85293	0.48145	0.50528	0.28622	0.24395	0.073163	-0.050936	0.44971	0.39279	-0.054881	0.14427	0.44658
55.12265512	-0.049405	0.041926	0.41558	0.17548	0.034294	0.056186	-0.0079488	0.048339	0.081296	0.048961	0.3691	-0.010143	0.061306	0.0031108	0.55108	0.059625	0.18271	-0.062197	-0.056191	0.18548	0.15557	0.40839	0.11604	0.35921	0.014581	0.12651	0.0038417	0.39026	1.2357	-0.0027559	0.043992	0.075196	0.55556	0.45579	0.29057	-0.0089803	0.097743	0.86263	0.46703	0.50807	0.27992	0.19284	0.028008	-0.023851	0.48152	0.4502	-0.054392	0.1576	0.44954
55.19480519	-0.065634	0.018526	0.42451	0.13476	0.063894	0.045871	-0.039867	0.049491	0.10166	0.053336	0.31121	-0.029385	0.050486	-0.0082448	0.49359	0.045693	0.16829	-0.067973	-0.084442	0.21436	0.17137	0.35562	0.098693	0.35418	0.0012996	0.11317	0.0014186	0.42796	1.2734	-0.0023342	0.027095	0.050293	0.57755	0.44641	0.2737	-0.010733	0.087888	0.81582	0.48687	0.51971	0.24552	0.1498	0.014534	-0.014281	0.59342	0.463	-0.012614	0.14412	0.44741
55.26695527	-0.045079	0.015089	0.44657	0.093585	0.049586	0.028788	-0.03674	0.028565	0.10094	0.055841	0.27341	-0.042276	0.024754	-0.041034	0.47826	0.028761	0.14113	-0.063523	-0.070791	0.26461	0.17146	0.34923	0.09094	0.31544	-0.016466	0.14198	0.014548	0.42176	1.362	-0.0068928	0.020233	0.026664	0.54579	0.40425	0.25129	-0.027871	0.10024	0.76223	0.48851	0.50302	0.22791	0.12193	0.057199	-0.05195	0.68919	0.44668	0.02595	0.15872	0.42224
55.33910534	-0.014001	0.0075947	0.42137	0.065784	0.0062185	0.062944	-0.010461	0.010502	0.065336	0.070948	0.25777	-0.037017	0.018932	-0.035648	0.45384	0.0079263	0.11435	-0.053099	-0.030583	0.30536	0.15927	0.37034	0.096131	0.29466	-0.034754	0.21769	0.045612	0.3896	1.4123	-0.0070412	0.041431	0.0045922	0.49342	0.36387	0.25127	-0.037425	0.11983	0.73062	0.45671	0.48568	0.26095	0.12622	0.087357	-0.08368	0.67599	0.39325	0.0030096	0.1728	0.34798
55.41125541	-0.013815	0.0093592	0.40052	0.042354	0.033497	0.092405	-0.010515	-0.00019419	0.053398	0.06656	0.24931	-0.0095608	0.048252	-0.015175	0.42995	0.0030289	0.11914	-0.032711	0.0038912	0.27219	0.14982	0.35001	0.088981	0.26764	-0.023131	0.26915	0.07407	0.3522	1.5094	0.011569	0.048389	-0.018873	0.46246	0.34074	0.24892	-0.018044	0.15863	0.72492	0.4213	0.49162	0.27153	0.15386	0.092329	-0.085905	0.65903	0.32566	-0.0018106	0.16524	0.27398
55.48340548	-0.025927	0.0057972	0.41822	0.068759	0.068375	0.083583	-0.015136	0.001986	0.061156	0.044548	0.23993	-0.014961	0.069244	-0.0069241	0.39708	0.0013844	0.14572	-0.012037	0.026185	0.23913	0.14	0.32309	0.064665	0.25217	0.0039329	0.30464	0.087363	0.29829	1.6061	0.01861	0.044404	-0.022763	0.52936	0.30904	0.22256	0.017771	0.28724	0.70075	0.3784	0.46282	0.24457	0.14508	0.085975	-0.090449	0.67291	0.29035	0.0011825	0.17646	0.24365
55.55555556	-0.047806	-0.018803	0.41893	0.10361	0.050971	0.062466	-0.0034536	-0.0015237	0.064313	0.022808	0.23109	-0.049773	0.054865	-0.0066547	0.40832	-0.01695	0.16056	0.024782	0.028124	0.29543	0.13056	0.29917	0.055306	0.24649	0.030854	0.31	0.10266	0.26161	1.6328	0.016132	0.031665	-0.0043077	0.65431	0.28597	0.18041	0.038141	0.50668	0.68874	0.37455	0.4089	0.24073	0.10878	0.066303	-0.098949	0.67192	0.31376	-0.013968	0.1945	0.27545
55.62770563	-0.074361	-0.055914	0.33787	0.090586	0.038952	0.031738	0.0046718	0.0055875	0.064902	0.029016	0.21365	-0.060065	0.040873	-0.0056216	0.46188	-0.013218	0.1315	0.038546	0.017692	0.40007	0.13953	0.29695	0.073712	0.2485	0.042779	0.29397	0.10891	0.28114	1.5907	0.011685	0.037863	0.016888	0.69403	0.27974	0.14944	0.040913	0.68817	0.71798	0.36609	0.36108	0.25163	0.10799	0.057134	-0.093254	0.64259	0.34688	-0.012077	0.19311	0.28519
55.6998557	-0.066595	-0.072724	0.29704	0.08406	0.018195	0.0099353	0.013027	0.024435	0.070684	0.041593	0.19453	-0.045904	0.042567	-0.0026618	0.48527	0.019552	0.10221	0.00065111	-0.010186	0.46807	0.15301	0.31475	0.086589	0.27087	0.06133	0.25669	0.11107	0.48444	1.5637	0.016342	0.043677	0.032866	0.6709	0.26493	0.13196	0.041228	0.76379	0.81646	0.3288	0.34182	0.26611	0.10893	0.076316	-0.025344	0.61948	0.33962	-0.00070768	0.17993	0.22119
55.77200577	-0.029967	-0.058999	0.314	0.11889	-0.003035	0.0030791	0.027887	0.023945	0.076365	0.023792	0.19087	-0.031297	0.055378	-0.00062985	0.45439	0.031491	0.10469	-0.025074	-0.023845	0.45151	0.14223	0.3099	0.088461	0.28242	0.10266	0.20986	0.099837	0.81209	1.5875	0.018276	0.042985	0.029713	0.65123	0.2286	0.11017	0.041841	0.76082	0.92767	0.30882	0.32247	0.25446	0.11393	0.12081	0.045332	0.63067	0.31828	-0.0075673	0.15287	0.1863
55.84415584	-0.0047569	-0.027272	0.32277	0.14725	-0.018888	-0.0033542	0.043022	0.0040644	0.064379	0.0017018	0.18187	-0.019962	0.057954	-0.0097002	0.41756	0.032111	0.092174	-0.012657	0.00956	0.38593	0.14386	0.29192	0.093594	0.27978	0.1465	0.17009	0.086928	1.0479	1.5793	0.010594	0.067851	0.0030299	0.61374	0.19947	0.094225	0.041701	0.75263	1.0191	0.29793	0.29629	0.27848	0.12979	0.16142	0.046233	0.63594	0.32407	-0.01463	0.12947	0.21959
55.91630592	-0.026183	-0.016278	0.30294	0.14545	-0.016272	0.0039465	0.054873	-0.008936	0.039229	0.0099228	0.17952	-0.017219	0.060885	-0.031648	0.40094	0.043266	0.042842	0.03006	0.034663	0.3456	0.13743	0.26272	0.085255	0.29844	0.1573	0.15556	0.073999	1.2125	1.5878	0.0052748	0.11651	-0.0098841	0.54859	0.19136	0.073986	0.034515	0.74187	1.0382	0.32359	0.26591	0.34263	0.1177	0.14147	0.039228	0.6048	0.32687	0.026637	0.15242	0.21974
55.98845599	-0.044613	-0.047661	0.27553	0.15173	0.0061255	0.062122	0.049641	-0.0021278	0.038901	0.023454	0.1969	-0.025615	0.054429	-0.038276	0.38262	0.045442	0.014627	0.10024	0.032808	0.32803	0.13344	0.23814	0.10345	0.31203	0.14649	0.19461	0.075959	1.3003	1.616	0.013386	0.1465	-0.01852	0.45464	0.18399	0.059447	0.016563	0.67514	0.98303	0.34313	0.23858	0.3324	0.097218	0.098567	0.038989	0.58744	0.31442	0.075319	0.16957	0.20332
56.06060606	-0.055428	-0.083744	0.28765	0.14947	0.031735	0.12976	0.037404	0.026062	0.048061	0.027836	0.20371	-0.032056	0.049979	-0.02692	0.39301	0.049233	0.021542	0.15619	0.041515	0.31065	0.18992	0.26408	0.13383	0.3239	0.15823	0.2336	0.10571	1.3481	1.5456	0.029774	0.1733	-0.020882	0.38633	0.17723	0.072915	0.0077648	0.60898	0.96134	0.35807	0.24458	0.24153	0.042498	0.066594	0.021939	0.62086	0.30375	0.080551	0.20699	0.24468
56.13275613	-0.066288	-0.10443	0.30236	0.12464	0.053363	0.16215	0.054283	0.041376	0.043512	0.035782	0.18954	-0.030327	0.051031	-0.01954	0.38246	0.068229	0.055439	0.15079	0.048942	0.32844	0.30425	0.29683	0.13385	0.33099	0.18548	0.25763	0.13326	1.3682	1.429	0.025864	0.18556	-0.0090716	0.36245	0.15358	0.082148	0.0035807	0.59951	0.99466	0.38534	0.25685	0.22137	-0.0305	0.025778	-0.0094881	0.65849	0.28575	0.066223	0.21314	0.32296
56.2049062	-0.035237	-0.12977	0.29029	0.11372	0.042036	0.1253	0.092431	0.040074	0.052042	0.038462	0.16326	-0.023542	0.036909	-0.025752	0.35465	0.09758	0.079259	0.12781	0.076783	0.33461	0.39529	0.29975	0.12111	0.31326	0.20761	0.27147	0.16532	1.3624	1.3682	0.0095344	0.186	0.011083	0.33916	0.13374	0.079395	-0.0045843	0.60791	1.0701	0.39346	0.25296	0.24202	-0.058849	0.024784	-0.018276	0.67928	0.28552	0.08819	0.17105	0.347
56.27705628	-0.0011954	-0.12854	0.27728	0.094927	0.029152	0.089108	0.099476	0.065242	0.087547	0.037932	0.16472	-0.019208	0.059679	-0.021187	0.35308	0.10994	0.071688	0.15458	0.13648	0.32065	0.42923	0.28548	0.12465	0.27777	0.21821	0.25752	0.18677	1.2924	1.2927	0.016924	0.18293	0.042817	0.30278	0.13536	0.10499	-0.020921	0.59435	1.1406	0.37192	0.24058	0.24461	-0.048244	0.088363	-0.034933	0.68667	0.27701	0.13395	0.15037	0.32413
56.34920635	-0.00022165	-0.10892	0.27416	0.088239	0.021732	0.048246	0.083402	0.084282	0.10113	0.068797	0.1818	-0.014823	0.087913	-0.0085121	0.34928	0.10976	0.051488	0.17942	0.14686	0.34515	0.40075	0.26542	0.15238	0.23731	0.21826	0.27123	0.19683	1.2141	1.2047	0.028518	0.16478	0.051896	0.2775	0.13793	0.14925	-0.031594	0.56851	1.1194	0.37788	0.24565	0.21222	-0.0044957	0.13391	-0.038493	0.70406	0.25414	0.14067	0.11855	0.32245
56.42135642	-0.017915	-0.08079	0.25555	0.1101	0.020413	0.025191	0.076467	0.064995	0.088203	0.099153	0.18394	0.00045907	0.10437	-0.0094739	0.32833	0.11089	0.042418	0.17781	0.11729	0.3587	0.33927	0.25779	0.16415	0.26382	0.21487	0.29298	0.22149	1.1983	1.1326	0.023373	0.14635	0.035881	0.25032	0.10486	0.16741	-0.051912	0.53663	1.0212	0.37722	0.31511	0.20907	0.00025145	0.11683	-0.038875	0.70085	0.2636	0.12155	0.071391	0.34771
56.49350649	-0.044873	-0.053041	0.23093	0.12846	0.0068111	0.015518	0.078349	0.053964	0.075184	0.094104	0.20113	0.0012994	0.11824	-0.0076288	0.3222	0.13517	0.054455	0.15454	0.10218	0.28673	0.36357	0.23916	0.15143	0.4311	0.21108	0.28042	0.24444	1.2449	1.1524	-0.01455	0.14562	0.031493	0.20697	0.068199	0.18002	-0.041611	0.53449	0.9428	0.37213	0.46751	0.27986	-0.043442	0.1012	-0.054898	0.66746	0.2725	0.12549	0.046173	0.31888
56.56565657	-0.051128	-0.04944	0.22014	0.12233	0.0020781	0.012704	0.058842	0.044656	0.061772	0.060941	0.22831	-0.025642	0.13734	0.0072681	0.32816	0.13259	0.047645	0.12487	0.087331	0.20463	0.51973	0.20622	0.131	0.6884	0.20469	0.27793	0.2516	1.2662	1.179	-0.017936	0.16893	0.045135	0.15606	0.0588	0.23087	-0.0051959	0.58903	0.91504	0.37795	0.64496	0.31855	-0.072078	0.092113	-0.046658	0.6437	0.29371	0.12046	0.044126	0.25613
56.63780664	-0.024537	-0.048275	0.22919	0.12079	0.019979	0.029504	0.042063	0.01113	0.032352	0.047268	0.26447	-0.043332	0.13934	0.021052	0.32708	0.11215	0.028738	0.10076	0.074827	0.21326	0.73526	0.22074	0.10374	0.91726	0.19505	0.3073	0.27088	1.2481	1.1513	0.0050118	0.17433	0.058523	0.12843	0.041509	0.26656	0.0062903	0.69134	0.88502	0.37355	0.76095	0.26994	-0.064639	0.1262	-0.039278	0.66846	0.32881	0.12754	0.052122	0.23623
56.70995671	-0.016534	-0.053229	0.22995	0.12542	0.050217	0.040356	0.036225	-0.0052541	-0.0093773	0.041192	0.29908	-0.04247	0.1319	0.001551	0.3101	0.11529	0.0091506	0.089422	0.11262	0.34907	0.86091	0.27141	0.099153	1.0309	0.17076	0.31591	0.26678	1.2746	1.1207	0.012713	0.17528	0.071952	0.11851	0.031122	0.26572	-0.007225	0.76862	0.82595	0.35264	0.79753	0.19806	-0.038647	0.12748	-0.036204	0.62097	0.36053	0.13966	0.052178	0.22508
56.78210678	-0.0045474	-0.043601	0.19114	0.14101	0.066853	0.039315	0.021226	0.00082931	-0.040217	0.010096	0.30765	-0.033963	0.14001	-0.010155	0.26986	0.12423	-0.0048616	0.07848	0.13038	0.70312	0.88741	0.33063	0.11967	1.0393	0.15481	0.27129	0.22662	1.3109	1.0977	0.046275	0.1608	0.078748	0.092358	0.063059	0.27317	-0.016912	0.77779	0.7722	0.3614	0.7634	0.17714	-0.030179	0.10794	-0.028203	0.54757	0.33282	0.10128	0.053568	0.16584
56.85425685	0.0023987	-0.023193	0.1834	0.15802	0.038666	0.04968	-0.006204	0.00041846	-0.053366	-0.036827	0.31305	-0.014686	0.14642	0.0077458	0.21893	0.14854	-0.010794	0.04983	0.067909	1.1831	0.86562	0.33982	0.12426	1.0119	0.15662	0.2304	0.22044	1.2908	1.0685	0.036518	0.12613	0.060827	0.073122	0.088615	0.29474	-0.012067	0.7484	0.72727	0.40419	0.74337	0.20113	-0.050859	0.11729	-0.0087643	0.53608	0.30049	0.04985	0.056114	0.17635
56.92640693	-0.0091609	-0.028985	0.21782	0.17135	-0.014081	0.064925	0.00024345	0.005467	-0.065267	-0.069539	0.33128	0.018385	0.13507	0.031147	0.16701	0.16347	-0.020031	0.027557	0.026773	1.5431	0.8258	0.26549	0.11137	1.028	0.16822	0.25679	0.24284	1.2679	1.0418	0.027997	0.11009	0.03529	0.097665	0.10937	0.36803	-0.0041109	0.69273	0.6696	0.41786	0.76031	0.19595	-0.020961	0.11661	0.033598	0.52198	0.31651	0.036011	0.058176	0.24191
56.998557	-0.013336	-0.046665	0.22811	0.15586	-0.031689	0.076497	0.019184	0.024298	-0.0529	-0.071896	0.35515	0.040106	0.13261	0.025627	0.16268	0.15342	0.006363	0.016069	0.031673	1.6761	0.82971	0.17885	0.07981	1.0224	0.16169	0.3231	0.25588	1.2819	0.98299	0.037386	0.10543	0.033453	0.11096	0.13938	0.48738	-0.015301	0.65322	0.62428	0.41911	0.74136	0.19448	0.0073711	0.10096	0.039561	0.4972	0.33854	0.018433	0.077293	0.27203
57.07070707	-0.024782	-0.01336	0.222	0.11905	-0.01887	0.074759	0.018653	0.037889	-0.033501	-0.062356	0.34267	0.021544	0.12779	-0.0097004	0.20268	0.15262	0.04046	0.019078	0.030765	1.6555	0.83191	0.14535	0.045142	0.95332	0.15639	0.3534	0.25145	1.2953	0.98963	0.071644	0.10858	0.039825	0.087736	0.14682	0.65788	-0.034479	0.63747	0.64973	0.40421	0.68946	0.24508	0.014194	0.090202	0.015143	0.52547	0.3703	-0.042864	0.085467	0.26044
57.14285714	-0.026396	0.021999	0.21498	0.095209	-0.010346	0.087546	0.042923	0.050471	-0.037689	-0.034963	0.32309	-0.01273	0.085065	-0.035284	0.22097	0.16872	0.020051	-0.003931	0.037245	1.5876	0.79554	0.14075	0.031547	0.82861	0.15178	0.34435	0.24928	1.1724	1.0531	0.072514	0.11926	0.01995	0.024362	0.1276	0.93955	-0.021453	0.62816	0.69339	0.36909	0.69038	0.26776	-0.0019968	0.096311	0.029172	0.57002	0.41986	-0.041325	0.085548	0.25074
57.21500722	-0.0063129	0.022912	0.20622	0.097526	-0.0091251	0.079824	0.068733	0.051369	-0.028904	-0.030995	0.32325	-0.034318	0.062263	-0.025591	0.22223	0.24036	0.0037119	-0.018119	0.03613	1.5339	0.72365	0.15442	0.028922	0.73778	0.12161	0.32789	0.22944	1.0178	1.1125	0.060821	0.12526	0.010136	-0.037116	0.096596	1.2895	0.054803	0.61895	0.62249	0.35048	0.76614	0.23999	-0.030576	0.11751	0.080198	0.56737	0.45658	-0.0010522	0.10358	0.26311
57.28715729	0.014893	0.026832	0.20498	0.079418	0.0092599	0.062843	0.059965	0.039669	-0.0089213	-0.052883	0.31455	-0.028319	0.080128	0.010445	0.19748	0.37093	-0.0024469	-0.0099834	0.0048699	1.4591	0.65267	0.17584	0.064597	0.69842	0.09443	0.30952	0.22537	0.99186	1.1612	0.041509	0.10253	0.018682	-0.036703	0.054617	1.7219	0.13135	0.58949	0.50582	0.33873	0.83383	0.24	-0.018302	0.095001	0.1016	0.50947	0.47096	0.0069983	0.1156	0.25196
57.35930736	0.038587	0.02033	0.184	0.080572	0.031305	0.045279	0.054949	0.023997	-0.010222	-0.048702	0.31034	-0.032379	0.092013	0.055962	0.16283	0.46632	-0.014081	0.042128	0.016536	1.3922	0.65212	0.17356	0.10833	0.64075	0.073242	0.31021	0.2318	1.0314	1.1951	0.031544	0.057985	0.023447	0.0047674	0.020921	2.1376	0.184	0.53797	0.49526	0.33735	0.88434	0.25738	0.021069	0.078057	0.097669	0.51232	0.51216	0.020004	0.097664	0.19621
57.43145743	0.045307	0.0085696	0.14384	0.1219	0.038121	0.017927	0.065871	0.019296	-0.0040741	-0.04212	0.30477	-0.042778	0.12437	0.077311	0.16472	0.51277	-0.0018758	0.086714	0.058066	1.333	0.64503	0.16809	0.13012	0.61388	0.044146	0.30145	0.22899	1.0356	1.1549	0.056964	0.032142	0.038471	0.019295	0.011638	2.3631	0.21445	0.48895	0.54685	0.33274	0.92396	0.2031	0.13132	0.083326	0.073049	0.5338	0.54297	0.03884	0.075588	0.18538
57.5036075	0.032924	-0.0012734	0.11746	0.13533	0.032933	0.020364	0.081657	0.023742	0.021149	-0.054449	0.26935	-0.046762	0.15203	0.067768	0.18359	0.53156	0.016962	0.082236	0.11003	1.2699	0.63201	0.1799	0.13855	0.613	0.017371	0.28812	0.22463	0.93653	1.0957	0.099203	0.0095918	0.051647	-0.0091741	0.023053	2.3725	0.20701	0.42798	0.51827	0.32305	0.95011	0.14937	0.25951	0.11405	0.052759	0.50577	0.54572	0.033057	0.057392	0.25617
57.57575758	0.024645	-0.0076986	0.10563	0.097726	0.046806	0.048307	0.11586	0.018541	0.036356	-0.054517	0.26707	-0.036647	0.14471	0.044773	0.18309	0.5562	0.024475	0.074248	0.13728	1.2108	0.61612	0.19689	0.18797	0.6143	0.0089173	0.26723	0.21269	0.84378	1.0877	0.098086	-0.021833	0.040126	-0.053866	0.027909	2.384	0.1876	0.37154	0.44661	0.32901	0.95295	0.13497	0.32154	0.162	0.042239	0.48097	0.53072	0.042268	0.034817	0.27134
57.64790765	0.029316	0.07701	0.10244	0.074055	0.073809	0.047811	0.1603	0.0082906	0.020426	-0.056864	0.29251	-0.01608	0.1362	0.04169	0.18793	0.58827	0.027314	0.070938	0.12086	1.1758	0.56292	0.23165	0.27295	0.60201	-0.0093936	0.23591	0.2003	0.82802	1.0805	0.11324	-0.024615	0.036321	-0.055965	0.045169	2.667	0.18869	0.3567	0.43633	0.33614	0.89641	0.14935	0.36131	0.14219	0.018506	0.42468	0.50109	0.061957	0.046882	0.21838
57.72005772	0.046029	0.31297	0.1099	0.082469	0.080287	0.033767	0.19194	0.029421	-0.017316	-0.058453	0.27861	-0.014081	0.13543	0.058216	0.2126	0.58162	0.00076562	0.061012	0.091126	1.1221	0.49967	0.27169	0.32253	0.5853	-0.033532	0.22938	0.18087	0.79611	1.0248	0.15169	-0.028408	0.040273	-0.033902	0.047652	3.1767	0.17155	0.35014	0.44136	0.29448	0.8893	0.14537	0.43929	0.063291	0.0069601	0.34383	0.50939	0.14447	0.086918	0.20077
57.79220779	0.057847	0.59294	0.12815	0.074794	0.047709	0.033682	0.20005	0.044045	-0.039766	-0.054901	0.23238	-0.022438	0.1293	0.091343	0.22713	0.55106	-0.042578	0.01984	0.059124	1.0653	0.45379	0.27337	0.32962	0.55264	-0.043873	0.25084	0.18178	0.72903	0.95898	0.20751	-0.029163	0.060517	-0.0089389	0.016582	3.587	0.13633	0.31142	0.39772	0.23236	0.95305	0.12593	0.49853	0.027904	0.023673	0.28709	0.48996	0.23375	0.11873	0.19761
57.86435786	0.052662	0.77173	0.13607	0.077361	0.029688	0.041559	0.22539	0.032738	-0.034159	-0.063749	0.20118	-0.028734	0.13629	0.13584	0.24278	0.54663	-0.026114	-0.024275	0.005072	0.98285	0.45124	0.24219	0.30604	0.53121	-0.053337	0.24771	0.18153	0.67885	0.92328	0.20502	-0.053313	0.11933	0.0074768	-0.015278	3.7717	0.11266	0.28825	0.35268	0.20392	0.96311	0.14351	0.54857	0.057323	-0.0041508	0.27914	0.48948	0.27251	0.12303	0.13156
57.93650794	0.049885	0.80445	0.12247	0.070577	0.039852	0.040265	0.22714	0.022714	-0.021249	-0.06056	0.19336	-0.016913	0.15178	0.16339	0.25098	0.54402	0.014967	-0.054181	-0.047618	0.87532	0.41197	0.19957	0.26576	0.53087	-0.064654	0.19759	0.14037	0.63743	0.88617	0.20284	-0.082217	0.18615	0.019514	0.0011862	3.961	0.1265	0.29355	0.33349	0.17431	0.88233	0.15194	0.52944	0.072075	-0.051741	0.27932	0.5683	0.25111	0.098579	0.081475
58.00865801	0.04467	0.74591	0.1195	0.069151	0.05863	0.034675	0.1989	0.025512	-0.022862	-0.054047	0.21038	0.0059856	0.1578	0.148	0.26751	0.53328	0.0093599	-0.07434	-0.085478	0.78668	0.36285	0.16862	0.2055	0.52453	-0.074328	0.16252	0.09136	0.5989	0.82745	0.22323	-0.10821	0.21734	0.0014573	0.030255	4.1733	0.21686	0.26858	0.31023	0.17424	0.79223	0.12401	0.4807	0.042937	-0.071556	0.25362	0.64249	0.24478	0.088816	0.1151
58.08080808	0.027414	0.7224	0.13084	0.092435	0.058181	0.038653	0.17256	0.04621	-0.018993	-0.03994	0.23307	0.023726	0.15616	0.12792	0.30578	0.51917	0.021654	-0.05352	-0.094544	0.72378	0.35094	0.13503	0.16051	0.52914	-0.090821	0.15598	0.054807	0.55496	0.83149	0.26154	-0.10909	0.21152	-0.040022	0.031771	4.2007	0.33835	0.2101	0.25923	0.19985	0.75774	0.10549	0.47085	0.05197	-0.020317	0.22453	0.62115	0.30026	0.082466	0.16805
58.15295815	0.007609	0.72164	0.11164	0.094793	0.051111	0.047795	0.16346	0.054322	0.022774	-0.029425	0.21919	0.032273	0.15504	0.13547	0.30916	0.47177	0.057581	-0.01838	-0.067328	0.69904	0.3392	0.10038	0.15869	0.55299	-0.10255	0.14975	0.03477	0.54117	0.8429	0.26236	-0.11035	0.20091	-0.038369	0.040008	4.0215	0.4047	0.17075	0.22719	0.2225	0.70304	0.13026	0.47354	0.079737	0.07504	0.20083	0.5955	0.33941	0.064954	0.1766
58.22510823	0.00075895	0.66684	0.12417	0.085227	0.033333	0.040977	0.15862	0.0311	0.067209	-0.024049	0.16018	0.0073263	0.14855	0.14516	0.26966	0.43093	0.057981	-0.010397	-0.024772	0.66185	0.3021	0.059372	0.14803	0.57694	-0.092548	0.14644	0.036235	0.59357	0.83455	0.25615	-0.11446	0.2221	-0.0028889	0.068906	3.8833	0.41211	0.18131	0.26132	0.24237	0.65287	0.1282	0.45169	0.061144	0.12442	0.16529	0.61196	0.33948	0.042738	0.1572
58.2972583	0.025468	0.60528	0.13804	0.060876	0.029872	0.036107	0.12162	0.020081	0.06556	-0.0040208	0.12695	-0.02767	0.12509	0.15043	0.21942	0.43162	0.010772	-0.032169	-0.016283	0.64063	0.26059	0.019519	0.10746	0.56742	-0.080898	0.14252	0.049634	0.63595	0.79252	0.30832	-0.11905	0.25593	0.021765	0.087597	3.8797	0.41162	0.18805	0.29617	0.247	0.6449	0.1019	0.44112	0.049913	0.10472	0.13939	0.57944	0.35022	-0.0087388	0.14309
58.36940837	0.041024	0.6162	0.11067	0.051871	0.041419	0.02593	0.073156	0.033618	0.046493	0.0068346	0.13814	-0.038357	0.11044	0.15392	0.20221	0.43713	-0.024417	-0.061535	-0.019552	0.62478	0.23641	-0.0081803	0.059137	0.51712	-0.074635	0.13948	0.07126	0.62012	0.74503	0.35071	-0.13371	0.27055	0.032967	0.073597	3.7477	0.40803	0.16961	0.27401	0.2361	0.61968	0.10824	0.41147	0.072067	0.066893	0.12325	0.55766	0.37922	-0.076004	0.11389
58.44155844	0.051475	0.67959	0.1244	0.053367	0.055696	0.01169	0.049903	0.046345	0.063889	0.0057658	0.1369	-0.049777	0.11387	0.15654	0.20222	0.40711	-0.048447	-0.064978	0.018475	0.59314	0.23764	-0.018742	0.021956	0.50252	-0.078119	0.12242	0.10204	0.60326	0.66029	0.37464	-0.14013	0.25718	0.037107	0.066896	3.5401	0.38924	0.15798	0.2547	0.20705	0.58026	0.12874	0.36534	0.093043	0.04272	0.095432	0.57134	0.3991	-0.105	0.1063
58.51370851	0.031504	0.74042	0.17431	0.041415	0.055998	0.0073277	0.051033	0.030091	0.083493	0.026153	0.14058	-0.10351	0.085989	0.17348	0.18979	0.33415	-0.068838	-0.036259	0.058787	0.58191	0.2707	0.0016282	0.018939	0.52149	-0.07572	0.13077	0.1319	0.61478	0.57122	0.38626	-0.11127	0.23196	0.032643	0.074284	3.3639	0.36363	0.15753	0.2586	0.20231	0.54449	0.079726	0.36573	0.11553	0.042226	0.058868	0.57722	0.3973	-0.088848	0.14379
58.58585859	0.01601	0.75154	0.18349	0.024456	0.03831	0.0086025	0.072879	-0.0037756	0.091166	0.02113	0.2114	-0.12837	0.052509	0.17787	0.16431	0.25372	-0.073743	-0.00017241	0.061133	0.57157	0.30227	0.01578	0.016098	0.51218	-0.077747	0.15786	0.13597	0.61581	0.56538	0.36926	-0.099831	0.20774	0.0058105	0.082482	3.2971	0.32892	0.14527	0.23265	0.20259	0.52694	0.034045	0.36916	0.11144	0.049801	0.036082	0.561	0.36092	-0.04071	0.15086
58.65800866	0.020107	0.7671	0.17134	0.060555	0.018255	0.0064478	0.070254	-0.01603	0.090394	-0.016223	0.31987	-0.091437	0.044047	0.19026	0.13128	0.2467	-0.026734	0.018116	0.030999	0.54373	0.3254	0.020866	-0.010342	0.49808	-0.074984	0.17799	0.12004	0.69351	0.56646	0.33392	-0.12209	0.18664	-0.012777	0.10134	3.1473	0.31094	0.12913	0.17019	0.18728	0.50857	0.028213	0.37425	0.059129	0.046509	0.0051733	0.4971	0.36345	-0.027169	0.15294
58.73015873	0.013456	0.77339	0.14798	0.10838	0.010456	0.019155	0.067719	-0.0076785	0.07383	-0.019364	0.37561	-0.054598	0.066867	0.19595	0.10947	0.27004	0.052616	0.039529	0.00018178	0.51047	0.32457	0.02505	-0.019341	0.49781	-0.05157	0.19211	0.096102	0.78667	0.56796	0.29142	-0.11992	0.18483	-0.042229	0.11489	2.8867	0.3047	0.12744	0.14069	0.14822	0.46472	0.014142	0.38055	0.064838	-0.012023	-0.026425	0.43212	0.41847	-0.040815	0.19459
58.8023088	0.014235	0.81269	0.15151	0.12574	0.01201	0.030016	0.07512	-0.003622	0.063344	0.0093881	0.37198	-0.033434	0.10315	0.15668	0.11183	0.25174	0.073476	0.048004	-0.0027395	0.50867	0.29294	0.03122	-0.019945	0.52857	-0.041285	0.21572	0.09438	0.87588	0.55938	0.28836	-0.10665	0.19781	-0.058686	0.12217	2.7455	0.29512	0.15116	0.14399	0.13492	0.42933	-0.020154	0.36039	0.16402	-0.062829	-0.036959	0.41121	0.46353	-0.059325	0.23436
58.87445887	0.023994	0.97225	0.16997	0.10533	0.031841	0.034593	0.091731	0.027582	0.073634	0.013564	0.36118	-0.025496	0.12242	0.10499	0.12409	0.25419	0.058753	0.029731	0.0092161	0.52921	0.26514	0.028971	-0.017303	0.57291	-0.04187	0.24072	0.11786	0.93382	0.50347	0.31982	-0.10037	0.19355	-0.060663	0.13234	2.7608	0.27814	0.17155	0.1433	0.12087	0.44273	-0.032618	0.33406	0.25117	-0.067014	0.0031009	0.45566	0.49254	-0.08572	0.21565
58.94660895	0.036173	1.1107	0.15729	0.10119	0.050193	0.036036	0.10056	0.069393	0.075923	-0.0022297	0.33684	-0.03712	0.12563	0.060949	0.11257	0.25859	0.021716	0.0052632	0.013226	0.51459	0.28546	0.021652	0.001196	0.67963	-0.0054353	0.25892	0.13275	0.99931	0.48397	0.33592	-0.095842	0.18292	-0.066499	0.13457	2.6654	0.25601	0.16882	0.13635	0.10039	0.48729	0.011901	0.32225	0.2882	-0.058385	0.04929	0.49698	0.4938	-0.10535	0.22234
59.01875902	0.041386	1.185	0.13267	0.11601	0.046067	0.019833	0.098526	0.069694	0.066041	-0.0010069	0.33816	-0.047811	0.12943	0.042456	0.072988	0.24464	-0.0049191	0.026312	0.024463	0.47817	0.33149	0.03992	-0.00032066	0.86839	0.038863	0.26507	0.14016	1.0735	0.53692	0.32146	-0.080256	0.18346	-0.063594	0.11989	2.4052	0.22035	0.19938	0.13275	0.074171	0.51088	0.057554	0.30288	0.2732	-0.032374	0.038148	0.49226	0.50133	-0.062656	0.22644
59.09090909	0.023317	1.2586	0.11871	0.11658	0.057324	-0.0068673	0.092862	0.035905	0.068773	0.011328	0.36611	-0.019642	0.12706	0.036485	0.037651	0.20638	-0.0056999	0.065434	0.024033	0.48397	0.32679	0.07737	0.012707	1.0011	0.060993	0.28576	0.15529	1.0888	0.59699	0.30091	-0.06178	0.16923	-0.069905	0.087481	2.2159	0.19908	0.29057	0.12683	0.064819	0.4845	0.063563	0.32743	0.24079	-0.0095593	0.014638	0.52787	0.50498	0.0072141	0.21166
59.16305916	0.0048083	1.278	0.1172	0.12557	0.058824	-0.0024155	0.076036	0.0037185	0.070134	0.002699	0.40353	0.02387	0.11404	0.018942	0.031458	0.18605	-0.014444	0.035842	-0.00063888	0.49301	0.27733	0.11396	0.054019	1.0386	0.076052	0.2992	0.16571	1.1031	0.5771	0.3054	-0.049288	0.15172	-0.080635	0.07565	2.2026	0.19101	0.34777	0.11213	0.064911	0.48262	0.048983	0.3794	0.19278	-0.0055836	0.042689	0.56801	0.47021	0.016857	0.22725
59.23520924	-0.022277	1.2341	0.15208	0.12339	0.041014	0.05413	0.034087	0.0058649	0.061501	-0.0029132	0.3933	0.030847	0.083548	-0.0087316	0.032896	0.20231	-0.031735	-0.0098404	-0.036304	0.50541	0.27371	0.12917	0.055751	1.0388	0.087233	0.3057	0.15137	1.1036	0.52965	0.32566	-0.033371	0.1322	-0.052646	0.08909	2.1993	0.1625	0.34142	0.12159	0.026775	0.49434	0.023867	0.35888	0.19623	-0.015901	0.061229	0.5434	0.46148	0.019458	0.20262
59.30735931	-0.04991	1.1918	0.16061	0.086215	0.016603	0.06786	0.023649	0.02741	0.068576	0.013315	0.35999	0.00059253	0.062599	-0.031808	0.023391	0.25853	-0.046819	-0.019142	-0.042435	0.56039	0.3205	0.10172	0.015315	1.041	0.096241	0.32209	0.12896	1.0718	0.50921	0.33249	-0.0083132	0.11318	0.023538	0.075933	2.0983	0.12647	0.3228	0.12014	0.00080367	0.46047	0.017167	0.3165	0.20597	-0.040419	0.046406	0.5092	0.45157	0.074332	0.14476
59.37950938	-0.069663	1.1442	0.14453	0.041963	-0.021339	0.043762	0.029662	0.012487	0.095266	0.047348	0.32359	-0.020116	0.071136	-0.018664	0.0090604	0.34995	-0.049391	-0.012884	-0.030971	0.61367	0.34946	0.053518	-0.01363	1.0627	0.089732	0.34669	0.13452	1.0726	0.47681	0.2966	0.0076348	0.12693	0.066686	0.048412	1.9847	0.10978	0.31294	0.10423	0.028314	0.43108	0.025824	0.29152	0.1965	-0.056189	0.0568	0.52724	0.42895	0.1056	0.12888
59.45165945	-0.061305	1.1228	0.13808	0.028815	-0.057761	0.052241	0.034475	-0.024611	0.10275	0.06897	0.32142	-0.016524	0.093675	0.0039355	0.014579	0.39571	-0.051847	-0.022117	-0.047547	0.59356	0.35759	0.027946	-0.031306	1.12	0.061909	0.36957	0.1796	1.0483	0.44246	0.27888	-0.0078858	0.15828	0.095511	0.029335	1.9022	0.091075	0.29828	0.099621	0.021578	0.42682	0.022877	0.23459	0.20869	-0.061878	0.073495	0.53807	0.42919	0.059829	0.12915
59.52380952	-0.0098174	1.1047	0.17498	0.036249	-0.051361	0.072248	0.032553	-0.023545	0.096994	0.067543	0.36118	0.0080871	0.11742	0.01245	0.054596	0.39938	-0.074941	-0.053923	-0.056466	0.56242	0.37099	0.020601	-0.043547	1.1309	0.057612	0.32105	0.19324	1.0231	0.42731	0.28799	-0.020756	0.16593	0.17501	0.017076	1.7981	0.074704	0.26612	0.089374	0.011158	0.39946	0.0039844	0.23344	0.16521	-0.053421	0.10399	0.49495	0.44089	0.044178	0.093561
59.5959596	0.034469	1.0916	0.22048	0.058961	-0.035194	0.068832	0.033845	0.014236	0.10944	0.043464	0.403	0.048508	0.13366	0.012468	0.076531	0.39872	-0.075346	-0.04214	-0.038711	0.5472	0.35777	0.014657	-0.061911	1.0574	0.073995	0.27796	0.17122	0.99494	0.41953	0.28583	-0.058471	0.14403	0.2283	0.0062893	1.6941	0.071192	0.26041	0.090736	0.022377	0.36608	-0.030782	0.30177	0.10271	-0.020717	0.15675	0.44956	0.41677	0.053642	0.058466
59.66810967	0.063593	1.055	0.25943	0.05534	-0.013308	0.068586	0.048448	0.041913	0.11165	0.023426	0.40943	0.07091	0.11731	0.0072906	0.070231	0.4098	-0.053315	-0.011112	-0.048657	0.50683	0.31626	0.030917	-0.070098	1.0207	0.073729	0.29831	0.16219	0.95783	0.40671	0.28078	-0.06888	0.11744	0.2674	0.00011543	1.638	0.068406	0.28015	0.09683	0.014555	0.31703	-0.053537	0.34678	0.076184	-0.0039246	0.20402	0.46223	0.40213	0.025355	0.062302
59.74025974	0.075265	0.97477	0.25822	0.01591	0.03537	0.092827	0.051225	0.041211	0.085152	0.016783	0.37206	0.076763	0.092484	0.006628	0.068412	0.42243	-0.038852	0.030954	-0.058145	0.46067	0.26901	0.015354	-0.055503	1.111	0.070748	0.31984	0.17696	0.94657	0.39784	0.30124	-0.074793	0.087598	0.30995	0.01166	1.7124	0.070749	0.25935	0.074458	-0.018497	0.29167	-0.018716	0.34174	0.032156	0.011965	0.22831	0.45176	0.43382	0.054174	0.11007
59.81240981	0.045133	0.89639	0.24724	0.0080483	0.053638	0.094522	0.050258	-0.0046426	0.059979	0.024546	0.32186	0.075677	0.090355	0.0045768	0.061096	0.41913	-0.040585	0.031333	-0.042373	0.44249	0.24542	-0.0099898	-0.029367	1.1415	0.069914	0.31441	0.20259	0.8823	0.36622	0.31002	-0.086433	0.070509	0.36669	0.021001	1.9257	0.053407	0.20323	0.055326	-0.019338	0.28422	0.019214	0.28455	0.020508	0.028987	0.25886	0.38762	0.46056	0.097127	0.11712
59.88455988	0.027203	0.8391	0.2621	0.018241	0.065534	0.10854	0.044286	-0.040319	0.051179	0.042983	0.27632	0.066286	0.11895	0.0074373	0.056867	0.44209	-0.030328	-0.010864	-0.01918	0.43865	0.259	-0.020822	-0.019654	1.0536	0.053328	0.29134	0.22103	0.827	0.34983	0.27915	-0.066557	0.038773	0.42558	0.009647	2.0611	0.021247	0.18073	0.037311	-0.008569	0.28421	0.011994	0.26281	0.053197	0.044992	0.31842	0.33593	0.43526	0.099188	0.091134
59.95670996	0.049289	0.79639	0.26403	0.051809	0.092471	0.16067	0.027546	-0.039385	0.048943	0.038757	0.24546	0.050921	0.11122	0.036178	0.069542	0.45856	-0.029779	-0.033534	-0.043967	0.39427	0.2646	-0.027988	-0.046362	0.93871	0.037491	0.30535	0.2408	0.77523	0.3483	0.2459	-0.027613	0.040471	0.43037	-0.0090119	2.1049	0.010162	0.20508	0.0069219	-0.014832	0.28134	-0.01218	0.30293	0.10249	0.066473	0.37673	0.33388	0.43086	0.094506	0.090898
60.02886003	0.055255	0.75895	0.23298	0.083438	0.10323	0.17978	0.012234	-0.023285	0.06926	0.011292	0.22259	0.028068	0.097436	0.069804	0.073332	0.45245	-0.060377	-0.046431	-0.059302	0.3363	0.25979	-0.027721	-0.062565	0.91619	0.025477	0.31007	0.2583	0.7261	0.32365	0.21678	0.019742	0.053646	0.37307	-0.013712	2.125	0.058082	0.22217	0.0023661	-0.0074638	0.25507	-0.014134	0.3	0.1191	0.083507	0.41333	0.31315	0.46704	0.070334	0.10188
60.1010101	0.030794	0.69888	0.20649	0.092439	0.090717	0.16477	0.0087627	-0.011538	0.10055	0.010735	0.20291	0.015497	0.097477	0.099961	0.065689	0.41936	-0.077259	-0.041977	-0.036132	0.2762	0.2148	-0.019705	-0.033209	0.91171	0.030415	0.27869	0.22369	0.68674	0.31571	0.19329	0.059777	0.052836	0.3193	-0.011912	2.0939	0.084429	0.21966	0.018666	-0.0023014	0.24958	-0.021553	0.25533	0.090294	0.11949	0.43763	0.2792	0.48887	0.041599	0.10309
60.17316017	0.0069772	0.79001	0.19035	0.068144	0.050341	0.17201	0.001587	-0.025153	0.083511	0.018221	0.20642	0.013405	0.08982	0.11126	0.056204	0.37719	-0.055009	-0.044087	-0.025734	0.24902	0.13737	0.0046281	0.0058571	0.83794	0.043683	0.24276	0.163	0.66513	0.31346	0.20503	0.11417	0.05143	0.28214	-0.027945	1.9828	0.086067	0.23343	0.016393	0.019084	0.23268	-0.044226	0.26684	0.032712	0.14104	0.44733	0.22864	0.46756	0.0025967	0.088601
60.24531025	0.019121	0.96667	0.1889	0.051939	0.036126	0.15094	0.0057765	-0.033211	0.060497	0.0026523	0.2106	0.0099193	0.077087	0.084074	0.05133	0.37035	-0.055935	-0.057874	-0.02233	0.28299	0.13288	0.0096961	0.015726	0.78609	0.044729	0.22966	0.12429	0.66551	0.31221	0.20545	0.18591	0.059536	0.27903	-0.042684	1.906	0.19494	0.24738	-0.010919	0.10532	0.20737	-0.071569	0.31458	-0.008461	0.12432	0.45654	0.18665	0.43116	-0.051578	0.054187
60.31746032	0.052379	1.085	0.19832	0.092634	0.058821	0.10898	-0.0012471	-0.031996	0.065263	-0.014166	0.18639	0.016822	0.073449	0.059903	0.039088	0.36332	-0.088743	-0.054799	-0.02327	0.31294	0.13837	-0.021411	0.02789	0.8154	0.050599	0.2396	0.10107	0.6139	0.30138	0.172	0.23325	0.068723	0.29334	-0.041749	1.8846	0.44954	0.22051	-0.026128	0.1765	0.1899	-0.090492	0.34486	-0.0075035	0.097755	0.4565	0.1777	0.42991	-0.040904	0.011277
60.38961039	0.067805	1.1737	0.17645	0.13003	0.083718	0.09621	-0.01303	-0.048206	0.082168	-0.014234	0.16754	0.025385	0.073884	0.058948	0.036854	0.35594	-0.11214	-0.032427	-0.027435	0.29923	0.13587	-0.053119	0.0632	0.80788	0.056217	0.27326	0.094153	0.55549	0.27611	0.16245	0.19526	0.051953	0.27439	-0.03181	1.8421	0.65931	0.16933	0.0081336	0.19495	0.17936	-0.078151	0.3499	0.0046335	0.065801	0.43619	0.18837	0.46069	-0.0030379	0.0071663
60.46176046	0.062553	1.1997	0.15561	0.1075	0.12095	0.097073	-0.015213	-0.056981	0.093872	-0.0058274	0.1657	0.038041	0.065908	0.062131	0.02745	0.37134	-0.070804	-0.01246	-0.038253	0.31071	0.16788	-0.06466	0.098707	0.72199	0.064062	0.3128	0.086225	0.55432	0.26018	0.17932	0.14747	0.045853	0.20562	-0.016591	1.7846	0.76262	0.15123	0.024403	0.19935	0.17781	-0.082778	0.33487	0.033119	0.067065	0.41068	0.20888	0.51918	0.012856	0.0029475
60.53391053	0.06479	1.1615	0.16332	0.072828	0.1365	0.088707	-0.023111	-0.056903	0.09594	-0.00039405	0.14745	0.038017	0.074829	0.087874	-0.0014619	0.39832	-0.0052681	0.0078111	-0.034054	0.42075	0.23899	-0.073317	0.1137	0.63501	0.081447	0.34456	0.07681	0.55444	0.26417	0.19762	0.15011	0.07491	0.16286	0.0051086	1.7509	0.84197	0.15884	0.00039554	0.17503	0.22717	-0.079454	0.35039	0.063765	0.088916	0.414	0.17978	0.5759	-0.001336	-0.0059974
60.60606061	0.064672	1.0905	0.14454	0.048283	0.11695	0.090989	-0.031859	-0.081255	0.075759	0.019065	0.12784	-0.0012122	0.076048	0.12125	0.00062183	0.41711	0.038398	0.018565	-0.011853	0.57812	0.30086	-0.064316	0.11242	0.62099	0.11016	0.33874	0.047211	0.52711	0.2531	0.20263	0.16721	0.10922	0.17151	0.031979	1.7099	0.9204	0.14332	-0.008789	0.13111	0.34176	-0.01936	0.31711	0.087921	0.10091	0.40083	0.14246	0.57347	-0.011797	-0.017782
60.67821068	0.05137	1.0528	0.12955	0.029828	0.08409	0.077283	-0.034458	-0.10407	0.039679	0.034032	0.11869	-0.044815	0.049465	0.11572	0.017742	0.42839	0.047846	0.0096926	0.0075725	0.69491	0.30554	-0.034565	0.14381	0.64587	0.12039	0.36358	0.032511	0.48496	0.20847	0.21481	0.16292	0.10837	0.16956	0.068102	1.5983	0.9299	0.094022	-0.0056673	0.10086	0.4456	0.021978	0.28554	0.069177	0.10101	0.35859	0.14904	0.51785	0.0023724	0.0027077
60.75036075	0.032252	1.0631	0.14397	0.019188	0.051337	0.052317	-0.048667	-0.098886	0.020774	0.027988	0.089647	-0.059159	0.0352	0.10018	0.0063891	0.43761	0.037263	-0.0049601	0.0075242	0.74601	0.29216	-0.0019795	0.20743	0.62357	0.097065	0.48777	0.052827	0.48642	0.16266	0.28155	0.15162	0.10153	0.14046	0.12271	1.4561	0.88432	0.069168	-0.00017848	0.08929	0.51981	-0.0059856	0.33573	0.016222	0.12454	0.32955	0.11089	0.45719	0.020376	0.0009525
60.82251082	0.018402	1.0552	0.16525	0.040345	0.02759	0.064299	-0.038575	-0.090073	0.031608	0.0096383	0.10539	-0.068593	0.034431	0.10402	0.013544	0.44941	0.029517	-0.01531	-0.0078679	0.73944	0.27536	0.018028	0.31498	0.55565	0.074531	0.65751	0.062756	0.50625	0.1375	0.37508	0.14632	0.1033	0.11284	0.192	1.421	0.83021	0.069417	-0.014053	0.099422	0.62259	-0.029971	0.332	-0.035665	0.13266	0.31903	0.053948	0.45275	0.05885	-0.039523
60.89466089	0.047517	1.0394	0.19785	0.043602	0.040381	0.11174	-0.022904	-0.098872	0.061627	-0.0068233	0.15725	-0.083118	0.024849	0.11395	0.036242	0.44967	0.029293	-0.018034	-0.0084708	0.66919	0.27472	0.035488	0.39652	0.49011	0.07896	0.73148	0.047252	0.50357	0.16219	0.4284	0.14989	0.08575	0.11861	0.22171	1.4427	0.78806	0.070982	-0.028261	0.096425	0.81502	-0.024889	0.24946	-0.059969	0.12197	0.31395	0.047736	0.48856	0.14546	-0.055405
60.96681097	0.075039	1.0668	0.20344	0.053206	0.059702	0.15298	-0.045605	-0.11652	0.052745	0.0035066	0.21534	-0.07985	0.028687	0.12739	0.062354	0.43891	0.027071	-0.021124	-0.0034165	0.6488	0.26197	0.070033	0.39989	0.45747	0.12097	0.71114	0.053116	0.48151	0.22493	0.44194	0.14175	0.069521	0.12107	0.23289	1.4293	0.74051	0.063725	-0.014489	0.075806	1.0119	-0.014595	0.21823	-0.037767	0.14007	0.35398	0.065234	0.51842	0.21795	-0.059937
61.03896104	0.041649	1.0638	0.15131	0.057162	0.062293	0.17428	-0.055024	-0.13356	0.0076705	0.0077416	0.28841	-0.043097	0.028798	0.13485	0.095363	0.44776	0.0093227	-0.025843	-0.022971	0.73935	0.27078	0.11028	0.34582	0.44482	0.16989	0.67613	0.075428	0.44662	0.28041	0.44955	0.13833	0.06045	0.063075	0.24631	1.3562	0.67439	0.068251	0.018529	0.071614	1.1242	-0.018315	0.24275	0.02622	0.15547	0.41666	0.043009	0.53105	0.23988	-0.095803
61.11111111	0.0055805	0.98619	0.13097	0.052384	0.04868	0.16406	-0.047513	-0.10945	-0.02477	-0.001287	0.32221	-0.0021742	0.027648	0.14277	0.18038	0.49218	0.0021644	-0.035735	-0.039215	0.85437	0.31677	0.12692	0.32427	0.39133	0.20384	0.66157	0.091612	0.43345	0.30243	0.44655	0.1475	0.073874	0.0044497	0.24675	1.2708	0.60512	0.072552	0.039753	0.072088	1.1495	-0.043282	0.22519	0.056835	0.16235	0.41079	0.022128	0.54975	0.18187	-0.13519
61.18326118	0.02216	0.90242	0.16694	0.073482	0.034094	0.14188	-0.04145	-0.074696	-0.030919	-0.0025001	0.33597	0.014732	0.028066	0.16468	0.27281	0.52479	0.02719	-0.052953	-0.041514	0.98084	0.35406	0.13039	0.34206	0.32595	0.20466	0.61885	0.087367	0.43103	0.29495	0.44628	0.18199	0.10339	-0.0066782	0.2692	1.2121	0.56484	0.043533	0.049207	0.074253	1.1557	-0.095344	0.18873	0.024098	0.162	0.36518	0.051638	0.55102	0.10526	-0.12847
61.25541126	0.057483	0.88412	0.18018	0.089519	0.055439	0.13005	-0.042322	-0.066578	-0.017501	-0.010883	0.34906	-0.0085603	0.030387	0.18592	0.30578	0.50096	0.034652	-0.062235	-0.069125	1.1321	0.34222	0.14724	0.4006	0.32801	0.17051	0.53529	0.086487	0.36276	0.27391	0.44423	0.19114	0.11995	-0.0011769	0.28508	1.1774	0.522	0.0064254	0.0186	0.056694	1.1862	-0.10671	0.13818	-0.01986	0.14817	0.34203	0.089387	0.50174	0.13079	-0.08272
61.32756133	0.049073	0.88713	0.16872	0.078443	0.058763	0.12687	-0.044967	-0.041766	-0.00040853	-0.020017	0.32976	-0.0068556	0.026483	0.17774	0.32793	0.44663	0.031403	-0.073537	-0.071889	1.2214	0.34274	0.16589	0.45757	0.35863	0.13171	0.5106	0.11081	0.29154	0.25464	0.42154	0.16785	0.11634	-0.02177	0.27385	1.1156	0.47603	-8.30E-05	-0.015245	0.041577	1.1963	-0.05207	0.088293	-0.023007	0.16345	0.30546	0.11905	0.49201	0.17067	-0.085441
61.3997114	0.0074866	0.88215	0.15323	0.077444	0.042396	0.097274	-0.044924	-0.019572	-0.00090847	-0.019352	0.30149	0.037729	0.02476	0.14508	0.35642	0.4157	0.034036	-0.065452	-0.024014	1.2121	0.34559	0.16272	0.43853	0.32014	0.10811	0.51131	0.12567	0.29056	0.25002	0.37691	0.15413	0.11812	-0.031036	0.27165	1.0384	0.44511	0.011284	0.014126	0.063976	1.2239	-0.019854	0.088935	0.010712	0.21652	0.26261	0.12259	0.57279	0.15618	-0.12043
61.47186147	0.011859	0.90538	0.12546	0.071599	0.045944	0.088981	-0.034907	-0.050662	0.0048345	-0.0066302	0.30148	0.044296	0.04839	0.17555	0.35893	0.39384	0.070058	-0.033373	0.0121	1.1118	0.30305	0.11747	0.37994	0.27233	0.088876	0.53571	0.13148	0.33055	0.24039	0.35281	0.15006	0.10778	-0.016783	0.26521	0.98348	0.40544	0.0076711	0.059118	0.068417	1.3016	-0.03219	0.12471	0.013859	0.22527	0.28885	0.092068	0.6357	0.1445	-0.15094
61.54401154	0.038507	0.90064	0.10251	0.077257	0.073402	0.11751	-0.020399	-0.07995	0.034502	0.027477	0.29804	0.013342	0.073431	0.30223	0.34052	0.36168	0.14651	-0.011248	0.020177	1.0971	0.24678	0.069212	0.32559	0.25313	0.076878	0.55248	0.12992	0.3481	0.2255	0.33269	0.15594	0.086274	-0.033235	0.23704	0.98596	0.35234	-0.015237	0.070883	0.026114	1.3274	-0.050967	0.13645	0.019497	0.19081	0.30477	0.072505	0.59913	0.13555	-0.14035
61.61616162	0.04744	0.85439	0.081039	0.08739	0.11273	0.13174	0.0061392	-0.069743	0.05	0.0077508	0.27848	0.015655	0.078738	0.44355	0.34609	0.32452	0.19052	-0.006304	0.056561	1.0878	0.20605	0.069287	0.33741	0.27462	0.081523	0.53333	0.13088	0.32517	0.17869	0.2986	0.16281	0.085567	-0.081423	0.20772	0.99116	0.32786	-0.03293	0.075054	-0.0068308	1.274	-0.054189	0.096249	0.017152	0.17273	0.26148	0.064822	0.54116	0.095271	-0.089789
61.68831169	0.070248	0.75609	0.077274	0.084933	0.13676	0.12125	0.024554	-0.033435	0.069555	-0.040096	0.28849	0.056199	0.075796	0.53031	0.36996	0.26737	0.20439	-0.021245	0.089484	1.0461	0.17384	0.09681	0.38557	0.27514	0.077017	0.50114	0.13011	0.29772	0.12648	0.29527	0.15368	0.086421	-0.10199	0.19921	0.96051	0.3192	-0.021533	0.085477	0.0029973	1.2248	-0.041318	0.0673	-0.030533	0.16778	0.22101	0.050723	0.51658	0.079426	-0.022774
61.76046176	0.087067	0.67822	0.0868	0.090255	0.13342	0.18239	0.025119	-0.0026953	0.089061	-0.061092	0.31076	0.098418	0.079567	0.56315	0.42812	0.20817	0.22804	-0.029003	0.10627	0.97583	0.14793	0.15147	0.41452	0.23416	0.058852	0.50346	0.12672	0.30466	0.12251	0.29904	0.12017	0.083854	-0.066804	0.23699	0.92349	0.30461	-0.014749	0.12044	0.051474	1.2611	-0.040776	0.087244	-0.056339	0.15653	0.23372	0.041363	0.50592	0.080789	0.017859
61.83261183	0.074638	0.60782	0.081099	0.10378	0.10395	0.32669	0.015887	-0.005687	0.10149	-0.048287	0.33056	0.095092	0.078518	0.54352	0.51574	0.18255	0.23814	-0.028346	0.11903	0.95084	0.141	0.24241	0.44129	0.2101	0.057123	0.48319	0.12838	0.3156	0.13216	0.28075	0.11338	0.091237	-0.057642	0.32037	0.8825	0.27549	-0.031295	0.1519	0.05916	1.3776	-0.060667	0.080194	-0.02651	0.18243	0.25854	0.063597	0.52388	0.09708	0.018162
61.9047619	0.041607	0.55018	0.063039	0.10817	0.063665	0.41619	0.01062	-0.014581	0.11158	-0.012549	0.32465	0.082077	0.077795	0.50773	0.56804	0.17367	0.20796	-0.022618	0.1289	0.91421	0.11923	0.34224	0.46898	0.15009	0.076794	0.44198	0.1385	0.31355	0.14233	0.27381	0.10856	0.10697	-0.078892	0.37886	0.8221	0.23655	-0.027302	0.12696	0.015958	1.5628	-0.077405	0.061316	0.019974	0.18563	0.21442	0.086876	0.56148	0.16943	-0.0024775
61.97691198	0.011326	0.53569	0.030673	0.14712	0.038015	0.45538	0.0051678	-0.0026297	0.10936	0.019406	0.31396	0.090867	0.080963	0.49685	0.57471	0.18399	0.17501	0.01311	0.1572	0.86074	0.087286	0.40545	0.46253	0.11227	0.09647	0.42445	0.15022	0.32016	0.16701	0.29546	0.073415	0.10262	-0.085256	0.39129	0.76698	0.22488	0.0060524	0.11335	0.011224	1.6406	-0.077259	0.047969	0.029843	0.16203	0.1263	0.081239	0.60402	0.32542	-0.022141
62.04906205	0.012538	0.50463	-0.0024111	0.16998	0.013305	0.48646	0.01758	0.021004	0.09082	0.039245	0.3014	0.09683	0.085282	0.47149	0.56292	0.18649	0.16059	0.032267	0.15131	0.81592	0.093441	0.41809	0.41721	0.10109	0.11408	0.44007	0.16871	0.34745	0.23165	0.28108	0.031819	0.0964	-0.065869	0.39642	0.73066	0.23234	0.031119	0.1397	0.051289	1.6472	-0.045808	0.014656	-0.0083657	0.17494	0.097758	0.081097	0.58392	0.53014	-0.0063865
62.12121212	0.027867	0.47692	-0.0146	0.16231	-0.015946	0.48614	0.028123	0.012932	0.098446	0.037461	0.27123	0.088151	0.081671	0.39788	0.56722	0.16082	0.1078	0.010715	0.12701	0.8039	0.10268	0.4401	0.40596	0.12472	0.14845	0.44623	0.19714	0.36332	0.39036	0.26257	0.016869	0.092847	-0.057976	0.40747	0.69531	0.23431	0.053235	0.15083	0.065219	1.6874	-0.03113	-0.00099456	0.0022474	0.19193	0.10162	0.10636	0.53863	0.6886	-0.0056175
62.19336219	0.042232	0.49249	-0.0067394	0.17812	-0.024151	0.47983	0.017603	0.0048781	0.099122	0.031864	0.2577	0.083205	0.063161	0.33716	0.57854	0.14073	0.053753	-0.0028931	0.14992	0.87749	0.11113	0.52284	0.41016	0.10043	0.19355	0.42356	0.21843	0.32806	0.62564	0.25347	0.007371	0.089165	-0.089288	0.41916	0.64842	0.23528	0.067752	0.12724	0.051197	1.7306	-0.042415	-0.010664	0.050267	0.21454	0.09198	0.16023	0.50728	0.7164	-0.0092313
62.26551227	0.05781	0.50918	0.0139	0.18982	-0.020367	0.51334	0.02823	0.031254	0.094992	0.027591	0.25072	0.083711	0.052876	0.31052	0.56743	0.13129	0.061635	-0.018048	0.20515	1.0902	0.12346	0.61647	0.40628	0.051147	0.25098	0.39123	0.22134	0.28136	0.84229	0.22575	-0.0074127	0.098147	-0.092611	0.42576	0.60505	0.22946	0.071673	0.080334	0.044997	1.7263	-0.029738	0.0091219	0.027017	0.2255	0.060329	0.19664	0.50356	0.73039	0.014755
62.33766234	0.10557	0.51538	0.028592	0.1991	-0.027108	0.54323	0.058336	0.042576	0.11059	0.027596	0.24834	0.08129	0.054745	0.2811	0.53405	0.12009	0.084562	-0.04574	0.2008	1.3372	0.17256	0.71009	0.40107	0.027619	0.30564	0.37249	0.23724	0.26429	0.9645	0.21261	0.0013119	0.12717	-0.10562	0.41682	0.57881	0.21197	0.065884	0.048814	0.016225	1.7093	-0.015109	0.074778	0.051615	0.20797	0.078387	0.19829	0.53229	0.82736	0.009692
62.40981241	0.17608	0.5303	0.014791	0.17994	-0.017613	0.5343	0.049886	0.028561	0.11262	0.019105	0.24791	0.071168	0.07452	0.26245	0.5193	0.12531	0.063774	-0.049391	0.16454	1.4929	0.23552	0.79368	0.39058	0.032434	0.34123	0.38453	0.24045	0.26952	0.94767	0.22089	0.017024	0.15877	-0.13936	0.40066	0.55065	0.18258	0.073487	0.040395	-0.00079308	1.7828	-0.020744	0.13651	0.11795	0.15962	0.11286	0.22927	0.54044	0.88491	0.02612
62.48196248	0.22504	0.55589	-0.021617	0.15733	0.0052956	0.49306	0.015526	0.018786	0.088701	0.023817	0.24349	0.04895	0.093423	0.24603	0.49639	0.14283	0.04163	-0.02542	0.18312	1.5366	0.25081	0.85122	0.38741	0.019791	0.34634	0.3981	0.21	0.2754	0.87101	0.22939	0.036432	0.1734	-0.1382	0.36496	0.51853	0.16575	0.10039	0.056952	0.0060487	1.869	-0.045155	0.17094	0.12003	0.071825	0.13205	0.28138	0.51899	0.89521	0.068117
62.55411255	0.2861	0.53133	-0.042975	0.13443	0.0013697	0.44047	-0.020753	0.0051644	0.074263	0.038529	0.24917	0.046296	0.097176	0.22747	0.43794	0.16077	0.026759	-0.027827	0.23055	1.4627	0.22567	0.88162	0.42652	0.012619	0.33407	0.39788	0.19887	0.27826	0.82086	0.21295	0.047916	0.1784	-0.13789	0.34323	0.47655	0.15329	0.12253	0.10455	0.019029	1.9361	-0.098453	0.20883	0.073252	0.019634	0.15889	0.30776	0.52	0.88523	0.057745
62.62626263	0.34489	0.47768	-0.041491	0.12983	0.000575	0.42244	-0.036517	-0.021635	0.099729	0.070519	0.29282	0.037926	0.10475	0.20304	0.3773	0.16602	0.03124	-0.021794	0.24889	1.3612	0.19113	0.89213	0.45474	-0.043475	0.31652	0.38907	0.19768	0.31421	0.75182	0.19296	0.070742	0.19058	-0.16769	0.34915	0.43462	0.14876	0.1201	0.1691	0.034795	1.986	-0.13959	0.24518	0.026393	0.017905	0.17854	0.25768	0.59783	0.91486	0.028533
62.6984127	0.32937	0.43599	-0.029882	0.10435	0.010044	0.4092	-0.027122	-0.046009	0.11453	0.14456	0.34507	0.02079	0.11898	0.16638	0.32794	0.1648	0.03754	0.0055553	0.26135	1.3128	0.19012	0.84978	0.40546	-0.071396	0.26395	0.36294	0.17986	0.38028	0.69077	0.18659	0.12375	0.18722	-0.1543	0.38405	0.40624	0.16394	0.10578	0.20512	0.022829	1.977	-0.10981	0.26808	0.057658	0.070279	0.18523	0.23481	0.71793	0.95123	-0.0025271
62.77056277	0.29846	0.4088	-0.011055	0.087742	0.0038468	0.38315	-0.030197	-0.039611	0.11974	0.23593	0.33686	0.020607	0.11371	0.15129	0.28638	0.15719	0.0092808	0.047881	0.29782	1.2819	0.209	0.76781	0.31394	-0.060072	0.20357	0.33779	0.1631	0.40795	0.68636	0.18736	0.18344	0.15431	-0.092301	0.42502	0.4028	0.17836	0.11063	0.20927	-0.0032895	1.9363	-0.062856	0.25915	0.13538	0.14385	0.1825	0.26883	0.79779	0.92647	-0.019202
62.84271284	0.29277	0.36874	0.0090452	0.092477	-0.015204	0.35783	-0.046729	-0.010579	0.13035	0.35876	0.32639	0.045671	0.10496	0.14355	0.24103	0.14238	-0.022065	0.10374	0.33275	1.2081	0.25916	0.69	0.25134	-0.023933	0.17328	0.37529	0.17312	0.39252	0.70542	0.18321	0.24235	0.13368	-0.06494	0.45165	0.42806	0.20781	0.13914	0.1915	-0.0060993	1.8798	-0.056204	0.2869	0.18314	0.15177	0.13201	0.28038	0.80378	0.95149	0.0070173
62.91486291	0.25796	0.3322	0.021259	0.078486	-0.030894	0.32179	-0.062284	-0.0047444	0.11071	0.49991	0.32221	0.054064	0.1224	0.12497	0.2414	0.13343	-0.028437	0.12897	0.3328	1.2084	0.34525	0.63171	0.22508	-0.019552	0.15487	0.48853	0.2016	0.37993	0.69426	0.18621	0.27773	0.13672	-0.064967	0.481	0.45344	0.21857	0.18434	0.16187	-0.018775	1.7884	-0.084564	0.302	0.19108	0.13211	0.069759	0.28305	0.74003	1.0936	0.017535
62.98701299	0.24571	0.36007	0.0078842	0.079935	-0.040782	0.28843	-0.056076	0.024513	0.078873	0.57983	0.30174	0.049263	0.13018	0.10608	0.2526	0.15741	-0.023646	0.12596	0.35992	1.1734	0.4058	0.59085	0.19755	-0.052039	0.11834	0.59188	0.24931	0.35813	0.68038	0.18168	0.26951	0.1328	-0.050298	0.49217	0.46193	0.20627	0.21241	0.12155	-0.024893	1.7481	-0.070003	0.30665	0.1834	0.12896	0.052663	0.27301	0.72667	1.1845	0.041568
63.05916306	0.28052	0.46254	-0.013761	0.10676	-0.044034	0.26502	-0.039943	0.11521	0.072637	0.62741	0.27794	0.037221	0.13027	0.10346	0.24202	0.19347	-0.038188	0.15626	0.41945	1.0545	0.38394	0.55014	0.17706	-0.071399	0.11842	0.65247	0.30326	0.32565	0.6289	0.18835	0.25126	0.12918	-0.014333	0.48091	0.46622	0.18933	0.20575	0.10129	-0.016066	1.7121	-0.0084925	0.32749	0.16985	0.13154	0.065299	0.23164	0.76606	1.1932	0.10173
63.13131313	0.26725	0.5581	-0.023545	0.11849	-0.0086746	0.28008	-0.049044	0.24327	0.061153	0.63508	0.26262	0.006173	0.11116	0.10148	0.23676	0.19003	-0.033333	0.18082	0.39928	0.98746	0.31155	0.52093	0.18854	-0.077959	0.19123	0.66348	0.30696	0.26875	0.62928	0.18782	0.24916	0.11064	0.054373	0.472	0.45456	0.17602	0.21601	0.10829	-0.022387	1.6104	-0.012893	0.2884	0.13571	0.12965	0.049383	0.25412	0.80027	1.2031	0.082724
63.2034632	0.21815	0.57808	-0.026791	0.11645	0.018456	0.308	-0.053477	0.3829	0.066244	0.63282	0.25866	-0.0092691	0.043644	0.0982	0.25249	0.17584	-0.038557	0.14248	0.30844	0.96197	0.2599	0.51278	0.18528	-0.095214	0.2734	0.66605	0.28744	0.23891	0.61956	0.19208	0.2642	0.090131	0.17126	0.47556	0.42028	0.16515	0.23212	0.13921	-0.036414	1.5628	-0.065535	0.22454	0.12518	0.13339	0.035198	0.29201	0.78014	1.1652	0.035172
63.27561328	0.1956	0.52537	-0.042167	0.099305	0.016758	0.30321	-0.043518	0.53682	0.084557	0.61964	0.26251	-0.00821	-0.0053971	0.10423	0.26241	0.17375	-0.064218	0.11934	0.27407	0.87351	0.24412	0.51325	0.17429	-0.096585	0.32657	0.66805	0.27404	0.26855	0.62803	0.23925	0.25182	0.097744	0.29215	0.46902	0.42048	0.16357	0.2201	0.15301	-0.046493	1.5536	-0.089625	0.23366	0.13497	0.17676	0.065809	0.25028	0.74803	1.1026	0.029603
63.34776335	0.19784	0.44215	-0.035667	0.083514	0.0025478	0.2848	-0.041772	0.6675	0.0805	0.57223	0.22564	0.0042093	0.0098994	0.11712	0.28937	0.19793	-0.074203	0.15129	0.24839	0.76876	0.25518	0.50971	0.19276	-0.11307	0.35735	0.63459	0.26355	0.31815	0.56688	0.26447	0.20344	0.10323	0.35059	0.43422	0.45617	0.15834	0.20396	0.19667	-0.04973	1.5011	-0.057071	0.26331	0.13621	0.18078	0.075645	0.21165	0.78042	1.0568	0.015715
63.41991342	0.19965	0.42896	0.010596	0.072629	-0.03995	0.23627	-0.038092	0.70832	0.05274	0.53496	0.19707	-0.0075445	0.051452	0.11383	0.37622	0.21138	-0.06776	0.15873	0.1954	0.76311	0.26237	0.51797	0.23599	-0.10677	0.35046	0.60458	0.24881	0.36449	0.56714	0.25919	0.1519	0.083958	0.34677	0.38171	0.46689	0.12579	0.18752	0.29641	-0.032691	1.3925	-0.025382	0.22752	0.12315	0.13663	0.054758	0.21555	0.80794	1.0516	-0.014913
63.49206349	0.18387	0.496	0.038316	0.045736	-0.05935	0.17912	-0.029676	0.73315	0.089085	0.51265	0.19368	-0.01389	0.076595	0.12189	0.47112	0.20487	-0.073977	0.13622	0.16106	0.79742	0.27112	0.51269	0.27948	-0.10268	0.3198	0.59704	0.23685	0.40183	0.57382	0.24803	0.12677	0.063228	0.299	0.32947	0.46256	0.098988	0.15909	0.38932	-0.032362	1.3001	-0.01933	0.18804	0.10043	0.11484	0.041646	0.20154	0.75191	0.99188	-0.029303
63.56421356	0.14668	0.54373	0.023505	0.023528	-0.023761	0.18303	-0.0419	0.70178	0.13889	0.49795	0.1994	0.0026769	0.089958	0.15558	0.51356	0.20442	-0.076893	0.12075	0.1615	0.7658	0.27715	0.48276	0.31256	-0.085598	0.30649	0.57669	0.22363	0.4061	0.5136	0.23884	0.14089	0.047305	0.24384	0.31192	0.45768	0.090956	0.13369	0.41196	-0.029165	1.2582	-0.0054571	0.1969	0.12133	0.12337	0.037102	0.1378	0.67969	0.92144	0.0020889
63.63636364	0.1268	0.51637	0.0066592	0.0041512	0.013323	0.2096	-0.027324	0.68783	0.1331	0.45684	0.18148	-0.0041423	0.089944	0.16879	0.47398	0.18984	-0.059804	0.11031	0.17326	0.70915	0.27873	0.47317	0.3559	-0.090511	0.31006	0.56829	0.21397	0.38584	0.45183	0.26213	0.16924	0.043203	0.24386	0.29193	0.43568	0.099209	0.11723	0.40168	0.019726	1.1784	0.0072471	0.2138	0.16038	0.13808	0.052502	0.10571	0.6805	0.97384	0.052677
63.70851371	0.11625	0.47948	0.0078476	-0.0089985	0.028289	0.21397	-0.003779	0.67933	0.1146	0.40139	0.14906	-0.021936	0.11297	0.15052	0.41488	0.16342	-0.059398	0.097065	0.19455	0.66782	0.28659	0.47015	0.39976	-0.082293	0.3244	0.57058	0.19254	0.35584	0.42594	0.29507	0.19276	0.053143	0.27276	0.26921	0.42049	0.11495	0.1088	0.39197	0.064712	1.0765	0.0055897	0.20668	0.17997	0.1291	0.049084	0.10783	0.66949	0.9576	0.11574
63.78066378	0.082146	0.4694	0.0075103	0.0033984	0.040777	0.18706	-0.0047907	0.71399	0.1027	0.39096	0.11107	-0.02984	0.15988	0.12249	0.41017	0.14874	-0.077396	0.10453	0.20089	0.66115	0.32235	0.45296	0.41847	-0.086398	0.32488	0.58332	0.1627	0.31661	0.45451	0.30129	0.2163	0.071097	0.27439	0.24247	0.41003	0.13511	0.095518	0.3889	0.065428	1.0765	-0.0041207	0.1863	0.12075	0.083494	0.049509	0.11767	0.67733	0.7959	0.15419
63.85281385	0.055478	0.45642	-0.010938	0.018372	0.031184	0.1379	-0.011153	0.72878	0.095485	0.39319	0.091605	-0.028029	0.17082	0.11237	0.4061	0.11277	-0.074434	0.11286	0.19256	0.64827	0.30749	0.41663	0.37363	-0.11183	0.30937	0.55582	0.13642	0.2632	0.48717	0.29346	0.21965	0.093653	0.27893	0.21393	0.38093	0.12729	0.064162	0.41831	0.061415	1.09	0.0062704	0.16907	0.083191	0.06561	0.065744	0.12469	0.72341	0.63809	0.1268
63.92496392	0.058693	0.45446	-0.033595	0.044756	0.016207	0.1	-0.015645	0.68006	0.080547	0.39903	0.10582	-0.040161	0.13721	0.10115	0.36807	0.083797	-0.032349	0.089951	0.17143	0.61428	0.29091	0.39192	0.34014	-0.12864	0.30573	0.52379	0.12185	0.21444	0.4672	0.25102	0.19728	0.12286	0.30643	0.18961	0.33887	0.11096	0.040048	0.46654	0.054851	1.1133	0.058052	0.17363	0.13849	0.064465	0.056308	0.1453	0.69171	0.51732	0.10339
63.997114	0.082881	0.44444	-0.021058	0.055276	0.0073432	0.10542	-0.015195	0.61333	0.066404	0.36509	0.12043	-0.048179	0.098305	0.10652	0.30732	0.080775	0.0062959	0.079667	0.16408	0.60068	0.27383	0.36637	0.3455	-0.11392	0.33396	0.54659	0.12225	0.21979	0.43855	0.20939	0.19454	0.1354	0.32347	0.16891	0.30725	0.12866	0.044298	0.5244	0.043793	1.2288	0.082643	0.15159	0.14113	0.03885	0.053323	0.1726	0.64357	0.40647	0.092165
64.06926407	0.10306	0.39624	0.020409	0.061785	0.025889	0.14167	-0.019123	0.56074	0.057342	0.30368	0.13083	-0.035447	0.069786	0.12073	0.28065	0.090087	0.015588	0.077188	0.15202	0.61589	0.23805	0.3344	0.33666	-0.070438	0.3341	0.56692	0.12479	0.22116	0.42362	0.19911	0.24254	0.13579	0.30974	0.14805	0.29715	0.1546	0.042431	0.57597	0.025457	1.3889	0.071406	0.13626	0.088748	0.050915	0.050974	0.19982	0.66478	0.35181	0.072846
64.14141414	0.10581	0.34059	0.042499	0.061367	0.033673	0.1437	-0.029949	0.51843	0.053111	0.25344	0.16601	-0.014446	0.043196	0.11656	0.3017	0.093436	0.011093	0.050617	0.10551	0.61672	0.20363	0.30755	0.32313	-0.024703	0.28408	0.58916	0.12901	0.19108	0.40523	0.23725	0.30807	0.11566	0.30944	0.12611	0.31629	0.16042	0.028907	0.59579	0.018558	1.4178	0.033674	0.12747	0.067448	0.10883	0.017152	0.16614	0.68954	0.35853	0.069224
64.21356421	0.083996	0.306	0.027879	0.08712	0.027094	0.11828	-0.020837	0.49188	0.046998	0.21775	0.20208	-0.00034854	0.024329	0.060985	0.33507	0.080253	0.016744	0.027442	0.08556	0.58579	0.19154	0.29824	0.29816	0.043305	0.24208	0.59186	0.14519	0.17757	0.40874	0.27631	0.31912	0.074878	0.3638	0.11827	0.33086	0.14826	0.017914	0.5813	0.034495	1.2909	0.0053984	0.14783	0.11226	0.15407	0.007658	0.15392	0.71822	0.32507	0.063991
64.28571429	0.044719	0.28557	0.0095212	0.10863	0.03319	0.12671	0.0080202	0.46668	0.047654	0.206	0.18894	0.0022562	0.0028187	0.027061	0.37229	0.068605	0.02694	0.013743	0.087568	0.55063	0.21955	0.31335	0.26421	0.1192	0.24392	0.59099	0.15736	0.19365	0.38543	0.2979	0.2719	0.064232	0.40001	0.10636	0.34147	0.12712	0.019698	0.56714	0.012809	1.2079	0.025576	0.15194	0.16628	0.19022	0.028133	0.16298	0.7659	0.25991	0.064633
64.35786436	0.004931	0.28655	0.0020257	0.075106	0.025705	0.14887	0.018454	0.44786	0.055348	0.2201	0.1382	0.0080389	-0.022044	0.035797	0.38845	0.071663	0.031611	-0.012496	0.077455	0.52861	0.3188	0.29949	0.23702	0.16025	0.27533	0.61078	0.1606	0.18728	0.35017	0.30279	0.24362	0.074053	0.39253	0.14864	0.34271	0.10168	0.014506	0.5424	0.0022864	1.2189	0.043086	0.099243	0.16279	0.17146	0.048427	0.14684	0.73992	0.24509	0.10257
64.43001443	0.00099014	0.29588	-0.015292	0.064215	-0.0011723	0.15837	0.020718	0.43431	0.07034	0.25111	0.11812	0.0041955	-0.032443	0.037514	0.41293	0.080749	0.025954	-0.029018	0.073613	0.48584	0.493	0.26788	0.22709	0.174	0.28962	0.68481	0.17395	0.16067	0.37537	0.28675	0.23508	0.076677	0.37236	0.28473	0.35677	0.084596	0.0029356	0.51554	0.031652	1.2694	0.054719	0.053982	0.12558	0.11095	0.048535	0.16748	0.66124	0.21809	0.12193
64.5021645	0.04364	0.28381	-0.029968	0.080247	-0.022512	0.11832	0.032654	0.39944	0.093446	0.25632	0.11428	-0.0024737	-0.044195	0.025306	0.44349	0.050089	-0.00028073	-0.030161	0.061193	0.4272	0.60724	0.23614	0.22479	0.15009	0.27052	0.75942	0.19955	0.14725	0.41303	0.26844	0.22222	0.083472	0.38203	0.37321	0.35648	0.081918	0.00051823	0.48712	0.051888	1.2373	0.10127	0.07694	0.11531	0.079307	0.026691	0.1606	0.66426	0.21632	0.10207
64.57431457	0.077392	0.28332	-0.012576	0.090947	-0.03746	0.09016	0.048578	0.37602	0.079273	0.22825	0.10105	0.023011	-0.04779	0.019322	0.48046	0.030041	-0.038869	-0.043944	-0.0084506	0.40199	0.61335	0.21516	0.21205	0.10385	0.24253	0.77862	0.22216	0.14301	0.39701	0.25928	0.2168	0.095441	0.44474	0.38621	0.31262	0.062752	-0.0051885	0.44015	0.042584	1.1394	0.086988	0.10985	0.11348	0.094246	0.033354	0.10321	0.67869	0.34272	0.095526
64.64646465	0.093282	0.27325	-0.0027297	0.094607	-0.044343	0.13265	0.075683	0.37412	0.069269	0.21055	0.12265	0.042438	-0.031548	0.027021	0.54281	0.035476	-0.059666	-0.070045	-0.029091	0.40354	0.57916	0.20895	0.19907	0.083392	0.22784	0.77145	0.23243	0.12732	0.35311	0.2581	0.19887	0.10477	0.51188	0.42358	0.25988	0.041986	-0.027285	0.41108	0.023021	1.1094	0.036758	0.11441	0.12782	0.10226	0.078268	0.05799	0.63073	0.5326	0.10679
64.71861472	0.091225	0.23881	-0.02056	0.088985	-0.047078	0.17842	0.085767	0.35904	0.062212	0.19002	0.17337	0.066456	-0.0015729	0.034634	0.59077	0.047622	-0.070836	-0.068758	-0.00271	0.38166	0.54647	0.19208	0.18323	0.083616	0.2143	0.77756	0.25874	0.11884	0.34339	0.2438	0.18259	0.10003	0.51757	0.50145	0.23653	0.047856	-0.057324	0.3684	0.0037204	1.1806	0.012623	0.098057	0.1448	0.10843	0.14508	0.042172	0.60372	0.586	0.11143
64.79076479	0.084488	0.20726	-0.028641	0.063808	-0.039435	0.16567	0.063642	0.31694	0.073604	0.16057	0.20223	0.090022	0.018781	0.050427	0.58305	0.047856	-0.048799	-0.052963	0.024559	0.33419	0.51706	0.16793	0.18125	0.095386	0.19999	0.78554	0.27721	0.12033	0.32821	0.21876	0.15427	0.076235	0.48079	0.52025	0.23018	0.033612	-0.074741	0.31435	-0.0075772	1.2364	-0.013922	0.09539	0.12597	0.10199	0.16693	0.062535	0.6275	0.52182	0.10105
64.86291486	0.046634	0.1669	-0.0086477	0.049144	-0.032872	0.13366	0.057091	0.26835	0.08962	0.1252	0.2013	0.078018	0.020861	0.049001	0.55124	0.038158	0.0077769	-0.051801	0.028709	0.32429	0.48041	0.17081	0.17796	0.091155	0.17211	0.75693	0.26253	0.13829	0.30841	0.18474	0.11893	0.060997	0.42213	0.46795	0.20384	0.016806	-0.065843	0.30541	-0.022459	1.2368	-0.016885	0.082203	0.10967	0.059436	0.12185	0.061063	0.65071	0.41635	0.07963
64.93506494	0.020061	0.1344	0.004272	0.04553	-0.044492	0.13608	0.052088	0.25513	0.08474	0.10598	0.21633	0.041286	0.010274	0.033194	0.54946	0.034908	0.010636	-0.062274	0.025106	0.36379	0.4301	0.16843	0.16683	0.087019	0.11539	0.70499	0.24496	0.18176	0.34988	0.16019	0.11059	0.071413	0.38258	0.44172	0.16766	0.025599	-0.044484	0.30667	-0.017843	1.2743	0.02351	0.056221	0.08385	0.055226	0.10253	0.074601	0.61474	0.41391	0.068431
65.00721501	0.015362	0.13189	-0.0070333	0.048284	-0.053761	0.14607	0.013055	0.23683	0.061896	0.096535	0.22499	0.0094383	0.00057623	0.0056953	0.56713	0.042311	-0.051789	-0.052991	0.024497	0.35868	0.38694	0.14801	0.17459	0.087283	0.068149	0.65991	0.24375	0.20631	0.43395	0.1735	0.12173	0.081805	0.4259	0.44549	0.14827	0.036568	-0.044104	0.28312	-0.0097975	1.3046	0.045687	0.019666	0.043309	0.10453	0.10485	0.11973	0.58461	0.50072	0.065882
65.07936508	0.022338	0.15479	0.00085473	0.028664	-0.052432	0.15686	-0.016285	0.20425	0.039328	0.07412	0.22092	0.015582	0.0024843	-0.025512	0.54902	0.060727	-0.08985	-0.032292	0.015352	0.33393	0.37018	0.14752	0.17741	0.095001	0.054584	0.69946	0.25964	0.17915	0.46276	0.16797	0.12693	0.072668	0.53277	0.43357	0.13516	0.012435	-0.058629	0.28231	0.0079857	1.2362	0.038604	0.0025441	0.021987	0.11082	0.093584	0.12413	0.62928	0.61522	0.078533
65.15151515	0.058176	0.23722	0.010382	0.013707	-0.030838	0.17426	-0.0037079	0.18976	0.048382	0.056982	0.19588	0.020352	0.0092087	-0.02553	0.53298	0.070321	-0.096412	-0.027801	0.00071874	0.32704	0.36288	0.15814	0.17507	0.10586	0.044628	0.74597	0.28495	0.14583	0.38841	0.16254	0.12819	0.068447	0.56383	0.39649	0.11264	-0.025244	-0.057808	0.28274	0.037452	1.174	0.037038	0.029617	0.0034044	0.081408	0.07077	0.10108	0.60725	0.78402	0.11215
65.22366522	0.073645	0.33712	0.03615	0.019419	-0.018914	0.17081	0.02079	0.19568	0.049077	0.071839	0.18341	0.019508	0.026725	-0.01004	0.5119	0.066211	-0.080926	-0.054331	-0.011092	0.28471	0.35487	0.18216	0.16543	0.10662	0.014976	0.72523	0.27403	0.14805	0.31888	0.15723	0.11996	0.055139	0.53505	0.38346	0.10984	-0.024724	-0.05589	0.23795	0.094038	1.224	0.021884	0.057439	-0.0030317	0.058753	0.044901	0.098504	0.5201	0.8926	0.12761
65.2958153	0.054412	0.38599	0.024719	0.039572	-0.028848	0.1557	0.026629	0.18262	0.043858	0.072272	0.18587	0.008489	0.059421	-0.0035919	0.46126	0.070586	-0.057647	-0.11269	-0.034784	0.23347	0.36415	0.20705	0.15029	0.13663	-0.0054895	0.63829	0.22887	0.16329	0.28369	0.14879	0.10985	0.04785	0.51983	0.37288	0.1435	-0.0010109	-0.06963	0.1722	0.15807	1.2153	0.0099143	0.089194	0.035742	0.052494	0.05221	0.10801	0.49788	0.87344	0.10815
65.36796537	0.040862	0.40508	-0.0077169	0.03668	-0.050204	0.15133	0.013851	0.15873	0.04673	0.055527	0.17868	-0.024272	0.056063	-0.024929	0.45606	0.065204	-0.038346	-0.12311	-0.021051	0.2502	0.43335	0.23397	0.16582	0.16955	0.0079872	0.54714	0.19666	0.15993	0.27088	0.15782	0.114	0.044647	0.54564	0.33902	0.1884	0.015769	-0.078152	0.13191	0.17953	1.1396	0.019518	0.13981	0.06572	0.067815	0.084757	0.093715	0.48995	0.83359	0.14608
65.44011544	0.040409	0.38308	-0.00075182	0.035136	-0.086879	0.14142	0.0032841	0.15944	0.050663	0.067782	0.14815	-0.040094	0.033134	-0.035349	0.46615	0.046202	-0.056341	-0.10253	0.0074197	0.28912	0.59174	0.26842	0.20289	0.18093	0.017287	0.50187	0.18873	0.16388	0.25061	0.21243	0.12567	0.026787	0.55454	0.29637	0.2004	0.027219	-0.076592	0.1178	0.17333	1.0683	0.033236	0.14959	0.057334	0.087422	0.11995	0.081817	0.44791	0.74918	0.26652
65.51226551	0.050121	0.3499	0.026146	0.051069	-0.12797	0.14033	-0.0034478	0.14736	0.030934	0.090419	0.14248	-0.062114	0.01911	-0.011802	0.41541	0.038183	-0.050478	-0.061318	0.045858	0.28795	0.7351	0.30635	0.21142	0.21834	-0.0028334	0.47991	0.19563	0.17095	0.24638	0.24506	0.12074	0.0012095	0.51327	0.26626	0.18444	0.037707	-0.080896	0.12145	0.14123	1.0237	0.017621	0.096976	0.025518	0.077567	0.16467	0.094227	0.41725	0.61304	0.36877
65.58441558	0.061503	0.31179	0.034515	0.040265	-0.12203	0.14707	0.011946	0.11375	-0.0074477	0.097483	0.15731	-0.089327	0.0064398	0.002281	0.34712	0.058914	0.012799	-0.039706	0.072348	0.26093	0.793	0.32336	0.17706	0.21815	-0.029209	0.4511	0.21522	0.14945	0.25625	0.25786	0.11662	0.0089779	0.44578	0.26309	0.17686	0.060978	-0.082307	0.12501	0.12031	0.98274	-0.009635	0.017212	-0.015872	0.057383	0.18005	0.087527	0.41927	0.48118	0.4253
65.65656566	0.059774	0.28981	0.030656	0.024957	-0.10104	0.10968	0.027298	0.10631	-0.030944	0.087423	0.1581	-0.083506	0.016621	-0.0044766	0.28983	0.083985	0.063122	-0.074833	0.054551	0.24244	0.79721	0.30856	0.18979	0.22929	-0.044391	0.44037	0.21786	0.12046	0.257	0.24183	0.12187	0.032344	0.3846	0.25757	0.16861	0.097043	-0.087185	0.11174	0.1521	0.89207	-0.034756	-0.017349	-0.057506	0.029792	0.16271	0.097613	0.41627	0.30476	0.50568
65.72871573	0.058668	0.29871	0.01216	0.042068	-0.086858	0.097123	0.032157	0.11563	-0.024462	0.060613	0.17072	-0.037102	0.031809	-0.0097012	0.25377	0.073774	0.055363	-0.087872	0.029597	0.18682	0.73051	0.2805	0.24638	0.25196	-0.03876	0.45773	0.21699	0.083335	0.2922	0.20942	0.094664	0.047167	0.32986	0.22047	0.13233	0.11797	-0.088094	0.10941	0.18992	0.84718	-0.057834	-0.018488	-0.084983	0.003629	0.18128	0.11494	0.3714	0.16641	0.57639
65.8008658	0.029641	0.29101	0.0035789	0.073166	-0.081246	0.10083	0.039911	0.12508	-0.016356	0.013131	0.17647	0.010779	0.030466	-0.023481	0.24193	0.037838	0.041949	-0.071074	0.016778	0.15565	0.67549	0.28433	0.28121	0.28316	-0.030715	0.4968	0.24219	0.055988	0.37753	0.19846	0.046021	0.049847	0.29046	0.18405	0.091351	0.11557	-0.081173	0.13737	0.2002	0.85835	-0.063961	0.0566	-0.095016	0.014784	0.19958	0.094912	0.32595	0.10626	0.60648
65.87301587	0.0036434	0.26388	0.032574	0.08884	-0.087655	0.076406	0.058334	0.14292	-0.015584	-0.038979	0.16358	0.034476	0.021955	-0.040299	0.24624	0.01905	0.053986	-0.049872	0.0012973	0.15866	0.67532	0.28342	0.29766	0.30234	-0.03844	0.53764	0.26463	0.078294	0.45679	0.21151	0.029728	0.054066	0.25994	0.15936	0.080489	0.092184	-0.081607	0.17303	0.21675	0.82366	-0.059597	0.17364	-0.063833	0.028772	0.15657	0.068316	0.32933	0.13906	0.61652
65.94516595	0.012932	0.24902	0.068321	0.072479	-0.10457	0.052449	0.091135	0.16145	-0.014502	-0.048556	0.13996	0.020297	0.050629	-0.035008	0.25888	0.051778	0.084076	-0.03308	0.027553	0.15767	0.67054	0.25931	0.30517	0.26682	-0.058792	0.65094	0.2614	0.095391	0.50016	0.2195	0.046581	0.047955	0.22954	0.14177	0.099791	0.076558	-0.073377	0.17374	0.2276	0.73415	-0.037521	0.23038	-0.042355	0.026201	0.07157	0.077207	0.31811	0.28808	0.61241
66.01731602	0.012383	0.24365	0.049819	0.045919	-0.10025	0.053371	0.13052	0.15309	0.0018962	-0.0096648	0.13337	-0.01488	0.089914	-0.036301	0.25368	0.10584	0.12237	-0.0072895	0.079062	0.19432	0.65252	0.2489	0.32479	0.24799	-0.085739	0.853	0.25425	0.10101	0.48564	0.21812	0.05747	0.032241	0.17595	0.1495	0.10375	0.063007	-0.059571	0.15329	0.22615	0.67608	-0.029398	0.24533	-0.0667	0.027332	0.040339	0.067174	0.31245	0.39509	0.59198
66.08946609	-0.00045743	0.24328	0.02406	0.055145	-0.067293	0.054478	0.17301	0.12356	0.014427	0.014866	0.16568	-0.014215	0.068021	-0.051734	0.2222	0.15382	0.16123	-0.0012585	0.12669	0.25103	0.70126	0.25842	0.35758	0.29295	-0.11196	1.0728	0.23641	0.1225	0.4285	0.25019	0.047151	0.032453	0.11135	0.19035	0.093466	0.040537	-0.038025	0.15308	0.24166	0.67516	-0.0023841	0.22284	-0.078519	0.032831	0.057162	0.054938	0.31244	0.4256	0.55568
66.16161616	-0.014251	0.25141	0.016405	0.060149	-0.062722	0.033838	0.16915	0.11865	0.012063	-0.0013226	0.2286	0.017205	0.033884	-0.033135	0.177	0.15126	0.20434	-0.011086	0.16664	0.24914	0.88478	0.27947	0.37543	0.31392	-0.10873	1.2148	0.20459	0.1468	0.38967	0.29759	0.058405	0.038674	0.10795	0.23464	0.076857	0.016352	-0.024356	0.16586	0.23416	0.69074	0.0083855	0.20404	-0.064063	0.036305	0.038614	0.081113	0.28505	0.45455	0.57133
66.23376623	0.024516	0.24238	0.0055	0.061902	-0.079465	0.02127	0.12731	0.11355	0.0082575	0.022036	0.29285	0.053403	0.044408	-0.0065131	0.1358	0.12892	0.25633	0.018636	0.16502	0.19319	1.0865	0.27928	0.36832	0.27336	-0.094487	1.2481	0.17597	0.14994	0.386	0.2987	0.13451	0.041222	0.13006	0.25363	0.058708	-0.0018388	-0.01818	0.15332	0.21889	0.66811	-0.0081925	0.18994	-0.07331	0.038151	-0.0051111	0.12934	0.24636	0.50274	0.61579
66.30591631	0.1184	0.22942	0.00046709	0.055393	-0.084854	0.042604	0.09067	0.093766	0.0058898	0.059489	0.33622	0.12257	0.072375	-0.013523	0.16013	0.14221	0.27574	0.053323	0.13056	0.16524	1.181	0.2673	0.32751	0.2481	-0.087693	1.1812	0.15971	0.12012	0.42998	0.27835	0.25623	0.055502	0.089528	0.24622	0.038119	0.011888	-0.0101	0.1052	0.21366	0.64619	-0.0059824	0.20049	-0.091732	0.054661	-0.048213	0.14887	0.23378	0.60727	0.58004
66.37806638	0.20947	0.23946	-0.0070138	0.018532	-0.089932	0.054596	0.093107	0.093634	0.0071021	0.039292	0.33999	0.19053	0.084243	-0.024715	0.19725	0.17096	0.27933	0.059701	0.089722	0.17461	1.209	0.25774	0.29758	0.24262	-0.065892	1.0068	0.1262	0.090908	0.47402	0.26523	0.38341	0.060471	0.031459	0.24013	0.015599	0.026535	-0.0064766	0.077324	0.19285	0.6558	-0.00075601	0.23101	-0.093456	0.072203	-0.053847	0.13921	0.21517	0.70341	0.53811
66.45021645	0.26019	0.25041	-0.017109	-0.013237	-0.069855	0.056126	0.12571	0.11009	-0.0065784	-0.013324	0.40393	0.20821	0.082817	-0.028263	0.20739	0.18852	0.29262	0.05437	0.096981	0.21931	1.1548	0.24777	0.26553	0.21854	-0.042194	0.90038	0.095938	0.086461	0.47145	0.26027	0.44208	0.050894	0.031507	0.31378	0.011413	0.044628	0.0058952	0.093415	0.17284	0.64398	-0.03824	0.22816	-0.11412	0.083207	-0.0079896	0.14042	0.18755	0.6968	0.64213
66.52236652	0.29289	0.25273	-0.013505	-0.028617	-0.048138	0.066985	0.14543	0.11836	-0.053404	-0.055457	0.50517	0.19006	0.078787	0.00095375	0.20847	0.18741	0.28751	0.056707	0.12344	0.24404	1.0934	0.22597	0.2025	0.18142	-0.044602	0.88462	0.082743	0.10794	0.44842	0.27829	0.44116	0.053945	0.052744	0.51575	0.0033772	0.078968	0.026805	0.087088	0.16355	0.57633	-0.06033	0.1991	-0.11082	0.1188	0.034121	0.16089	0.17234	0.62086	0.76495
[truncated: 77 more rows]
[truncated: 33 more columns]
