# Supplementary material for: Quantitative analysis of 1300-nm three-photon calcium imaging in the mouse brain
Source: eLife. 2020 Jan 30;9:e53205. doi: 10.7554/eLife.53205 (PMC7028383; doi:10.7554/eLife.53205)
Supplement: Figure 3—figure supplement 1—source data 1. [file elife-53205-fig3-figsupp1-data1.xlsx]

## Sheet: 1280nm
Immersion Water Thickness (um)	Power Transmission
390	0.959699
540	0.947244
640	0.935967
840	0.917564
1040	0.897435
1240	0.874062
1440	0.856329
1640	0.845857
1840	0.82767

## Sheet: 1310nm
Immersion Water Thickness (um)	Power Transmission
76	0.996456
276	0.944289
476	0.906257
676	0.875174
876	0.843655
1076	0.826863
1276	0.779271
1476	0.754081
1676	0.720776
1866	0.694541
2000	0.691669

## Sheet: 1340nm
Immersion Water Thickness (um)	Power Transmission
360	0.913353
510	0.870764
610	0.841565
810	0.806433
1010	0.755364
1210	0.731242
1410	0.689373
1610	0.641653
1810	0.616206

## Sheet: 1375nm
Immersion Water Thickness (um)	Power Transmission
250	0.881321
400	0.801558
500	0.752265
700	0.657028
900	0.593441
1100	0.531181
1300	0.483648
1500	0.44891
1700	0.406896
1900	0.321021

## Sheet: 1420nm
Immersion Water Thickness (um)	Power Transmission
250	0.880124
400	0.668856
500	0.558562
700	0.418532
900	0.320462
1100	0.256389
1300	0.209222
1500	0.177079
1700	0.148993
1900	0.131872

## Sheet: Spectra
1280nm		1310nm		1340nm		1375nm		1420nm
wavlength(nm)	Normalized Intensity	wavlength(nm)	Normalized Intensity	wavlength(nm)	Normalized Intensity	wavlength(nm)	Normalized Intensity	wavlength(nm)	Normalized Intensity
1200	0.04582	1200	0.037482	1200	0.0076813	1200	0.0045853	1200	0.0018164
1200.1	0.045828	1200.1	0.037404	1200.1	0.0076934	1200.1	0.0046479	1200.1	0.0017682
1200.2	0.045844	1200.2	0.037364	1200.2	0.0077033	1200.2	0.0047138	1200.2	0.0017416
1200.2	0.045837	1200.2	0.037334	1200.2	0.0077042	1200.2	0.0047665	1200.2	0.0017004
1200.3	0.04585	1200.3	0.037262	1200.3	0.0076921	1200.3	0.0047853	1200.3	0.0016608
1200.4	0.045844	1200.4	0.03722	1200.4	0.0076804	1200.4	0.0048332	1200.4	0.001615
1200.5	0.045843	1200.5	0.037199	1200.5	0.0076808	1200.4	0.004863	1200.5	0.0015536
1200.5	0.045881	1200.5	0.037145	1200.5	0.0076694	1200.5	0.0048834	1200.5	0.0015021
1200.6	0.045859	1200.6	0.037093	1200.6	0.0076548	1200.6	0.0048865	1200.6	0.0014681
1200.7	0.045872	1200.7	0.037082	1200.7	0.0076455	1200.7	0.0048915	1200.7	0.0014074
1200.7	0.045884	1200.7	0.037047	1200.7	0.0076225	1200.7	0.0048718	1200.7	0.0013562
1200.8	0.045841	1200.8	0.037001	1200.8	0.0076135	1200.8	0.0048565	1200.8	0.0013197
1200.9	0.045841	1200.9	0.036953	1200.9	0.0075917	1200.9	0.0048301	1200.9	0.0012902
1200.9	0.04581	1200.9	0.03694	1200.9	0.0075812	1200.9	0.0048	1200.9	0.0012421
1201	0.045762	1201	0.036913	1201	0.0075771	1201	0.004784	1201	0.0012076
1201.1	0.045732	1201.1	0.036857	1201.1	0.0075526	1201.1	0.0047472	1201.1	0.0011723
1201.2	0.045682	1201.2	0.036792	1201.2	0.0075345	1201.2	0.0047215	1201.2	0.0011521
1201.2	0.04561	1201.2	0.036746	1201.2	0.0075321	1201.2	0.0046734	1201.2	0.0011496
1201.3	0.045561	1201.3	0.036652	1201.3	0.0075099	1201.3	0.0046615	1201.3	0.0011255
1201.4	0.045471	1201.4	0.03658	1201.4	0.0075139	1201.4	0.0046382	1201.4	0.0010813
1201.4	0.045421	1201.4	0.036461	1201.4	0.0075117	1201.4	0.0046188	1201.4	0.0010459
1201.5	0.045339	1201.5	0.036353	1201.5	0.007518	1201.5	0.0046043	1201.5	0.0010147
1201.6	0.045312	1201.6	0.036251	1201.6	0.007512	1201.6	0.004596	1201.6	0.00098492
1201.7	0.045222	1201.7	0.036102	1201.7	0.0075037	1201.7	0.0045841	1201.7	0.00096282
1201.7	0.045142	1201.7	0.035983	1201.7	0.0075062	1201.7	0.0045931	1201.7	0.00091661
1201.8	0.045081	1201.8	0.035874	1201.8	0.0075159	1201.8	0.0045939	1201.8	0.00087779
1201.9	0.045035	1201.9	0.035735	1201.9	0.0075119	1201.9	0.0045999	1201.9	0.00085016
1201.9	0.044997	1201.9	0.035562	1201.9	0.0075306	1201.9	0.0046004	1201.9	0.00082732
1202	0.044947	1202	0.035432	1202	0.0075443	1202	0.0046193	1202	0.00077189
1202.1	0.044916	1202.1	0.035262	1202.1	0.0075523	1202.1	0.0046427	1202.1	0.00072017
1202.2	0.044891	1202.1	0.035109	1202.2	0.0075592	1202.1	0.0046397	1202.2	0.00069939
1202.2	0.044873	1202.2	0.035017	1202.2	0.0075798	1202.2	0.0046608	1202.2	0.00064746
1202.3	0.044885	1202.3	0.034887	1202.3	0.007592	1202.3	0.0046704	1202.3	0.00059338
1202.4	0.044887	1202.4	0.034803	1202.4	0.0075955	1202.4	0.004681	1202.4	0.00055256
1202.4	0.044941	1202.4	0.034752	1202.4	0.0076075	1202.4	0.0046882	1202.4	0.00050446
1202.5	0.044978	1202.5	0.034704	1202.5	0.0076002	1202.5	0.0046935	1202.5	0.00045637
1202.6	0.045051	1202.6	0.034661	1202.6	0.0076077	1202.6	0.0046974	1202.6	0.00040564
1202.6	0.045134	1202.6	0.034635	1202.6	0.0076105	1202.6	0.0046984	1202.6	0.00035535
1202.7	0.045218	1202.7	0.034665	1202.7	0.0076213	1202.7	0.0046997	1202.7	0.00032392
1202.8	0.045329	1202.8	0.034694	1202.8	0.0076302	1202.8	0.0047122	1202.8	0.00029011
1202.9	0.045469	1202.9	0.034776	1202.9	0.0076181	1202.9	0.004699	1202.9	0.00024855
1202.9	0.045592	1202.9	0.034867	1202.9	0.0076195	1202.9	0.0047064	1202.9	0.00020001
1203	0.045713	1203	0.034967	1203	0.0076113	1203	0.0046992	1203	0.00016982
1203.1	0.045876	1203.1	0.035109	1203.1	0.007612	1203.1	0.0046879	1203.1	0.0001516
1203.1	0.046003	1203.1	0.035276	1203.1	0.0076049	1203.1	0.0046964	1203.1	0.00012311
1203.2	0.046174	1203.2	0.035428	1203.2	0.0075987	1203.2	0.0046869	1203.2	9.8649e-05
1203.3	0.046318	1203.3	0.03561	1203.3	0.0075882	1203.3	0.0046821	1203.3	7.1493e-05
1203.4	0.046489	1203.4	0.035767	1203.4	0.007578	1203.4	0.0046877	1203.4	5.8517e-05
1203.4	0.04668	1203.4	0.035956	1203.4	0.0075748	1203.4	0.0046696	1203.4	3.7592e-05
1203.5	0.046836	1203.5	0.036111	1203.5	0.0075574	1203.5	0.0046826	1203.5	3.981e-05
1203.6	0.047008	1203.6	0.036309	1203.6	0.0075416	1203.6	0.0046784	1203.6	5.1756e-05
1203.6	0.047174	1203.6	0.036475	1203.6	0.007532	1203.6	0.0046402	1203.6	5.9083e-05
1203.7	0.047344	1203.7	0.036607	1203.7	0.0075243	1203.7	0.0046295	1203.7	6.4332e-05
1203.8	0.047497	1203.8	0.03677	1203.8	0.0075148	1203.8	0.0046308	1203.8	9.1273e-05
1203.9	0.047682	1203.9	0.036894	1203.9	0.0075126	1203.8	0.0045976	1203.9	0.00011011
1203.9	0.047869	1203.9	0.037006	1203.9	0.0074877	1203.9	0.0045645	1203.9	0.00012785
1204	0.048002	1204	0.037114	1204	0.0074645	1204	0.0045057	1204	0.00014383
1204.1	0.048218	1204.1	0.037218	1204.1	0.0074516	1204.1	0.0044597	1204.1	0.00015101
1204.1	0.048382	1204.1	0.037268	1204.1	0.0074358	1204.1	0.0043961	1204.1	0.00019238
1204.2	0.048548	1204.2	0.037343	1204.2	0.0074357	1204.2	0.0043466	1204.2	0.00023606
1204.3	0.048684	1204.3	0.037387	1204.3	0.0074269	1204.3	0.0042633	1204.3	0.00027504
1204.4	0.048819	1204.3	0.037432	1204.4	0.0074331	1204.3	0.0041827	1204.3	0.00031061
1204.4	0.049	1204.4	0.037453	1204.4	0.0074249	1204.4	0.0041011	1204.4	0.00036204
1204.5	0.049163	1204.5	0.037458	1204.5	0.0074023	1204.5	0.0040051	1204.5	0.00041472
1204.6	0.049312	1204.6	0.037446	1204.6	0.0074031	1204.6	0.0038888	1204.6	0.00046911
1204.6	0.049474	1204.6	0.037429	1204.6	0.0073987	1204.6	0.0037902	1204.6	0.00051874
1204.7	0.049626	1204.7	0.037426	1204.7	0.0073829	1204.7	0.0036901	1204.7	0.00055633
1204.8	0.049809	1204.8	0.037419	1204.8	0.0073911	1204.8	0.0035786	1204.8	0.00061221
1204.8	0.049954	1204.8	0.037407	1204.8	0.0074019	1204.8	0.003482	1204.8	0.00068634
1204.9	0.050113	1204.9	0.037348	1204.9	0.0074039	1204.9	0.0033657	1204.9	0.00075132
1205	0.050283	1205	0.037346	1205	0.0073965	1205	0.0032581	1205	0.00081382
1205.1	0.050423	1205.1	0.037313	1205.1	0.0074208	1205.1	0.0031649	1205.1	0.00085973
1205.1	0.050572	1205.1	0.037301	1205.1	0.0074343	1205.1	0.0030846	1205.1	0.0009141
1205.2	0.050734	1205.2	0.037273	1205.2	0.0074489	1205.2	0.0029979	1205.2	0.00097807
1205.3	0.05085	1205.3	0.037214	1205.3	0.0074461	1205.3	0.0029353	1205.3	0.0010416
1205.3	0.050984	1205.3	0.03717	1205.3	0.0074644	1205.3	0.0028924	1205.3	0.0010913
1205.4	0.051098	1205.4	0.037165	1205.4	0.0074672	1205.4	0.0028538	1205.4	0.0011312
1205.5	0.051213	1205.5	0.037121	1205.5	0.0074712	1205.5	0.0028276	1205.5	0.0011776
1205.6	0.051282	1205.6	0.037127	1205.6	0.0074887	1205.6	0.0028099	1205.6	0.0012027
1205.6	0.051367	1205.6	0.03712	1205.6	0.0075056	1205.6	0.0028181	1205.6	0.0012353
1205.7	0.051448	1205.7	0.03707	1205.7	0.0075018	1205.7	0.0028122	1205.7	0.0012657
1205.8	0.051514	1205.8	0.037102	1205.8	0.0075073	1205.8	0.0028428	1205.8	0.0012835
1205.8	0.051565	1205.8	0.0371	1205.8	0.0075268	1205.8	0.0028786	1205.8	0.001291
1205.9	0.051604	1205.9	0.037076	1205.9	0.0075281	1205.9	0.0029238	1205.9	0.0012835
1206	0.05166	1206	0.037076	1206	0.0075314	1206	0.0029779	1206	0.0012829
1206.1	0.051659	1206.1	0.037091	1206.1	0.0075226	1206.1	0.003062	1206.1	0.0012913
1206.1	0.051695	1206.1	0.037082	1206.1	0.0075185	1206.1	0.0031498	1206.1	0.0012866
1206.2	0.051719	1206.2	0.037074	1206.2	0.0075105	1206.2	0.0032477	1206.2	0.0012601
1206.3	0.051727	1206.3	0.037094	1206.3	0.0074956	1206.3	0.0033286	1206.3	0.0012381
1206.3	0.051769	1206.3	0.037104	1206.3	0.0074838	1206.3	0.0034309	1206.3	0.0012132
1206.4	0.051812	1206.4	0.037099	1206.4	0.0074748	1206.4	0.0035315	1206.4	0.0012159
1206.5	0.051833	1206.5	0.037115	1206.5	0.0074618	1206.5	0.0036469	1206.5	0.0011945
1206.6	0.051852	1206.6	0.037092	1206.6	0.007439	1206.6	0.003769	1206.6	0.0011827
1206.6	0.051914	1206.6	0.037044	1206.6	0.0074114	1206.6	0.0038717	1206.6	0.0011763
1206.7	0.051987	1206.7	0.037037	1206.7	0.0073913	1206.7	0.0039835	1206.7	0.0011948
1206.8	0.0521	1206.8	0.037031	1206.8	0.0073667	1206.8	0.0040891	1206.8	0.0012024
1206.8	0.052183	1206.8	0.036975	1206.8	0.0073541	1206.8	0.0041953	1206.8	0.0012225
1206.9	0.052252	1206.9	0.036916	1206.9	0.0073106	1206.9	0.0042976	1206.9	0.0012311
1207	0.052396	1207	0.036854	1207	0.0072901	1207	0.004383	1207	0.0012592
1207.1	0.052539	1207.1	0.036827	1207.1	0.0072664	1207.1	0.0044619	1207.1	0.0012871
1207.1	0.052686	1207.1	0.036746	1207.1	0.0072416	1207.1	0.0045585	1207.1	0.0013138
1207.2	0.052847	1207.2	0.036696	1207.2	0.0072185	1207.2	0.0046223	1207.2	0.0013548
1207.3	0.05304	1207.3	0.036629	1207.3	0.0071918	1207.3	0.004678	1207.3	0.0013875
1207.3	0.053196	1207.3	0.036556	1207.3	0.0071594	1207.3	0.0047158	1207.3	0.0014135
1207.4	0.053361	1207.4	0.03645	1207.4	0.0071475	1207.4	0.0047639	1207.4	0.0014594
1207.5	0.053589	1207.5	0.036372	1207.5	0.0071313	1207.5	0.0048137	1207.5	0.0015098
1207.6	0.053752	1207.6	0.036307	1207.6	0.0071099	1207.6	0.004814	1207.6	0.0015421
1207.6	0.053928	1207.6	0.036204	1207.6	0.0070975	1207.6	0.0048032	1207.6	0.0015645
1207.7	0.054132	1207.7	0.036095	1207.7	0.0070708	1207.7	0.0047798	1207.7	0.0015767
1207.8	0.054334	1207.8	0.036009	1207.8	0.0070512	1207.8	0.0047531	1207.8	0.0015777
1207.8	0.054511	1207.8	0.035906	1207.8	0.0070341	1207.8	0.0047006	1207.8	0.0015852
1207.9	0.054658	1207.9	0.035827	1207.9	0.0070184	1207.9	0.0046341	1207.9	0.0015712
1208	0.054805	1208	0.035746	1208	0.0070065	1208	0.0045453	1208	0.0015368
1208.1	0.054958	1208.1	0.035678	1208.1	0.0069958	1208.1	0.0044923	1208.1	0.0014941
1208.1	0.05511	1208.1	0.035639	1208.1	0.0069965	1208.1	0.0043943	1208.1	0.0014474
1208.2	0.055271	1208.2	0.035553	1208.2	0.0069866	1208.2	0.0042965	1208.2	0.0013844
1208.3	0.055381	1208.3	0.035503	1208.3	0.006983	1208.3	0.0041992	1208.3	0.0013201
1208.3	0.055526	1208.3	0.035489	1208.3	0.0069698	1208.3	0.0040756	1208.3	0.0012299
1208.4	0.055671	1208.4	0.035483	1208.4	0.0069728	1208.4	0.0039845	1208.4	0.0011395
1208.5	0.055775	1208.5	0.035426	1208.5	0.006976	1208.5	0.0038831	1208.5	0.0010667
1208.6	0.055881	1208.6	0.035407	1208.6	0.0069606	1208.6	0.0037776	1208.6	0.00099085
1208.6	0.056015	1208.6	0.035416	1208.6	0.0069547	1208.6	0.0036697	1208.6	0.00091065
1208.7	0.056124	1208.7	0.035395	1208.7	0.0069476	1208.7	0.0035793	1208.7	0.00084544
1208.8	0.056273	1208.8	0.035419	1208.8	0.0069424	1208.8	0.0035089	1208.8	0.00078598
1208.8	0.05636	1208.8	0.035461	1208.8	0.0069375	1208.8	0.0034209	1208.8	0.00073647
1208.9	0.056493	1208.9	0.035473	1208.9	0.0069443	1208.9	0.0033777	1208.9	0.00067891
1209	0.056626	1209	0.035502	1209	0.0069473	1209	0.0033292	1209	0.00064215
1209.1	0.056747	1209.1	0.035546	1209.1	0.0069472	1209.1	0.0032635	1209.1	0.00061805
1209.1	0.056887	1209.1	0.035596	1209.1	0.0069501	1209.1	0.0032342	1209.1	0.00059701
1209.2	0.057004	1209.2	0.035654	1209.2	0.0069579	1209.2	0.0032353	1209.2	0.00059439
1209.3	0.057127	1209.3	0.035686	1209.3	0.0069821	1209.3	0.0032317	1209.3	0.00059957
1209.3	0.057265	1209.3	0.035732	1209.3	0.0069861	1209.3	0.0032408	1209.3	0.00062734
1209.4	0.057364	1209.4	0.035776	1209.4	0.0069933	1209.4	0.0032781	1209.4	0.00065637
1209.5	0.057494	1209.5	0.035796	1209.5	0.0070142	1209.5	0.0033195	1209.5	0.00069561
1209.6	0.057678	1209.6	0.035818	1209.6	0.0070427	1209.6	0.0033728	1209.6	0.00072457
1209.6	0.057805	1209.6	0.035865	1209.6	0.0070772	1209.6	0.003429	1209.6	0.00078088
1209.7	0.057977	1209.7	0.03588	1209.7	0.0071275	1209.7	0.0034843	1209.7	0.0008322
1209.8	0.058145	1209.8	0.035912	1209.8	0.0071638	1209.8	0.0035594	1209.8	0.00089193
1209.8	0.058308	1209.8	0.03591	1209.8	0.0072094	1209.8	0.0036291	1209.8	0.00095562
1209.9	0.058453	1209.9	0.03592	1209.9	0.0072512	1209.9	0.0036834	1209.9	0.00099679
1210	0.058665	1210	0.035901	1210	0.0073074	1210	0.0037634	1210	0.0010585
1210.1	0.058843	1210.1	0.035898	1210.1	0.007362	1210.1	0.0038325	1210.1	0.0011003
1210.1	0.059004	1210.1	0.035889	1210.1	0.00744	1210.1	0.0039027	1210.1	0.0011532
1210.2	0.059237	1210.2	0.035824	1210.2	0.0075098	1210.2	0.0039643	1210.2	0.0011719
1210.3	0.059428	1210.3	0.035753	1210.3	0.00757	1210.3	0.0040382	1210.3	0.001205
1210.3	0.059613	1210.3	0.035706	1210.3	0.0076202	1210.3	0.0040896	1210.3	0.0012307
1210.4	0.059861	1210.4	0.035661	1210.4	0.0076905	1210.4	0.0041389	1210.4	0.0012464
1210.5	0.060053	1210.5	0.035594	1210.5	0.0077495	1210.5	0.0041948	1210.5	0.0012425
1210.6	0.060278	1210.6	0.035456	1210.6	0.0078126	1210.6	0.0042305	1210.6	0.0012345
1210.6	0.060464	1210.6	0.035372	1210.6	0.0078599	1210.6	0.0042444	1210.6	0.0012345
1210.7	0.060697	1210.7	0.03527	1210.7	0.0078828	1210.7	0.0042674	1210.7	0.0012202
1210.8	0.060862	1210.8	0.035164	1210.8	0.0079234	1210.8	0.0042817	1210.8	0.0011855
1210.9	0.061085	1210.8	0.035103	1210.9	0.0079498	1210.8	0.0043021	1210.9	0.0011795
1210.9	0.061281	1210.9	0.035025	1210.9	0.0079591	1210.9	0.0042868	1210.9	0.0011503
1211	0.061442	1211	0.034917	1211	0.0079687	1211	0.0042618	1211	0.0011154
1211.1	0.061633	1211.1	0.034812	1211.1	0.0079667	1211.1	0.0042481	1211.1	0.0010991
1211.1	0.06184	1211.1	0.034704	1211.1	0.0079433	1211.1	0.0042288	1211.1	0.0010501
1211.2	0.062005	1211.2	0.034597	1211.2	0.0079163	1211.2	0.0041943	1211.2	0.001028
1211.3	0.062119	1211.3	0.034515	1211.3	0.0078846	1211.3	0.0041417	1211.3	0.0010036
1211.4	0.062257	1211.4	0.034445	1211.4	0.0078439	1211.3	0.0041092	1211.4	0.00095142
1211.4	0.062392	1211.4	0.034364	1211.4	0.0077867	1211.4	0.0040507	1211.4	0.00092352
1211.5	0.062537	1211.5	0.034307	1211.5	0.0077375	1211.5	0.0040081	1211.5	0.00088335
1211.6	0.062678	1211.6	0.03425	1211.6	0.007666	1211.6	0.0039325	1211.6	0.00086091
1211.6	0.062753	1211.6	0.034168	1211.6	0.0075925	1211.6	0.0038574	1211.6	0.00084846
1211.7	0.062857	1211.7	0.034134	1211.7	0.0075428	1211.7	0.0037859	1211.7	0.00082989
1211.8	0.063015	1211.8	0.034074	1211.8	0.0074762	1211.8	0.0037078	1211.8	0.00080879
1211.9	0.063091	1211.9	0.034033	1211.9	0.0074204	1211.9	0.0036332	1211.9	0.00081073
1211.9	0.063172	1211.9	0.033999	1211.9	0.0073555	1211.9	0.0035577	1211.9	0.00083968
1212	0.063332	1212	0.033996	1212	0.0073031	1212	0.003487	1212	0.00083053
1212.1	0.06346	1212.1	0.033955	1212.1	0.0072503	1212.1	0.0034259	1212.1	0.00084952
1212.1	0.063577	1212.1	0.033907	1212.1	0.0072037	1212.1	0.0033631	1212.1	0.00087012
1212.2	0.063718	1212.2	0.033963	1212.2	0.0071677	1212.2	0.0033009	1212.2	0.00089227
1212.3	0.063837	1212.3	0.033951	1212.3	0.0071521	1212.3	0.0032419	1212.3	0.00090943
1212.4	0.063973	1212.4	0.033981	1212.4	0.0071309	1212.4	0.0031987	1212.4	0.00094035
1212.4	0.064117	1212.4	0.034002	1212.4	0.0071138	1212.4	0.0031501	1212.4	0.00097057
1212.5	0.064269	1212.5	0.034031	1212.5	0.0070915	1212.5	0.0031327	1212.5	0.001005
1212.6	0.064467	1212.6	0.034047	1212.6	0.0071057	1212.6	0.0031274	1212.6	0.0010463
1212.7	0.064655	1212.6	0.034089	1212.7	0.0071007	1212.6	0.0031015	1212.6	0.001066
1212.7	0.064846	1212.7	0.034124	1212.7	0.0071006	1212.7	0.0030888	1212.7	0.0010915
1212.8	0.065008	1212.8	0.034174	1212.8	0.0070898	1212.8	0.0030952	1212.8	0.0011314
1212.9	0.065146	1212.9	0.034209	1212.9	0.0071031	1212.9	0.0031224	1212.9	0.0011471
1212.9	0.065345	1212.9	0.034291	1212.9	0.0071217	1212.9	0.00313	1212.9	0.001161
1213	0.065526	1213	0.034378	1213	0.0071364	1213	0.0031605	1213	0.0011797
1213.1	0.065622	1213.1	0.034441	1213.1	0.0071451	1213.1	0.0031953	1213.1	0.0012043
1213.2	0.065782	1213.2	0.034513	1213.2	0.007147	1213.1	0.0032241	1213.2	0.001191
1213.2	0.065942	1213.2	0.03461	1213.2	0.0071426	1213.2	0.0032546	1213.2	0.0011849
1213.3	0.066067	1213.3	0.034651	1213.3	0.0071514	1213.3	0.003293	1213.3	0.001164
1213.4	0.066153	1213.4	0.034728	1213.4	0.0071573	1213.4	0.0033207	1213.4	0.001136
1213.4	0.066255	1213.4	0.034808	1213.4	0.0071633	1213.4	0.003361	1213.4	0.0011217
1213.5	0.06632	1213.5	0.034874	1213.5	0.007154	1213.5	0.0033806	1213.5	0.001092
1213.6	0.066399	1213.6	0.034967	1213.6	0.0071666	1213.6	0.0033881	1213.6	0.0010623
1213.7	0.066507	1213.7	0.035035	1213.7	0.007152	1213.7	0.003407	1213.7	0.0010131
1213.7	0.066472	1213.7	0.035093	1213.7	0.0071471	1213.7	0.0034051	1213.7	0.00097209
1213.8	0.066515	1213.8	0.035157	1213.8	0.0071572	1213.8	0.0034007	1213.8	0.00092122
1213.9	0.06655	1213.9	0.035247	1213.9	0.0071671	1213.9	0.0034059	1213.9	0.00086806
1213.9	0.066542	1213.9	0.035283	1213.9	0.0071716	1213.9	0.0033866	1213.9	0.00081331
1214	0.066555	1214	0.035336	1214	0.0071744	1214	0.0033404	1214	0.00078336
1214.1	0.066545	1214.1	0.035394	1214.1	0.007174	1214.1	0.0033405	1214.1	0.0007391
1214.2	0.066604	1214.2	0.035445	1214.2	0.0071908	1214.2	0.0033082	1214.2	0.00068515
1214.2	0.06658	1214.2	0.035484	1214.2	0.0072117	1214.2	0.0032674	1214.2	0.00063879
1214.3	0.066632	1214.3	0.03551	1214.3	0.0072165	1214.3	0.0032113	1214.3	0.00061303
1214.4	0.066652	1214.4	0.03549	1214.4	0.0072509	1214.4	0.0031645	1214.4	0.00054287
1214.5	0.066693	1214.5	0.035468	1214.5	0.0072713	1214.4	0.0031325	1214.5	0.00050796
1214.5	0.066774	1214.5	0.035475	1214.5	0.0072893	1214.5	0.0030996	1214.5	0.00048
1214.6	0.066863	1214.6	0.03548	1214.6	0.0073141	1214.6	0.0030503	1214.6	0.00044412
1214.7	0.066931	1214.7	0.035511	1214.7	0.0073511	1214.7	0.0030173	1214.7	0.00044287
1214.7	0.067027	1214.7	0.035508	1214.7	0.0073907	1214.7	0.0029804	1214.7	0.00041663
1214.8	0.067243	1214.8	0.035503	1214.8	0.0074148	1214.8	0.0029562	1214.8	0.00039367
1214.9	0.067434	1214.9	0.035481	1214.9	0.0074327	1214.9	0.0029221	1214.9	0.00039745
1215	0.067626	1215	0.035472	1215	0.0074644	1215	0.0029204	1215	0.00038518
1215	0.067856	1215	0.035445	1215	0.0074871	1215	0.0028931	1215	0.00039704
1215.1	0.068094	1215.1	0.035436	1215.1	0.0075143	1215.1	0.0028766	1215.1	0.00041809
1215.2	0.068408	1215.2	0.035444	1215.2	0.0075429	1215.2	0.0028845	1215.2	0.00042711
1215.2	0.068716	1215.2	0.035457	1215.2	0.0075472	1215.2	0.0028966	1215.2	0.00045734
1215.3	0.069001	1215.3	0.03548	1215.3	0.0075702	1215.3	0.0029134	1215.3	0.00049202
1215.4	0.069357	1215.4	0.035488	1215.4	0.0075863	1215.4	0.0029296	1215.4	0.00053383
1215.5	0.069758	1215.5	0.035484	1215.5	0.0075968	1215.5	0.00293	1215.5	0.00055922
1215.5	0.07013	1215.5	0.035493	1215.5	0.0075938	1215.5	0.0029584	1215.5	0.00062902
1215.6	0.070493	1215.6	0.035523	1215.6	0.0076083	1215.6	0.0029655	1215.6	0.00068935
1215.7	0.070862	1215.7	0.035549	1215.7	0.0076138	1215.7	0.0030002	1215.7	0.00076259
1215.8	0.071235	1215.8	0.035565	1215.8	0.007626	1215.8	0.0030384	1215.8	0.00084135
1215.8	0.071626	1215.8	0.035592	1215.8	0.0076139	1215.8	0.0030587	1215.8	0.00092039
1215.9	0.072035	1215.9	0.035598	1215.9	0.0076098	1215.9	0.0030883	1215.9	0.0009974
1216	0.072394	1216	0.035631	1216	0.0076035	1216	0.0031185	1216	0.0010955
1216	0.072734	1216	0.035643	1216	0.0076158	1216	0.003132	1216	0.0011981
1216.1	0.073048	1216.1	0.035676	1216.1	0.0076035	1216.1	0.0031675	1216.1	0.0012905
1216.2	0.073353	1216.2	0.035672	1216.2	0.007595	1216.2	0.0032272	1216.2	0.001385
1216.3	0.073622	1216.3	0.035671	1216.3	0.007606	1216.3	0.0032843	1216.3	0.0014779
1216.3	0.073882	1216.3	0.03564	1216.3	0.0076049	1216.3	0.003324	1216.3	0.0015694
1216.4	0.074162	1216.4	0.035615	1216.4	0.0075893	1216.4	0.0033652	1216.4	0.0016457
1216.5	0.074387	1216.5	0.03556	1216.5	0.0075911	1216.5	0.0034045	1216.5	0.0017243
1216.6	0.074592	1216.5	0.035501	1216.6	0.007588	1216.5	0.0034665	1216.6	0.0017966
1216.6	0.074763	1216.6	0.035474	1216.6	0.0075851	1216.6	0.0035114	1216.6	0.0018434
1216.7	0.074908	1216.7	0.035444	1216.7	0.0075822	1216.7	0.0035583	1216.7	0.0019102
1216.8	0.074999	1216.8	0.03538	1216.8	0.0075801	1216.8	0.003599	1216.8	0.0019726
1216.8	0.075105	1216.8	0.035328	1216.8	0.0075778	1216.8	0.0036437	1216.8	0.0020136
1216.9	0.07521	1216.9	0.035239	1216.9	0.0075735	1216.9	0.0036996	1216.9	0.0020579
1217	0.075289	1217	0.035181	1217	0.0075598	1217	0.0037567	1217	0.0020918
1217.1	0.075338	1217.1	0.035105	1217.1	0.0075597	1217.1	0.0038054	1217.1	0.0020931
1217.1	0.075409	1217.1	0.035022	1217.1	0.0075399	1217.1	0.0038454	1217.1	0.0020906
1217.2	0.07544	1217.2	0.034943	1217.2	0.0075328	1217.2	0.0038729	1217.2	0.0020936
1217.3	0.075489	1217.3	0.0349	1217.3	0.0075209	1217.3	0.0039027	1217.3	0.0020816
1217.4	0.075498	1217.3	0.034852	1217.4	0.0074974	1217.3	0.003922	1217.3	0.0020569
1217.4	0.075595	1217.4	0.03477	1217.4	0.0074742	1217.4	0.0039214	1217.4	0.0020295
1217.5	0.075657	1217.5	0.034777	1217.5	0.007461	1217.5	0.0039309	1217.5	0.0020009
1217.6	0.075711	1217.6	0.034708	1217.6	0.0074381	1217.6	0.0039389	1217.6	0.001945
1217.6	0.075788	1217.6	0.034691	1217.6	0.0074315	1217.6	0.003904	1217.6	0.0019001
1217.7	0.075879	1217.7	0.034654	1217.7	0.0074093	1217.7	0.0038931	1217.7	0.0018434
1217.8	0.076026	1217.8	0.034648	1217.8	0.0074036	1217.8	0.0038512	1217.8	0.00179
1217.9	0.076147	1217.9	0.03467	1217.9	0.007387	1217.9	0.0038282	1217.9	0.0017266
1217.9	0.076315	1217.9	0.034668	1217.9	0.0073666	1217.9	0.0037746	1217.9	0.0016786
1218	0.076468	1218	0.034725	1218	0.0073644	1218	0.0037225	1218	0.0016244
1218.1	0.076675	1218.1	0.034747	1218.1	0.0073765	1218.1	0.0036472	1218.1	0.0015557
1218.2	0.076908	1218.1	0.034762	1218.2	0.0073701	1218.1	0.003591	1218.1	0.0014959
1218.2	0.077132	1218.2	0.034778	1218.2	0.0073659	1218.2	0.0035165	1218.2	0.0014171
1218.3	0.077396	1218.3	0.034812	1218.3	0.0073591	1218.3	0.003452	1218.3	0.0013576
1218.4	0.077648	1218.4	0.034849	1218.4	0.0073636	1218.4	0.0033963	1218.4	0.0012942
1218.4	0.077878	1218.4	0.034923	1218.4	0.0073863	1218.4	0.0033388	1218.4	0.0012388
1218.5	0.078208	1218.5	0.034978	1218.5	0.007405	1218.5	0.0032671	1218.5	0.0012027
1218.6	0.078492	1218.6	0.035029	1218.6	0.0074232	1218.6	0.003225	1218.6	0.0011515
1218.7	0.0788	1218.7	0.035093	1218.7	0.0074536	1218.7	0.0031657	1218.7	0.0010985
1218.7	0.079121	1218.7	0.035157	1218.7	0.0074831	1218.7	0.0031197	1218.7	0.0010668
1218.8	0.079409	1218.8	0.035213	1218.8	0.007524	1218.8	0.0030832	1218.8	0.0010317
1218.9	0.079717	1218.9	0.035248	1218.9	0.0075601	1218.9	0.0030472	1218.9	0.0010148
1219	0.080052	1218.9	0.035268	1219	0.0075857	1218.9	0.0030219	1218.9	0.00099612
1219	0.08033	1219	0.035306	1219	0.0076396	1219	0.0030309	1219	0.00099963
1219.1	0.080624	1219.1	0.035317	1219.1	0.007684	1219.1	0.0030189	1219.1	0.00099508
1219.2	0.080974	1219.2	0.035332	1219.2	0.0077138	1219.2	0.0030361	1219.2	0.00099504
1219.2	0.081317	1219.2	0.035341	1219.2	0.0077526	1219.2	0.0030351	1219.2	0.0010042
1219.3	0.08158	1219.3	0.035302	1219.3	0.0077821	1219.3	0.003043	1219.3	0.0010003
1219.4	0.081868	1219.4	0.03526	1219.4	0.0078261	1219.4	0.0030736	1219.4	0.0010144
1219.5	0.082225	1219.5	0.035241	1219.5	0.007855	1219.5	0.0031127	1219.5	0.0010202
1219.5	0.082512	1219.5	0.035187	1219.5	0.0078826	1219.5	0.003149	1219.5	0.0010263
1219.6	0.082834	1219.6	0.035111	1219.6	0.0078972	1219.6	0.0032003	1219.6	0.0010337
1219.7	0.083146	1219.7	0.03501	1219.7	0.0079215	1219.7	0.0032405	1219.7	0.00104
1219.8	0.083467	1219.7	0.034928	1219.8	0.0079482	1219.7	0.0032695	1219.8	0.0010458
1219.8	0.083792	1219.8	0.034861	1219.8	0.0079521	1219.8	0.0032927	1219.8	0.001055
1219.9	0.084145	1219.9	0.034768	1219.9	0.0079655	1219.9	0.0033547	1219.9	0.0010312
1220	0.084482	1220	0.034698	1220	0.0079819	1220	0.0033861	1220	0.0010383
1220	0.084817	1220	0.034642	1220	0.0079863	1220	0.003425	1220	0.0010473
1220.1	0.085162	1220.1	0.034584	1220.1	0.0079729	1220.1	0.0034413	1220.1	0.0010307
1220.2	0.085547	1220.2	0.034537	1220.2	0.0079595	1220.2	0.0034505	1220.2	0.001035
1220.3	0.085886	1220.3	0.034485	1220.3	0.0079492	1220.3	0.0034781	1220.3	0.0010162
1220.3	0.086263	1220.3	0.034442	1220.3	0.0079208	1220.3	0.0034735	1220.3	0.0010072
1220.4	0.086591	1220.4	0.034382	1220.4	0.0078844	1220.4	0.0034651	1220.4	0.0010144
1220.5	0.086937	1220.5	0.034393	1220.5	0.0078477	1220.5	0.0034441	1220.5	0.00097759
1220.6	0.087308	1220.6	0.034356	1220.6	0.0078039	1220.5	0.00343	1220.6	0.00095616
1220.6	0.087642	1220.6	0.034412	1220.6	0.0077701	1220.6	0.0033902	1220.6	0.00095813
1220.7	0.087959	1220.7	0.034443	1220.7	0.0077107	1220.7	0.0033619	1220.7	0.0009412
1220.8	0.088255	1220.8	0.0345	1220.8	0.0076496	1220.8	0.0033101	1220.8	0.00092397
1220.8	0.088619	1220.8	0.03457	1220.8	0.0075899	1220.8	0.00327	1220.8	0.00091742
1220.9	0.088943	1220.9	0.034616	1220.9	0.0075213	1220.9	0.0031951	1220.9	0.00090942
1221	0.089195	1221	0.034669	1221	0.0074583	1221	0.003131	1221	0.00090823
1221.1	0.08948	1221.1	0.034684	1221.1	0.0073899	1221.1	0.0030483	1221.1	0.00091615
1221.1	0.089784	1221.1	0.034769	1221.1	0.007315	1221.1	0.002981	1221.1	0.00092184
1221.2	0.090038	1221.2	0.034832	1221.2	0.0072409	1221.2	0.0029104	1221.2	0.0009176
1221.3	0.090248	1221.3	0.034893	1221.3	0.0071652	1221.3	0.0028374	1221.3	0.00093242
1221.4	0.09049	1221.4	0.034908	1221.4	0.00709	1221.4	0.0027663	1221.4	0.00093209
1221.4	0.090718	1221.4	0.034887	1221.4	0.0070406	1221.4	0.0026938	1221.4	0.00094119
1221.5	0.09092	1221.5	0.034875	1221.5	0.0069626	1221.5	0.0026181	1221.5	0.0009569
1221.6	0.091197	1221.6	0.034849	1221.6	0.0069023	1221.6	0.0025402	1221.6	0.00096271
1221.6	0.091366	1221.6	0.034783	1221.6	0.0068167	1221.6	0.0024684	1221.6	0.00098466
1221.7	0.091525	1221.7	0.034716	1221.7	0.0067552	1221.7	0.0023994	1221.7	0.00098704
1221.8	0.091733	1221.8	0.034613	1221.8	0.0066884	1221.8	0.0023465	1221.8	0.0010009
1221.9	0.091879	1221.9	0.034528	1221.9	0.0066363	1221.9	0.0022842	1221.9	0.0010068
1221.9	0.092017	1221.9	0.034431	1221.9	0.0066001	1221.9	0.0022231	1221.9	0.0010127
1222	0.09224	1222	0.034304	1222	0.0065495	1222	0.0021698	1222	0.0010014
1222.1	0.092334	1222.1	0.03419	1222.1	0.0065097	1222.1	0.0021143	1222.1	0.00099379
1222.2	0.092469	1222.2	0.034046	1222.2	0.0064727	1222.2	0.0020541	1222.2	0.00098895
1222.2	0.092644	1222.2	0.033889	1222.2	0.0064384	1222.2	0.0020267	1222.2	0.00098603
1222.3	0.092776	1222.3	0.033757	1222.3	0.0063986	1222.3	0.001989	1222.3	0.00098001
1222.4	0.09294	1222.4	0.033607	1222.4	0.0063643	1222.4	0.0019549	1222.4	0.00098119
1222.5	0.09311	1222.5	0.033484	1222.5	0.0063422	1222.4	0.0019292	1222.5	0.00094998
1222.5	0.093275	1222.5	0.033384	1222.5	0.0063372	1222.5	0.0019058	1222.5	0.00093735
1222.6	0.093414	1222.6	0.033274	1222.6	0.0062978	1222.6	0.001883	1222.6	0.00091088
1222.7	0.093557	1222.7	0.033212	1222.7	0.0062943	1222.7	0.001875	1222.7	0.00089742
1222.7	0.093702	1222.7	0.033151	1222.7	0.0062812	1222.7	0.0018741	1222.7	0.00086798
1222.8	0.093856	1222.8	0.033115	1222.8	0.0062781	1222.8	0.0018867	1222.8	0.00083914
1222.9	0.094114	1222.9	0.033086	1222.9	0.0062682	1222.9	0.0019054	1222.9	0.00083436
1223	0.094376	1223	0.033087	1223	0.0062613	1223	0.0019391	1223	0.00082268
1223	0.094592	1223	0.033048	1223	0.0062667	1223	0.0019683	1223	0.00079321
1223.1	0.094917	1223.1	0.033053	1223.1	0.0062828	1223.1	0.002018	1223.1	0.00077713
1223.2	0.095237	1223.2	0.033098	1223.2	0.0062959	1223.2	0.0020671	1223.2	0.00075435
1223.3	0.095583	1223.3	0.033132	1223.3	0.0063002	1223.3	0.0021544	1223.3	0.00074635
1223.3	0.095927	1223.3	0.033169	1223.3	0.0063233	1223.3	0.0022324	1223.3	0.0007434
1223.4	0.096346	1223.4	0.033251	1223.4	0.0063503	1223.4	0.0023263	1223.4	0.00072804
1223.5	0.096771	1223.5	0.033342	1223.5	0.0063794	1223.5	0.0024177	1223.5	0.00073677
1223.6	0.097233	1223.6	0.033381	1223.6	0.0064153	1223.5	0.0025519	1223.6	0.00074826
1223.6	0.09776	1223.6	0.033419	1223.6	0.0064424	1223.6	0.0026907	1223.6	0.00075442
1223.7	0.09828	1223.7	0.033477	1223.7	0.0065004	1223.7	0.0028214	1223.7	0.00078583
1223.8	0.098802	1223.8	0.033506	1223.8	0.0065406	1223.8	0.0029652	1223.8	0.00080629
1223.8	0.099408	1223.8	0.033531	1223.8	0.0065875	1223.8	0.0030925	1223.8	0.00085844
1223.9	0.099942	1223.9	0.033572	1223.9	0.0066417	1223.9	0.0032595	1223.9	0.00088163
1224	0.10054	1224	0.033648	1224	0.0066973	1224	0.0034191	1224	0.00090747
1224.1	0.10114	1224.1	0.033686	1224.1	0.0067591	1224.1	0.0035723	1224.1	0.00096121
1224.1	0.10171	1224.1	0.033723	1224.1	0.0068079	1224.1	0.003719	1224.1	0.001004
1224.2	0.10231	1224.2	0.033728	1224.2	0.006838	1224.2	0.0038768	1224.2	0.0010397
1224.3	0.1029	1224.3	0.033749	1224.3	0.0068976	1224.3	0.0040115	1224.3	0.0010931
1224.4	0.1035	1224.4	0.033737	1224.4	0.0069349	1224.4	0.0041352	1224.4	0.0011451
1224.4	0.10401	1224.4	0.033718	1224.4	0.0069736	1224.4	0.0042499	1224.4	0.001194
1224.5	0.10456	1224.5	0.033727	1224.5	0.0070182	1224.5	0.0043755	1224.5	0.0012484
1224.6	0.10511	1224.6	0.033719	1224.6	0.0070415	1224.6	0.004474	1224.6	0.0012842
1224.7	0.10564	1224.7	0.03371	1224.7	0.0070571	1224.6	0.0045485	1224.7	0.0013128
1224.7	0.10608	1224.7	0.033652	1224.7	0.0070872	1224.7	0.0046011	1224.7	0.0013388
1224.8	0.10661	1224.8	0.033624	1224.8	0.0070873	1224.8	0.0046565	1224.8	0.0013828
1224.9	0.10708	1224.9	0.033604	1224.9	0.0070912	1224.9	0.0046817	1224.9	0.0013947
1224.9	0.1075	1224.9	0.033597	1224.9	0.0070892	1224.9	0.0047077	1224.9	0.0014001
1225	0.10794	1225	0.033574	1225	0.0070715	1225	0.0047042	1225	0.0014026
1225.1	0.1084	1225.1	0.033533	1225.1	0.00706	1225.1	0.0046928	1225.1	0.0013983
1225.2	0.10875	1225.2	0.033502	1225.2	0.0070283	1225.2	0.0046728	1225.2	0.0013872
1225.2	0.10912	1225.2	0.033476	1225.2	0.0070009	1225.2	0.0046456	1225.2	0.0013572
1225.3	0.10948	1225.3	0.033423	1225.3	0.0069793	1225.3	0.0045791	1225.3	0.0013219
1225.4	0.1098	1225.4	0.033431	1225.4	0.0069449	1225.4	0.0045107	1225.4	0.0012835
1225.5	0.11017	1225.5	0.033412	1225.5	0.0069125	1225.5	0.0044525	1225.5	0.0012294
1225.5	0.11051	1225.5	0.033355	1225.5	0.0068533	1225.5	0.0043747	1225.5	0.0011763
1225.6	0.11077	1225.6	0.033319	1225.6	0.0068207	1225.6	0.0043057	1225.6	0.0011194
1225.7	0.11105	1225.7	0.033272	1225.7	0.006789	1225.7	0.0042515	1225.7	0.0010531
1225.8	0.11138	1225.8	0.033234	1225.8	0.006763	1225.8	0.0041927	1225.8	0.00099801
1225.8	0.11165	1225.8	0.033225	1225.8	0.0067092	1225.8	0.0041294	1225.8	0.00094564
1225.9	0.1119	1225.9	0.033171	1225.9	0.0066789	1225.9	0.004092	1225.9	0.00087905
1226	0.11218	1226	0.033145	1226	0.0066594	1226	0.0040558	1226	0.00079907
1226.1	0.11241	1226	0.033111	1226.1	0.0066418	1226	0.0040187	1226.1	0.00074899
1226.1	0.11259	1226.1	0.033078	1226.1	0.0066078	1226.1	0.0040092	1226.1	0.00069078
1226.2	0.11286	1226.2	0.033038	1226.2	0.006598	1226.2	0.0039993	1226.2	0.00063715
1226.3	0.11316	1226.3	0.032978	1226.3	0.0065868	1226.3	0.0040007	1226.3	0.00058111
1226.3	0.11336	1226.3	0.032926	1226.3	0.0065836	1226.3	0.0040188	1226.3	0.00054628
1226.4	0.11363	1226.4	0.032867	1226.4	0.006586	1226.4	0.0040423	1226.4	0.00052216
1226.5	0.11395	1226.5	0.032817	1226.5	0.0065918	1226.5	0.0040777	1226.5	0.00048889
1226.6	0.11418	1226.6	0.032779	1226.6	0.0065947	1226.6	0.0041117	1226.6	0.00046204
1226.6	0.11448	1226.6	0.032771	1226.6	0.0066174	1226.6	0.0041602	1226.6	0.00046406
1226.7	0.1148	1226.7	0.032736	1226.7	0.0066237	1226.7	0.0042016	1226.7	0.00045846
1226.8	0.11511	1226.8	0.03269	1226.8	0.006646	1226.8	0.0042413	1226.8	0.00047894
1226.9	0.11549	1226.9	0.032695	1226.9	0.0066773	1226.9	0.004279	1226.9	0.00050176
1226.9	0.11597	1226.9	0.032683	1226.9	0.0066999	1226.9	0.0043205	1226.9	0.00054139
1227	0.11639	1227	0.03263	1227	0.0067267	1227	0.0043738	1227	0.00059454
1227.1	0.11688	1227.1	0.032587	1227.1	0.0067525	1227.1	0.0043978	1227.1	0.00066535
1227.2	0.11745	1227.2	0.032605	1227.2	0.0067848	1227.2	0.0043835	1227.2	0.00072188
1227.2	0.118	1227.2	0.032631	1227.2	0.006801	1227.2	0.0043648	1227.2	0.00080685
1227.3	0.11854	1227.3	0.032646	1227.3	0.0068168	1227.3	0.0043541	1227.3	0.00089048
1227.4	0.11917	1227.4	0.032705	1227.4	0.0068422	1227.4	0.0043327	1227.4	0.00098092
1227.5	0.11982	1227.4	0.032774	1227.5	0.0068771	1227.4	0.0043028	1227.5	0.0010692
1227.5	0.1205	1227.5	0.032867	1227.5	0.0068929	1227.5	0.0042375	1227.5	0.0011841
1227.6	0.12126	1227.6	0.032962	1227.6	0.0069085	1227.6	0.0041675	1227.6	0.0012983
1227.7	0.12193	1227.7	0.033037	1227.7	0.0069054	1227.7	0.0040841	1227.7	0.0014169
1227.7	0.12267	1227.7	0.033149	1227.7	0.0069278	1227.7	0.0039622	1227.7	0.0015389
1227.8	0.12339	1227.8	0.033258	1227.8	0.0069648	1227.8	0.0038581	1227.8	0.0016601
1227.9	0.12419	1227.9	0.033366	1227.9	0.0069623	1227.9	0.0037499	1227.9	0.0017718
1228	0.12495	1228	0.033501	1228	0.0069776	1228	0.0036419	1228	0.0018782
1228	0.12576	1228	0.033611	1228	0.0069792	1228	0.0035175	1228	0.0019763
1228.1	0.12658	1228.1	0.033744	1228.1	0.0069856	1228.1	0.0033815	1228.1	0.0020787
1228.2	0.12736	1228.2	0.033863	1228.2	0.0069969	1228.2	0.0032441	1228.2	0.0021828
1228.3	0.12811	1228.3	0.033979	1228.3	0.0070147	1228.3	0.0031436	1228.3	0.0022732
1228.3	0.12895	1228.3	0.034138	1228.3	0.0070276	1228.3	0.0030275	1228.3	0.0023496
1228.4	0.12973	1228.4	0.034242	1228.4	0.0070462	1228.4	0.0029179	1228.4	0.0024007
1228.5	0.13046	1228.5	0.034326	1228.5	0.0070737	1228.5	0.0028213	1228.5	0.0024613
1228.6	0.13125	1228.6	0.034364	1228.6	0.0070874	1228.6	0.0027364	1228.6	0.002514
1228.6	0.13205	1228.6	0.034447	1228.6	0.0071117	1228.6	0.0026413	1228.6	0.0025505
1228.7	0.13276	1228.7	0.034533	1228.7	0.0071401	1228.7	0.0025661	1228.7	0.0025727
1228.8	0.13345	1228.8	0.034548	1228.8	0.0071676	1228.8	0.0024866	1228.8	0.0025956
1228.9	0.13425	1228.9	0.034622	1228.9	0.0072014	1228.9	0.002422	1228.9	0.0025926
1228.9	0.13496	1228.9	0.03465	1228.9	0.0072285	1228.9	0.0023924	1228.9	0.002592
1229	0.13566	1229	0.03463	1229	0.0072733	1229	0.002358	1229	0.0025844
1229.1	0.13635	1229.1	0.034586	1229.1	0.0072983	1229.1	0.0023298	1229.1	0.0025743
1229.2	0.13698	1229.1	0.034578	1229.2	0.007334	1229.1	0.0023339	1229.2	0.0025536
1229.2	0.13764	1229.2	0.034571	1229.2	0.0073518	1229.2	0.0023113	1229.2	0.0025236
1229.3	0.13834	1229.3	0.034549	1229.3	0.0073651	1229.3	0.0022937	1229.3	0.0024817
1229.4	0.13894	1229.4	0.034521	1229.4	0.0073856	1229.4	0.0023074	1229.4	0.0024345
1229.4	0.13943	1229.4	0.034496	1229.4	0.0074141	1229.4	0.0023299	1229.4	0.0023809
1229.5	0.14005	1229.5	0.034483	1229.5	0.0074222	1229.5	0.0023413	1229.5	0.0023312
1229.6	0.14061	1229.6	0.03449	1229.6	0.0074353	1229.6	0.0023583	1229.6	0.0022804
1229.7	0.14113	1229.7	0.034481	1229.7	0.0074222	1229.7	0.0023852	1229.7	0.0022256
1229.7	0.14172	1229.7	0.034482	1229.7	0.0074036	1229.7	0.0024265	1229.7	0.002182
1229.8	0.14225	1229.8	0.034493	1229.8	0.0073814	1229.8	0.0024639	1229.8	0.0021266
1229.9	0.14271	1229.9	0.034513	1229.9	0.0073439	1229.9	0.0025046	1229.9	0.0020582
1230	0.14327	1230	0.034532	1230	0.007299	1230	0.0025412	1230	0.0019909
1230	0.14387	1230	0.034556	1230	0.0072427	1230	0.0025901	1230	0.0019151
1230.1	0.14434	1230.1	0.034605	1230.1	0.0071994	1230.1	0.0026466	1230.1	0.0018606
1230.2	0.14492	1230.2	0.034623	1230.2	0.0071466	1230.2	0.0027075	1230.2	0.0017971
1230.3	0.14551	1230.3	0.034646	1230.3	0.0070848	1230.3	0.0027795	1230.3	0.0017187
1230.3	0.14608	1230.3	0.034703	1230.3	0.00702	1230.3	0.0028509	1230.3	0.0016527
1230.4	0.1467	1230.4	0.034756	1230.4	0.0069584	1230.4	0.0029489	1230.4	0.0015686
1230.5	0.14739	1230.5	0.034771	1230.5	0.0068845	1230.5	0.0030068	1230.5	0.0015094
1230.6	0.148	1230.6	0.034795	1230.6	0.0068191	1230.6	0.0030865	1230.6	0.0014461
1230.6	0.14868	1230.6	0.034815	1230.6	0.0067598	1230.6	0.0031576	1230.6	0.0013784
1230.7	0.14946	1230.7	0.034866	1230.7	0.0066987	1230.7	0.0032456	1230.7	0.0013
1230.8	0.15015	1230.8	0.034876	1230.8	0.0066392	1230.8	0.0033293	1230.8	0.0012331
1230.9	0.1509	1230.9	0.034893	1230.9	0.0066048	1230.9	0.0034233	1230.9	0.0011656
1230.9	0.15179	1230.9	0.034911	1230.9	0.0065537	1230.9	0.0035094	1230.9	0.0011156
1231	0.15264	1231	0.034906	1231	0.0065135	1231	0.0035929	1231	0.0010579
1231.1	0.15343	1231.1	0.034891	1231.1	0.0064709	1231.1	0.003655	1231.1	0.0010053
1231.2	0.15432	1231.2	0.034843	1231.2	0.0064592	1231.1	0.0037398	1231.2	0.00094204
1231.2	0.15514	1231.2	0.034798	1231.2	0.0064565	1231.2	0.003812	1231.2	0.00088183
1231.3	0.15604	1231.3	0.034772	1231.3	0.0064508	1231.3	0.0038738	1231.3	0.00082339
1231.4	0.15692	1231.4	0.03474	1231.4	0.0064338	1231.4	0.0039459	1231.4	0.00077267
1231.5	0.15787	1231.4	0.034665	1231.5	0.0064255	1231.4	0.0039747	1231.5	0.00073456
1231.5	0.15872	1231.5	0.034587	1231.5	0.0064342	1231.5	0.0040109	1231.5	0.00069698
1231.6	0.15963	1231.6	0.034452	1231.6	0.0064427	1231.6	0.0040453	1231.6	0.00068094
1231.7	0.1605	1231.7	0.034372	1231.7	0.0064714	1231.7	0.0040601	1231.7	0.00063954
1231.7	0.16133	1231.7	0.034212	1231.7	0.0064846	1231.7	0.0040704	1231.7	0.00060566
1231.8	0.16215	1231.8	0.034121	1231.8	0.0065085	1231.8	0.0040906	1231.8	0.00056964
1231.9	0.16301	1231.9	0.034012	1231.9	0.0065258	1231.9	0.0040864	1231.9	0.00053625
1232	0.16385	1232	0.033861	1232	0.0065485	1232	0.0040661	1232	0.00050462
1232	0.16465	1232	0.033733	1232	0.0065645	1232	0.0040472	1232	0.00049552
1232.1	0.16547	1232.1	0.033578	1232.1	0.0065656	1232.1	0.0040178	1232.1	0.00048071
1232.2	0.16632	1232.2	0.033459	1232.2	0.0065883	1232.2	0.0039897	1232.2	0.00046944
1232.3	0.16708	1232.3	0.033329	1232.3	0.0065899	1232.3	0.0039578	1232.3	0.0004554
1232.3	0.16789	1232.3	0.033189	1232.3	0.0066016	1232.3	0.0039243	1232.3	0.0004402
1232.4	0.16876	1232.4	0.033067	1232.4	0.0066068	1232.4	0.0038919	1232.4	0.00042662
1232.5	0.1695	1232.5	0.032897	1232.5	0.0066132	1232.5	0.0038562	1232.5	0.00042543
1232.6	0.17027	1232.6	0.032799	1232.6	0.0066083	1232.6	0.0038309	1232.6	0.0004328
1232.6	0.17116	1232.6	0.032736	1232.6	0.0065949	1232.6	0.0037891	1232.6	0.00043526
1232.7	0.17194	1232.7	0.032662	1232.7	0.0065915	1232.7	0.0037686	1232.7	0.0004312
1232.8	0.17273	1232.8	0.032602	1232.8	0.006586	1232.8	0.0037251	1232.8	0.00043154
1232.9	0.17361	1232.9	0.032542	1232.9	0.0065716	1232.9	0.0037061	1232.9	0.0004494
1232.9	0.17443	1232.9	0.032531	1232.9	0.0065647	1232.9	0.0037007	1232.9	0.00046963
1233	0.17527	1233	0.032537	1233	0.0065277	1233	0.0036825	1233	0.00050257
1233.1	0.17625	1233.1	0.032569	1233.1	0.0065165	1233.1	0.0036769	1233.1	0.00051721
1233.2	0.17712	1233.2	0.032606	1233.2	0.0064955	1233.2	0.0036761	1233.2	0.00054437
1233.2	0.17794	1233.2	0.03265	1233.2	0.0064619	1233.2	0.0036775	1233.2	0.00057463
1233.3	0.17895	1233.3	0.032731	1233.3	0.0064378	1233.3	0.0036901	1233.3	0.00060483
1233.4	0.1799	1233.4	0.032778	1233.4	0.0064165	1233.4	0.0036902	1233.4	0.00062798
1233.5	0.18079	1233.5	0.032872	1233.5	0.0063921	1233.5	0.0037194	1233.5	0.00065217
1233.5	0.18183	1233.5	0.032987	1233.5	0.0063721	1233.5	0.0037416	1233.5	0.00068392
1233.6	0.18289	1233.6	0.033102	1233.6	0.0063512	1233.6	0.00377	1233.6	0.00070796
1233.7	0.18379	1233.7	0.033192	1233.7	0.0063214	1233.7	0.0037953	1233.7	0.00074856
1233.8	0.18481	1233.8	0.033294	1233.8	0.0062956	1233.8	0.003835	1233.8	0.00075579
1233.8	0.18589	1233.8	0.033397	1233.8	0.0062739	1233.8	0.0038755	1233.8	0.00077322
1233.9	0.18681	1233.9	0.03347	1233.9	0.0062537	1233.9	0.0038925	1233.9	0.00079331
1234	0.1879	1234	0.033541	1234	0.0062396	1234	0.0039128	1234	0.00080831
1234.1	0.18904	1234.1	0.033605	1234.1	0.0062194	1234.1	0.0039285	1234.1	0.00082897
1234.1	0.19003	1234.1	0.033624	1234.1	0.006216	1234.1	0.0039738	1234.1	0.0008297
1234.2	0.19111	1234.2	0.033679	1234.2	0.006203	1234.2	0.0040143	1234.2	0.00081996
1234.3	0.19226	1234.3	0.033696	1234.3	0.0061933	1234.3	0.0040514	1234.3	0.00081354
1234.4	0.19328	1234.4	0.033687	1234.4	0.0061842	1234.3	0.0040732	1234.4	0.00082766
1234.4	0.19433	1234.4	0.033683	1234.4	0.0061814	1234.4	0.0041031	1234.4	0.00083011
1234.5	0.19547	1234.5	0.03366	1234.5	0.0061752	1234.5	0.0041197	1234.5	0.00081487
1234.6	0.19649	1234.6	0.033618	1234.6	0.0061805	1234.6	0.0041366	1234.6	0.00079667
1234.7	0.19748	1234.7	0.033561	1234.7	0.0061793	1234.6	0.0041551	1234.7	0.00077326
1234.7	0.19861	1234.7	0.033515	1234.7	0.0061849	1234.7	0.0041882	1234.7	0.00074121
1234.8	0.19962	1234.8	0.033463	1234.8	0.0061854	1234.8	0.0042269	1234.8	0.0007343
1234.9	0.20057	1234.9	0.033364	1234.9	0.0061762	1234.9	0.0042391	1234.9	0.00071878
1235	0.20158	1234.9	0.03327	1235	0.0061847	1234.9	0.004263	1235	0.0007014
1235	0.20257	1235	0.033161	1235	0.0061946	1235	0.0042763	1235	0.0006742
1235.1	0.20345	1235.1	0.033083	1235.1	0.0061928	1235.1	0.0042995	1235.1	0.0006439
1235.2	0.2044	1235.2	0.033006	1235.2	0.0062149	1235.2	0.0043028	1235.2	0.0006246
1235.3	0.20527	1235.2	0.032939	1235.3	0.0062242	1235.2	0.0043072	1235.3	0.0005761
1235.3	0.2061	1235.3	0.032883	1235.3	0.006212	1235.3	0.0043328	1235.3	0.00056729
1235.4	0.20689	1235.4	0.032859	1235.4	0.0062175	1235.4	0.0043402	1235.4	0.00053702
1235.5	0.20776	1235.5	0.032814	1235.5	0.0062179	1235.5	0.004323	1235.5	0.00050113
1235.6	0.20854	1235.5	0.032741	1235.6	0.0062185	1235.5	0.0043113	1235.5	0.00048523
1235.6	0.20925	1235.6	0.03274	1235.6	0.0062236	1235.6	0.0043193	1235.6	0.0004774
1235.7	0.20995	1235.7	0.032705	1235.7	0.0062261	1235.7	0.0043065	1235.7	0.00044891
1235.8	0.21073	1235.8	0.032743	1235.8	0.0062351	1235.8	0.0042824	1235.8	0.00042675
1235.9	0.2114	1235.8	0.03279	1235.9	0.0062327	1235.8	0.0042704	1235.8	0.0004119
1235.9	0.21206	1235.9	0.032833	1235.9	0.0062336	1235.9	0.0042445	1235.9	0.00038624
1236	0.21286	1236	0.03289	1236	0.0062344	1236	0.0042481	1236	0.00037753
1236.1	0.21354	1236.1	0.032975	1236.1	0.0062299	1236.1	0.0042239	1236.1	0.00036123
1236.2	0.21425	1236.1	0.033086	1236.2	0.0062359	1236.1	0.0042129	1236.1	0.00035466
1236.2	0.21507	1236.2	0.033202	1236.2	0.0062444	1236.2	0.0041749	1236.2	0.00033219
1236.3	0.21579	1236.3	0.033318	1236.3	0.0062556	1236.3	0.0041645	1236.3	0.00032469
1236.4	0.21657	1236.4	0.033479	1236.4	0.0062588	1236.4	0.0041417	1236.4	0.0003261
1236.4	0.21749	1236.4	0.033672	1236.4	0.0062689	1236.4	0.0041552	1236.4	0.00032302
1236.5	0.21833	1236.5	0.033874	1236.5	0.0062847	1236.5	0.0041499	1236.5	0.00032298
1236.6	0.21915	1236.6	0.034072	1236.6	0.0062876	1236.6	0.0041477	1236.6	0.00033296
1236.7	0.22015	1236.7	0.03426	1236.7	0.0063108	1236.7	0.0041551	1236.7	0.00032664
1236.7	0.22107	1236.7	0.034454	1236.7	0.0063224	1236.7	0.004168	1236.7	0.00035451
1236.8	0.22199	1236.8	0.034672	1236.8	0.0063371	1236.8	0.004196	1236.8	0.00036563
1236.9	0.22312	1236.9	0.034876	1236.9	0.0063566	1236.9	0.0042161	1236.9	0.00037633
1237	0.22417	1237	0.035057	1237	0.0063775	1237	0.0042567	1237	0.0003836
1237	0.22518	1237	0.035266	1237	0.0063906	1237	0.0043235	1237	0.00038734
1237.1	0.22637	1237.1	0.035476	1237.1	0.0064142	1237.1	0.0043744	1237.1	0.00040476
1237.2	0.22752	1237.2	0.035621	1237.2	0.00644	1237.2	0.0044188	1237.2	0.00041612
1237.3	0.22854	1237.3	0.035762	1237.3	0.0064595	1237.3	0.0044783	1237.3	0.00042339
1237.3	0.2298	1237.3	0.035915	1237.3	0.0064916	1237.3	0.0045491	1237.3	0.0004085
1237.4	0.23105	1237.4	0.036028	1237.4	0.0065196	1237.4	0.0046237	1237.4	0.00041793
1237.5	0.23223	1237.5	0.036151	1237.5	0.0065353	1237.5	0.0046887	1237.5	0.00042411
1237.6	0.23357	1237.6	0.036256	1237.6	0.006551	1237.6	0.0047644	1237.6	0.00042698
1237.6	0.23491	1237.6	0.036328	1237.6	0.0065752	1237.6	0.0048417	1237.6	0.00040678
1237.7	0.23607	1237.7	0.036368	1237.7	0.0065803	1237.7	0.0048794	1237.7	0.00038701
1237.8	0.23743	1237.8	0.036422	1237.8	0.0065932	1237.8	0.0049341	1237.8	0.00036096
1237.9	0.23894	1237.9	0.036438	1237.9	0.0066061	1237.9	0.0049675	1237.9	0.00034185
1237.9	0.24023	1237.9	0.036438	1237.9	0.0066126	1237.9	0.0049963	1237.9	0.00031163
1238	0.2416	1238	0.03644	1238	0.0066209	1238	0.0050145	1238	0.00026077
1238.1	0.24312	1238.1	0.036401	1238.1	0.0066074	1238.1	0.0050253	1238.1	0.00023745
1238.2	0.24453	1238.2	0.036328	1238.2	0.0065937	1238.2	0.0050229	1238.2	0.00021094
1238.2	0.24593	1238.2	0.036294	1238.2	0.0066018	1238.2	0.0050278	1238.2	0.00016482
1238.3	0.24752	1238.3	0.03622	1238.3	0.0066095	1238.3	0.0049965	1238.3	0.00011254
1238.4	0.249	1238.4	0.036087	1238.4	0.0065981	1238.4	0.0049651	1238.4	7.4015e-05
1238.5	0.25047	1238.5	0.035981	1238.5	0.00658	1238.5	0.0049067	1238.5	2.38e-05
1238.6	0.25204	1238.5	0.035898	1238.6	0.0065583	1238.5	0.0048637	1238.5	-2.7395e-05
1238.6	0.25361	1238.6	0.03581	1238.6	0.0065422	1238.6	0.0047921	1238.6	-6.5912e-05
1238.7	0.2551	1238.7	0.035671	1238.7	0.0065371	1238.7	0.0047228	1238.7	-0.00011173
1238.8	0.2566	1238.8	0.035522	1238.8	0.0065137	1238.8	0.0046279	1238.8	-0.00015552
1238.9	0.2581	1238.8	0.035362	1238.9	0.0064818	1238.8	0.0045394	1238.8	-0.00019582
1238.9	0.2596	1238.9	0.03523	1238.9	0.0064525	1238.9	0.0044419	1238.9	-0.00023777
1239	0.26108	1239	0.035052	1239	0.0064418	1239	0.0043335	1239	-0.00027674
1239.1	0.26249	1239.1	0.0349	1239.1	0.006416	1239.1	0.0042168	1239.1	-0.00030831
1239.2	0.2639	1239.1	0.034705	1239.2	0.0063978	1239.1	0.0041202	1239.2	-0.00032489
1239.2	0.26523	1239.2	0.034554	1239.2	0.0063776	1239.2	0.0040212	1239.2	-0.00035213
1239.3	0.26654	1239.3	0.034372	1239.3	0.0063527	1239.3	0.0039082	1239.3	-0.0003787
1239.4	0.26789	1239.4	0.034205	1239.4	0.0063381	1239.4	0.0037962	1239.4	-0.00039206
1239.5	0.2691	1239.4	0.034009	1239.5	0.0063152	1239.4	0.0036937	1239.5	-0.00041827
1239.5	0.27023	1239.5	0.033818	1239.5	0.0062956	1239.5	0.0035632	1239.5	-0.0004414
1239.6	0.27145	1239.6	0.033672	1239.6	0.0062727	1239.6	0.0034657	1239.6	-0.00044516
1239.7	0.27244	1239.7	0.033494	1239.7	0.0062517	1239.7	0.0033369	1239.7	-0.00045825
1239.8	0.27345	1239.8	0.033338	1239.8	0.0062331	1239.7	0.0032199	1239.8	-0.00046795
1239.8	0.27459	1239.8	0.033221	1239.8	0.0061978	1239.8	0.0031069	1239.8	-0.00049009
1239.9	0.27551	1239.9	0.033105	1239.9	0.0061649	1239.9	0.0030086	1239.9	-0.00048964
1240	0.27644	1240	0.03298	1240	0.0061251	1240	0.0029139	1240	-0.00050929
1240.1	0.27742	1240.1	0.03289	1240.1	0.0061056	1240	0.0028239	1240.1	-0.0005339
1240.1	0.2783	1240.1	0.032804	1240.1	0.0060669	1240.1	0.0027134	1240.1	-0.00053768
1240.2	0.27914	1240.2	0.032748	1240.2	0.0060471	1240.2	0.0026098	1240.2	-0.00055047
1240.3	0.28015	1240.3	0.03271	1240.3	0.006009	1240.3	0.0025292	1240.3	-0.0005703
1240.4	0.28105	1240.4	0.032742	1240.4	0.0059812	1240.4	0.0024662	1240.4	-0.00058907
1240.4	0.28188	1240.4	0.032736	1240.4	0.0059525	1240.4	0.0023866	1240.4	-0.0006283
1240.5	0.2829	1240.5	0.032739	1240.5	0.0059256	1240.5	0.0023249	1240.5	-0.00065959
1240.6	0.28387	1240.6	0.032774	1240.6	0.005891	1240.6	0.0022968	1240.6	-0.00067765
1240.7	0.28469	1240.7	0.032843	1240.7	0.0058625	1240.7	0.0022345	1240.7	-0.00071146
1240.7	0.28576	1240.7	0.032913	1240.7	0.0058537	1240.7	0.0021962	1240.7	-0.0007293
1240.8	0.28689	1240.8	0.032998	1240.8	0.0058382	1240.8	0.0021702	1240.8	-0.00073993
1240.9	0.28784	1240.9	0.033091	1240.9	0.0058139	1240.9	0.0021907	1240.9	-0.00077822
1241	0.28902	1241	0.033213	1241	0.005809	1241	0.0021933	1241	-0.00079302
1241	0.29025	1241	0.033347	1241	0.0058	1241	0.002214	1241	-0.00081289
1241.1	0.29128	1241.1	0.033463	1241.1	0.0057984	1241.1	0.0022422	1241.1	-0.00083413
1241.2	0.29256	1241.2	0.033579	1241.2	0.0058099	1241.2	0.0022858	1241.2	-0.0008718
1241.3	0.29395	1241.3	0.033707	1241.3	0.0058102	1241.3	0.0023512	1241.3	-0.0008746
1241.3	0.29514	1241.3	0.033819	1241.3	0.0058083	1241.3	0.002418	1241.3	-0.00087287
1241.4	0.2965	1241.4	0.033928	1241.4	0.0058296	1241.4	0.0025111	1241.4	-0.00087776
1241.5	0.29797	1241.5	0.034023	1241.5	0.0058345	1241.5	0.0025886	1241.5	-0.00087269
1241.6	0.2992	1241.6	0.034099	1241.6	0.0058527	1241.6	0.0026779	1241.6	-0.00087223
1241.6	0.30061	1241.6	0.034172	1241.6	0.005866	1241.6	0.002772	1241.6	-0.00085074
1241.7	0.3022	1241.7	0.03425	1241.7	0.0058979	1241.7	0.0028773	1241.7	-0.00083142
1241.8	0.3036	1241.8	0.034295	1241.8	0.0059293	1241.8	0.003005	1241.8	-0.00081584
1241.9	0.305	1241.9	0.034345	1241.9	0.0059798	1241.9	0.0031371	1241.9	-0.00080343
1241.9	0.30659	1241.9	0.034339	1241.9	0.0059962	1241.9	0.0032272	1241.9	-0.00078404
1242	0.30805	1242	0.034334	1242	0.006024	1242	0.0033258	1242	-0.00074687
1242.1	0.30946	1242.1	0.034366	1242.1	0.0060626	1242.1	0.0034213	1242.1	-0.00071982
1242.2	0.31104	1242.2	0.034323	1242.2	0.0060958	1242.2	0.0035104	1242.2	-0.000703
1242.2	0.31254	1242.2	0.034263	1242.2	0.0061443	1242.2	0.0035832	1242.2	-0.00066867
1242.3	0.3139	1242.3	0.034167	1242.3	0.0061828	1242.3	0.0036477	1242.3	-0.00063678
1242.4	0.31539	1242.4	0.03409	1242.4	0.00621	1242.4	0.0037121	1242.4	-0.00059631
1242.5	0.31689	1242.5	0.03399	1242.5	0.0062655	1242.5	0.0037721	1242.5	-0.00057343
1242.5	0.3183	1242.5	0.033904	1242.5	0.0063094	1242.5	0.0037991	1242.5	-0.00055703
1242.6	0.31968	1242.6	0.033807	1242.6	0.0063718	1242.6	0.0038141	1242.6	-0.00053605
1242.7	0.32118	1242.7	0.033714	1242.7	0.0064178	1242.7	0.0038056	1242.7	-0.00050676
1242.8	0.32264	1242.8	0.033602	1242.8	0.0064756	1242.8	0.0038142	1242.8	-0.00048718
1242.8	0.32406	1242.8	0.033494	1242.8	0.0065349	1242.8	0.0037942	1242.8	-0.00046854
1242.9	0.32545	1242.9	0.033378	1242.9	0.0065827	1242.9	0.0037531	1242.9	-0.00046851
1243	0.32687	1243	0.033282	1243	0.0066375	1243	0.0037035	1243	-0.00045034
1243.1	0.32821	1243.1	0.033177	1243.1	0.0066892	1243.1	0.0036407	1243.1	-0.00044148
1243.2	0.32959	1243.1	0.033121	1243.2	0.0067473	1243.1	0.0035636	1243.1	-0.00041538
1243.2	0.33111	1243.2	0.033055	1243.2	0.0067879	1243.2	0.0034702	1243.2	-0.00038868
1243.3	0.33243	1243.3	0.032965	1243.3	0.0068247	1243.3	0.0033825	1243.3	-0.00037381
1243.4	0.33384	1243.4	0.032973	1243.4	0.0068623	1243.4	0.003269	1243.4	-0.00032843
1243.5	0.3353	1243.5	0.032974	1243.5	0.0069093	1243.4	0.0031698	1243.5	-0.00030769
1243.5	0.33664	1243.5	0.032971	1243.5	0.0069472	1243.5	0.0030557	1243.5	-0.00025895
1243.6	0.33795	1243.6	0.032979	1243.6	0.0069849	1243.6	0.0029342	1243.6	-0.00021936
1243.7	0.33954	1243.7	0.033082	1243.7	0.0070163	1243.7	0.0028048	1243.7	-0.00014874
1243.8	0.34093	1243.8	0.033173	1243.8	0.0070185	1243.8	0.0026805	1243.8	-8.904e-05
1243.8	0.34225	1243.8	0.03328	1243.8	0.007035	1243.8	0.0025727	1243.8	-2.8607e-05
1243.9	0.34386	1243.9	0.033407	1243.9	0.0070262	1243.9	0.0024769	1243.9	3.1366e-05
1244	0.34531	1244	0.033562	1244	0.0070412	1244	0.0023683	1244	9.1169e-05
1244.1	0.34662	1244.1	0.033705	1244.1	0.007028	1244.1	0.0022591	1244.1	0.00017308
1244.1	0.34823	1244.1	0.033913	1244.1	0.0070149	1244.1	0.0021664	1244.1	0.00025283
1244.2	0.34983	1244.2	0.034115	1244.2	0.0070035	1244.2	0.0020708	1244.2	0.00033053
1244.3	0.35119	1244.3	0.034326	1244.3	0.0069897	1244.3	0.0019925	1244.3	0.00040397
1244.4	0.35291	1244.4	0.034565	1244.4	0.0069648	1244.4	0.001954	1244.4	0.00048901
1244.4	0.35457	1244.4	0.034805	1244.4	0.0069377	1244.4	0.0019132	1244.4	0.00057374
1244.5	0.35601	1244.5	0.035028	1244.5	0.0069073	1244.5	0.0018801	1244.5	0.00063156
1244.6	0.35771	1244.6	0.035275	1244.6	0.0068745	1244.6	0.0018513	1244.6	0.00070383
1244.7	0.3595	1244.7	0.035504	1244.7	0.0068449	1244.7	0.0018552	1244.7	0.00077936
1244.7	0.36101	1244.7	0.035733	1244.7	0.0068107	1244.7	0.001861	1244.7	0.00084394
1244.8	0.3628	1244.8	0.035951	1244.8	0.0067628	1244.8	0.0018759	1244.8	0.00089866
1244.9	0.36469	1244.9	0.036137	1244.9	0.0067143	1244.9	0.0019121	1244.9	0.00096771
1245	0.36627	1245	0.036324	1245	0.0066956	1245	0.0019446	1245	0.0010006
1245	0.36811	1245	0.036463	1245	0.0066668	1245	0.0020012	1245	0.001031
1245.1	0.37009	1245.1	0.036623	1245.1	0.0066209	1245.1	0.0020697	1245.1	0.001064
1245.2	0.3718	1245.2	0.036758	1245.2	0.0065747	1245.2	0.0021438	1245.2	0.001087
1245.3	0.37365	1245.3	0.036852	1245.3	0.006529	1245.3	0.0022346	1245.3	0.0010966
1245.4	0.37567	1245.3	0.036956	1245.4	0.0064955	1245.3	0.002303	1245.3	0.0011014
1245.4	0.37743	1245.4	0.036981	1245.4	0.0064445	1245.4	0.0024029	1245.4	0.0010904
1245.5	0.37926	1245.5	0.037046	1245.5	0.0063986	1245.5	0.0024716	1245.5	0.0010852
1245.6	0.38124	1245.6	0.037064	1245.6	0.00634	1245.6	0.0025554	1245.6	0.0010598
1245.7	0.38306	1245.7	0.037076	1245.7	0.0062905	1245.6	0.0026442	1245.7	0.0010421
1245.7	0.38489	1245.7	0.037081	1245.7	0.0062334	1245.7	0.0027422	1245.7	0.0010209
1245.8	0.38682	1245.8	0.037031	1245.8	0.0061729	1245.8	0.0028327	1245.8	0.00099316
1245.9	0.38867	1245.9	0.036991	1245.9	0.0061315	1245.9	0.002899	1245.9	0.00096594
1246	0.39039	1246	0.036969	1246	0.006085	1246	0.0029654	1246	0.00092346
1246	0.39227	1246	0.036907	1246	0.0060378	1246	0.003062	1246	0.00086931
1246.1	0.39411	1246.1	0.036857	1246.1	0.0060067	1246.1	0.0031367	1246.1	0.0008187
1246.2	0.39584	1246.2	0.036826	1246.2	0.0059492	1246.2	0.0031886	1246.2	0.00077451
1246.3	0.3976	1246.3	0.036771	1246.3	0.0059216	1246.3	0.0032746	1246.3	0.00071173
1246.3	0.39933	1246.3	0.036715	1246.3	0.0058925	1246.3	0.00334	1246.3	0.00064688
1246.4	0.40097	1246.4	0.036653	1246.4	0.0058686	1246.4	0.0034186	1246.4	0.00056343
1246.5	0.4026	1246.5	0.036585	1246.5	0.0058458	1246.5	0.0034584	1246.5	0.00048045
1246.6	0.40422	1246.6	0.036601	1246.6	0.0058173	1246.6	0.0035154	1246.6	0.00039819
1246.6	0.40583	1246.6	0.036588	1246.6	0.0058167	1246.6	0.0035601	1246.6	0.00033428
1246.7	0.40737	1246.7	0.036596	1246.7	0.0058061	1246.7	0.0036083	1246.7	0.00024779
1246.8	0.40892	1246.8	0.036635	1246.8	0.0058126	1246.8	0.003645	1246.8	0.00017311
1246.9	0.41051	1246.9	0.03667	1246.9	0.0058069	1246.9	0.0036966	1246.9	8.6906e-05
1246.9	0.41194	1246.9	0.036717	1246.9	0.0058266	1246.9	0.0037283	1246.9	4.8822e-07
1247	0.41345	1247	0.036785	1247	0.0058563	1247	0.0037464	1247	-7.0326e-05
1247.1	0.415	1247.1	0.036861	1247.1	0.0058766	1247.1	0.0037701	1247.1	-0.00016572
1247.2	0.41642	1247.2	0.036963	1247.2	0.0058815	1247.2	0.0037842	1247.2	-0.00024263
1247.3	0.41781	1247.2	0.037072	1247.3	0.0059071	1247.2	0.0037829	1247.3	-0.00031613
1247.3	0.41941	1247.3	0.037214	1247.3	0.0059155	1247.3	0.0038015	1247.3	-0.00037757
1247.4	0.42077	1247.4	0.037342	1247.4	0.0059366	1247.4	0.0037961	1247.4	-0.00047174
1247.5	0.42211	1247.5	0.037495	1247.5	0.0059524	1247.5	0.0037703	1247.5	-0.00052034
1247.6	0.42373	1247.6	0.037654	1247.6	0.0059686	1247.6	0.0037363	1247.6	-0.00058081
1247.6	0.42515	1247.6	0.037825	1247.6	0.0059973	1247.6	0.0037027	1247.6	-0.00062488
1247.7	0.42644	1247.7	0.037993	1247.7	0.0059998	1247.7	0.0036615	1247.7	-0.00066357
1247.8	0.4281	1247.8	0.038177	1247.8	0.0060156	1247.8	0.0036238	1247.8	-0.00070591
1247.9	0.42963	1247.9	0.038357	1247.9	0.0060155	1247.9	0.0035652	1247.9	-0.00073147
1247.9	0.43089	1247.9	0.038561	1247.9	0.0060218	1247.9	0.0034988	1247.9	-0.0007617
1248	0.43255	1248	0.038751	1248	0.0060395	1248	0.0034253	1248	-0.00078347
1248.1	0.43417	1248.1	0.038904	1248.1	0.0060358	1248.1	0.0033392	1248.1	-0.00079716
1248.2	0.43555	1248.2	0.039052	1248.2	0.0060335	1248.2	0.0032475	1248.2	-0.00081661
1248.2	0.43727	1248.2	0.039225	1248.2	0.0060267	1248.2	0.0031585	1248.2	-0.00081514
1248.3	0.43905	1248.3	0.039376	1248.3	0.0060355	1248.3	0.0030649	1248.3	-0.00081024
1248.4	0.44051	1248.4	0.039544	1248.4	0.006034	1248.4	0.0029849	1248.4	-0.00080447
1248.5	0.44224	1248.5	0.039656	1248.5	0.0060367	1248.5	0.0028944	1248.5	-0.00080113
1248.6	0.44417	1248.5	0.039785	1248.6	0.0060395	1248.5	0.0028036	1248.5	-0.00078677
1248.6	0.44575	1248.6	0.039919	1248.6	0.0060537	1248.6	0.0027279	1248.6	-0.00078632
1248.7	0.44752	1248.7	0.040019	1248.7	0.006049	1248.7	0.002668	1248.7	-0.00077685
1248.8	0.44954	1248.8	0.040115	1248.8	0.0060607	1248.8	0.0025955	1248.8	-0.00076041
1248.9	0.45117	1248.9	0.040213	1248.9	0.0060894	1248.8	0.00255	1248.9	-0.00075573
1248.9	0.45297	1248.9	0.040292	1248.9	0.0061159	1248.9	0.0025111	1248.9	-0.00073627
1249	0.45504	1249	0.040362	1249	0.0061374	1249	0.0024671	1249	-0.00071102
1249.1	0.45686	1249.1	0.040385	1249.1	0.0061579	1249.1	0.0024576	1249.1	-0.00068698
1249.2	0.45866	1249.2	0.040461	1249.2	0.0061805	1249.2	0.0024492	1249.2	-0.00066138
1249.2	0.46073	1249.2	0.040481	1249.2	0.0062106	1249.2	0.002455	1249.2	-0.00065449
1249.3	0.46261	1249.3	0.0405	1249.3	0.0062366	1249.3	0.0024703	1249.3	-0.00061952
1249.4	0.46443	1249.4	0.040494	1249.4	0.0062675	1249.4	0.0025082	1249.4	-0.00060297
1249.5	0.46644	1249.5	0.040508	1249.5	0.0063049	1249.5	0.0025629	1249.5	-0.00056465
1249.5	0.4683	1249.5	0.040523	1249.5	0.0063416	1249.5	0.0026267	1249.5	-0.00053419
1249.6	0.47004	1249.6	0.040526	1249.6	0.006356	1249.6	0.0027218	1249.6	-0.00048967
1249.7	0.47197	1249.7	0.040508	1249.7	0.006374	1249.7	0.002818	1249.7	-0.00044356
1249.8	0.47383	1249.8	0.040489	1249.8	0.0063951	1249.8	0.002919	1249.8	-0.00039108
1249.8	0.47546	1249.8	0.040484	1249.8	0.0064034	1249.8	0.0030363	1249.8	-0.00035602
1249.9	0.47725	1249.9	0.040495	1249.9	0.0064266	1249.9	0.0031945	1249.9	-0.00031356
1250	0.47901	1250	0.040463	1250	0.0064266	1250	0.0033156	1250	-0.00025751
1250.1	0.48067	1250.1	0.040451	1250.1	0.006425	1250.1	0.0034668	1250.1	-0.00018503
1250.2	0.48229	1250.2	0.040461	1250.2	0.0064194	1250.1	0.003597	1250.2	-0.00013233
1250.2	0.48395	1250.2	0.040502	1250.2	0.006427	1250.2	0.0037484	1250.2	-6.3867e-05
1250.3	0.48553	1250.3	0.040494	1250.3	0.0064344	1250.3	0.0038937	1250.3	-1.24e-05
1250.4	0.48706	1250.4	0.040495	1250.4	0.0064253	1250.4	0.004055	1250.4	4.2358e-05
1250.5	0.4887	1250.5	0.040507	1250.5	0.0064156	1250.5	0.0041837	1250.5	0.00010548
1250.5	0.49034	1250.5	0.040567	1250.5	0.0063987	1250.5	0.0043037	1250.5	0.00016047
1250.6	0.49185	1250.6	0.040578	1250.6	0.0064028	1250.6	0.0044128	1250.6	0.00021716
1250.7	0.49335	1250.7	0.040653	1250.7	0.0063952	1250.7	0.0045303	1250.7	0.00027734
1250.8	0.49497	1250.8	0.040732	1250.8	0.0063748	1250.8	0.0046258	1250.8	0.00032058
1250.8	0.49646	1250.8	0.040812	1250.8	0.0063633	1250.8	0.0047012	1250.8	0.0003706
1250.9	0.49799	1250.9	0.040898	1250.9	0.0063758	1250.9	0.004755	1250.9	0.00042464
1251	0.49974	1251	0.041051	1251	0.0063656	1251	0.0048105	1251	0.00046781
1251.1	0.5013	1251.1	0.041231	1251.1	0.0063812	1251.1	0.0048307	1251.1	0.00050945
1251.2	0.5028	1251.1	0.041405	1251.2	0.0063713	1251.1	0.0048562	1251.2	0.00055814
1251.2	0.50463	1251.2	0.041608	1251.2	0.0063829	1251.2	0.0048683	1251.2	0.00058682
1251.3	0.50629	1251.3	0.041822	1251.3	0.0064044	1251.3	0.004848	1251.3	0.00063907
1251.4	0.50776	1251.4	0.042046	1251.4	0.0064128	1251.4	0.0048124	1251.4	0.00067926
1251.5	0.50969	1251.5	0.042283	1251.5	0.0064323	1251.5	0.0047383	1251.5	0.00071342
1251.5	0.51145	1251.5	0.042585	1251.5	0.0064499	1251.5	0.0046534	1251.5	0.00075615
1251.6	0.513	1251.6	0.042867	1251.6	0.0064848	1251.6	0.0045732	1251.6	0.00078374
1251.7	0.51492	1251.7	0.043161	1251.7	0.0065002	1251.7	0.0044907	1251.7	0.00081391
1251.8	0.51684	1251.8	0.043498	1251.8	0.0065188	1251.8	0.0043773	1251.8	0.00085541
1251.8	0.51842	1251.8	0.043842	1251.8	0.0065554	1251.8	0.00425	1251.8	0.00087787
1251.9	0.52035	1251.9	0.04418	1251.9	0.0065714	1251.9	0.0041215	1251.9	0.00090542
1252	0.52234	1252	0.044553	1252	0.0066014	1252	0.0040031	1252	0.00093021
1252.1	0.52395	1252.1	0.044945	1252.1	0.0066245	1252.1	0.0038748	1252.1	0.00095652
1252.1	0.5259	1252.1	0.045306	1252.1	0.0066384	1252.1	0.0037157	1252.1	0.00097307
1252.2	0.52801	1252.2	0.045692	1252.2	0.0066636	1252.2	0.0036032	1252.2	0.0010145
1252.3	0.52965	1252.3	0.046041	1252.3	0.0066878	1252.3	0.0034834	1252.3	0.0010306
1252.4	0.53154	1252.4	0.046375	1252.4	0.0066987	1252.4	0.0033468	1252.4	0.0010603
1252.5	0.53367	1252.5	0.046762	1252.5	0.0067147	1252.5	0.0032243	1252.5	0.0010808
1252.5	0.53537	1252.5	0.047133	1252.5	0.0067202	1252.5	0.0031252	1252.5	0.0010914
1252.6	0.53727	1252.6	0.047408	1252.6	0.0067218	1252.6	0.0030117	1252.6	0.0011215
1252.7	0.53948	1252.7	0.047708	1252.7	0.0067378	1252.7	0.0029194	1252.7	0.0011368
1252.8	0.54126	1252.8	0.048011	1252.8	0.0067405	1252.8	0.0028575	1252.8	0.0011655
1252.8	0.54314	1252.8	0.048309	1252.8	0.0067467	1252.8	0.0028089	1252.8	0.0011709
1252.9	0.54532	1252.9	0.048586	1252.9	0.0067575	1252.9	0.0027664	1252.9	0.0011997
1253	0.54728	1253	0.048854	1253	0.0067728	1253	0.0027681	1253	0.0012228
1253.1	0.54914	1253.1	0.049109	1253.1	0.0067851	1253.1	0.0027634	1253.1	0.0012673
1253.1	0.55129	1253.1	0.049328	1253.1	0.0067847	1253.1	0.0027972	1253.1	0.0013153
1253.2	0.55326	1253.2	0.049549	1253.2	0.0067996	1253.2	0.0028383	1253.2	0.0013482
1253.3	0.55515	1253.3	0.04979	1253.3	0.0068085	1253.3	0.0028781	1253.3	0.0013922
1253.4	0.55734	1253.4	0.050049	1253.4	0.0068356	1253.4	0.0029622	1253.4	0.0014276
1253.5	0.55931	1253.5	0.050282	1253.5	0.0068496	1253.5	0.0030748	1253.5	0.0014737
1253.5	0.5612	1253.5	0.05054	1253.5	0.0068694	1253.5	0.0031804	1253.5	0.0015195
1253.6	0.56324	1253.6	0.050786	1253.6	0.0068943	1253.6	0.0033008	1253.6	0.0015762
1253.7	0.56524	1253.7	0.051032	1253.7	0.0069269	1253.7	0.0034177	1253.7	0.0016283
1253.8	0.5671	1253.8	0.05132	1253.8	0.0069481	1253.8	0.0035594	1253.8	0.0016782
1253.8	0.56908	1253.8	0.051653	1253.8	0.0069738	1253.8	0.0036933	1253.8	0.0017203
1253.9	0.57102	1253.9	0.051959	1253.9	0.0070061	1253.9	0.0038377	1253.9	0.0017635
1254	0.57287	1254	0.052257	1254	0.0070224	1254	0.0039754	1254	0.001789
1254.1	0.57468	1254.1	0.052627	1254.1	0.0070328	1254.1	0.0040884	1254.1	0.0018163
1254.2	0.57655	1254.1	0.053044	1254.2	0.0070537	1254.1	0.0041852	1254.1	0.0018333
1254.2	0.5784	1254.2	0.053415	1254.2	0.0070772	1254.2	0.0042878	1254.2	0.0018424
1254.3	0.58002	1254.3	0.053747	1254.3	0.0070891	1254.3	0.0043882	1254.3	0.0018509
1254.4	0.58175	1254.4	0.054133	1254.4	0.0070943	1254.4	0.0044733	1254.4	0.0018414
1254.5	0.58357	1254.5	0.054539	1254.5	0.0070846	1254.5	0.0045349	1254.5	0.0018207
1254.5	0.58521	1254.5	0.054999	1254.5	0.0070918	1254.5	0.0045819	1254.5	0.0018069
1254.6	0.58675	1254.6	0.055418	1254.6	0.0070845	1254.6	0.0046184	1254.6	0.0017693
1254.7	0.58853	1254.7	0.055868	1254.7	0.007047	1254.7	0.004629	1254.7	0.0017207
1254.8	0.59008	1254.8	0.056276	1254.8	0.0070257	1254.8	0.0046177	1254.8	0.0016655
1254.8	0.59153	1254.8	0.056655	1254.8	0.0069907	1254.8	0.0045924	1254.8	0.0016057
1254.9	0.59332	1254.9	0.057047	1254.9	0.0069593	1254.9	0.0045408	1254.9	0.001555
1255	0.59483	1255	0.057459	1255	0.0069271	1255	0.0044825	1255	0.0014926
1255.1	0.59623	1255.1	0.057837	1255.1	0.0068679	1255.1	0.0044144	1255.1	0.0014053
1255.2	0.59796	1255.1	0.058181	1255.2	0.0068107	1255.1	0.0043421	1255.2	0.0013286
1255.2	0.59954	1255.2	0.058608	1255.2	0.0067581	1255.2	0.0042945	1255.2	0.0012546
1255.3	0.60082	1255.3	0.058942	1255.3	0.0067014	1255.3	0.0042128	1255.3	0.0011632
1255.4	0.60252	1255.4	0.059331	1255.4	0.0066474	1255.4	0.0041219	1255.4	0.0010848
1255.5	0.60428	1255.5	0.059716	1255.5	0.0066014	1255.5	0.0040195	1255.5	0.0010119
1255.5	0.60555	1255.5	0.060081	1255.5	0.0065393	1255.5	0.0039306	1255.5	0.00092411
1255.6	0.60725	1255.6	0.06042	1255.6	0.0064883	1255.6	0.0038621	1255.6	0.00085919
1255.7	0.60898	1255.7	0.060841	1255.7	0.0064668	1255.7	0.0037775	1255.7	0.00078481
1255.8	0.61033	1255.8	0.061197	1255.8	0.0064192	1255.8	0.0037056	1255.8	0.00071504
1255.8	0.612	1255.8	0.061541	1255.8	0.0063795	1255.8	0.0036516	1255.8	0.00065097
1255.9	0.61393	1255.9	0.061918	1255.9	0.0063564	1255.9	0.0036039	1255.9	0.00057756
1256	0.61529	1256	0.062341	1256	0.0063376	1256	0.0035355	1256	0.00051241
1256.1	0.61698	1256.1	0.062767	1256.1	0.0063229	1256.1	0.0034691	1256.1	0.00045173
1256.2	0.61889	1256.2	0.063216	1256.2	0.0063037	1256.2	0.0034353	1256.2	0.00038134
1256.2	0.62032	1256.2	0.063659	1256.2	0.0062978	1256.2	0.0034023	1256.2	0.00031299
1256.3	0.62195	1256.3	0.064066	1256.3	0.0063067	1256.3	0.003369	1256.3	0.00025702
1256.4	0.62393	1256.4	0.064587	1256.4	0.0063091	1256.4	0.0033557	1256.4	0.00020057
1256.5	0.62543	1256.5	0.065104	1256.5	0.00632	1256.5	0.0033395	1256.5	0.00014678
1256.5	0.62698	1256.5	0.065594	1256.5	0.0063334	1256.5	0.0033294	1256.5	8.4092e-05
1256.6	0.62893	1256.6	0.066104	1256.6	0.0063535	1256.6	0.0033082	1256.6	5.6676e-05
1256.7	0.63049	1256.7	0.066641	1256.7	0.0063641	1256.7	0.003296	1256.7	1.1828e-05
1256.8	0.63192	1256.8	0.067171	1256.8	0.0063629	1256.8	0.003298	1256.8	-1.932e-05
1256.9	0.6338	1256.8	0.067739	1256.9	0.006385	1256.8	0.0032963	1256.9	-7.968e-05
1256.9	0.63546	1256.9	0.068314	1256.9	0.0064072	1256.9	0.0032931	1256.9	-0.0001242
1257	0.63686	1257	0.068904	1257	0.0064005	1257	0.0032955	1257	-0.00016228
1257.1	0.63866	1257.1	0.069473	1257.1	0.0064021	1257.1	0.0033361	1257.1	-0.00019395
1257.2	0.64024	1257.2	0.070039	1257.2	0.0063994	1257.2	0.0033446	1257.2	-0.00022676
1257.2	0.64165	1257.2	0.070642	1257.2	0.0063918	1257.2	0.0033694	1257.2	-0.00025095
1257.3	0.64336	1257.3	0.071229	1257.3	0.0063768	1257.3	0.0033876	1257.3	-0.00027629
1257.4	0.64501	1257.4	0.071856	1257.4	0.0063489	1257.4	0.0034022	1257.4	-0.00030218
1257.5	0.64647	1257.5	0.072477	1257.5	0.0063191	1257.5	0.0034221	1257.5	-0.00032548
1257.5	0.64801	1257.5	0.073132	1257.5	0.0062982	1257.5	0.0034514	1257.5	-0.00034485
1257.6	0.64961	1257.6	0.073762	1257.6	0.006259	1257.6	0.0034811	1257.6	-0.00037087
1257.7	0.65114	1257.7	0.074408	1257.7	0.0062204	1257.7	0.0035122	1257.7	-0.00038681
1257.8	0.65266	1257.8	0.075094	1257.8	0.0061745	1257.8	0.0035439	1257.8	-0.00040896
1257.9	0.65436	1257.9	0.075735	1257.9	0.006135	1257.9	0.0035918	1257.9	-0.00042664
1257.9	0.65595	1257.9	0.076408	1257.9	0.0060983	1257.9	0.0036563	1257.9	-0.00045219
1258	0.65749	1258	0.077106	1258	0.0060588	1258	0.003711	1258	-0.0004685
1258.1	0.65914	1258.1	0.077795	1258.1	0.0060185	1258.1	0.003764	1258.1	-0.00050008
1258.2	0.66088	1258.2	0.07855	1258.2	0.0059936	1258.2	0.0038097	1258.2	-0.00053079
1258.2	0.66242	1258.2	0.079267	1258.2	0.0059698	1258.2	0.0038696	1258.2	-0.00056614
1258.3	0.66406	1258.3	0.079946	1258.3	0.0059301	1258.3	0.0039166	1258.3	-0.00060456
1258.4	0.66593	1258.4	0.080649	1258.4	0.0058951	1258.4	0.003978	1258.4	-0.00062929
1258.5	0.66758	1258.5	0.081379	1258.5	0.0058751	1258.5	0.0040431	1258.5	-0.00065642
1258.6	0.66914	1258.6	0.082065	1258.6	0.0058616	1258.6	0.0041097	1258.6	-0.00068969
1258.6	0.67102	1258.6	0.082786	1258.6	0.0058465	1258.6	0.0041924	1258.6	-0.00071855
1258.7	0.67278	1258.7	0.08355	1258.7	0.0058496	1258.7	0.0042785	1258.7	-0.00075615
1258.8	0.67432	1258.8	0.084217	1258.8	0.005841	1258.8	0.0043445	1258.8	-0.00078194
1258.9	0.67624	1258.9	0.08494	1258.9	0.005847	1258.9	0.0044142	1258.9	-0.0008106
1258.9	0.67804	1258.9	0.085705	1258.9	0.0058512	1258.9	0.0044894	1258.9	-0.00083962
1259	0.67953	1259	0.086354	1259	0.0058617	1259	0.0045346	1259	-0.00086621
1259.1	0.68143	1259.1	0.086998	1259.1	0.0058636	1259.1	0.0046023	1259.1	-0.00087995
1259.2	0.68328	1259.2	0.087675	1259.2	0.0058669	1259.2	0.0046704	1259.2	-0.00090317
1259.3	0.68464	1259.3	0.088301	1259.3	0.0058836	1259.2	0.0047392	1259.3	-0.00090725
1259.3	0.68645	1259.3	0.088861	1259.3	0.0058946	1259.3	0.0047961	1259.3	-0.00092135
1259.4	0.68835	1259.4	0.089492	1259.4	0.0058975	1259.4	0.0048297	1259.4	-0.00093966
1259.5	0.68975	1259.5	0.090045	1259.5	0.0058928	1259.5	0.0048714	1259.5	-0.00094421
1259.6	0.69152	1259.6	0.090567	1259.6	0.0059066	1259.6	0.0048868	1259.6	-0.00094446
1259.6	0.6934	1259.6	0.091125	1259.6	0.0059144	1259.6	0.0048793	1259.6	-0.00094088
1259.7	0.69471	1259.7	0.091621	1259.7	0.0059212	1259.7	0.0048958	1259.7	-0.00091879
1259.8	0.69634	1259.8	0.092094	1259.8	0.0059214	1259.8	0.0048721	1259.8	-0.00092485
1259.9	0.69833	1259.9	0.092613	1259.9	0.0059297	1259.9	0.0048505	1259.9	-0.00091448
1260	0.69968	1260	0.093116	1260	0.005938	1259.9	0.00481	1260	-0.00090275
1260	0.70127	1260	0.093528	1260	0.0059488	1260	0.0047453	1260	-0.00088042
1260.1	0.70324	1260.1	0.094056	1260.1	0.0059597	1260.1	0.00466	1260.1	-0.000837
1260.2	0.70463	1260.2	0.094549	1260.2	0.0059856	1260.2	0.0045669	1260.2	-0.00079393
1260.3	0.70615	1260.3	0.095016	1260.3	0.0060042	1260.3	0.0044639	1260.3	-0.00075616
1260.3	0.70813	1260.3	0.095556	1260.3	0.0060369	1260.3	0.0043359	1260.3	-0.00070853
1260.4	0.7097	1260.4	0.096092	1260.4	0.0060697	1260.4	0.0042101	1260.4	-0.00067909
1260.5	0.71115	1260.5	0.09656	1260.5	0.0061088	1260.5	0.0040882	1260.5	-0.00064188
1260.6	0.71317	1260.6	0.097117	1260.6	0.0061662	1260.6	0.0039392	1260.6	-0.0006015
1260.7	0.71485	1260.7	0.0977	1260.7	0.0062007	1260.6	0.0038141	1260.7	-0.00053474
1260.7	0.71631	1260.7	0.098338	1260.7	0.0062587	1260.7	0.0036829	1260.7	-0.00046576
1260.8	0.7183	1260.8	0.098943	1260.8	0.0063244	1260.8	0.0035528	1260.8	-0.00039808
1260.9	0.72002	1260.9	0.099618	1260.9	0.0063822	1260.9	0.0034163	1260.9	-0.00034751
1261	0.72154	1261	0.10033	1261	0.0064334	1261	0.0032943	1261	-0.00027184
1261	0.72343	1261	0.10102	1261	0.0064986	1261	0.0031654	1261	-0.00019915
1261.1	0.72525	1261.1	0.10179	1261.1	0.0065509	1261.1	0.0030647	1261.1	-0.00012146
1261.2	0.72685	1261.2	0.1026	1261.2	0.0066211	1261.2	0.0029775	1261.2	-5.0931e-05
1261.3	0.72865	1261.3	0.10341	1261.3	0.0066713	1261.3	0.0029011	1261.3	1.7779e-05
1261.4	0.73053	1261.4	0.10422	1261.4	0.0067132	1261.4	0.0028243	1261.4	8.2454e-05
1261.4	0.73223	1261.4	0.10511	1261.4	0.0067453	1261.4	0.0027693	1261.4	0.00015153
1261.5	0.73392	1261.5	0.10599	1261.5	0.0067762	1261.5	0.0027545	1261.5	0.00021603
1261.6	0.73573	1261.6	0.10685	1261.6	0.0068181	1261.6	0.0027479	1261.6	0.00029058
1261.7	0.73735	1261.7	0.10772	1261.7	0.0068392	1261.7	0.0027479	1261.7	0.00035341
1261.7	0.739	1261.7	0.10866	1261.7	0.0068458	1261.7	0.0027473	1261.7	0.00043374
1261.8	0.74071	1261.8	0.10953	1261.8	0.0068508	1261.8	0.0027728	1261.8	0.00046948
1261.9	0.74239	1261.9	0.11048	1261.9	0.0068488	1261.9	0.0028105	1261.9	0.00051196
1262	0.74399	1262	0.11139	1262	0.0068154	1262	0.0028636	1262	0.00056756
1262.1	0.74555	1262.1	0.11226	1262.1	0.0067936	1262.1	0.0029156	1262.1	0.00062896
1262.1	0.74721	1262.1	0.11314	1262.1	0.0067727	1262.1	0.002989	1262.1	0.00066938
1262.2	0.74878	1262.2	0.11416	1262.2	0.0067474	1262.2	0.0030487	1262.2	0.000705
1262.3	0.75027	1262.3	0.11503	1262.3	0.006722	1262.3	0.0031263	1262.3	0.00074517
1262.4	0.75204	1262.4	0.11593	1262.4	0.0066779	1262.4	0.0031971	1262.4	0.00078164
1262.4	0.75362	1262.4	0.11689	1262.4	0.0066444	1262.4	0.0032581	1262.4	0.00082083
1262.5	0.75493	1262.5	0.11775	1262.5	0.0066	1262.5	0.0033271	1262.5	0.00084298
1262.6	0.75662	1262.6	0.11865	1262.6	0.0065816	1262.6	0.0033957	1262.6	0.0008689
1262.7	0.75818	1262.7	0.11959	1262.7	0.006549	1262.7	0.0034708	1262.7	0.00091025
1262.8	0.75945	1262.8	0.12051	1262.8	0.0065203	1262.8	0.0035398	1262.8	0.00092987
1262.8	0.76118	1262.8	0.12138	1262.8	0.0064928	1262.8	0.0036108	1262.8	0.00095859
1262.9	0.76281	1262.9	0.12237	1262.9	0.0064919	1262.9	0.0036729	1262.9	0.00097594
1263	0.76406	1263	0.12326	1263	0.0064835	1263	0.0037386	1263	0.00098506
1263.1	0.7657	1263.1	0.12416	1263.1	0.0064734	1263.1	0.0037922	1263.1	0.00099226
1263.2	0.76752	1263.1	0.12519	1263.2	0.0064736	1263.1	0.0038458	1263.2	0.0010082
1263.2	0.76878	1263.2	0.12617	1263.2	0.0064881	1263.2	0.0039169	1263.2	0.0010393
1263.3	0.77046	1263.3	0.12715	1263.3	0.0064869	1263.3	0.0039676	1263.3	0.0010585
1263.4	0.77245	1263.4	0.12824	1263.4	0.0065006	1263.4	0.0040235	1263.4	0.0010515
1263.5	0.77378	1263.5	0.1293	1263.5	0.0065067	1263.5	0.0040842	1263.5	0.0010359
1263.5	0.77544	1263.5	0.13039	1263.5	0.0065311	1263.5	0.0041163	1263.5	0.0010337
1263.6	0.77753	1263.6	0.13155	1263.6	0.0065431	1263.6	0.0041755	1263.6	0.0010437
1263.7	0.77897	1263.7	0.13268	1263.7	0.0065589	1263.7	0.0042214	1263.7	0.0010208
1263.8	0.7806	1263.8	0.13379	1263.8	0.0065886	1263.8	0.0042433	1263.8	0.0010218
1263.9	0.78284	1263.9	0.13504	1263.9	0.0065956	1263.9	0.0042749	1263.9	0.0010146
1263.9	0.78445	1263.9	0.13627	1263.9	0.0066076	1263.9	0.0043235	1263.9	0.00097417
1264	0.78616	1264	0.13748	1264	0.0066099	1264	0.0043487	1264	0.00093405
1264.1	0.78839	1264.1	0.13874	1264.1	0.0066079	1264.1	0.0043681	1264.1	0.00090979
1264.2	0.79014	1264.2	0.14005	1264.2	0.0066179	1264.2	0.0044111	1264.2	0.0008653
1264.2	0.79177	1264.2	0.1413	1264.2	0.0066129	1264.2	0.0044438	1264.2	0.00083585
1264.3	0.79402	1264.3	0.14264	1264.3	0.0066102	1264.3	0.0044523	1264.3	0.00081001
1264.4	0.79592	1264.4	0.14401	1264.4	0.006594	1264.4	0.0044483	1264.4	0.00076844
1264.5	0.79754	1264.5	0.14532	1264.5	0.0065849	1264.5	0.0044559	1264.5	0.00072561
1264.6	0.79975	1264.6	0.14663	1264.6	0.0065647	1264.6	0.0044527	1264.6	0.00067667
1264.6	0.80169	1264.6	0.14795	1264.6	0.0065448	1264.6	0.0044576	1264.6	0.00062325
1264.7	0.80338	1264.7	0.14931	1264.7	0.0065353	1264.7	0.004459	1264.7	0.0005908
1264.8	0.80546	1264.8	0.15056	1264.8	0.0065185	1264.8	0.0044536	1264.8	0.00055062
1264.9	0.80747	1264.9	0.15184	1264.9	0.0064943	1264.9	0.00445	1264.9	0.00049618
1265	0.80911	1264.9	0.1532	1265	0.0064775	1264.9	0.0044356	1265	0.00045028
1265	0.81105	1265	0.15447	1265	0.0064456	1265	0.0044265	1265	0.00041325
1265.1	0.81304	1265.1	0.15569	1265.1	0.0064082	1265.1	0.0044343	1265.1	0.00037156
1265.2	0.81465	1265.2	0.15698	1265.2	0.0063913	1265.2	0.0044534	1265.2	0.00034053
1265.3	0.81646	1265.3	0.15817	1265.3	0.0063749	1265.3	0.0044565	1265.3	0.00030449
1265.3	0.81834	1265.3	0.1594	1265.3	0.0063542	1265.3	0.0044432	1265.3	0.00027281
1265.4	0.82004	1265.4	0.16063	1265.4	0.0063298	1265.4	0.0044475	1265.4	0.00024044
1265.5	0.82168	1265.5	0.16187	1265.5	0.0063062	1265.5	0.0044537	1265.5	0.00020497
1265.6	0.82342	1265.6	0.16301	1265.6	0.006295	1265.6	0.0044596	1265.6	0.00016908
1265.7	0.82502	1265.7	0.16418	1265.7	0.0062819	1265.7	0.0044698	1265.7	0.00015579
1265.7	0.82659	1265.7	0.16542	1265.7	0.0062645	1265.7	0.004492	1265.7	0.00013988
1265.8	0.82815	1265.8	0.16654	1265.8	0.0062446	1265.8	0.0045193	1265.8	0.00012142
1265.9	0.82978	1265.9	0.16773	1265.9	0.0062328	1265.9	0.0045401	1265.9	7.968e-05
1266	0.83129	1266	0.16898	1266	0.0062208	1266	0.0045473	1266	6.1896e-05
1266.1	0.83267	1266	0.17007	1266.1	0.0062169	1266	0.0045731	1266	4.62e-05
1266.1	0.83425	1266.1	0.17125	1266.1	0.0062185	1266.1	0.0046088	1266.1	3.8029e-05
1266.2	0.83563	1266.2	0.17252	1266.2	0.0062415	1266.2	0.0046161	1266.2	3.1573e-05
1266.3	0.83689	1266.3	0.17368	1266.3	0.0062556	1266.3	0.0046386	1266.3	1.2243e-05
1266.4	0.83843	1266.4	0.17489	1266.4	0.0062701	1266.4	0.0046443	1266.4	2.5405e-06
1266.4	0.83987	1266.4	0.17622	1266.4	0.0062848	1266.4	0.0046594	1266.4	1.2412e-06
1266.5	0.84093	1266.5	0.17742	1266.5	0.0063148	1266.5	0.0046645	1266.5	-7.1304e-06
1266.6	0.84236	1266.6	0.17856	1266.6	0.0063593	1266.6	0.0046524	1266.6	-7.7785e-07
1266.7	0.84378	1266.7	0.17994	1266.7	0.0064017	1266.7	0.0046365	1266.7	8.6701e-07
1266.8	0.84472	1266.8	0.18118	1266.8	0.0064335	1266.8	0.0046236	1266.8	1.3593e-05
1266.8	0.84614	1266.8	0.18236	1266.8	0.0064699	1266.8	0.0045975	1266.8	3.8126e-05
1266.9	0.8477	1266.9	0.18378	1266.9	0.006526	1266.9	0.0045893	1266.9	5.7187e-05
1267	0.84863	1267	0.18503	1267	0.0065803	1267	0.0045833	1267	8.0316e-05
1267.1	0.8499	1267.1	0.18625	1267.1	0.0066365	1267.1	0.0045615	1267.1	0.00010153
1267.2	0.85152	1267.1	0.18759	1267.2	0.0067117	1267.1	0.0045212	1267.1	0.0001258
1267.2	0.85244	1267.2	0.18889	1267.2	0.0067753	1267.2	0.004478	1267.2	0.0001751
1267.3	0.85371	1267.3	0.19011	1267.3	0.006841	1267.3	0.0044301	1267.3	0.00021954
1267.4	0.85554	1267.4	0.19144	1267.4	0.0068915	1267.4	0.004393	1267.4	0.00024141
1267.5	0.85662	1267.5	0.19271	1267.5	0.0069484	1267.5	0.0043481	1267.5	0.00027432
1267.5	0.85781	1267.5	0.19397	1267.5	0.0070154	1267.5	0.0043146	1267.5	0.00032649
1267.6	0.85967	1267.6	0.19536	1267.6	0.0070631	1267.6	0.0042792	1267.6	0.00036108
1267.7	0.86088	1267.7	0.19671	1267.7	0.0071156	1267.7	0.0042418	1267.7	0.00039575
1267.8	0.8621	1267.8	0.19796	1267.8	0.0071542	1267.8	0.0041965	1267.8	0.00045758
1267.9	0.86406	1267.9	0.19927	1267.9	0.0071986	1267.9	0.0041794	1267.9	0.00050999
1267.9	0.86545	1267.9	0.20064	1267.9	0.0072424	1267.9	0.0041592	1267.9	0.00055127
1268	0.86671	1268	0.20194	1268	0.0072581	1268	0.0041262	1268	0.00060502
1268.1	0.86862	1268.1	0.20329	1268.1	0.0072711	1268.1	0.0041092	1268.1	0.00065105
1268.2	0.87014	1268.2	0.20471	1268.2	0.007287	1268.2	0.0041081	1268.2	0.00070914
1268.3	0.87142	1268.3	0.206	1268.3	0.0072959	1268.2	0.0041224	1268.3	0.00075576
1268.3	0.87329	1268.3	0.20739	1268.3	0.0072972	1268.3	0.0041211	1268.3	0.00080343
1268.4	0.87496	1268.4	0.20879	1268.4	0.0073019	1268.4	0.0041688	1268.4	0.00084926
1268.5	0.87619	1268.5	0.21016	1268.5	0.0073006	1268.5	0.0041779	1268.5	0.0009032
1268.6	0.87799	1268.6	0.2115	1268.6	0.0072967	1268.6	0.0042152	1268.6	0.00095933
1268.6	0.87969	1268.6	0.21295	1268.6	0.0072996	1268.6	0.0042672	1268.6	0.0010086
1268.7	0.88095	1268.7	0.2144	1268.7	0.0072997	1268.7	0.0043188	1268.7	0.0010605
1268.8	0.88263	1268.8	0.21572	1268.8	0.0072913	1268.8	0.004377	1268.8	0.0011151
1268.9	0.8843	1268.9	0.2171	1268.9	0.0072881	1268.9	0.0044327	1268.9	0.0011666
1269	0.88559	1269	0.21854	1269	0.007302	1269	0.0044711	1269	0.0012297
1269	0.88711	1269	0.2199	1269	0.0073026	1269	0.0045332	1269	0.0012782
1269.1	0.88867	1269.1	0.22123	1269.1	0.0073072	1269.1	0.0046057	1269.1	0.0013398
1269.2	0.88994	1269.2	0.2226	1269.2	0.00731	1269.2	0.0046604	1269.2	0.0013796
1269.3	0.89128	1269.3	0.22392	1269.3	0.0073226	1269.3	0.0047308	1269.3	0.0014378
1269.4	0.89275	1269.4	0.22516	1269.4	0.0073374	1269.4	0.0047886	1269.4	0.0015008
1269.4	0.8941	1269.4	0.22643	1269.4	0.0073504	1269.4	0.0048435	1269.4	0.001555
1269.5	0.89538	1269.5	0.22775	1269.5	0.0073603	1269.5	0.0049111	1269.5	0.0015915
1269.6	0.89671	1269.6	0.22885	1269.6	0.0073768	1269.6	0.0049367	1269.6	0.0016209
1269.7	0.89805	1269.7	0.23006	1269.7	0.0074038	1269.7	0.0049387	1269.7	0.0016518
1269.8	0.89929	1269.7	0.2313	1269.8	0.0074259	1269.7	0.0049538	1269.8	0.0016813
1269.8	0.90053	1269.8	0.23234	1269.8	0.0074647	1269.8	0.0049631	1269.8	0.0016997
1269.9	0.90188	1269.9	0.23339	1269.9	0.007498	1269.9	0.0049552	1269.9	0.0016989
1270	0.90309	1270	0.23454	1270	0.00753	1270	0.0049205	1270	0.0016974
1270.1	0.90419	1270.1	0.23546	1270.1	0.0075511	1270.1	0.0048987	1270.1	0.0016832
1270.1	0.90552	1270.1	0.23646	1270.1	0.007588	1270.1	0.0048405	1270.1	0.0016697
1270.2	0.90677	1270.2	0.23755	1270.2	0.007637	1270.2	0.0047899	1270.2	0.0016602
1270.3	0.90772	1270.3	0.23843	1270.3	0.0076675	1270.3	0.0047211	1270.3	0.0016241
1270.4	0.90907	1270.4	0.23932	1270.4	0.0077021	1270.4	0.0046515	1270.4	0.0015781
1270.5	0.91044	1270.5	0.2404	1270.5	0.0077268	1270.5	0.004584	1270.5	0.0015229
1270.5	0.91129	1270.5	0.24128	1270.5	0.0077681	1270.5	0.0045118	1270.5	0.0014614
1270.6	0.91254	1270.6	0.24219	1270.6	0.0078113	1270.6	0.0044266	1270.6	0.0014085
1270.7	0.91401	1270.7	0.24334	1270.7	0.0078671	1270.7	0.0043566	1270.7	0.0013398
1270.8	0.91479	1270.8	0.24429	1270.8	0.0079024	1270.8	0.0042847	1270.8	0.0012762
1270.9	0.91597	1270.9	0.24517	1270.9	0.0079479	1270.9	0.0041984	1270.9	0.0012083
1270.9	0.91751	1270.9	0.24638	1270.9	0.0080046	1270.9	0.0041208	1270.9	0.001144
1271	0.91827	1271	0.24742	1271	0.0080421	1271	0.0040519	1271	0.0010725
1271.1	0.91929	1271.1	0.24839	1271.1	0.0080778	1271.1	0.004013	1271.1	0.0010046
1271.2	0.92089	1271.2	0.24965	1271.2	0.0081273	1271.2	0.0039571	1271.2	0.000935
1271.3	0.92164	1271.3	0.25088	1271.3	0.0081698	1271.2	0.0039221	1271.3	0.00088543
1271.3	0.92251	1271.3	0.25208	1271.3	0.008234	1271.3	0.0038897	1271.3	0.00082783
1271.4	0.9242	1271.4	0.25339	1271.4	0.0082648	1271.4	0.003873	1271.4	0.00079319
1271.5	0.92511	1271.5	0.25478	1271.5	0.0083128	1271.5	0.0038648	1271.5	0.00075732
1271.6	0.92592	1271.6	0.25604	1271.6	0.0083431	1271.6	0.0038705	1271.6	0.00072943
1271.7	0.92743	1271.6	0.25754	1271.7	0.0083925	1271.6	0.0038971	1271.6	0.00070756
1271.7	0.92837	1271.7	0.2591	1271.7	0.008408	1271.7	0.0039036	1271.7	0.00068213
1271.8	0.9291	1271.8	0.26052	1271.8	0.0084267	1271.8	0.0039166	1271.8	0.00066113
1271.9	0.93058	1271.9	0.26207	1271.9	0.0084464	1271.9	0.0039591	1271.9	0.0006622
1272	0.93171	1272	0.26369	1272	0.0084762	1272	0.0040096	1272	0.00066937
1272	0.93241	1272	0.2652	1272	0.0084828	1272	0.0040693	1272	0.00065884
1272.1	0.9338	1272.1	0.26681	1272.1	0.0084925	1272.1	0.0041175	1272.1	0.00067994
1272.2	0.93494	1272.2	0.26846	1272.2	0.008501	1272.2	0.004179	1272.2	0.00069891
1272.3	0.9356	1272.3	0.27008	1272.3	0.0084969	1272.3	0.0042148	1272.3	0.00070526
1272.4	0.93692	1272.4	0.2717	1272.4	0.0085036	1272.4	0.0042746	1272.4	0.00073601
1272.4	0.93812	1272.4	0.2733	1272.4	0.008493	1272.4	0.00432	1272.4	0.00074432
1272.5	0.93879	1272.5	0.27487	1272.5	0.0084764	1272.5	0.0043782	1272.5	0.00074963
1272.6	0.94003	1272.6	0.27643	1272.6	0.008475	1272.6	0.0044154	1272.6	0.00076676
1272.7	0.94121	1272.7	0.27804	1272.7	0.0084677	1272.7	0.0044715	1272.7	0.00075567
1272.8	0.94187	1272.8	0.27956	1272.8	0.0084797	1272.8	0.0045172	1272.8	0.00076574
1272.8	0.94295	1272.8	0.28106	1272.8	0.0084685	1272.8	0.0045637	1272.8	0.00076655
1272.9	0.9441	1272.9	0.28253	1272.9	0.0084635	1272.9	0.0046075	1272.9	0.00075628
1273	0.94483	1273	0.28399	1273	0.008477	1273	0.0046381	1273	0.00073255
1273.1	0.9457	1273.1	0.2854	1273.1	0.0084978	1273.1	0.0046858	1273.1	0.00072407
1273.2	0.94682	1273.2	0.28675	1273.2	0.008498	1273.2	0.0047009	1273.2	0.00069904
1273.2	0.94764	1273.2	0.28815	1273.2	0.0085215	1273.2	0.00474	1273.2	0.00065486
1273.3	0.94839	1273.3	0.28956	1273.3	0.0085484	1273.3	0.0047621	1273.3	0.00059782
1273.4	0.94931	1273.4	0.2908	1273.4	0.008585	1273.4	0.004769	1273.4	0.00056036
1273.5	0.95016	1273.5	0.29215	1273.5	0.0086364	1273.5	0.0047903	1273.5	0.00051654
1273.6	0.95088	1273.6	0.29352	1273.6	0.0087006	1273.5	0.0048086	1273.6	0.0004525
1273.6	0.95162	1273.6	0.29473	1273.6	0.0087641	1273.6	0.004826	1273.6	0.00040103
1273.7	0.95242	1273.7	0.29599	1273.7	0.0088328	1273.7	0.004819	1273.7	0.00034092
1273.8	0.9531	1273.8	0.29745	1273.8	0.0089136	1273.8	0.0048187	1273.8	0.00028195
1273.9	0.95371	1273.9	0.29863	1273.9	0.0089791	1273.9	0.0048119	1273.9	0.00022426
1274	0.95448	1273.9	0.29997	1274	0.0090713	1273.9	0.0047979	1274	0.00016084
1274	0.95526	1274	0.3014	1274	0.0091518	1274	0.0047825	1274	0.00010232
1274.1	0.9557	1274.1	0.30263	1274.1	0.0092358	1274.1	0.0047572	1274.1	4.2015e-05
1274.2	0.95649	1274.2	0.30397	1274.2	0.0093264	1274.2	0.0047267	1274.2	-7.4253e-06
1274.3	0.95731	1274.3	0.30556	1274.3	0.0094263	1274.3	0.0046963	1274.3	-4.4445e-05
1274.4	0.95762	1274.3	0.30694	1274.4	0.0095316	1274.3	0.0046693	1274.3	-7.4453e-05
1274.4	0.95836	1274.4	0.30828	1274.4	0.0096197	1274.4	0.0046314	1274.4	-9.7142e-05
1274.5	0.95931	1274.5	0.30989	1274.5	0.0097246	1274.5	0.0046034	1274.5	-0.00012564
1274.6	0.95955	1274.6	0.31123	1274.6	0.0098111	1274.6	0.0045555	1274.6	-0.0001361
1274.7	0.96016	1274.7	0.31258	1274.7	0.0099098	1274.7	0.0044836	1274.7	-0.00014163
1274.7	0.96127	1274.7	0.31426	1274.7	0.0099981	1274.7	0.0044255	1274.7	-0.00014685
1274.8	0.96162	1274.8	0.31569	1274.8	0.010071	1274.8	0.0043534	1274.8	-0.00015517
1274.9	0.96228	1274.9	0.31709	1274.9	0.010154	1274.9	0.0043171	1274.9	-0.00013908
1275	0.96346	1275	0.31874	1275	0.010237	1275	0.0042508	1275	-0.00013163
1275.1	0.96394	1275.1	0.32028	1275.1	0.0103	1275.1	0.0042019	1275.1	-9.4801e-05
1275.1	0.96451	1275.1	0.32162	1275.1	0.010382	1275.1	0.0041463	1275.1	-7.1811e-05
1275.2	0.96583	1275.2	0.32317	1275.2	0.010436	1275.2	0.004093	1275.2	-2.5287e-05
1275.3	0.96648	1275.3	0.32472	1275.3	0.010484	1275.3	0.0040386	1275.3	1.4232e-06
1275.4	0.96701	1275.4	0.32604	1275.4	0.010518	1275.4	0.0039965	1275.4	3.565e-05
1275.5	0.96843	1275.5	0.32756	1275.5	0.010581	1275.5	0.0039428	1275.5	9.7404e-05
1275.5	0.96926	1275.5	0.32908	1275.5	0.010601	1275.5	0.0038803	1275.5	0.0001346
1275.6	0.96987	1275.6	0.33036	1275.6	0.010654	1275.6	0.0038554	1275.6	0.00019071
1275.7	0.97132	1275.7	0.33183	1275.7	0.010683	1275.7	0.0038376	1275.7	0.00026638
1275.8	0.97237	1275.8	0.33332	1275.8	0.010713	1275.8	0.0038059	1275.8	0.0003246
1275.9	0.97294	1275.9	0.33465	1275.9	0.010722	1275.9	0.0037546	1275.9	0.00037268
1275.9	0.97448	1275.9	0.33608	1275.9	0.010757	1275.9	0.00371	1275.9	0.00045142
1276	0.9757	1276	0.33749	1276	0.010785	1276	0.0036873	1276	0.00051775
1276.1	0.97631	1276.1	0.33884	1276.1	0.010805	1276.1	0.0036644	1276.1	0.00057936
1276.2	0.97776	1276.2	0.34017	1276.2	0.010828	1276.2	0.0036466	1276.2	0.00067379
1276.3	0.97905	1276.3	0.3416	1276.3	0.010856	1276.3	0.0036317	1276.3	0.00073218
1276.3	0.97973	1276.3	0.34301	1276.3	0.010876	1276.3	0.0036055	1276.3	0.00083967
1276.4	0.98104	1276.4	0.34443	1276.4	0.010913	1276.4	0.0035681	1276.4	0.00092989
1276.5	0.98238	1276.5	0.34589	1276.5	0.010929	1276.5	0.0035483	1276.5	0.0010124
1276.6	0.98306	1276.6	0.34728	1276.6	0.010965	1276.6	0.003513	1276.6	0.0011331
1276.7	0.9842	1276.7	0.34873	1276.7	0.010977	1276.7	0.0034912	1276.7	0.0012179
1276.7	0.98546	1276.7	0.35019	1276.7	0.01102	1276.7	0.0034758	1276.7	0.0013045
1276.8	0.98613	1276.8	0.35167	1276.8	0.011063	1276.8	0.0034292	1276.8	0.0014125
1276.9	0.98706	1276.9	0.35314	1276.9	0.011097	1276.9	0.0034148	1276.9	0.0015043
1277	0.98814	1277	0.35458	1277	0.011138	1277	0.0033901	1277	0.0015737
1277.1	0.9888	1277.1	0.35614	1277.1	0.011198	1277.1	0.0033731	1277.1	0.0016471
1277.1	0.98944	1277.1	0.35766	1277.1	0.011237	1277.1	0.0033503	1277.1	0.0017268
1277.2	0.9903	1277.2	0.35903	1277.2	0.011284	1277.2	0.0033512	1277.2	0.0017976
1277.3	0.99091	1277.3	0.36057	1277.3	0.011323	1277.3	0.0033482	1277.3	0.0018443
1277.4	0.9914	1277.4	0.36211	1277.4	0.011362	1277.4	0.0033453	1277.4	0.001869
1277.5	0.99194	1277.5	0.36346	1277.5	0.011404	1277.5	0.0033571	1277.5	0.0018941
1277.5	0.99252	1277.5	0.36492	1277.5	0.011445	1277.5	0.0033515	1277.5	0.0019016
1277.6	0.99294	1277.6	0.36651	1277.6	0.011473	1277.6	0.0033816	1277.6	0.0019103
1277.7	0.99317	1277.7	0.36784	1277.7	0.011498	1277.7	0.0034029	1277.7	0.0018961
1277.8	0.99366	1277.8	0.36926	1277.8	0.011527	1277.8	0.0034428	1277.8	0.0018533
1277.9	0.99401	1277.9	0.37082	1277.9	0.01155	1277.9	0.0034971	1277.9	0.0018292
1277.9	0.99404	1277.9	0.37215	1277.9	0.011565	1277.9	0.0035367	1277.9	0.0017724
1278	0.99437	1278	0.37346	1278	0.011599	1278	0.0035892	1278	0.001711
1278.1	0.99473	1278.1	0.37504	1278.1	0.011644	1278.1	0.003649	1278.1	0.0016352
1278.2	0.99462	1278.2	0.37634	1278.2	0.011663	1278.2	0.0037142	1278.2	0.0015641
1278.3	0.99484	1278.3	0.37758	1278.3	0.011686	1278.3	0.0037495	1278.3	0.0014783
1278.3	0.99527	1278.3	0.37916	1278.3	0.011731	1278.3	0.0038137	1278.3	0.0013975
1278.4	0.99512	1278.4	0.38055	1278.4	0.011754	1278.4	0.0038682	1278.4	0.0013179
1278.5	0.99527	1278.5	0.3818	1278.5	0.0118	1278.5	0.0039213	1278.5	0.0012434
1278.6	0.99582	1278.6	0.38339	1278.6	0.011854	1278.6	0.003983	1278.6	0.0011664
1278.7	0.99564	1278.7	0.38484	1278.7	0.011916	1278.7	0.0040138	1278.7	0.0011032
1278.7	0.99563	1278.7	0.3861	1278.7	0.011997	1278.7	0.0040583	1278.7	0.0010557
1278.8	0.99625	1278.8	0.38767	1278.8	0.012091	1278.8	0.0040888	1278.8	0.0010082
1278.9	0.99615	1278.9	0.38923	1278.9	0.012197	1278.9	0.0041205	1278.9	0.00098594
1279	0.9961	1279	0.39058	1279	0.012307	1279	0.0041398	1279	0.00096144
1279.1	0.9968	1279.1	0.39222	1279.1	0.012429	1279.1	0.0041581	1279.1	0.00095427
1279.1	0.99675	1279.1	0.3939	1279.1	0.012576	1279.1	0.0041609	1279.1	0.00094616
1279.2	0.99655	1279.2	0.39531	1279.2	0.012743	1279.2	0.0041545	1279.2	0.0009614
1279.3	0.99726	1279.3	0.39697	1279.3	0.012939	1279.3	0.0041314	1279.3	0.0010006
1279.4	0.99733	1279.4	0.39867	1279.4	0.01313	1279.4	0.0041272	1279.4	0.0010241
1279.5	0.99709	1279.5	0.40018	1279.5	0.013326	1279.5	0.0041162	1279.5	0.0010732
1279.5	0.99779	1279.5	0.40186	1279.5	0.013538	1279.5	0.004071	1279.5	0.0011283
1279.6	0.99798	1279.6	0.4036	1279.6	0.013775	1279.6	0.0040362	1279.6	0.0011664
1279.7	0.99762	1279.7	0.40509	1279.7	0.014022	1279.7	0.0039798	1279.7	0.0012206
1279.8	0.99822	1279.8	0.40674	1279.8	0.014279	1279.8	0.0039491	1279.8	0.0012696
1279.9	0.99848	1279.9	0.40844	1279.9	0.014515	1279.9	0.0039163	1279.9	0.0013171
1279.9	0.99808	1279.9	0.41002	1279.9	0.014757	1279.9	0.0038902	1279.9	0.0013611
1280	0.99858	1280	0.41157	1280	0.015007	1280	0.0038513	1280	0.0013972
1280.1	0.99894	1280.1	0.41327	1280.1	0.01527	1280.1	0.0037811	1280.1	0.0014313
1280.2	0.9986	1280.2	0.41482	1280.2	0.015508	1280.2	0.0037579	1280.2	0.0014562
1280.3	0.9989	1280.3	0.4163	1280.3	0.015754	1280.3	0.0037304	1280.3	0.0014473
1280.3	0.99932	1280.3	0.41787	1280.3	0.015998	1280.3	0.0037044	1280.3	0.0014454
1280.4	0.99898	1280.4	0.41934	1280.4	0.016223	1280.4	0.0036992	1280.4	0.0014498
1280.5	0.99918	1280.5	0.42079	1280.5	0.01645	1280.5	0.0036904	1280.5	0.0014201
1280.6	0.99961	1280.6	0.42228	1280.6	0.016675	1280.6	0.0036932	1280.6	0.0014003
1280.7	0.99938	1280.7	0.42369	1280.7	0.016882	1280.7	0.0036925	1280.7	0.0013832
1280.7	0.99942	1280.7	0.42504	1280.7	0.017073	1280.7	0.0036953	1280.7	0.0013416
1280.8	0.99974	1280.8	0.42644	1280.8	0.017254	1280.8	0.003697	1280.8	0.0012992
1280.9	0.99961	1280.9	0.42785	1280.9	0.017425	1280.9	0.0037276	1280.9	0.0012684
1281	0.99965	1281	0.42923	1281	0.017572	1281	0.0037589	1281	0.0012191
1281.1	0.99988	1281.1	0.43047	1281.1	0.017716	1281.1	0.003787	1281.1	0.0011683
1281.1	0.99985	1281.1	0.43186	1281.1	0.017845	1281.1	0.0038077	1281.1	0.0011077
1281.2	0.99983	1281.2	0.43328	1281.2	0.01798	1281.2	0.0038317	1281.2	0.0010671
1281.3	0.99993	1281.3	0.4345	1281.3	0.01809	1281.3	0.0038714	1281.3	0.0010402
1281.4	0.99996	1281.4	0.4358	1281.4	0.018184	1281.4	0.0038998	1281.4	0.0010167
1281.5	0.99998	1281.5	0.4373	1281.5	0.01828	1281.5	0.0039429	1281.5	0.00099252
1281.6	0.99994	1281.5	0.4385	1281.6	0.018375	1281.5	0.0039875	1281.5	0.00095049
1281.6	1	1281.6	0.43979	1281.6	0.018465	1281.6	0.0040072	1281.6	0.0009312
1281.7	0.99997	1281.7	0.44129	1281.7	0.018568	1281.7	0.0040192	1281.7	0.00092954
1281.8	0.99978	1281.8	0.44255	1281.8	0.018657	1281.8	0.0040234	1281.8	0.0009178
1281.9	0.99982	1281.9	0.44379	1281.9	0.018752	1281.9	0.0040436	1281.9	0.00091567
1282	0.9999	1281.9	0.44544	1282	0.018826	1281.9	0.0040545	1282	0.00092658
1282	0.99965	1282	0.44675	1282	0.018906	1282	0.0040626	1282	0.00093282
1282.1	0.99957	1282.1	0.448	1282.1	0.019014	1282.1	0.0040414	1282.1	0.00092938
1282.2	0.99971	1282.2	0.44964	1282.2	0.019122	1282.2	0.0040477	1282.2	0.00095301
1282.3	0.99927	1282.3	0.45103	1282.3	0.019228	1282.3	0.0040331	1282.3	0.00097292
1282.4	0.99915	1282.4	0.45225	1282.4	0.019364	1282.3	0.0040094	1282.4	0.00098668
1282.4	0.99937	1282.4	0.45395	1282.4	0.019505	1282.4	0.0039973	1282.4	0.0010057
1282.5	0.99893	1282.5	0.45543	1282.5	0.019633	1282.5	0.0039723	1282.5	0.0010244
1282.6	0.99865	1282.6	0.45672	1282.6	0.019794	1282.6	0.0039638	1282.6	0.001052
1282.7	0.99894	1282.7	0.4584	1282.7	0.019972	1282.7	0.0039547	1282.7	0.0010672
1282.8	0.99848	1282.8	0.45999	1282.8	0.020141	1282.8	0.0039421	1282.8	0.0011072
1282.8	0.99803	1282.8	0.46125	1282.8	0.020326	1282.8	0.0039265	1282.8	0.001124
1282.9	0.99843	1282.9	0.46291	1282.9	0.020563	1282.9	0.0039251	1282.9	0.0011581
1283	0.99802	1283	0.46457	1283	0.020774	1283	0.0039391	1283	0.0011964
1283.1	0.99759	1283.1	0.46587	1283.1	0.020969	1283.1	0.0039466	1283.1	0.0012243
1283.2	0.99796	1283.2	0.46756	1283.2	0.021221	1283.2	0.0039375	1283.2	0.0012634
1283.2	0.9977	1283.2	0.46929	1283.2	0.021449	1283.2	0.0039714	1283.2	0.0012921
1283.3	0.99706	1283.3	0.47065	1283.3	0.02167	1283.3	0.0039994	1283.3	0.0013393
1283.4	0.99739	1283.4	0.47226	1283.4	0.021932	1283.4	0.0040134	1283.4	0.0013778
1283.5	0.99731	1283.5	0.47403	1283.5	0.022179	1283.5	0.0040643	1283.5	0.0014143
1283.6	0.99661	1283.6	0.47553	1283.6	0.022413	1283.6	0.0041056	1283.6	0.0014684
1283.6	0.99699	1283.6	0.47721	1283.6	0.022659	1283.6	0.004172	1283.6	0.0015274
1283.7	0.99704	1283.7	0.47901	1283.7	0.022918	1283.7	0.0042246	1283.7	0.0015892
1283.8	0.99637	1283.8	0.48062	1283.8	0.023152	1283.8	0.0042801	1283.8	0.0016339
1283.9	0.99663	1283.9	0.48225	1283.9	0.023426	1283.9	0.004326	1283.9	0.0016822
1284	0.99682	1284	0.48415	1284	0.023685	1284	0.0043684	1284	0.0017468
1284.1	0.99625	1284	0.48583	1284.1	0.023936	1284	0.0044412	1284	0.0017813
1284.1	0.99639	1284.1	0.48753	1284.1	0.024191	1284.1	0.0044833	1284.1	0.0018351
1284.2	0.99675	1284.2	0.48945	1284.2	0.02447	1284.2	0.0045186	1284.2	0.001881
1284.3	0.99619	1284.3	0.49132	1284.3	0.02472	1284.3	0.0045588	1284.3	0.0019298
1284.4	0.99628	1284.4	0.49311	1284.4	0.024994	1284.4	0.0045918	1284.4	0.001966
1284.5	0.99652	1284.5	0.49507	1284.5	0.025279	1284.4	0.0046339	1284.5	0.0019903
1284.5	0.99612	1284.5	0.49703	1284.5	0.02559	1284.5	0.0046518	1284.5	0.0020166
1284.6	0.99605	1284.6	0.49899	1284.6	0.025885	1284.6	0.0046769	1284.6	0.0020143
1284.7	0.99631	1284.7	0.50101	1284.7	0.026206	1284.7	0.0047133	1284.7	0.0020033
1284.8	0.99601	1284.8	0.50306	1284.8	0.026548	1284.8	0.0047325	1284.8	0.0019933
1284.9	0.99584	1284.9	0.50517	1284.9	0.026884	1284.9	0.0047435	1284.9	0.00196
1284.9	0.99594	1284.9	0.50713	1284.9	0.027252	1284.9	0.0047468	1284.9	0.0019366
1285	0.99567	1285	0.50926	1285	0.027631	1285	0.0047519	1285	0.0018899
1285.1	0.99549	1285.1	0.51145	1285.1	0.028034	1285.1	0.0047731	1285.1	0.0018562
1285.2	0.99544	1285.2	0.51345	1285.2	0.028415	1285.2	0.0047904	1285.2	0.0017856
1285.3	0.9952	1285.3	0.51558	1285.3	0.028837	1285.3	0.0047959	1285.3	0.0017292
1285.3	0.99488	1285.3	0.51787	1285.3	0.02927	1285.3	0.004802	1285.3	0.0016492
1285.4	0.99456	1285.4	0.51983	1285.4	0.029705	1285.4	0.0048145	1285.4	0.0015624
1285.5	0.99426	1285.5	0.52187	1285.5	0.030172	1285.5	0.004807	1285.5	0.0014893
1285.6	0.99395	1285.6	0.52411	1285.6	0.030624	1285.6	0.0048263	1285.6	0.001409
1285.7	0.99355	1285.7	0.52605	1285.7	0.031079	1285.7	0.0048324	1285.7	0.0013169
1285.7	0.99319	1285.7	0.52797	1285.7	0.03153	1285.7	0.0048475	1285.7	0.0012182
1285.8	0.99277	1285.8	0.53017	1285.8	0.032014	1285.8	0.0048467	1285.8	0.0011367
1285.9	0.99207	1285.9	0.53197	1285.9	0.032482	1285.9	0.0048657	1285.9	0.0010642
1286	0.99155	1286	0.5337	1286	0.032953	1286	0.0048751	1286	0.00097416
1286.1	0.99117	1286.1	0.53583	1286.1	0.033413	1286.1	0.0048913	1286.1	0.00091832
1286.2	0.99034	1286.2	0.53758	1286.2	0.033869	1286.1	0.0048715	1286.2	0.0008667
1286.2	0.98969	1286.2	0.5391	1286.2	0.03431	1286.2	0.004863	1286.2	0.00081361
1286.3	0.98929	1286.3	0.54106	1286.3	0.034766	1286.3	0.004866	1286.3	0.00078794
1286.4	0.98826	1286.4	0.54273	1286.4	0.035209	1286.4	0.0048543	1286.4	0.00077813
1286.5	0.9873	1286.5	0.54408	1286.5	0.035627	1286.5	0.0048301	1286.5	0.00078355
1286.6	0.98696	1286.6	0.5458	1286.6	0.036086	1286.6	0.004796	1286.6	0.0007975
1286.6	0.9859	1286.6	0.54742	1286.6	0.036483	1286.6	0.0047658	1286.6	0.00082757
1286.7	0.98484	1286.7	0.54868	1286.7	0.036891	1286.7	0.0047133	1286.7	0.00086366
1286.8	0.98446	1286.8	0.55032	1286.8	0.037308	1286.8	0.0046378	1286.8	0.00091169
1286.9	0.98334	1286.9	0.55186	1286.9	0.037707	1286.9	0.0045781	1286.9	0.00097603
1287	0.982	1287	0.553	1287	0.038095	1287	0.0044789	1287	0.0010355
1287	0.98154	1287	0.55451	1287	0.038541	1287	0.0043981	1287	0.0011118
1287.1	0.98052	1287.1	0.55612	1287.1	0.038953	1287.1	0.0043217	1287.1	0.0011893
1287.2	0.97912	1287.2	0.55726	1287.2	0.039346	1287.2	0.004216	1287.2	0.0012676
1287.3	0.97863	1287.3	0.55873	1287.3	0.039803	1287.3	0.0041012	1287.3	0.0013601
1287.4	0.97766	1287.4	0.56037	1287.4	0.040259	1287.4	0.0039898	1287.4	0.0014352
1287.5	0.97612	1287.4	0.56161	1287.5	0.040684	1287.4	0.0038734	1287.4	0.0015182
1287.5	0.97555	1287.5	0.56301	1287.5	0.041155	1287.5	0.0037479	1287.5	0.0015848
1287.6	0.9747	1287.6	0.56469	1287.6	0.041642	1287.6	0.0036302	1287.6	0.0016237
1287.7	0.97312	1287.7	0.5661	1287.7	0.042122	1287.7	0.0035049	1287.7	0.0016702
1287.8	0.97251	1287.8	0.56759	1287.8	0.042656	1287.8	0.0033723	1287.8	0.0017107
1287.9	0.97173	1287.9	0.56938	1287.9	0.043199	1287.9	0.0032543	1287.9	0.0017351
1287.9	0.97022	1287.9	0.57087	1287.9	0.043735	1287.9	0.0031526	1287.9	0.0017341
1288	0.96941	1288	0.57242	1288	0.044288	1288	0.0030423	1288	0.0017459
1288.1	0.96872	1288.1	0.57424	1288.1	0.044888	1288.1	0.0029516	1288.1	0.001715
1288.2	0.96724	1288.2	0.57593	1288.2	0.045477	1288.2	0.0028747	1288.2	0.0016889
1288.3	0.96637	1288.3	0.57764	1288.3	0.046078	1288.3	0.0027948	1288.3	0.0016293
1288.3	0.96574	1288.3	0.57951	1288.3	0.046704	1288.3	0.0027113	1288.3	0.0015671
1288.4	0.96439	1288.4	0.58136	1288.4	0.047311	1288.4	0.002652	1288.4	0.00152
1288.5	0.96339	1288.5	0.58314	1288.5	0.047904	1288.5	0.0025935	1288.5	0.0014291
1288.6	0.96268	1288.6	0.58505	1288.6	0.048554	1288.6	0.0025608	1288.6	0.0013393
1288.7	0.96146	1288.7	0.58702	1288.7	0.049172	1288.7	0.0025273	1288.7	0.0012616
1288.8	0.96036	1288.7	0.589	1288.8	0.049788	1288.7	0.0025203	1288.8	0.0011775
1288.8	0.95966	1288.8	0.59087	1288.8	0.050414	1288.8	0.0025254	1288.8	0.0011049
1288.9	0.95839	1288.9	0.59287	1288.9	0.051024	1288.9	0.0025353	1288.9	0.001019
1289	0.95731	1289	0.59498	1289	0.051609	1289	0.0025617	1289	0.00095959
1289.1	0.95637	1289.1	0.59687	1289.1	0.052178	1289.1	0.0025702	1289.1	0.0008774
1289.2	0.95517	1289.2	0.59891	1289.2	0.052766	1289.2	0.0025949	1289.2	0.0008231
1289.2	0.95405	1289.2	0.60104	1289.2	0.053325	1289.2	0.0026313	1289.2	0.00076767
1289.3	0.95301	1289.3	0.60297	1289.3	0.053858	1289.3	0.002678	1289.3	0.00073815
1289.4	0.95192	1289.4	0.60497	1289.4	0.054405	1289.4	0.0027315	1289.4	0.00070186
1289.5	0.95074	1289.5	0.60717	1289.5	0.05492	1289.5	0.0027802	1289.5	0.00066258
1289.6	0.94952	1289.6	0.60908	1289.6	0.055446	1289.6	0.0028224	1289.6	0.00064228
1289.6	0.94826	1289.6	0.61098	1289.6	0.055962	1289.6	0.0028745	1289.6	0.00065201
1289.7	0.94707	1289.7	0.61319	1289.7	0.056486	1289.7	0.0029382	1289.7	0.00065996
1289.8	0.9458	1289.8	0.61509	1289.8	0.056988	1289.8	0.0030078	1289.8	0.00067678
1289.9	0.94455	1289.9	0.6169	1289.9	0.057508	1289.9	0.0030596	1289.9	0.00067722
1290	0.94339	1290	0.61906	1290	0.058045	1290	0.0031076	1290	0.00070825
1290.1	0.94186	1290.1	0.62092	1290.1	0.058549	1290	0.0031589	1290.1	0.00072491
1290.1	0.94055	1290.1	0.6226	1290.1	0.059076	1290.1	0.0032232	1290.1	0.00073808
1290.2	0.9394	1290.2	0.62478	1290.2	0.059676	1290.2	0.0032668	1290.2	0.00076957
1290.3	0.9378	1290.3	0.6267	1290.3	0.060239	1290.3	0.003318	1290.3	0.00079037
1290.4	0.93626	1290.4	0.62828	1290.4	0.060811	1290.4	0.0033443	1290.4	0.00080384
1290.5	0.93523	1290.5	0.63037	1290.5	0.061471	1290.5	0.0033785	1290.5	0.00082058
1290.5	0.93349	1290.5	0.63232	1290.5	0.062077	1290.5	0.003426	1290.5	0.00084104
1290.6	0.93176	1290.6	0.63386	1290.6	0.062713	1290.6	0.0034609	1290.6	0.00085089
1290.7	0.93069	1290.7	0.63584	1290.7	0.063422	1290.7	0.0034889	1290.7	0.00083113
1290.8	0.92896	1290.8	0.63784	1290.8	0.064101	1290.8	0.0035228	1290.8	0.00083385
1290.9	0.92704	1290.9	0.63936	1290.9	0.064788	1290.9	0.0035352	1290.9	0.00084026
1291	0.92592	1290.9	0.64132	1291	0.065536	1290.9	0.0035322	1291	0.00084353
1291	0.92421	1291	0.64343	1291	0.066285	1291	0.0035362	1291	0.00083569
1291.1	0.92206	1291.1	0.64491	1291.1	0.066983	1291.1	0.0035441	1291.1	0.00082485
1291.2	0.92077	1291.2	0.64679	1291.2	0.067765	1291.2	0.0035512	1291.2	0.00080902
1291.3	0.91912	1291.3	0.64887	1291.3	0.068545	1291.3	0.0035568	1291.3	0.00076574
1291.4	0.91686	1291.4	0.65049	1291.4	0.069262	1291.4	0.0035552	1291.4	0.00075183
1291.4	0.91551	1291.4	0.65232	1291.4	0.070079	1291.4	0.0035424	1291.4	0.00072115
1291.5	0.91382	1291.5	0.65445	1291.5	0.070891	1291.5	0.0035478	1291.5	0.00070224
1291.6	0.91148	1291.6	0.6561	1291.6	0.071636	1291.6	0.0035405	1291.6	0.000682
1291.7	0.90989	1291.7	0.65785	1291.7	0.072428	1291.7	0.0035523	1291.7	0.00066006
1291.8	0.90824	1291.8	0.65988	1291.8	0.073263	1291.8	0.0035563	1291.8	0.00063032
1291.9	0.90586	1291.8	0.66161	1291.9	0.073995	1291.8	0.0035599	1291.8	0.0006151
1291.9	0.90413	1291.9	0.66339	1291.9	0.074775	1291.9	0.0035792	1291.9	0.00060447
1292	0.90253	1292	0.66538	1292	0.075606	1292	0.0035984	1292	0.00058429
1292.1	0.90013	1292.1	0.66723	1292.1	0.076354	1292.1	0.0036031	1292.1	0.00059681
1292.2	0.89828	1292.2	0.66898	1292.2	0.077117	1292.2	0.0036228	1292.2	0.00058262
1292.3	0.89664	1292.3	0.67084	1292.3	0.077936	1292.3	0.0036746	1292.3	0.00059181
1292.3	0.8943	1292.3	0.6727	1292.3	0.078719	1292.3	0.0037367	1292.3	0.00059692
1292.4	0.89235	1292.4	0.67447	1292.4	0.079495	1292.4	0.0037787	1292.4	0.00057098
1292.5	0.89074	1292.5	0.67633	1292.5	0.080333	1292.5	0.0038614	1292.5	0.00058111
1292.6	0.88848	1292.6	0.67819	1292.6	0.081127	1292.6	0.0039232	1292.6	0.00060888
1292.7	0.88647	1292.7	0.68	1292.7	0.081922	1292.7	0.0040144	1292.7	0.00062398
1292.8	0.88481	1292.7	0.68178	1292.8	0.082739	1292.7	0.0040859	1292.7	0.00063786
1292.8	0.88266	1292.8	0.68363	1292.8	0.083551	1292.8	0.0041603	1292.8	0.00066391
1292.9	0.88065	1292.9	0.68556	1292.9	0.084376	1292.9	0.0042591	1292.9	0.00068041
1293	0.87892	1293	0.68735	1293	0.08523	1293	0.0043404	1293	0.00069896
1293.1	0.87687	1293.1	0.68919	1293.1	0.086094	1293.1	0.0044457	1293.1	0.00074392
1293.2	0.87482	1293.2	0.69115	1293.2	0.086927	1293.2	0.0045459	1293.2	0.00078034
1293.2	0.87296	1293.2	0.6929	1293.2	0.087782	1293.2	0.0046494	1293.2	0.00080511
1293.3	0.87099	1293.3	0.69471	1293.3	0.088676	1293.3	0.0047435	1293.3	0.00083009
1293.4	0.86892	1293.4	0.6967	1293.4	0.089532	1293.4	0.0048174	1293.4	0.00086575
1293.5	0.86694	1293.5	0.69846	1293.5	0.090384	1293.5	0.0049148	1293.5	0.00089669
1293.6	0.865	1293.6	0.70013	1293.6	0.091259	1293.6	0.0049958	1293.6	0.00092693
1293.7	0.86302	1293.6	0.70222	1293.7	0.092158	1293.6	0.0050932	1293.7	0.00093738
1293.7	0.86093	1293.7	0.70396	1293.7	0.093014	1293.7	0.0051511	1293.7	0.00096471
1293.8	0.85884	1293.8	0.7056	1293.8	0.093894	1293.8	0.0052042	1293.8	0.00098493
1293.9	0.85682	1293.9	0.70769	1293.9	0.094787	1293.9	0.0052454	1293.9	0.00098844
1294	0.85454	1294	0.70946	1294	0.095633	1294	0.0052976	1294	0.00099833
1294.1	0.85234	1294.1	0.71103	1294.1	0.09652	1294.1	0.005327	1294.1	0.00099838
1294.1	0.8503	1294.1	0.71306	1294.1	0.097464	1294.1	0.0053663	1294.1	0.0010105
1294.2	0.84784	1294.2	0.71487	1294.2	0.09831	1294.2	0.0053894	1294.2	0.001009
1294.3	0.84542	1294.3	0.71632	1294.3	0.099184	1294.3	0.0053888	1294.3	0.0010019
1294.4	0.84337	1294.4	0.71841	1294.4	0.10011	1294.4	0.0054135	1294.4	0.0010073
1294.5	0.84085	1294.5	0.72033	1294.5	0.101	1294.5	0.005417	1294.5	0.0010075
1294.6	0.83826	1294.6	0.72177	1294.6	0.10185	1294.5	0.0054098	1294.6	0.00099058
1294.6	0.83617	1294.6	0.72378	1294.6	0.10279	1294.6	0.0053883	1294.6	0.00099654
1294.7	0.83354	1294.7	0.72582	1294.7	0.10368	1294.7	0.0053623	1294.7	0.0010048
1294.8	0.83079	1294.8	0.72734	1294.8	0.10455	1294.8	0.0053547	1294.8	0.00099707
1294.9	0.82867	1294.9	0.72935	1294.9	0.10552	1294.9	0.0053261	1294.9	0.00096954
1295	0.82615	1295	0.73157	1295	0.10648	1295	0.0053267	1295	0.00096454
1295	0.82331	1295	0.73311	1295	0.10736	1295	0.005306	1295	0.00097083
1295.1	0.82112	1295.1	0.73514	1295.1	0.10836	1295.1	0.005284	1295.1	0.00097452
1295.2	0.81868	1295.2	0.73744	1295.2	0.10938	1295.2	0.0052478	1295.2	0.0009907
1295.3	0.81574	1295.3	0.73917	1295.3	0.11027	1295.3	0.0052144	1295.3	0.001023
1295.4	0.81361	1295.4	0.7411	1295.4	0.11131	1295.4	0.0052071	1295.4	0.0010397
1295.5	0.81124	1295.5	0.74345	1295.5	0.11236	1295.5	0.0051775	1295.5	0.0010736
1295.5	0.80837	1295.5	0.74535	1295.5	0.11331	1295.5	0.005137	1295.5	0.0011052
1295.6	0.8062	1295.6	0.74733	1295.6	0.11439	1295.6	0.0051023	1295.6	0.0011526
1295.7	0.80399	1295.7	0.7497	1295.7	0.1155	1295.7	0.005073	1295.7	0.0011917
1295.8	0.80117	1295.8	0.75164	1295.8	0.1165	1295.8	0.0050538	1295.8	0.0012425
1295.9	0.79894	1295.9	0.75355	1295.9	0.11758	1295.9	0.0050132	1295.9	0.0013051
1296	0.79689	1295.9	0.75577	1296	0.11878	1295.9	0.004987	1296	0.0013502
1296	0.79412	1296	0.75777	1296	0.11982	1296	0.0049584	1296	0.0014094
1296.1	0.7919	1296.1	0.75965	1296.1	0.12094	1296.1	0.0049477	1296.1	0.0014591
1296.2	0.78987	1296.2	0.76171	1296.2	0.12215	1296.2	0.0049421	1296.2	0.0015195
1296.3	0.7872	1296.3	0.76368	1296.3	0.12324	1296.3	0.0048988	1296.3	0.001572
1296.4	0.78485	1296.4	0.76546	1296.4	0.12438	1296.4	0.0048832	1296.4	0.001612
1296.4	0.78284	1296.4	0.76739	1296.4	0.1256	1296.4	0.0048684	1296.4	0.0016819
1296.5	0.78023	1296.5	0.76923	1296.5	0.12677	1296.5	0.0048453	1296.5	0.001749
1296.6	0.7778	1296.6	0.77094	1296.6	0.12788	1296.6	0.0048409	1296.6	0.0017964
1296.7	0.7757	1296.7	0.77265	1296.7	0.12909	1296.7	0.0048157	1296.7	0.0018473
1296.8	0.77313	1296.8	0.77439	1296.8	0.13026	1296.8	0.004808	1296.8	0.0019053
1296.9	0.77065	1296.9	0.77605	1296.9	0.13141	1296.9	0.004801	1296.9	0.0019599
1296.9	0.76848	1296.9	0.7776	1296.9	0.13257	1296.9	0.0047993	1296.9	0.0020258
1297	0.7659	1297	0.77918	1297	0.13374	1297	0.0048062	1297	0.0020801
1297.1	0.76338	1297.1	0.78079	1297.1	0.13485	1297.1	0.0047993	1297.1	0.0021354
1297.2	0.76108	1297.2	0.78223	1297.2	0.13601	1297.2	0.0047931	1297.2	0.0021853
1297.3	0.75863	1297.3	0.78366	1297.3	0.13717	1297.3	0.00479	1297.3	0.0022372
1297.4	0.75606	1297.3	0.7852	1297.4	0.13828	1297.3	0.0047935	1297.4	0.002266
1297.4	0.75368	1297.4	0.78653	1297.4	0.1394	1297.4	0.0047959	1297.4	0.0023125
1297.5	0.75121	1297.5	0.78783	1297.5	0.14054	1297.5	0.004801	1297.5	0.0023689
1297.6	0.7488	1297.6	0.78947	1297.6	0.1417	1297.6	0.0048078	1297.6	0.002412
1297.7	0.74629	1297.7	0.79071	1297.7	0.1428	1297.7	0.0047893	1297.7	0.0024509
1297.8	0.74386	1297.8	0.79191	1297.8	0.14394	1297.8	0.0048017	1297.8	0.0024733
1297.8	0.74149	1297.8	0.79343	1297.8	0.1451	1297.8	0.0048403	1297.8	0.0024873
1297.9	0.739	1297.9	0.79472	1297.9	0.14622	1297.9	0.0048604	1297.9	0.002518
1298	0.73653	1298	0.79577	1298	0.14736	1298	0.0048616	1298	0.0025407
1298.1	0.73425	1298.1	0.79733	1298.1	0.14856	1298.1	0.0048767	1298.1	0.0025586
1298.2	0.73172	1298.2	0.79871	1298.2	0.14969	1298.2	0.0048903	1298.2	0.0025543
1298.3	0.72922	1298.3	0.7997	1298.3	0.15084	1298.3	0.0049268	1298.3	0.0025433
1298.3	0.72703	1298.3	0.80125	1298.3	0.15208	1298.3	0.004957	1298.3	0.002544
1298.4	0.7245	1298.4	0.80268	1298.4	0.15327	1298.4	0.0049643	1298.4	0.0025115
1298.5	0.72189	1298.5	0.80357	1298.5	0.15441	1298.5	0.005004	1298.5	0.0024812
1298.6	0.71972	1298.6	0.8051	1298.6	0.15571	1298.6	0.005028	1298.6	0.0024407
1298.7	0.71723	1298.7	0.80669	1298.7	0.15695	1298.7	0.0050749	1298.7	0.0023947
1298.8	0.71455	1298.8	0.80766	1298.8	0.15815	1298.7	0.0051265	1298.8	0.0023424
1298.8	0.71233	1298.8	0.80912	1298.8	0.1595	1298.8	0.0051644	1298.8	0.0023035
1298.9	0.70988	1298.9	0.81078	1298.9	0.16082	1298.9	0.0052269	1298.9	0.002263
1299	0.70707	1299	0.81182	1299	0.16202	1299	0.005278	1299	0.0022017
1299.1	0.70483	1299.1	0.81324	1299.1	0.1634	1299.1	0.0053368	1299.1	0.0021451
1299.2	0.70243	1299.2	0.81505	1299.2	0.16474	1299.2	0.005404	1299.2	0.002101
1299.3	0.69962	1299.2	0.8162	1299.3	0.16599	1299.2	0.0054682	1299.3	0.0020472
1299.3	0.69743	1299.3	0.81762	1299.3	0.16739	1299.3	0.0055199	1299.3	0.0019948
1299.4	0.6951	1299.4	0.81944	1299.4	0.16879	1299.4	0.0055784	1299.4	0.0019814
1299.5	0.69229	1299.5	0.82077	1299.5	0.17005	1299.5	0.0056283	1299.5	0.0019471
1299.6	0.69011	1299.6	0.82211	1299.6	0.17145	1299.6	0.0056732	1299.6	0.0019175
1299.7	0.68795	1299.7	0.824	1299.7	0.17291	1299.7	0.0057221	1299.7	0.0018916
1299.7	0.68525	1299.7	0.82538	1299.7	0.17421	1299.7	0.0057545	1299.7	0.001895
1299.8	0.68312	1299.8	0.82682	1299.8	0.1756	1299.8	0.0057955	1299.8	0.0019014
1299.9	0.68112	1299.9	0.82866	1299.9	0.17709	1299.9	0.0058336	1299.9	0.0018808
1300	0.67854	1300	0.83018	1300	0.1784	1300	0.0058363	1300	0.0018957
1300.1	0.67647	1300.1	0.83161	1300.1	0.1798	1300.1	0.0058566	1300.1	0.0019015
1300.2	0.6747	1300.2	0.83336	1300.2	0.18131	1300.2	0.0058448	1300.2	0.0019084
1300.2	0.67232	1300.2	0.835	1300.2	0.18268	1300.2	0.0058278	1300.2	0.0019246
1300.3	0.67029	1300.3	0.83643	1300.3	0.18411	1300.3	0.0058383	1300.3	0.0019332
1300.4	0.66864	1300.4	0.83813	1300.4	0.18564	1300.4	0.0058075	1300.4	0.0019557
1300.5	0.66642	1300.5	0.83975	1300.5	0.18703	1300.5	0.0057804	1300.5	0.0019591
1300.6	0.6644	1300.6	0.84123	1300.6	0.18843	1300.6	0.0057493	1300.6	0.0019471
1300.7	0.66274	1300.7	0.84283	1300.7	0.18997	1300.7	0.0057136	1300.7	0.0019636
1300.7	0.66068	1300.7	0.84446	1300.7	0.19144	1300.7	0.0056902	1300.7	0.0019681
1300.8	0.6586	1300.8	0.84597	1300.8	0.19285	1300.8	0.0056642	1300.8	0.0019626
1300.9	0.6568	1300.9	0.84746	1300.9	0.19435	1300.9	0.0056295	1300.9	0.0019509
1301	0.65466	1301	0.84903	1301	0.19584	1301	0.0055804	1301	0.0019343
1301.1	0.65253	1301.1	0.85056	1301.1	0.19725	1301.1	0.0055312	1301.1	0.0019333
1301.2	0.65059	1301.2	0.85196	1301.2	0.19875	1301.2	0.0055053	1301.2	0.0019154
1301.2	0.6484	1301.2	0.85341	1301.2	0.20024	1301.2	0.0054695	1301.2	0.0019016
1301.3	0.64613	1301.3	0.85502	1301.3	0.20169	1301.3	0.0054421	1301.3	0.0018928
1301.4	0.64393	1301.4	0.85643	1301.4	0.20316	1301.4	0.0054266	1301.4	0.0018919
1301.5	0.6416	1301.5	0.8577	1301.5	0.20466	1301.5	0.0054047	1301.5	0.0018953
1301.6	0.63921	1301.6	0.85932	1301.6	0.20614	1301.6	0.0053634	1301.6	0.0018917
1301.7	0.63673	1301.7	0.86061	1301.7	0.20756	1301.6	0.0053415	1301.7	0.001897
1301.7	0.63423	1301.7	0.86186	1301.7	0.20905	1301.7	0.0053319	1301.7	0.0018865
1301.8	0.63167	1301.8	0.86345	1301.8	0.21055	1301.8	0.0053202	1301.8	0.0018924
1301.9	0.629	1301.9	0.86484	1301.9	0.212	1301.9	0.005272	1301.9	0.0019091
1302	0.62634	1302	0.8659	1302	0.21345	1302	0.0052295	1302	0.0019197
1302.1	0.62375	1302.1	0.86745	1302.1	0.215	1302.1	0.0052017	1302.1	0.0019367
1302.2	0.62097	1302.1	0.86887	1302.2	0.21643	1302.1	0.0051812	1302.2	0.0019554
1302.2	0.61816	1302.2	0.86979	1302.2	0.21787	1302.2	0.0051428	1302.2	0.0019854
1302.3	0.61558	1302.3	0.8713	1302.3	0.21944	1302.3	0.0051044	1302.3	0.0020299
1302.4	0.61281	1302.4	0.87274	1302.4	0.22092	1302.4	0.0050683	1302.4	0.0020555
1302.5	0.60993	1302.5	0.87364	1302.5	0.22236	1302.5	0.0050307	1302.5	0.0020842
1302.6	0.60749	1302.6	0.87505	1302.6	0.22397	1302.6	0.0049885	1302.6	0.002103
1302.7	0.60471	1302.6	0.87657	1302.7	0.22551	1302.6	0.0049527	1302.6	0.0021387
1302.7	0.60188	1302.7	0.8774	1302.7	0.22698	1302.7	0.0049057	1302.7	0.0021484
1302.8	0.5995	1302.8	0.8787	1302.8	0.22862	1302.8	0.0048726	1302.8	0.0021844
1302.9	0.59696	1302.9	0.88028	1302.9	0.2302	1302.9	0.0048498	1302.9	0.0021947
1303	0.5942	1303	0.88116	1303	0.23167	1303	0.0048383	1303	0.0022026
1303.1	0.59195	1303.1	0.88236	1303.1	0.23335	1303.1	0.0048289	1303.1	0.0022115
1303.2	0.58961	1303.1	0.88392	1303.2	0.235	1303.1	0.0048268	1303.1	0.0022112
1303.2	0.58694	1303.2	0.88482	1303.2	0.23649	1303.2	0.0048282	1303.2	0.0021985
1303.3	0.5849	1303.3	0.88595	1303.3	0.23818	1303.3	0.0048406	1303.3	0.0021915
1303.4	0.58271	1303.4	0.88758	1303.4	0.23993	1303.4	0.0048737	1303.4	0.0021882
1303.5	0.58024	1303.5	0.88859	1303.5	0.24145	1303.5	0.0049077	1303.5	0.0021428
1303.6	0.57827	1303.6	0.8896	1303.6	0.24314	1303.6	0.0049682	1303.6	0.0021074
1303.6	0.57638	1303.6	0.89118	1303.6	0.24493	1303.6	0.0050389	1303.6	0.0020798
1303.7	0.57402	1303.7	0.89223	1303.7	0.24645	1303.7	0.0051116	1303.7	0.0020476
1303.8	0.5722	1303.8	0.89326	1303.8	0.24814	1303.8	0.0052012	1303.8	0.0019863
1303.9	0.57054	1303.9	0.89479	1303.9	0.24999	1303.9	0.0052705	1303.9	0.0019452
1304	0.56845	1304	0.89599	1304	0.25158	1304	0.0053564	1304	0.0019051
1304.1	0.56676	1304.1	0.89702	1304.1	0.25326	1304.1	0.0054515	1304.1	0.0018444
1304.1	0.56525	1304.1	0.89853	1304.1	0.25512	1304.1	0.0055346	1304.1	0.0017742
1304.2	0.56332	1304.2	0.89982	1304.2	0.25676	1304.2	0.0056357	1304.2	0.0017083
1304.3	0.56166	1304.3	0.90085	1304.3	0.25841	1304.3	0.0057264	1304.3	0.0016373
1304.4	0.56039	1304.4	0.9023	1304.4	0.26026	1304.4	0.0057856	1304.4	0.0015733
1304.5	0.55869	1304.5	0.90369	1304.5	0.26195	1304.5	0.0058538	1304.5	0.0014962
1304.6	0.55711	1304.6	0.90483	1304.6	0.26363	1304.6	0.005917	1304.6	0.0014178
1304.6	0.55588	1304.6	0.90618	1304.6	0.26547	1304.6	0.0059753	1304.6	0.0013548
1304.7	0.55432	1304.7	0.90759	1304.7	0.26722	1304.7	0.0060312	1304.7	0.0012607
1304.8	0.55273	1304.8	0.90874	1304.8	0.26888	1304.8	0.0060754	1304.8	0.0011708
1304.9	0.55152	1304.9	0.90998	1304.9	0.27072	1304.9	0.0060906	1304.9	0.0011005
1305	0.55002	1305	0.91135	1305	0.27251	1305	0.0060996	1305	0.0010379
1305.1	0.54847	1305.1	0.91262	1305.1	0.2742	1305.1	0.0061129	1305.1	0.00097473
1305.2	0.54718	1305.1	0.91373	1305.2	0.27601	1305.1	0.006141	1305.1	0.00088765
1305.2	0.54568	1305.2	0.91499	1305.2	0.27783	1305.2	0.0061452	1305.2	0.00081428
1305.3	0.54412	1305.3	0.91628	1305.3	0.27957	1305.3	0.006161	1305.3	0.00074324
1305.4	0.54265	1305.4	0.91733	1305.4	0.28137	1305.4	0.0061489	1305.4	0.00068521
1305.5	0.54109	1305.5	0.91841	1305.5	0.2832	1305.5	0.0061384	1305.5	0.0006383
1305.6	0.53943	1305.6	0.91972	1305.6	0.28498	1305.6	0.0061404	1305.6	0.00056651
1305.7	0.53777	1305.6	0.92074	1305.7	0.28677	1305.6	0.0061691	1305.6	0.00053598
1305.7	0.53607	1305.7	0.92164	1305.7	0.28859	1305.7	0.0061721	1305.7	0.00049573
1305.8	0.53429	1305.8	0.9229	1305.8	0.29039	1305.8	0.0061759	1305.8	0.00047862
1305.9	0.53249	1305.9	0.92389	1305.9	0.29218	1305.9	0.0061733	1305.9	0.00046485
1306	0.53062	1306	0.92465	1306	0.29399	1306	0.0062117	1306	0.00044229
1306.1	0.52875	1306.1	0.9258	1306.1	0.29586	1306.1	0.0062483	1306.1	0.00043427
1306.2	0.52674	1306.1	0.92688	1306.2	0.29763	1306.1	0.0062821	1306.2	0.00044241
1306.2	0.52467	1306.2	0.92746	1306.2	0.29942	1306.2	0.0063064	1306.2	0.00045746
1306.3	0.52276	1306.3	0.9286	1306.3	0.30132	1306.3	0.0063368	1306.3	0.0004597
1306.4	0.52064	1306.4	0.92976	1306.4	0.30309	1306.4	0.0063551	1306.4	0.00046778
1306.5	0.51846	1306.5	0.93035	1306.5	0.30486	1306.5	0.0063748	1306.5	0.00048753
1306.6	0.51654	1306.6	0.93142	1306.6	0.30678	1306.6	0.0063986	1306.6	0.00050343
1306.7	0.51435	1306.7	0.93268	1306.7	0.30861	1306.6	0.0064181	1306.7	0.0005336
1306.7	0.51216	1306.7	0.93331	1306.7	0.31035	1306.7	0.0064354	1306.7	0.00055822
1306.8	0.51027	1306.8	0.9344	1306.8	0.3123	1306.8	0.0064536	1306.8	0.00059105
1306.9	0.50817	1306.9	0.93578	1306.9	0.31419	1306.9	0.0064507	1306.9	0.00059794
1307	0.50593	1307	0.93644	1307	0.31593	1307	0.0064336	1307	0.00062966
1307.1	0.50405	1307.1	0.9375	1307.1	0.31791	1307.1	0.0063851	1307.1	0.00064656
1307.2	0.5021	1307.2	0.93903	1307.2	0.31989	1307.1	0.0063484	1307.2	0.00067319
1307.2	0.49992	1307.2	0.93989	1307.2	0.32162	1307.2	0.0063062	1307.2	0.00068456
1307.3	0.49818	1307.3	0.94093	1307.3	0.32363	1307.3	0.0062333	1307.3	0.00070288
1307.4	0.49638	1307.4	0.94246	1307.4	0.32569	1307.4	0.0061855	1307.4	0.00069691
1307.5	0.49435	1307.5	0.94342	1307.5	0.32745	1307.5	0.0061191	1307.5	0.0006964
1307.6	0.49269	1307.6	0.94441	1307.6	0.32948	1307.6	0.0060456	1307.6	0.00068728
1307.7	0.4911	1307.7	0.9461	1307.7	0.33166	1307.7	0.0059684	1307.7	0.00069252
1307.7	0.48917	1307.7	0.94717	1307.7	0.33351	1307.7	0.0058865	1307.7	0.00066434
1307.8	0.48759	1307.8	0.94806	1307.8	0.33556	1307.8	0.0057886	1307.8	0.0006332
1307.9	0.48623	1307.9	0.94961	1307.9	0.3378	1307.9	0.0057	1307.9	0.00061247
1308	0.48443	1308	0.95076	1308	0.33975	1308	0.0056248	1308	0.00055297
1308.1	0.48295	1308.1	0.95167	1308.1	0.34179	1308.1	0.0055499	1308.1	0.00050475
1308.2	0.48174	1308.2	0.95317	1308.2	0.34411	1308.2	0.0054973	1308.2	0.00045493
1308.2	0.48015	1308.2	0.95439	1308.2	0.34615	1308.2	0.0054478	1308.2	0.00041544
1308.3	0.47875	1308.3	0.95518	1308.3	0.34822	1308.3	0.0054071	1308.3	0.00035338
1308.4	0.47762	1308.4	0.9565	1308.4	0.35056	1308.4	0.0053707	1308.4	0.00027886
1308.5	0.47613	1308.5	0.95765	1308.5	0.3527	1308.5	0.005387	1308.5	0.00020903
1308.6	0.47465	1308.6	0.95847	1308.6	0.35477	1308.6	0.0053771	1308.6	0.00014146
1308.7	0.47353	1308.7	0.9596	1308.7	0.35713	1308.7	0.005406	1308.7	7.2832e-05
1308.7	0.47211	1308.7	0.96075	1308.7	0.35932	1308.7	0.0054202	1308.7	1.9355e-05
1308.8	0.47059	1308.8	0.96155	1308.8	0.36138	1308.8	0.0054482	1308.8	-3.4976e-05
1308.9	0.46946	1308.9	0.96252	1308.9	0.3637	1308.9	0.0054813	1308.9	-7.921e-05
1309	0.46802	1309	0.96355	1309	0.36589	1309	0.0055466	1309	-0.0001452
1309.1	0.46649	1309.1	0.96438	1309.1	0.368	1309.1	0.0056234	1309.1	-0.00019555
1309.2	0.46518	1309.2	0.96519	1309.2	0.37023	1309.2	0.0056854	1309.2	-0.00024282
1309.3	0.46371	1309.2	0.96616	1309.3	0.37248	1309.2	0.005748	1309.3	-0.00026646
1309.3	0.46212	1309.3	0.96709	1309.3	0.37454	1309.3	0.005816	1309.3	-0.00027366
1309.4	0.46064	1309.4	0.96782	1309.4	0.37674	1309.4	0.0058829	1309.4	-0.00025947
1309.5	0.45908	1309.5	0.96863	1309.5	0.37892	1309.5	0.0059611	1309.5	-0.00025726
1309.6	0.45738	1309.6	0.96955	1309.6	0.38101	1309.6	0.0060285	1309.6	-0.00025127
1309.7	0.4558	1309.7	0.97034	1309.7	0.38314	1309.7	0.0060846	1309.7	-0.00021661
1309.8	0.45419	1309.8	0.97109	1309.8	0.38528	1309.7	0.0061336	1309.8	-0.00018936
1309.8	0.45245	1309.8	0.97203	1309.8	0.38741	1309.8	0.0061881	1309.8	-0.00014185
1309.9	0.45067	1309.9	0.97284	1309.9	0.38948	1309.9	0.0062371	1309.9	-6.8723e-05
1310	0.44899	1310	0.9734	1310	0.3916	1310	0.0062981	1310	-8.7006e-06
1310.1	0.44727	1310.1	0.97437	1310.1	0.39368	1310.1	0.0063231	1310.1	7.1058e-05
1310.2	0.44546	1310.2	0.97528	1310.2	0.39573	1310.2	0.0063667	1310.2	0.00016191
1310.3	0.4437	1310.3	0.9758	1310.3	0.39777	1310.3	0.0063868	1310.3	0.00025977
1310.3	0.44204	1310.3	0.97676	1310.3	0.39994	1310.3	0.0064146	1310.3	0.00034637
1310.4	0.44022	1310.4	0.97772	1310.4	0.40198	1310.4	0.0064328	1310.4	0.000447
1310.5	0.43846	1310.5	0.97812	1310.5	0.40396	1310.5	0.0064518	1310.5	0.00053861
1310.6	0.43685	1310.6	0.97895	1310.6	0.40615	1310.6	0.00644	1310.6	0.00062968
1310.7	0.43514	1310.7	0.98001	1310.7	0.40822	1310.7	0.0064568	1310.7	0.00072038
1310.8	0.43349	1310.8	0.98036	1310.8	0.41018	1310.8	0.0064564	1310.8	0.00080225
1310.8	0.43198	1310.8	0.98111	1310.8	0.41241	1310.8	0.0064634	1310.8	0.00089778
1310.9	0.43037	1310.9	0.98215	1310.9	0.41455	1310.9	0.0064656	1310.9	0.00098632
1311	0.4287	1311	0.9825	1311	0.41647	1311	0.0064599	1311	0.0010768
1311.1	0.42733	1311.1	0.9831	1311.1	0.41871	1311.1	0.0064575	1311.1	0.0011415
1311.2	0.42594	1311.2	0.98416	1311.2	0.42094	1311.2	0.0064809	1311.2	0.0012233
1311.3	0.42437	1311.3	0.98447	1311.3	0.42284	1311.3	0.0064995	1311.3	0.0012901
1311.4	0.42318	1311.4	0.98492	1311.4	0.4251	1311.3	0.0065064	1311.4	0.0013682
1311.4	0.42196	1311.4	0.98602	1311.4	0.42742	1311.4	0.0065135	1311.4	0.001418
1311.5	0.4205	1311.5	0.98641	1311.5	0.42937	1311.5	0.0065038	1311.5	0.001476
1311.6	0.41927	1311.6	0.98671	1311.6	0.43157	1311.6	0.0065027	1311.6	0.0015232
1311.7	0.41822	1311.7	0.98776	1311.7	0.43401	1311.7	0.0064893	1311.7	0.0015776
1311.8	0.41684	1311.8	0.98821	1311.8	0.436	1311.8	0.006493	1311.8	0.0016321
1311.9	0.41574	1311.9	0.98846	1311.9	0.43823	1311.9	0.0064827	1311.9	0.0016828
1311.9	0.41486	1311.9	0.9895	1311.9	0.44073	1311.9	0.0065069	1311.9	0.0017281
1312	0.41353	1312	0.99009	1312	0.44282	1312	0.0065084	1312	0.0017692
1312.1	0.41246	1312.1	0.99033	1312.1	0.445	1312.1	0.0065052	1312.1	0.0018164
1312.2	0.41154	1312.2	0.99127	1312.2	0.44753	1312.2	0.0065147	1312.2	0.0018652
1312.3	0.41025	1312.3	0.9919	1312.3	0.44972	1312.3	0.0064946	1312.3	0.0019057
1312.4	0.40911	1312.4	0.99219	1312.4	0.45192	1312.4	0.0064961	1312.4	0.0019379
1312.5	0.40821	1312.4	0.99309	1312.5	0.45452	1312.4	0.0065078	1312.4	0.0019711
1312.5	0.407	1312.5	0.99387	1312.5	0.45678	1312.5	0.006533	1312.5	0.002014
1312.6	0.40579	1312.6	0.99418	1312.6	0.45899	1312.6	0.0065298	1312.6	0.0020402
1312.7	0.40489	1312.7	0.9949	1312.7	0.46156	1312.7	0.0065667	1312.7	0.0020748
1312.8	0.40367	1312.8	0.99564	1312.8	0.46391	1312.8	0.0065856	1312.8	0.0021141
1312.9	0.40233	1312.9	0.99599	1312.9	0.46612	1312.9	0.0066276	1312.9	0.0021263
1313	0.40134	1313	0.99659	1313	0.46868	1313	0.0066615	1313	0.0021212
1313	0.4001	1313	0.99725	1313	0.4711	1313	0.0067264	1313	0.0021471
1313.1	0.39869	1313.1	0.99764	1313.1	0.47334	1313.1	0.0067803	1313.1	0.0021767
1313.2	0.39757	1313.2	0.99803	1313.2	0.47583	1313.2	0.0068324	1313.2	0.0021627
1313.3	0.39626	1313.3	0.9985	1313.3	0.47828	1313.3	0.0068947	1313.3	0.0021583
1313.4	0.39481	1313.4	0.99877	1313.4	0.48051	1313.4	0.0069558	1313.4	0.0021604
1313.5	0.3935	1313.5	0.99899	1313.5	0.48296	1313.5	0.0070236	1313.5	0.0021421
1313.5	0.3922	1313.5	0.99922	1313.5	0.4854	1313.5	0.0070823	1313.5	0.0021135
1313.6	0.39065	1313.6	0.99943	1313.6	0.48768	1313.6	0.0071608	1313.6	0.0020962
1313.7	0.38925	1313.7	0.99946	1313.7	0.49002	1313.7	0.0072309	1313.7	0.0020811
1313.8	0.38782	1313.8	0.99944	1313.8	0.49242	1313.8	0.0073069	1313.8	0.002083
1313.9	0.38627	1313.9	0.99946	1313.9	0.49472	1313.9	0.0073797	1313.9	0.0020774
1314	0.38483	1314	0.99944	1314	0.497	1314	0.0074564	1314	0.0020622
1314.1	0.38344	1314.1	0.99921	1314.1	0.49931	1314	0.0075388	1314.1	0.0020301
1314.1	0.38189	1314.1	0.9992	1314.1	0.50162	1314.1	0.0075982	1314.1	0.0020123
1314.2	0.38039	1314.2	0.99913	1314.2	0.50385	1314.2	0.0076721	1314.2	0.0019992
1314.3	0.37899	1314.3	0.99868	1314.3	0.50608	1314.3	0.0077223	1314.3	0.0019862
1314.4	0.37753	1314.4	0.9986	1314.4	0.5084	1314.4	0.0078033	1314.4	0.0019636
1314.5	0.37604	1314.5	0.99858	1314.5	0.51058	1314.5	0.00787	1314.5	0.001968
1314.6	0.37456	1314.6	0.99806	1314.6	0.51271	1314.6	0.0079382	1314.6	0.0019734
1314.6	0.37322	1314.6	0.99804	1314.6	0.51505	1314.6	0.0080005	1314.6	0.0019769
1314.7	0.37173	1314.7	0.99814	1314.7	0.51724	1314.7	0.0081006	1314.7	0.001988
1314.8	0.37022	1314.8	0.99766	1314.8	0.51928	1314.8	0.0081727	1314.8	0.0020298
1314.9	0.36886	1314.9	0.99757	1314.9	0.52162	1314.9	0.0082509	1314.9	0.002063
1315	0.36741	1315	0.99789	1315	0.52385	1315	0.008323	1315	0.0020891
1315.1	0.36587	1315.1	0.99748	1315.1	0.52584	1315.1	0.0083802	1315.1	0.0021229
1315.2	0.36457	1315.2	0.99745	1315.2	0.52818	1315.1	0.0084741	1315.2	0.0021489
1315.2	0.36319	1315.2	0.99798	1315.2	0.53052	1315.2	0.0085674	1315.2	0.0022103
1315.3	0.3616	1315.3	0.99778	1315.3	0.53247	1315.3	0.0086585	1315.3	0.0022632
1315.4	0.36025	1315.4	0.99767	1315.4	0.53477	1315.4	0.0087298	1315.4	0.0023093
1315.5	0.35881	1315.5	0.9983	1315.5	0.53718	1315.5	0.0088331	1315.5	0.0023516
1315.6	0.35719	1315.6	0.99825	1315.6	0.53917	1315.6	0.0089316	1315.6	0.0024109
1315.7	0.35574	1315.7	0.99814	1315.7	0.54147	1315.7	0.0090281	1315.7	0.0024676
1315.8	0.35438	1315.7	0.99892	1315.8	0.544	1315.7	0.0091473	1315.7	0.0025055
1315.8	0.35272	1315.8	0.99902	1315.8	0.54606	1315.8	0.009261	1315.8	0.0025519
1315.9	0.35117	1315.9	0.9988	1315.9	0.5483	1315.9	0.0093882	1315.9	0.0025658
1316	0.34978	1316	0.99943	1316	0.55091	1316	0.0095287	1316	0.0025855
1316.1	0.34797	1316.1	0.9996	1316.1	0.55304	1316.1	0.0096399	1316.1	0.0026058
1316.2	0.34638	1316.2	0.99934	1316.2	0.55532	1316.2	0.0097737	1316.2	0.0026166
1316.3	0.34488	1316.3	0.99982	1316.3	0.558	1316.3	0.009936	1316.3	0.0026093
1316.3	0.34312	1316.3	0.99998	1316.3	0.56027	1316.3	0.010083	1316.3	0.0026025
1316.4	0.34146	1316.4	0.99968	1316.4	0.56253	1316.4	0.010251	1316.4	0.0025902
1316.5	0.33999	1316.5	0.9999	1316.5	0.56522	1316.5	0.01043	1316.5	0.0025582
1316.6	0.3382	1316.6	1	1316.6	0.56758	1316.6	0.010621	1316.6	0.0025236
1316.7	0.33645	1316.7	0.99961	1316.7	0.56987	1316.7	0.010804	1316.7	0.0024787
1316.8	0.33496	1316.8	0.99967	1316.8	0.57261	1316.8	0.011032	1316.8	0.0024202
1316.9	0.33324	1316.8	0.99966	1316.9	0.57508	1316.8	0.011248	1316.9	0.0023629
1316.9	0.33152	1316.9	0.99918	1316.9	0.57737	1316.9	0.011467	1316.9	0.0022797
1317	0.33013	1317	0.99898	1317	0.58008	1317	0.011728	1317	0.0022075
1317.1	0.32852	1317.1	0.99883	1317.1	0.58259	1317.1	0.011982	1317.1	0.0021545
1317.2	0.32679	1317.2	0.99829	1317.2	0.58488	1317.2	0.012233	1317.2	0.0020637
1317.3	0.3254	1317.3	0.99792	1317.3	0.58754	1317.3	0.012502	1317.3	0.0019747
1317.4	0.32389	1317.4	0.99763	1317.4	0.59015	1317.4	0.012804	1317.4	0.0019059
1317.4	0.32232	1317.4	0.99709	1317.4	0.59246	1317.4	0.013103	1317.4	0.0018506
1317.5	0.3209	1317.5	0.99656	1317.5	0.59507	1317.5	0.013408	1317.5	0.0017986
1317.6	0.31951	1317.6	0.99607	1317.6	0.59766	1317.6	0.013711	1317.6	0.0017326
1317.7	0.31802	1317.7	0.99548	1317.7	0.59998	1317.7	0.014037	1317.7	0.0016964
1317.8	0.31676	1317.8	0.99493	1317.8	0.60246	1317.8	0.014334	1317.8	0.0016598
1317.9	0.31552	1317.9	0.99439	1317.9	0.60506	1317.9	0.014677	1317.9	0.0016358
1318	0.31416	1318	0.99381	1318	0.60742	1318	0.015011	1318	0.001601
1318	0.31288	1318	0.99319	1318	0.6098	1318	0.015322	1318	0.0015741
1318.1	0.31166	1318.1	0.99244	1318.1	0.61227	1318.1	0.01566	1318.1	0.0015746
1318.2	0.31038	1318.2	0.99188	1318.2	0.61466	1318.2	0.015971	1318.2	0.0015919
1318.3	0.3092	1318.3	0.9913	1318.3	0.61697	1318.3	0.016281	1318.3	0.0016059
1318.4	0.308	1318.4	0.99045	1318.4	0.61934	1318.4	0.016589	1318.4	0.0016334
1318.5	0.30678	1318.5	0.98993	1318.5	0.62174	1318.5	0.016911	1318.5	0.0016581
1318.6	0.30558	1318.6	0.98946	1318.6	0.62399	1318.5	0.017211	1318.6	0.0016942
1318.6	0.30441	1318.6	0.98852	1318.6	0.6262	1318.6	0.017497	1318.6	0.0017238
1318.7	0.30328	1318.7	0.98802	1318.7	0.62858	1318.7	0.017797	1318.7	0.0017591
1318.8	0.30204	1318.8	0.98767	1318.8	0.63083	1318.8	0.018098	1318.8	0.0018029
1318.9	0.30085	1318.9	0.98676	1318.9	0.63291	1318.9	0.018377	1318.9	0.0018414
1319	0.2997	1319	0.98619	1319	0.63527	1319	0.018662	1319	0.0018777
1319.1	0.29845	1319.1	0.986	1319.1	0.63753	1319.1	0.018951	1319.1	0.0019272
1319.2	0.29711	1319.1	0.9851	1319.2	0.6395	1319.1	0.01922	1319.1	0.0019755
1319.2	0.29593	1319.2	0.98446	1319.2	0.64181	1319.2	0.019524	1319.2	0.002015
1319.3	0.29463	1319.3	0.98441	1319.3	0.64408	1319.3	0.019812	1319.3	0.0020618
1319.4	0.29322	1319.4	0.98361	1319.4	0.64602	1319.4	0.020098	1319.4	0.0020793
1319.5	0.29196	1319.5	0.98288	1319.5	0.64824	1319.5	0.020402	1319.5	0.0020944
1319.6	0.29064	1319.6	0.98296	1319.6	0.65062	1319.6	0.020707	1319.6	0.00211
1319.7	0.28909	1319.7	0.98234	1319.7	0.65251	1319.7	0.020974	1319.7	0.0021172
1319.7	0.28766	1319.7	0.98153	1319.7	0.65468	1319.7	0.021293	1319.7	0.0021258
1319.8	0.28625	1319.8	0.98156	1319.8	0.65711	1319.8	0.021647	1319.8	0.0021281
1319.9	0.28459	1319.9	0.98098	1319.9	0.65903	1319.9	0.021962	1319.9	0.0021195
1320	0.28305	1320	0.98014	1320	0.66117	1320	0.022302	1320	0.0020995
1320.1	0.28158	1320.1	0.98011	1320.1	0.6637	1320.1	0.022639	1320.1	0.0020936
1320.2	0.27982	1320.2	0.97963	1320.2	0.66569	1320.2	0.022988	1320.2	0.0020719
1320.3	0.27818	1320.3	0.97875	1320.3	0.66777	1320.3	0.02334	1320.3	0.0020583
1320.3	0.27656	1320.3	0.97853	1320.3	0.67036	1320.3	0.023736	1320.3	0.0020211
1320.4	0.27478	1320.4	0.97806	1320.4	0.67242	1320.4	0.024088	1320.4	0.0019935
1320.5	0.27304	1320.5	0.9771	1320.5	0.6745	1320.5	0.024471	1320.5	0.0019513
1320.6	0.27139	1320.6	0.9767	1320.6	0.67716	1320.6	0.024905	1320.6	0.0019103
1320.7	0.26954	1320.7	0.97615	1320.7	0.67935	1320.7	0.025329	1320.7	0.0018636
1320.8	0.26772	1320.8	0.97508	1320.8	0.68141	1320.8	0.02572	1320.8	0.0018143
1320.9	0.26609	1320.9	0.97447	1320.9	0.68405	1320.9	0.026164	1320.9	0.0017768
1320.9	0.26426	1320.9	0.97379	1320.9	0.68635	1320.9	0.026578	1320.9	0.0017565
1321	0.2624	1321	0.97265	1321	0.68837	1321	0.02702	1321	0.0017025
1321.1	0.26077	1321.1	0.97186	1321.1	0.69102	1321.1	0.027489	1321.1	0.0016953
1321.2	0.25895	1321.2	0.97112	1321.2	0.69343	1321.2	0.027961	1321.2	0.0016709
1321.3	0.2571	1321.3	0.9698	1321.3	0.69553	1321.3	0.028456	1321.3	0.0016563
1321.4	0.25546	1321.4	0.96881	1321.4	0.6981	1321.4	0.028955	1321.4	0.0016345
1321.5	0.25374	1321.5	0.9679	1321.5	0.70058	1321.5	0.029481	1321.5	0.0016357
1321.5	0.25194	1321.5	0.96662	1321.5	0.70268	1321.5	0.029963	1321.5	0.00165
1321.6	0.25035	1321.6	0.96542	1321.6	0.70515	1321.6	0.030534	1321.6	0.0016582
1321.7	0.2488	1321.7	0.96434	1321.7	0.7077	1321.7	0.031081	1321.7	0.0016721
1321.8	0.2471	1321.8	0.96309	1321.8	0.70985	1321.8	0.031646	1321.8	0.0016943
1321.9	0.2455	1321.9	0.9618	1321.9	0.71225	1321.9	0.032233	1321.9	0.0017165
1322	0.24398	1322	0.96056	1322	0.71472	1322	0.032848	1322	0.0017631
1322.1	0.24235	1322.1	0.95924	1322.1	0.71693	1322	0.033417	1322.1	0.0018046
1322.1	0.24087	1322.1	0.95792	1322.1	0.71922	1322.1	0.034003	1322.1	0.0018433
1322.2	0.23944	1322.2	0.95654	1322.2	0.72163	1322.2	0.034645	1322.2	0.0018942
1322.3	0.23791	1322.3	0.95531	1322.3	0.72389	1322.3	0.035252	1322.3	0.0019315
1322.4	0.23643	1322.4	0.95395	1322.4	0.72611	1322.4	0.035895	1322.4	0.0019692
1322.5	0.235	1322.5	0.95242	1322.5	0.72841	1322.5	0.036551	1322.5	0.0020281
1322.6	0.23356	1322.6	0.95113	1322.6	0.73066	1322.6	0.03718	1322.6	0.0020588
1322.7	0.23214	1322.7	0.94992	1322.7	0.73284	1322.6	0.037824	1322.7	0.0020939
1322.7	0.23069	1322.7	0.94831	1322.7	0.73498	1322.7	0.038462	1322.7	0.0021232
1322.8	0.22932	1322.8	0.94698	1322.8	0.73728	1322.8	0.039122	1322.8	0.0021451
1322.9	0.2279	1322.9	0.94582	1322.9	0.73945	1322.9	0.039747	1322.9	0.0021707
1323	0.22647	1323	0.94408	1323	0.74146	1323	0.040358	1323	0.0021816
1323.1	0.22508	1323.1	0.94259	1323.1	0.74368	1323.1	0.040985	1323.1	0.0021905
1323.2	0.2237	1323.2	0.94146	1323.2	0.74586	1323.2	0.041573	1323.2	0.002185
1323.3	0.22223	1323.3	0.93974	1323.3	0.74775	1323.2	0.042153	1323.3	0.0021705
1323.3	0.22087	1323.3	0.93812	1323.3	0.7499	1323.3	0.042738	1323.3	0.0021432
1323.4	0.21954	1323.4	0.93704	1323.4	0.75212	1323.4	0.04332	1323.4	0.0021341
1323.5	0.21812	1323.5	0.93525	1323.5	0.7539	1323.5	0.043867	1323.5	0.0021142
1323.6	0.21674	1323.6	0.93343	1323.6	0.75597	1323.6	0.044404	1323.6	0.0020963
1323.7	0.2153	1323.7	0.93233	1323.7	0.75822	1323.7	0.044927	1323.7	0.0020764
1323.8	0.21384	1323.8	0.93055	1323.8	0.75997	1323.8	0.045431	1323.8	0.0020576
1323.9	0.21249	1323.9	0.92863	1323.9	0.76196	1323.8	0.04599	1323.9	0.0020432
1323.9	0.21111	1323.9	0.92739	1323.9	0.76428	1323.9	0.046552	1323.9	0.0020224
1324	0.2096	1324	0.92566	1324	0.766	1324	0.047032	1324	0.0020124
1324.1	0.20822	1324.1	0.92359	1324.1	0.76792	1324.1	0.047553	1324.1	0.0020143
1324.2	0.20686	1324.2	0.9223	1324.2	0.77027	1324.2	0.048134	1324.2	0.0020302
1324.3	0.20538	1324.3	0.92061	1324.3	0.77198	1324.3	0.048661	1324.3	0.0020345
1324.4	0.20397	1324.4	0.91851	1324.4	0.77384	1324.4	0.049188	1324.4	0.0020549
1324.5	0.20265	1324.5	0.91719	1324.5	0.77625	1324.5	0.049785	1324.5	0.0020566
1324.5	0.20124	1324.5	0.91566	1324.5	0.77806	1324.5	0.05031	1324.5	0.0021002
1324.6	0.1998	1324.6	0.91355	1324.6	0.77982	1324.6	0.050905	1324.6	0.0021421
1324.7	0.19854	1324.7	0.91207	1324.7	0.78224	1324.7	0.051533	1324.7	0.0021816
1324.8	0.19713	1324.8	0.91063	1324.8	0.78416	1324.8	0.052144	1324.8	0.0022264
1324.9	0.19574	1324.9	0.90861	1324.9	0.78589	1324.9	0.052737	1324.9	0.002295
1325	0.19449	1325	0.90717	1325	0.78834	1325	0.053431	1325	0.0023633
1325.1	0.19315	1325.1	0.90579	1325.1	0.79039	1325.1	0.0541	1325.1	0.002423
1325.1	0.19182	1325.1	0.9039	1325.1	0.7921	1325.1	0.054771	1325.1	0.0024949
1325.2	0.19062	1325.2	0.90249	1325.2	0.79449	1325.2	0.055521	1325.2	0.0025803
1325.3	0.18937	1325.3	0.90121	1325.3	0.79666	1325.3	0.056271	1325.3	0.0026334
1325.4	0.18804	1325.4	0.89947	1325.4	0.79839	1325.4	0.056974	1325.4	0.0026964
1325.5	0.18691	1325.5	0.89807	1325.5	0.80073	1325.5	0.057743	1325.5	0.0027469
1325.6	0.18578	1325.6	0.89687	1325.6	0.80301	1325.6	0.058537	1325.6	0.0028043
1325.7	0.18457	1325.7	0.89523	1325.7	0.80479	1325.7	0.059306	1325.7	0.0028493
1325.7	0.18345	1325.7	0.89379	1325.7	0.80702	1325.7	0.060165	1325.7	0.0028739
1325.8	0.18236	1325.8	0.89258	1325.8	0.8093	1325.8	0.060983	1325.8	0.0029112
1325.9	0.18117	1325.9	0.89117	1325.9	0.81115	1325.9	0.061798	1325.9	0.002929
1326	0.18007	1326	0.88978	1326	0.81325	1326	0.06264	1326	0.0029444
1326.1	0.17907	1326.1	0.88844	1326.1	0.81553	1326.1	0.063511	1326.1	0.0029571
1326.2	0.17793	1326.2	0.88701	1326.2	0.81742	1326.2	0.064333	1326.2	0.0029355
1326.3	0.1769	1326.3	0.88557	1326.3	0.81946	1326.3	0.065218	1326.3	0.0029174
1326.4	0.1758	1326.3	0.88415	1326.4	0.82162	1326.3	0.066147	1326.3	0.0028814
1326.4	0.17468	1326.4	0.88265	1326.4	0.82354	1326.4	0.067024	1326.4	0.0028414
1326.5	0.17358	1326.5	0.88122	1326.5	0.82548	1326.5	0.067924	1326.5	0.0028106
1326.6	0.17253	1326.6	0.87963	1326.6	0.82751	1326.6	0.068828	1326.6	0.002749
1326.7	0.17136	1326.7	0.8781	1326.7	0.82943	1326.7	0.069729	1326.7	0.0026794
1326.8	0.17019	1326.8	0.87668	1326.8	0.83128	1326.8	0.070638	1326.8	0.0026212
1326.9	0.16903	1326.9	0.87483	1326.9	0.83315	1326.9	0.071558	1326.9	0.0025506
1327	0.16784	1327	0.87318	1327	0.83505	1326.9	0.072452	1327	0.002504
1327	0.16662	1327	0.87167	1327	0.83684	1327	0.073354	1327	0.0024359
1327.1	0.16541	1327.1	0.86972	1327.1	0.83851	1327.1	0.074255	1327.1	0.0023714
1327.2	0.1642	1327.2	0.86788	1327.2	0.84035	1327.2	0.075148	1327.2	0.0023278
1327.3	0.16292	1327.3	0.86638	1327.3	0.84214	1327.3	0.076025	1327.3	0.0022896
1327.4	0.16164	1327.4	0.86427	1327.4	0.84366	1327.4	0.07691	1327.4	0.0022597
1327.5	0.16041	1327.5	0.86224	1327.5	0.84545	1327.5	0.077774	1327.5	0.0022423
1327.6	0.15918	1327.6	0.86067	1327.6	0.84724	1327.6	0.078656	1327.6	0.0022365
1327.6	0.15778	1327.6	0.85855	1327.6	0.84867	1327.6	0.079469	1327.6	0.0022431
1327.7	0.15646	1327.7	0.85636	1327.7	0.85039	1327.7	0.080326	1327.7	0.0022618
1327.8	0.15523	1327.8	0.85481	1327.8	0.85231	1327.8	0.081222	1327.8	0.002295
1327.9	0.15391	1327.9	0.85262	1327.9	0.85364	1327.9	0.082031	1327.9	0.0023448
1328	0.15261	1328	0.85024	1328	0.85532	1328	0.082865	1328	0.0024064
1328.1	0.15132	1328.1	0.84861	1328.1	0.85731	1328.1	0.083694	1328.1	0.0024763
1328.2	0.14999	1328.2	0.84656	1328.2	0.85868	1328.2	0.08446	1328.2	0.0025485
1328.3	0.14877	1328.2	0.8442	1328.3	0.86029	1328.2	0.085277	1328.2	0.0026255
1328.3	0.14758	1328.3	0.84254	1328.3	0.8624	1328.3	0.086162	1328.3	0.0027127
1328.4	0.14627	1328.4	0.84056	1328.4	0.86387	1328.4	0.086935	1328.4	0.0027985
1328.5	0.14497	1328.5	0.83816	1328.5	0.86542	1328.5	0.087737	1328.5	0.0028743
1328.6	0.14382	1328.6	0.83655	1328.6	0.86766	1328.6	0.088632	1328.6	0.0029618
1328.7	0.14254	1328.7	0.83467	1328.7	0.86925	1328.7	0.089443	1328.7	0.0030623
1328.8	0.1413	1328.8	0.83225	1328.8	0.87079	1328.8	0.090279	1328.8	0.0031364
1328.9	0.14019	1328.9	0.83063	1328.9	0.8731	1328.8	0.091179	1328.9	0.0032058
1328.9	0.13896	1328.9	0.82895	1328.9	0.87487	1328.9	0.092047	1328.9	0.0032751
1329	0.13779	1329	0.82663	1329	0.87633	1329	0.092867	1329	0.0033325
1329.1	0.13666	1329.1	0.82494	1329.1	0.87867	1329.1	0.093826	1329.1	0.0033741
1329.2	0.13547	1329.2	0.82338	1329.2	0.88061	1329.2	0.094772	1329.2	0.0034162
1329.3	0.13423	1329.3	0.82124	1329.3	0.88209	1329.3	0.095661	1329.3	0.0034484
1329.4	0.13316	1329.4	0.81956	1329.4	0.8844	1329.4	0.096698	1329.4	0.0034618
1329.5	0.13204	1329.5	0.81803	1329.5	0.88646	1329.5	0.097701	1329.5	0.0034655
1329.5	0.1308	1329.5	0.816	1329.5	0.88796	1329.5	0.098672	1329.5	0.0034665
1329.6	0.12975	1329.6	0.81429	1329.6	0.8901	1329.6	0.099748	1329.6	0.0034678
1329.7	0.12865	1329.7	0.81279	1329.7	0.89223	1329.7	0.10082	1329.7	0.0034643
1329.8	0.12744	1329.8	0.8109	1329.8	0.89372	1329.8	0.10184	1329.8	0.0034474
1329.9	0.12635	1329.9	0.80919	1329.9	0.89579	1329.9	0.10294	1329.9	0.0034129
1330	0.12531	1330	0.80772	1330	0.89789	1330	0.10408	1330	0.0033957
1330.1	0.12414	1330.1	0.80592	1330.1	0.89943	1330.1	0.10514	1330.1	0.0033637
1330.2	0.1231	1330.2	0.80413	1330.2	0.90132	1330.1	0.10633	1330.2	0.0033304
1330.2	0.12211	1330.2	0.8025	1330.2	0.90336	1330.2	0.10751	1330.2	0.0033019
1330.3	0.12098	1330.3	0.80078	1330.3	0.90491	1330.3	0.10862	1330.3	0.0032661
1330.4	0.11996	1330.4	0.79907	1330.4	0.90664	1330.4	0.10981	1330.4	0.0032401
1330.5	0.11895	1330.5	0.79735	1330.5	0.90857	1330.5	0.11103	1330.5	0.0031952
1330.6	0.11792	1330.6	0.79554	1330.6	0.91014	1330.6	0.11217	1330.6	0.0031782
1330.7	0.1169	1330.7	0.79385	1330.7	0.91175	1330.7	0.11338	1330.7	0.0031237
1330.8	0.11594	1330.8	0.79195	1330.8	0.91351	1330.8	0.11462	1330.8	0.0030646
1330.8	0.11491	1330.8	0.79015	1330.8	0.91506	1330.8	0.11582	1330.8	0.003021
1330.9	0.1139	1330.9	0.78843	1330.9	0.91659	1330.9	0.11704	1330.9	0.0029742
1331	0.11291	1331	0.78642	1331	0.9182	1331	0.11829	1331	0.0029177
1331.1	0.11191	1331.1	0.78453	1331.1	0.91975	1331.1	0.11953	1331.1	0.0028836
1331.2	0.11094	1331.2	0.7828	1331.2	0.92119	1331.2	0.12081	1331.2	0.0028083
1331.3	0.10997	1331.3	0.78075	1331.3	0.9226	1331.3	0.12207	1331.3	0.002754
1331.4	0.109	1331.4	0.77874	1331.4	0.9241	1331.4	0.12336	1331.4	0.0026951
1331.5	0.10804	1331.5	0.777	1331.5	0.92557	1331.4	0.12465	1331.5	0.0026292
1331.5	0.10707	1331.5	0.77484	1331.5	0.92678	1331.5	0.12594	1331.5	0.0025704
1331.6	0.10614	1331.6	0.77278	1331.6	0.92823	1331.6	0.12727	1331.6	0.0025153
1331.7	0.10515	1331.7	0.77109	1331.7	0.92968	1331.7	0.12863	1331.7	0.0024549
1331.8	0.10415	1331.8	0.76892	1331.8	0.93077	1331.8	0.12995	1331.8	0.0023998
1331.9	0.10325	1331.9	0.76668	1331.9	0.9321	1331.9	0.13131	1331.9	0.0023431
1332	0.10231	1332	0.76499	1332	0.93359	1332	0.13268	1332	0.0022851
1332.1	0.10128	1332.1	0.76284	1332.1	0.93454	1332.1	0.134	1332.1	0.0022364
1332.2	0.10036	1332.1	0.76056	1332.2	0.93575	1332.1	0.13537	1332.1	0.0021808
1332.2	0.099429	1332.2	0.75891	1332.2	0.93731	1332.2	0.13684	1332.2	0.0021149
1332.3	0.098487	1332.3	0.75686	1332.3	0.93815	1332.3	0.13821	1332.3	0.0020727
1332.4	0.097599	1332.4	0.75446	1332.4	0.93924	1332.4	0.13961	1332.4	0.002027
1332.5	0.096674	1332.5	0.75276	1332.5	0.94083	1332.5	0.1411	1332.5	0.0019981
1332.6	0.095695	1332.6	0.75084	1332.6	0.94169	1332.6	0.14243	1332.6	0.0019486
1332.7	0.094834	1332.7	0.74852	1332.7	0.9426	1332.7	0.14381	1332.7	0.0018814
1332.8	0.094	1332.8	0.74686	1332.8	0.94423	1332.8	0.14529	1332.8	0.0018464
1332.8	0.093096	1332.8	0.74498	1332.8	0.94516	1332.8	0.14666	1332.8	0.001785
1332.9	0.092253	1332.9	0.74257	1332.9	0.94593	1332.9	0.14799	1332.9	0.001745
1333	0.091446	1333	0.74084	1333	0.94757	1333	0.14945	1333	0.0016978
1333.1	0.090574	1333.1	0.73913	1333.1	0.9486	1333.1	0.15081	1333.1	0.001653
1333.2	0.089695	1333.2	0.73682	1333.2	0.94932	1333.2	0.15211	1333.2	0.0016103
1333.3	0.088867	1333.3	0.73504	1333.3	0.95093	1333.3	0.15358	1333.3	0.001575
1333.4	0.088054	1333.4	0.73338	1333.4	0.9521	1333.4	0.15493	1333.4	0.0015266
1333.5	0.087263	1333.5	0.7311	1333.5	0.95272	1333.4	0.15617	1333.5	0.0014866
1333.5	0.086571	1333.5	0.72924	1333.5	0.95426	1333.5	0.15759	1333.5	0.0014395
1333.6	0.085782	1333.6	0.72764	1333.6	0.95557	1333.6	0.15894	1333.6	0.001381
1333.7	0.084965	1333.7	0.72549	1333.7	0.95626	1333.7	0.16017	1333.7	0.0013453
1333.8	0.084286	1333.8	0.7236	1333.8	0.95775	1333.8	0.16154	1333.8	0.0013215
1333.9	0.083558	1333.9	0.72199	1333.9	0.95918	1333.9	0.1629	1333.9	0.0012887
1334	0.082781	1334	0.71999	1334	0.95991	1334	0.16417	1334	0.0012515
1334.1	0.082076	1334.1	0.71807	1334.1	0.96126	1334.1	0.16554	1334.1	0.0012208
1334.2	0.081405	1334.1	0.71645	1334.2	0.96273	1334.1	0.16695	1334.2	0.0012005
1334.2	0.080648	1334.2	0.71453	1334.2	0.96354	1334.2	0.16819	1334.2	0.0011842
1334.3	0.079971	1334.3	0.71266	1334.3	0.96483	1334.3	0.16958	1334.3	0.0011738
1334.4	0.079272	1334.4	0.711	1334.4	0.96627	1334.4	0.17102	1334.4	0.0011579
1334.5	0.078561	1334.5	0.70921	1334.5	0.96714	1334.5	0.17232	1334.5	0.0011617
1334.6	0.077876	1334.6	0.7074	1334.6	0.96826	1334.6	0.17373	1334.6	0.0011571
1334.7	0.077123	1334.7	0.7057	1334.7	0.96965	1334.7	0.17522	1334.7	0.0011342
1334.8	0.076392	1334.8	0.70399	1334.8	0.97057	1334.8	0.1766	1334.8	0.0011378
1334.9	0.075654	1334.8	0.70238	1334.9	0.97156	1334.8	0.17806	1334.8	0.0011328
1334.9	0.074931	1334.9	0.70073	1334.9	0.97286	1334.9	0.17957	1334.9	0.0011397
1335	0.074165	1335	0.69908	1335	0.97378	1335	0.18104	1335	0.0011356
1335.1	0.073395	1335.1	0.69749	1335.1	0.97467	1335.1	0.18255	1335.1	0.0011342
1335.2	0.072671	1335.2	0.69584	1335.2	0.97571	1335.2	0.1841	1335.2	0.0011139
1335.3	0.071926	1335.3	0.69428	1335.3	0.97664	1335.3	0.18568	1335.3	0.0011082
1335.4	0.071141	1335.4	0.69285	1335.4	0.97746	1335.4	0.18724	1335.4	0.0010748
1335.5	0.07037	1335.5	0.6912	1335.5	0.97831	1335.5	0.18885	1335.5	0.0010423
1335.6	0.069603	1335.5	0.68962	1335.6	0.97922	1335.5	0.19047	1335.5	0.0010118
1335.6	0.068772	1335.6	0.68826	1335.6	0.97994	1335.6	0.19209	1335.6	0.00096849
1335.7	0.067982	1335.7	0.68662	1335.7	0.98056	1335.7	0.19375	1335.7	0.00092839
1335.8	0.067233	1335.8	0.68499	1335.8	0.98134	1335.8	0.19544	1335.8	0.00087576
1335.9	0.066444	1335.9	0.68364	1335.9	0.98211	1335.9	0.19712	1335.9	0.0008144
1336	0.065683	1336	0.68197	1336	0.98251	1336	0.19877	1336	0.00075264
1336.1	0.064992	1336.1	0.68023	1336.1	0.98319	1336.1	0.20049	1336.1	0.00069208
1336.2	0.064247	1336.2	0.67891	1336.2	0.98398	1336.2	0.20226	1336.2	0.00061607
1336.2	0.063532	1336.2	0.67722	1336.2	0.98424	1336.2	0.20394	1336.2	0.00054886
1336.3	0.062888	1336.3	0.67532	1336.3	0.98474	1336.3	0.20568	1336.3	0.00046984
1336.4	0.062268	1336.4	0.67403	1336.4	0.98558	1336.4	0.20749	1336.4	0.00039876
1336.5	0.061672	1336.5	0.67234	1336.5	0.98577	1336.5	0.2092	1336.5	0.00034912
1336.6	0.061119	1336.6	0.67027	1336.6	0.98612	1336.6	0.21094	1336.6	0.00026796
1336.7	0.060621	1336.7	0.66889	1336.7	0.98703	1336.7	0.21279	1336.7	0.00020493
1336.8	0.060139	1336.8	0.66724	1336.8	0.98719	1336.8	0.21448	1336.8	0.00011586
1336.9	0.059704	1336.9	0.6651	1336.9	0.98742	1336.9	0.2162	1336.9	5.635e-05
1336.9	0.059277	1336.9	0.66355	1336.9	0.98833	1336.9	0.21806	1336.9	1.104e-05
1337	0.058909	1337	0.66195	1337	0.9886	1337	0.21976	1337	-2.2443e-05
1337.1	0.058516	1337.1	0.6598	1337.1	0.98869	1337.1	0.22145	1337.1	-2.0827e-05
1337.2	0.058191	1337.2	0.65824	1337.2	0.98962	1337.2	0.22331	1337.2	-5.736e-05
1337.3	0.057846	1337.3	0.65669	1337.3	0.99	1337.3	0.22502	1337.3	-7.4066e-05
1337.4	0.057554	1337.4	0.65451	1337.4	0.98998	1337.4	0.22666	1337.4	-6.1134e-05
1337.5	0.057319	1337.5	0.65286	1337.5	0.99092	1337.5	0.22851	1337.5	-4.9753e-05
1337.6	0.057035	1337.6	0.65146	1337.6	0.99141	1337.6	0.23022	1337.6	-2.4312e-05
1337.7	0.056766	1337.6	0.64948	1337.7	0.99142	1337.6	0.23182	1337.6	2.6981e-05
1337.7	0.056524	1337.7	0.64787	1337.7	0.99228	1337.7	0.23367	1337.7	8.4995e-05
1337.8	0.056213	1337.8	0.64649	1337.8	0.99292	1337.8	0.2354	1337.8	0.00015508
1337.9	0.055903	1337.9	0.64462	1337.9	0.99284	1337.9	0.23695	1337.9	0.00025265
1338	0.055604	1338	0.64299	1338	0.99362	1338	0.23874	1338	0.00035926
1338.1	0.055287	1338.1	0.64168	1338.1	0.99436	1338.1	0.24052	1338.1	0.00046739
1338.2	0.054906	1338.2	0.64003	1338.2	0.99435	1338.2	0.24208	1338.2	0.000572
1338.3	0.05458	1338.3	0.6385	1338.3	0.99506	1338.3	0.24384	1338.3	0.00070933
1338.4	0.054216	1338.3	0.63728	1338.4	0.99583	1338.3	0.24565	1338.4	0.0008474
1338.4	0.053802	1338.4	0.63572	1338.4	0.99584	1338.4	0.24724	1338.4	0.0010049
1338.5	0.053411	1338.5	0.63424	1338.5	0.99635	1338.5	0.249	1338.5	0.0011559
1338.6	0.052983	1338.6	0.63298	1338.6	0.99711	1338.6	0.25083	1338.6	0.0012955
1338.7	0.052527	1338.7	0.63159	1338.7	0.99714	1338.7	0.25246	1338.7	0.001449
1338.8	0.052083	1338.8	0.63017	1338.8	0.99756	1338.8	0.25423	1338.8	0.0015895
1338.9	0.051667	1338.9	0.62894	1338.9	0.99827	1338.9	0.25612	1338.9	0.0017254
1339	0.051244	1339	0.62759	1339	0.99837	1339	0.2578	1339	0.0018638
1339.1	0.050781	1339.1	0.62621	1339.1	0.9986	1339	0.25959	1339.1	0.0019802
1339.1	0.050335	1339.1	0.62486	1339.1	0.99913	1339.1	0.26149	1339.1	0.0020734
1339.2	0.049888	1339.2	0.62347	1339.2	0.99924	1339.2	0.26328	1339.2	0.0021749
1339.3	0.049442	1339.3	0.62219	1339.3	0.99931	1339.3	0.26506	1339.3	0.0022569
1339.4	0.049021	1339.4	0.62079	1339.4	0.99972	1339.4	0.26699	1339.4	0.0023188
1339.5	0.048578	1339.5	0.6194	1339.5	0.99983	1339.5	0.26886	1339.5	0.0023837
1339.6	0.04818	1339.6	0.61807	1339.6	0.99983	1339.6	0.27069	1339.6	0.0024224
1339.7	0.04779	1339.7	0.61662	1339.7	0.99994	1339.7	0.27262	1339.7	0.002453
1339.8	0.047392	1339.8	0.61521	1339.8	1	1339.8	0.27452	1339.8	0.0024828
1339.8	0.046971	1339.8	0.6139	1339.8	0.99995	1339.8	0.2764	1339.8	0.0024963
1339.9	0.046609	1339.9	0.61244	1339.9	0.99986	1339.9	0.27832	1339.9	0.0024798
1340	0.046216	1340	0.61099	1340	0.99988	1340	0.28027	1340	0.0024635
1340.1	0.045819	1340.1	0.60976	1340.1	0.99979	1340.1	0.28216	1340.1	0.0024461
1340.2	0.045426	1340.2	0.60827	1340.2	0.99947	1340.2	0.28402	1340.2	0.0024113
1340.3	0.045057	1340.3	0.60676	1340.3	0.99935	1340.3	0.28594	1340.3	0.0023799
1340.4	0.044641	1340.4	0.6056	1340.4	0.99936	1340.4	0.28789	1340.4	0.0023394
1340.5	0.044252	1340.5	0.6042	1340.5	0.99888	1340.5	0.28972	1340.5	0.0023163
1340.5	0.043928	1340.5	0.60263	1340.5	0.99862	1340.5	0.29161	1340.5	0.0022836
1340.6	0.043543	1340.6	0.60155	1340.6	0.99867	1340.6	0.29356	1340.6	0.002249
1340.7	0.043135	1340.7	0.60021	1340.7	0.9981	1340.7	0.29533	1340.7	0.0022242
1340.8	0.042741	1340.8	0.59862	1340.8	0.99765	1340.8	0.29714	1340.8	0.0021897
1340.9	0.042343	1340.9	0.59762	1340.9	0.99774	1340.9	0.29907	1340.9	0.0021885
1341	0.041928	1341	0.59645	1341	0.9972	1341	0.30085	1341	0.0021732
1341.1	0.041576	1341.1	0.59493	1341.1	0.99661	1341.1	0.30261	1341.1	0.00218
1341.2	0.041253	1341.2	0.59393	1341.2	0.99675	1341.2	0.30457	1341.2	0.0021778
1341.3	0.040916	1341.3	0.59293	1341.3	0.99624	1341.2	0.30631	1341.3	0.0021918
1341.3	0.040604	1341.3	0.59142	1341.3	0.99555	1341.3	0.30803	1341.3	0.0021899
1341.4	0.040324	1341.4	0.59042	1341.4	0.99566	1341.4	0.30994	1341.4	0.002197
1341.5	0.040068	1341.5	0.58956	1341.5	0.99529	1341.5	0.31168	1341.5	0.0022195
1341.6	0.039813	1341.6	0.58819	1341.6	0.99454	1341.6	0.31337	1341.6	0.0022477
1341.7	0.039588	1341.7	0.58724	1341.7	0.99466	1341.7	0.31529	1341.7	0.0022534
1341.8	0.03938	1341.8	0.58646	1341.8	0.99439	1341.8	0.31708	1341.8	0.0022714
1341.9	0.039216	1341.9	0.58517	1341.9	0.99353	1341.9	0.31873	1341.9	0.002276
1342	0.039087	1342	0.58414	1342	0.99364	1342	0.3207	1342	0.0022802
1342	0.038985	1342	0.58341	1342	0.99349	1342	0.32251	1342	0.0022793
1342.1	0.038927	1342.1	0.58225	1342.1	0.9927	1342.1	0.32416	1342.1	0.002287
1342.2	0.038864	1342.2	0.58126	1342.2	0.99274	1342.2	0.32618	1342.2	0.002282
1342.3	0.038835	1342.3	0.58056	1342.3	0.99272	1342.3	0.32809	1342.3	0.0022656
1342.4	0.038772	1342.4	0.57943	1342.4	0.99189	1342.4	0.32978	1342.4	0.0022425
1342.5	0.038776	1342.5	0.57836	1342.5	0.99179	1342.5	0.33176	1342.5	0.002218
1342.6	0.038747	1342.6	0.57759	1342.6	0.99188	1342.6	0.33379	1342.6	0.002193
1342.7	0.038749	1342.7	0.57654	1342.7	0.99113	1342.7	0.33553	1342.7	0.00217
1342.8	0.038724	1342.8	0.57547	1342.8	0.99099	1342.7	0.33756	1342.8	0.0021377
1342.8	0.03871	1342.8	0.57468	1342.8	0.99113	1342.8	0.33969	1342.8	0.0021017
1342.9	0.038727	1342.9	0.57367	1342.9	0.99045	1342.9	0.34154	1342.9	0.0020554
1343	0.038723	1343	0.57258	1343	0.99013	1343	0.34355	1343	0.0020332
1343.1	0.038665	1343.1	0.57168	1343.1	0.99022	1343.1	0.34575	1343.1	0.0020104
1343.2	0.038575	1343.2	0.57069	1343.2	0.98969	1343.2	0.34767	1343.2	0.0019852
1343.3	0.038494	1343.3	0.56963	1343.3	0.98928	1343.3	0.3497	1343.3	0.0019622
1343.4	0.038433	1343.4	0.56867	1343.4	0.98931	1343.4	0.35196	1343.4	0.0019554
1343.5	0.038351	1343.5	0.56769	1343.5	0.98888	1343.5	0.35394	1343.5	0.0019659
1343.5	0.038234	1343.5	0.56666	1343.5	0.98841	1343.5	0.35601	1343.5	0.0019824
1343.6	0.038107	1343.6	0.56563	1343.6	0.98826	1343.6	0.35825	1343.6	0.0020053
1343.7	0.037999	1343.7	0.56465	1343.7	0.98789	1343.7	0.36035	1343.7	0.0020443
1343.8	0.037863	1343.8	0.56371	1343.8	0.98737	1343.8	0.36243	1343.8	0.0020909
1343.9	0.037687	1343.9	0.56269	1343.9	0.98707	1343.9	0.36466	1343.9	0.002138
1344	0.037536	1344	0.5617	1344	0.98669	1344	0.36678	1344	0.0022042
1344.1	0.037401	1344.1	0.56083	1344.1	0.98619	1344.1	0.36886	1344.1	0.0022598
1344.2	0.037263	1344.2	0.55987	1344.2	0.98568	1344.2	0.371	1344.2	0.0023251
1344.3	0.037127	1344.3	0.55886	1344.3	0.98522	1344.3	0.37311	1344.3	0.0024286
1344.3	0.03703	1344.3	0.55808	1344.3	0.98472	1344.3	0.3752	1344.3	0.0025147
1344.4	0.036929	1344.4	0.55714	1344.4	0.98404	1344.4	0.37728	1344.4	0.0025866
1344.5	0.036843	1344.5	0.55614	1344.5	0.98349	1344.5	0.37942	1344.5	0.0026754
1344.6	0.036752	1344.6	0.55548	1344.6	0.98299	1344.6	0.38151	1344.6	0.0027497
1344.7	0.036696	1344.7	0.55463	1344.7	0.98213	1344.7	0.38348	1344.7	0.002832
1344.8	0.036678	1344.8	0.55356	1344.8	0.98139	1344.8	0.38554	1344.8	0.0028728
1344.9	0.036616	1344.9	0.55293	1344.9	0.98094	1344.9	0.38765	1344.9	0.0029461
1345	0.036607	1345	0.55214	1345	0.98001	1345	0.38959	1345	0.0029978
1345.1	0.036653	1345.1	0.55105	1345.1	0.97914	1345	0.3916	1345.1	0.0030419
1345.1	0.036666	1345.1	0.55036	1345.1	0.97869	1345.1	0.39371	1345.1	0.0030763
1345.2	0.036721	1345.2	0.54965	1345.2	0.97769	1345.2	0.3956	1345.2	0.0030995
1345.3	0.036781	1345.3	0.5485	1345.3	0.97667	1345.3	0.39754	1345.3	0.0031138
1345.4	0.036808	1345.4	0.54775	1345.4	0.97623	1345.4	0.39966	1345.4	0.0031203
1345.5	0.036835	1345.5	0.54702	1345.5	0.97528	1345.5	0.40154	1345.5	0.0031221
1345.6	0.036904	1345.6	0.54583	1345.6	0.97414	1345.6	0.40344	1345.6	0.0031098
1345.7	0.036925	1345.7	0.54499	1345.7	0.97374	1345.7	0.40561	1345.7	0.0031056
1345.8	0.036996	1345.8	0.54425	1345.8	0.97287	1345.8	0.40758	1345.8	0.0030707
1345.9	0.037037	1345.8	0.543	1345.9	0.97164	1345.8	0.40946	1345.9	0.0030531
1345.9	0.037089	1345.9	0.54208	1345.9	0.97125	1345.9	0.41169	1345.9	0.0030153
1346	0.037138	1346	0.54126	1346	0.97054	1346	0.41372	1346	0.0029849
1346.1	0.037178	1346.1	0.54002	1346.1	0.96929	1346.1	0.4156	1346.1	0.0029435
1346.2	0.037202	1346.2	0.53894	1346.2	0.96888	1346.2	0.41783	1346.2	0.0029333
1346.3	0.037209	1346.3	0.53808	1346.3	0.96828	1346.3	0.41995	1346.3	0.0029251
1346.4	0.037196	1346.4	0.53679	1346.4	0.96701	1346.4	0.42185	1346.4	0.0029154
1346.5	0.037176	1346.5	0.5356	1346.5	0.96659	1346.5	0.42414	1346.5	0.0028943
1346.6	0.037168	1346.6	0.53475	1346.6	0.96618	1346.6	0.42633	1346.6	0.0028916
1346.7	0.037132	1346.6	0.53348	1346.7	0.96499	1346.6	0.42824	1346.6	0.0029005
1346.7	0.037119	1346.7	0.53228	1346.7	0.96448	1346.7	0.43052	1346.7	0.0029235
1346.8	0.037063	1346.8	0.53135	1346.8	0.96421	1346.8	0.43286	1346.8	0.0029479
1346.9	0.036987	1346.9	0.53014	1346.9	0.96305	1346.9	0.43478	1346.9	0.0029797
1347	0.036913	1347	0.52887	1347	0.96243	1347	0.43697	1347	0.0030237
1347.1	0.036877	1347.1	0.52789	1347.1	0.96222	1347.1	0.43935	1347.1	0.0030751
1347.2	0.036835	1347.2	0.52673	1347.2	0.9612	1347.2	0.4413	1347.2	0.0031268
1347.3	0.036738	1347.3	0.52545	1347.3	0.96052	1347.3	0.44348	1347.3	0.0032214
1347.4	0.03668	1347.4	0.52444	1347.4	0.96021	1347.4	0.44582	1347.4	0.003286
1347.5	0.03662	1347.4	0.52332	1347.5	0.9593	1347.4	0.44779	1347.4	0.0033635
1347.5	0.036568	1347.5	0.52206	1347.5	0.9584	1347.5	0.44985	1347.5	0.0034594
1347.6	0.036534	1347.6	0.52095	1347.6	0.95808	1347.6	0.4522	1347.6	0.003575
1347.7	0.03646	1347.7	0.51984	1347.7	0.95725	1347.7	0.45418	1347.7	0.0036864
1347.8	0.036412	1347.8	0.51862	1347.8	0.95633	1347.8	0.4562	1347.8	0.0038116
1347.9	0.036397	1347.9	0.51744	1347.9	0.95586	1347.9	0.45844	1347.9	0.003922
1348	0.036394	1348	0.51627	1348	0.95507	1348	0.46045	1348	0.0040561
1348.1	0.036366	1348.1	0.51502	1348.1	0.95404	1348.1	0.46243	1348.1	0.0041814
1348.2	0.036353	1348.2	0.51379	1348.2	0.95329	1348.2	0.46453	1348.2	0.0043135
1348.3	0.036403	1348.2	0.5125	1348.3	0.95247	1348.2	0.46648	1348.3	0.0044519
1348.3	0.036427	1348.3	0.5113	1348.3	0.95143	1348.3	0.46843	1348.3	0.0045762
1348.4	0.036434	1348.4	0.5099	1348.4	0.9505	1348.4	0.47048	1348.4	0.00472
1348.5	0.036471	1348.5	0.50844	1348.5	0.94953	1348.5	0.47246	1348.5	0.004849
1348.6	0.036514	1348.6	0.50718	1348.6	0.94847	1348.6	0.47441	1348.6	0.0049668
1348.7	0.036567	1348.7	0.5057	1348.7	0.94734	1348.7	0.47638	1348.7	0.005098
1348.8	0.036618	1348.8	0.50418	1348.8	0.9463	1348.8	0.47838	1348.8	0.0052159
1348.9	0.036696	1348.9	0.50285	1348.9	0.94525	1348.9	0.48035	1348.9	0.0053295
1349	0.036782	1349	0.50133	1349	0.94397	1349	0.48227	1349	0.0054531
1349.1	0.036885	1349.1	0.4996	1349.1	0.94282	1349	0.48427	1349.1	0.0055563
1349.1	0.03695	1349.1	0.49818	1349.1	0.94181	1349.1	0.48628	1349.1	0.0056896
1349.2	0.037021	1349.2	0.49661	1349.2	0.94044	1349.2	0.48816	1349.2	0.0057889
1349.3	0.037124	1349.3	0.49473	1349.3	0.93912	1349.3	0.49014	1349.3	0.0058905
1349.4	0.037179	1349.4	0.49326	1349.4	0.93824	1349.4	0.49225	1349.4	0.0059799
1349.5	0.037275	1349.5	0.49174	1349.5	0.93694	1349.5	0.49416	1349.5	0.0060721
1349.6	0.037331	1349.6	0.48982	1349.6	0.93557	1349.6	0.49613	1349.6	0.0061492
1349.7	0.037402	1349.7	0.48825	1349.7	0.93474	1349.7	0.49829	1349.7	0.0062424
1349.8	0.037489	1349.8	0.48671	1349.8	0.93352	1349.8	0.50025	1349.8	0.0063283
1349.9	0.037538	1349.9	0.48478	1349.9	0.93212	1349.9	0.50222	1349.9	0.0064138
1349.9	0.037558	1349.9	0.48321	1349.9	0.93141	1349.9	0.50445	1349.9	0.0065014
1350	0.037635	1350	0.48167	1350	0.93031	1350	0.50643	1350	0.0065815
1350.1	0.037627	1350.1	0.47972	1350.1	0.92883	1350.1	0.50828	1350.1	0.00666
1350.2	0.037652	1350.2	0.47808	1350.2	0.92825	1350.2	0.51062	1350.2	0.0067406
1350.3	0.037672	1350.3	0.47657	1350.3	0.92731	1350.3	0.51266	1350.3	0.0068363
1350.4	0.037686	1350.4	0.4747	1350.4	0.92586	1350.4	0.5145	1350.4	0.0069335
1350.5	0.037696	1350.5	0.47298	1350.5	0.92524	1350.5	0.51681	1350.5	0.0070408
1350.6	0.037718	1350.6	0.47156	1350.6	0.92455	1350.6	0.51896	1350.6	0.0071296
1350.7	0.03772	1350.7	0.46975	1350.7	0.92315	1350.7	0.52075	1350.7	0.0072025
1350.8	0.037698	1350.7	0.46803	1350.8	0.92243	1350.7	0.52293	1350.7	0.0072742
1350.8	0.037682	1350.8	0.4666	1350.8	0.92183	1350.8	0.52514	1350.8	0.0073642
1350.9	0.037643	1350.9	0.46473	1350.9	0.92037	1350.9	0.52688	1350.9	0.0074647
1351	0.037616	1351	0.46288	1351	0.91959	1351	0.52905	1351	0.0075482
1351.1	0.037601	1351.1	0.46135	1351.1	0.919	1351.1	0.53128	1351.1	0.0076252
1351.2	0.037557	1351.2	0.45957	1351.2	0.91759	1351.2	0.53299	1351.2	0.0077112
1351.3	0.037506	1351.3	0.45767	1351.3	0.91664	1351.3	0.5351	1351.3	0.007792
1351.4	0.037495	1351.4	0.45611	1351.4	0.91607	1351.4	0.53736	1351.4	0.007892
1351.5	0.037427	1351.5	0.45428	1351.5	0.91457	1351.5	0.53903	1351.5	0.0079574
1351.6	0.037361	1351.6	0.45234	1351.6	0.91338	1351.5	0.54105	1351.6	0.0080493
1351.6	0.037317	1351.6	0.45061	1351.6	0.91275	1351.6	0.54334	1351.6	0.0081267
1351.7	0.037254	1351.7	0.4488	1351.7	0.91148	1351.7	0.54518	1351.7	0.0082358
1351.8	0.037191	1351.8	0.4468	1351.8	0.9102	1351.8	0.54718	1351.8	0.0083455
1351.9	0.037141	1351.9	0.44495	1351.9	0.90943	1351.9	0.54949	1351.9	0.008444
1352	0.037104	1352	0.44301	1352	0.90813	1352	0.55139	1352	0.0085459
1352.1	0.037063	1352.1	0.44093	1352.1	0.90657	1352.1	0.55328	1352.1	0.0086535
1352.2	0.03704	1352.2	0.43887	1352.2	0.90543	1352.2	0.55545	1352.2	0.0087641
1352.3	0.036992	1352.3	0.43691	1352.3	0.90412	1352.3	0.55745	1352.3	0.0088934
1352.4	0.036929	1352.4	0.43485	1352.4	0.90256	1352.4	0.55939	1352.4	0.0090084
1352.5	0.036897	1352.4	0.43277	1352.5	0.90142	1352.4	0.56164	1352.4	0.0091397
1352.5	0.036901	1352.5	0.43068	1352.5	0.9	1352.5	0.56368	1352.5	0.009288
1352.6	0.036859	1352.6	0.42856	1352.6	0.89833	1352.6	0.56566	1352.6	0.0094289
1352.7	0.03684	1352.7	0.42637	1352.7	0.89684	1352.7	0.56778	1352.7	0.0095986
1352.8	0.036841	1352.8	0.42415	1352.8	0.89515	1352.8	0.56971	1352.8	0.0097499
1352.9	0.036851	1352.9	0.42206	1352.9	0.89343	1352.9	0.57166	1352.9	0.0099199
1353	0.036874	1353	0.41982	1353	0.89176	1353	0.57374	1353	0.010101
1353.1	0.036881	1353.1	0.41757	1353.1	0.89005	1353.1	0.57579	1353.1	0.010274
1353.2	0.036896	1353.2	0.41537	1353.2	0.88824	1353.2	0.57771	1353.2	0.010487
1353.3	0.036881	1353.3	0.41309	1353.3	0.88634	1353.3	0.5797	1353.3	0.01069
1353.3	0.036907	1353.3	0.41063	1353.3	0.88433	1353.3	0.58164	1353.3	0.010872
1353.4	0.036902	1353.4	0.40841	1353.4	0.88247	1353.4	0.58359	1353.4	0.011079
1353.5	0.03693	1353.5	0.40613	1353.5	0.88036	1353.5	0.58541	1353.5	0.011269
1353.6	0.036941	1353.6	0.40368	1353.6	0.87831	1353.6	0.58734	1353.6	0.011465
1353.7	0.036901	1353.7	0.40147	1353.7	0.8764	1353.7	0.58929	1353.7	0.011677
1353.8	0.036881	1353.8	0.39915	1353.8	0.87414	1353.8	0.59101	1353.8	0.011887
1353.9	0.036829	1353.9	0.3966	1353.9	0.87186	1353.9	0.59286	1353.9	0.012103
1354	0.036765	1354	0.39425	1354	0.86991	1354	0.59478	1354	0.012309
1354.1	0.036696	1354.1	0.39194	1354.1	0.86766	1354.1	0.59652	1354.1	0.01253
1354.2	0.036594	1354.2	0.38932	1354.2	0.86526	1354.1	0.59823	1354.2	0.012735
1354.2	0.036505	1354.2	0.38696	1354.2	0.86346	1354.2	0.6003	1354.2	0.012967
1354.3	0.036409	1354.3	0.38455	1354.3	0.86116	1354.3	0.60195	1354.3	0.013184
1354.4	0.036282	1354.4	0.38191	1354.4	0.85851	1354.4	0.60346	1354.4	0.013383
1354.5	0.036186	1354.5	0.37956	1354.5	0.85679	1354.5	0.60566	1354.5	0.013621
1354.6	0.036049	1354.6	0.37723	1354.6	0.8546	1354.6	0.6074	1354.6	0.013839
1354.7	0.035907	1354.7	0.37458	1354.7	0.85182	1354.7	0.60881	1354.7	0.01405
1354.8	0.035735	1354.8	0.37207	1354.8	0.84995	1354.8	0.6109	1354.8	0.014266
1354.9	0.035584	1354.9	0.36971	1354.9	0.84786	1354.9	0.61271	1354.9	0.014515
1355	0.035408	1355	0.36707	1355	0.84509	1355	0.61411	1355	0.014713
1355.1	0.035273	1355.1	0.3645	1355.1	0.843	1355	0.61607	1355.1	0.014963
1355.1	0.035155	1355.1	0.36215	1355.1	0.84101	1355.1	0.618	1355.1	0.015232
1355.2	0.035031	1355.2	0.3595	1355.2	0.83817	1355.2	0.61936	1355.2	0.015462
1355.3	0.034924	1355.3	0.3569	1355.3	0.83585	1355.3	0.62118	1355.3	0.015695
1355.4	0.034814	1355.4	0.35448	1355.4	0.83358	1355.4	0.62292	1355.4	0.015946
1355.5	0.034715	1355.5	0.35178	1355.5	0.83023	1355.5	0.62382	1355.5	0.016165
1355.6	0.034653	1355.6	0.34908	1355.6	0.82766	1355.6	0.62547	1355.6	0.016418
1355.7	0.034615	1355.7	0.34666	1355.7	0.82543	1355.7	0.62733	1355.7	0.016701
1355.8	0.034552	1355.8	0.34403	1355.8	0.82245	1355.8	0.6286	1355.8	0.016942
1355.9	0.034536	1355.9	0.34136	1355.9	0.81971	1355.9	0.63019	1355.9	0.017245
1356	0.034547	1356	0.33883	1356	0.81724	1355.9	0.63193	1356	0.017544
1356	0.034556	1356	0.33622	1356	0.81412	1356	0.63315	1356	0.017828
1356.1	0.034573	1356.1	0.33346	1356.1	0.811	1356.1	0.63449	1356.1	0.018108
1356.2	0.034622	1356.2	0.33089	1356.2	0.80844	1356.2	0.63626	1356.2	0.018427
1356.3	0.034656	1356.3	0.32829	1356.3	0.80538	1356.3	0.63755	1356.3	0.018749
1356.4	0.034676	1356.4	0.32563	1356.4	0.80223	1356.4	0.63892	1356.4	0.019072
1356.5	0.034769	1356.5	0.32309	1356.5	0.79968	1356.5	0.64084	1356.5	0.019422
1356.6	0.034833	1356.6	0.3206	1356.6	0.79694	1356.6	0.6424	1356.6	0.019746
1356.7	0.034898	1356.7	0.31799	1356.7	0.79384	1356.7	0.64384	1356.7	0.020087
1356.8	0.034983	1356.8	0.3154	1356.8	0.791	1356.8	0.64544	1356.8	0.020446
1356.9	0.035032	1356.9	0.31288	1356.9	0.78816	1356.8	0.64705	1356.9	0.020822
1356.9	0.035066	1356.9	0.31046	1356.9	0.78544	1356.9	0.64877	1356.9	0.021205
1357	0.035156	1357	0.30804	1357	0.78305	1357	0.65082	1357	0.021611
1357.1	0.035207	1357.1	0.30565	1357.1	0.7806	1357.1	0.65277	1357.1	0.022009
1357.2	0.035244	1357.2	0.30335	1357.2	0.77822	1357.2	0.65476	1357.2	0.022417
1357.3	0.035259	1357.3	0.30104	1357.3	0.77593	1357.3	0.65689	1357.3	0.022863
1357.4	0.035262	1357.4	0.29875	1357.4	0.77363	1357.4	0.65895	1357.4	0.023284
1357.5	0.035273	1357.5	0.29653	1357.5	0.77128	1357.5	0.6609	1357.5	0.023708
1357.6	0.035273	1357.6	0.29439	1357.6	0.76911	1357.6	0.6631	1357.6	0.024152
1357.7	0.035293	1357.7	0.29219	1357.7	0.76703	1357.7	0.66537	1357.7	0.024624
1357.8	0.035292	1357.8	0.29018	1357.8	0.76512	1357.8	0.6676	1357.8	0.025121
1357.8	0.03525	1357.8	0.28813	1357.8	0.76301	1357.8	0.66976	1357.8	0.02559
1357.9	0.035177	1357.9	0.28602	1357.9	0.76102	1357.9	0.67206	1357.9	0.026092
1358	0.035121	1358	0.28399	1358	0.75904	1358	0.67422	1358	0.026587
1358.1	0.035082	1358.1	0.28193	1358.1	0.75674	1358.1	0.67617	1358.1	0.027072
1358.2	0.034996	1358.2	0.2798	1358.2	0.75477	1358.2	0.67847	1358.2	0.027592
1358.3	0.034943	1358.3	0.27784	1358.3	0.75291	1358.3	0.68075	1358.3	0.02814
1358.4	0.034883	1358.4	0.27594	1358.4	0.75094	1358.4	0.68295	1358.4	0.028698
1358.5	0.034828	1358.5	0.2738	1358.5	0.74862	1358.5	0.68491	1358.5	0.029205
1358.6	0.034739	1358.6	0.27185	1358.6	0.74677	1358.6	0.68727	1358.6	0.029779
1358.7	0.034693	1358.7	0.2699	1358.7	0.74463	1358.7	0.68937	1358.7	0.030348
1358.8	0.034646	1358.7	0.26781	1358.8	0.74231	1358.7	0.69138	1358.8	0.030913
1358.8	0.034571	1358.8	0.26588	1358.8	0.74059	1358.8	0.6939	1358.8	0.031509
1358.9	0.034513	1358.9	0.26394	1358.9	0.73839	1358.9	0.69591	1358.9	0.032085
1359	0.034449	1359	0.26183	1359	0.736	1359	0.69791	1359	0.03267
1359.1	0.034416	1359.1	0.25979	1359.1	0.7339	1359.1	0.70017	1359.1	0.033258
1359.2	0.034372	1359.2	0.25784	1359.2	0.73149	1359.2	0.70203	1359.2	0.033845
1359.3	0.034336	1359.3	0.25577	1359.3	0.72891	1359.3	0.70385	1359.3	0.034395
1359.4	0.03432	1359.4	0.25361	1359.4	0.72664	1359.4	0.70602	1359.4	0.035004
1359.5	0.034301	1359.5	0.25174	1359.5	0.72456	1359.5	0.70829	1359.5	0.035625
1359.6	0.034258	1359.6	0.24966	1359.6	0.72176	1359.6	0.70994	1359.6	0.036151
1359.7	0.034221	1359.7	0.24755	1359.7	0.71935	1359.7	0.71207	1359.7	0.036723
[truncated: 1,404 more rows]
